# Supplementary material for: Toward a Deeper Understanding of Gut Microbiome in Depression: The Promise of Clinical Applicability
Source: PubMed Central journal article supplement (PMC9762301; doi:10.1002/advs.202203707), 2022-10-26

## Supporting Information

for *Adv. Sci.*, DOI 10.1002/adv.202203707

Toward a Deeper Understanding of Gut Microbiome in Depression: The Promise of Clinical Applicability

*Lanxiang Liu, Haiyang Wang, Hanping Zhang, Xueyi Chen, Yangdong Zhang, Ji Wu, Libo Zhao, Dongfang Wang, Juncai Pu, Ping Ji and Peng Xie\**

Supplementary Tables

**Towards a deeper understanding of gut microbiome in depression:  
the promise of clinical applicability**

*Lanxiang Liu<sup>1,3,4</sup>†, Haiyang Wang<sup>2,3</sup>†, Hanping Zhang<sup>3,4</sup>†, Xueyi Chen<sup>3</sup>, Yangdong Zhang<sup>3,4</sup>, Ji Wu<sup>3,4</sup>, Libo Zhao<sup>1</sup>, Dongfang Wang<sup>3</sup>, Juncai Pu<sup>3,4</sup>, Ping Ji<sup>2</sup>, Peng Xie<sup>1,2,3,4</sup>\**

**Figure S1.** PRISMA flowchart.

**Figure S2.** Microbial  $\alpha$ -diversity in patients with depression.

**Figure S3.** Microbial  $\alpha$ -diversity in animal models of depression.

**Figure S4.** PRISMA flowchart for microbiota-based interventions of depression.

Figure S1. PRISMA flowchart.

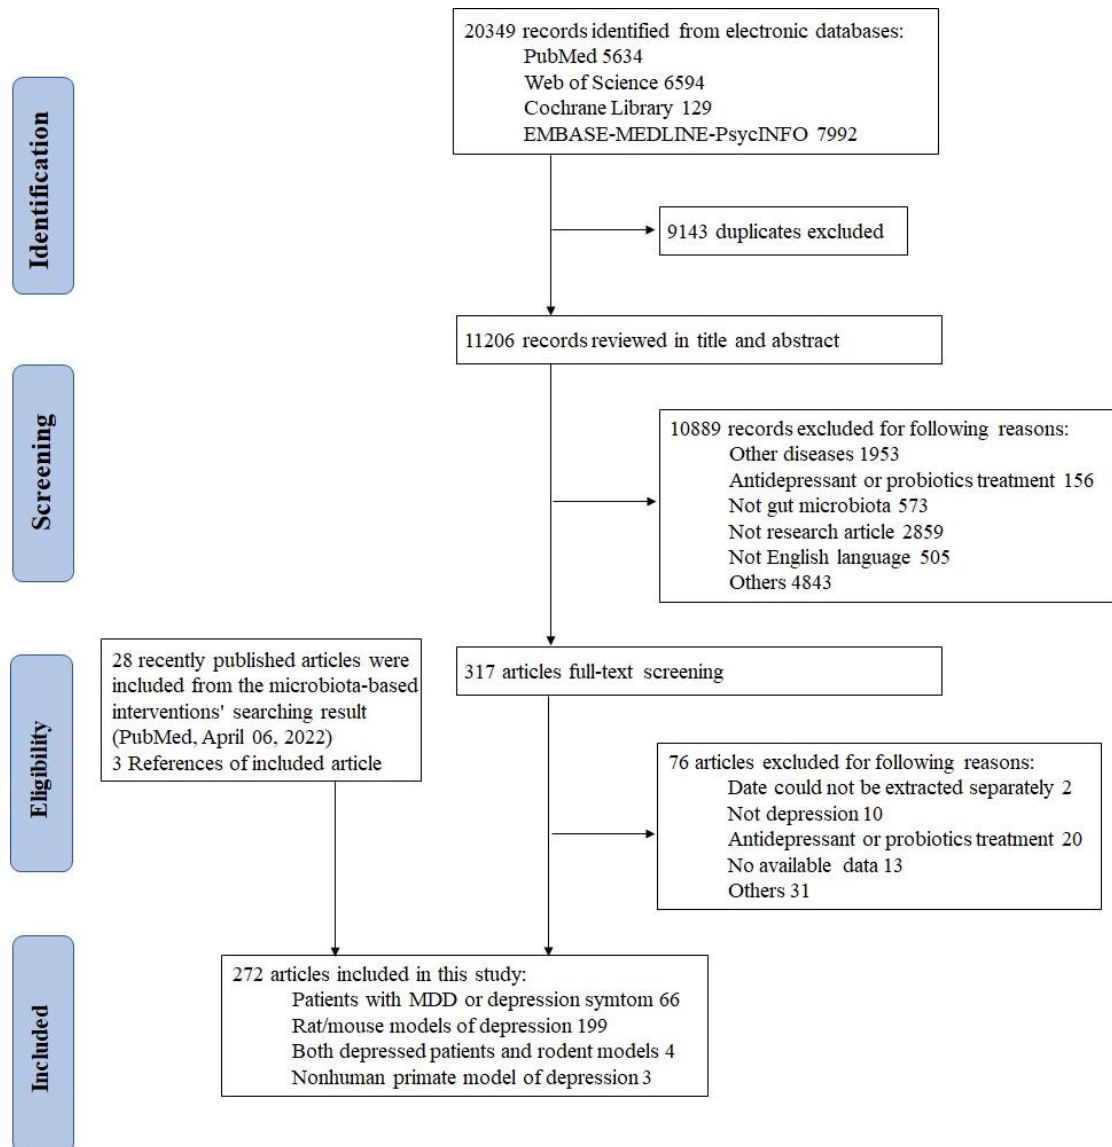

**Figure S2.** Microbial  $\alpha$ -diversity in patients with depression.

| Study                           | Diversity indices |         |                 | Richness indices |     | Other indices    |          | Depression types                        |
|---------------------------------|-------------------|---------|-----------------|------------------|-----|------------------|----------|-----------------------------------------|
|                                 | Shannon           | Simpson | Inverse Simpson | Chao-1           | ACE | Observed Species | Faith-PD |                                         |
| Bai S et al. 2021               |                   |         |                 |                  |     |                  |          | MDD                                     |
| Bai S et al. 2022               |                   |         |                 |                  |     |                  |          | MDD                                     |
| Caso JR et al. 2021             |                   |         |                 |                  |     |                  |          | MDD                                     |
| Chahwan B et al. 2019           |                   |         |                 |                  |     |                  |          | Clinical/Subclinical depression         |
| Chen DL et al. 2021             |                   |         |                 |                  |     |                  |          | UC with depression                      |
| Chen JJ et al. 2018             |                   |         |                 |                  |     |                  |          | MDD                                     |
| Chen JJ et al. 2020             |                   |         |                 |                  |     |                  |          | MDD                                     |
| Chen YH et al. 2021             |                   |         |                 |                  |     |                  |          | MDD and Controls                        |
| Chung YE et al. 2019            |                   |         |                 |                  |     |                  |          | MDD                                     |
| Ciocan D et al. 2021            |                   |         |                 |                  |     |                  |          | MDD                                     |
| Dong Z et al. 2021              |                   |         |                 |                  |     |                  |          | MDD                                     |
| Hoggard M et al. 2018           |                   |         |                 |                  |     |                  |          | Depression                              |
| Huang Y et al. 2018             |                   |         |                 |                  |     |                  |          | MDD                                     |
| Huang Y et al. 2021             |                   |         |                 |                  |     |                  |          | Stroke+ affective disorder              |
| Ishii W et al. 2019             |                   |         |                 |                  |     |                  |          | Orthostatic intolerance with depression |
| Jackson MA et al. 2018          |                   |         |                 |                  |     |                  |          | Depression                              |
| Jiang H et al. 2015             |                   |         |                 |                  |     |                  |          | MDD                                     |
| Jiang HY et al. 2020            |                   |         |                 |                  |     |                  |          | Depression                              |
| Kelly JR et al. 2016            |                   |         |                 |                  |     |                  |          | MDD                                     |
| Kleiman SC et al. 2015          |                   |         |                 |                  |     |                  |          | Depression                              |
| Kurokawa S et al. 2018          |                   |         |                 |                  |     |                  |          | IBS with depression                     |
| Lai WT et al. 2021              |                   |         |                 |                  |     |                  |          | MDD                                     |
| Ling Y et al. 2020              |                   |         |                 |                  |     |                  |          | Post-stroke depression                  |
| Liśkiewicz P et al. 2021        |                   |         |                 |                  |     |                  |          | Depression                              |
| Liu P et al. 2021               |                   |         |                 |                  |     |                  |          | MDD                                     |
| Liu RT et al. 2020              |                   |         |                 |                  |     |                  |          | MDD                                     |
| Liu Y et al. 2016               |                   |         |                 |                  |     |                  |          | Depression                              |
| Madan A et al. 2020             |                   |         |                 |                  |     |                  |          | Depression                              |
| Medina-Rodriguez EM et al. 2020 |                   |         |                 |                  |     |                  |          | MDD                                     |
| Minichino A et al. 2021         |                   |         |                 |                  |     |                  |          | Depression                              |
| Naseribafrouei A et al. 2014    |                   |         |                 |                  |     |                  |          | Depression                              |
| Qin Q et al. 2021               |                   |         |                 |                  |     |                  |          | Depression with test anxiety            |
| Ramirez-Carrillo E et al. 2020  |                   |         |                 |                  |     |                  |          | Depression                              |
| Rhee SJ et al. 2020             |                   |         |                 |                  |     |                  |          | MDD                                     |
| Rhee SJ et al. 2021             |                   |         |                 |                  |     |                  |          | Depression                              |
| Rong H et al. 2019              |                   |         |                 |                  |     |                  |          | MDD                                     |
| Shen Y et al. 2021              |                   |         |                 |                  |     |                  |          | MDD                                     |
| Simpson CA et al. 2020          |                   |         |                 |                  |     |                  |          | Depression                              |
| Stevens BR et al. 2020          |                   |         |                 |                  |     |                  |          | MDD                                     |
| Wingfield B et al. 2021         |                   |         |                 |                  |     |                  |          | MDD                                     |
| Yang J et al. 2020              |                   |         |                 |                  |     |                  |          | MDD                                     |
| Yang Y et al. 2021              |                   |         |                 |                  |     |                  |          | Depression                              |
| Ye X et al. 2021                |                   |         |                 |                  |     |                  |          | MDD                                     |
| Zhang Q et al. 2021             |                   |         |                 |                  |     |                  |          | MDD                                     |
| Zheng P et al. 2016             |                   |         |                 |                  |     |                  |          | MDD                                     |
| Zheng P et al. 2020             |                   |         |                 |                  |     |                  |          | MDD                                     |
| Zheng S et al. 2021             |                   |         |                 |                  |     |                  |          | Depression                              |
| Zhou Y et al. 2020              |                   |         |                 |                  |     |                  |          | Postpartum depressive disorder          |
| Zhu J et al. 2021               |                   |         |                 |                  |     |                  |          | Depression with anxiety                 |

|  |                               |
|--|-------------------------------|
|  | No difference                 |
|  | Decreased $\alpha$ -diversity |
|  | Increased $\alpha$ -diversity |
|  | Not measured                  |

**Figure S3.** Microbial  $\alpha$ -diversity in animal models of depression.

| Study                      | Diversity indexes |         |                 | Richness indexes |     | Other indexes    |          | Depression types                       |
|----------------------------|-------------------|---------|-----------------|------------------|-----|------------------|----------|----------------------------------------|
|                            | Shannon           | Simpson | Inverse Simpson | Chao-1           | ACE | Observed Species | Faith-PD |                                        |
| Abildgaard A et al. 2021   |                   |         |                 |                  |     |                  |          | FSL-depression                         |
| An Q et al. 2020           |                   |         |                 |                  |     |                  |          | CUMS-depression                        |
| Arsianova A et al. 2021    |                   |         |                 |                  |     |                  |          | Antibiotic-depression                  |
| Bharwani A et al. 2017     |                   |         |                 |                  |     |                  |          | CSDS-depression                        |
| Bridgewater LC et al. 2017 |                   |         |                 |                  |     |                  |          | HFD-depression male                    |
|                            |                   |         |                 |                  |     |                  |          | CUMS-depression female                 |
|                            |                   |         |                 |                  |     |                  |          | CUMS-depression male                   |
| Burokas A et al. 2017      |                   |         |                 |                  |     |                  |          | Prebiotics-anti-depression             |
| Chakraborti A et al. 2021  |                   |         |                 |                  |     |                  |          | CSDS-depression                        |
| Chen L et al. 2021         |                   |         |                 |                  |     |                  |          | HFCS-MFD-depression                    |
| Chen P et al. 2019         |                   |         |                 |                  |     |                  |          | LPS-depression                         |
| Chen T et al. 2021         |                   |         |                 |                  |     |                  |          | UCMS-depression                        |
| Chen X et al. 2022         |                   |         |                 |                  |     |                  |          | CRS-depression                         |
| Chen X et al. 2021         |                   |         |                 |                  |     |                  |          | FMT CRS-depression                     |
| Chen Y et al. 2021a        |                   |         |                 |                  |     |                  |          | Lead exposure-depression               |
| Chen Y et al. 2021b        |                   |         |                 |                  |     |                  |          | Lead exposure-depression               |
| Cheng D et al. 2018        |                   |         |                 |                  |     |                  |          | CUMS-depression                        |
| Cheng R et al. 2021        |                   |         |                 |                  |     |                  |          | CUMS-depression                        |
| Chevalier G et al. 2020    |                   |         |                 |                  |     |                  |          | Hydrocortisone-depression              |
| Chi L et al. 2020          |                   |         |                 |                  |     |                  |          | CUMS-depression                        |
| Deng Y et al. 2021         |                   |         |                 |                  |     |                  |          | UCMS-depression                        |
| Diviccaro S et al. 2019    |                   |         |                 |                  |     |                  |          | FMT-UCMS-depression                    |
| Donoso F et al. 2020       |                   |         |                 |                  |     |                  |          | CUMS-depression                        |
| Du HX et al. 2020          |                   |         |                 |                  |     |                  |          | CRS-depression                         |
| Duan J et al. 2021         |                   |         |                 |                  |     |                  |          | Finasteride-depression                 |
| Egerton S et al. 2020      |                   |         |                 |                  |     |                  |          | MS-depression                          |
| El Aidy S et al. 2017      |                   |         |                 |                  |     |                  |          | MS                                     |
| Fan L et al. 2021          |                   |         |                 |                  |     |                  |          | CUMS-depression                        |
| Feng Y et al. 2020         |                   |         |                 |                  |     |                  |          | CUMS-depression                        |
| Feng Z et al. 2020         |                   |         |                 |                  |     |                  |          | CMS-depression                         |
| Forouzan S et al. 2021     |                   |         |                 |                  |     |                  |          | METH-depression                        |
| Gao K et al. 2022          |                   |         |                 |                  |     |                  |          | CUMS-depression                        |
| Gao X et al. 2020          |                   |         |                 |                  |     |                  |          | CUMS-depression                        |
| Gong X et al. 2021         |                   |         |                 |                  |     |                  |          | CSDS-depression                        |
| Gu F et al. 2020           |                   |         |                 |                  |     |                  |          | CUMS-depression                        |
| Gu X et al. 2022           |                   |         |                 |                  |     |                  |          | PSD-depression                         |
| Guida F et al. 2018        |                   |         |                 |                  |     |                  |          | Antibiotic-depression                  |
| Guo Y et al. 2018          |                   |         |                 |                  |     |                  |          | CRS-depression                         |
| Guo Y et al. 2019          |                   |         |                 |                  |     |                  |          | CRS-depression                         |
| Han SK et al. 2020a        |                   |         |                 |                  |     |                  |          | IS/EC-depression                       |
| Han SK et al. 2020b        |                   |         |                 |                  |     |                  |          | EC-depression                          |
| Han SK et al. 2021         |                   |         |                 |                  |     |                  |          | RS-depression                          |
| Hao WZ et al. 2021         |                   |         |                 |                  |     |                  |          | FMT-RS-depression                      |
| Hassan AM et al. 2019      |                   |         |                 |                  |     |                  |          | CUMS-depression                        |
| Huang F et al. 2021        |                   |         |                 |                  |     |                  |          | HFD-depression                         |
| Huang N et al. 2019        |                   |         |                 |                  |     |                  |          | Ovariectomy-depression                 |
| Huang YJ et al. 2021       |                   |         |                 |                  |     |                  |          | LPS-depression                         |
| Huang YY et al. 2022       |                   |         |                 |                  |     |                  |          | sCSDS-depression                       |
| Insera A et al. 2019       |                   |         |                 |                  |     |                  |          | DSS-depression                         |
| Ji S et al. 2022           |                   |         |                 |                  |     |                  |          | (Casp1, Ingr, Nos2) KO anti-depression |
| Jiang W et al. 2021        |                   |         |                 |                  |     |                  |          | CUS-depression                         |
| Jiang Y et al. 2020        |                   |         |                 |                  |     |                  |          | CRS-depression                         |
| Jianguo L et al. 2019      |                   |         |                 |                  |     |                  |          | Post-stroke depression                 |
| Karen C et al. 2021        |                   |         |                 |                  |     |                  |          | Alcohol-depression                     |
| Kelly JR et al. 2016       |                   |         |                 |                  |     |                  |          | CUMS-depression                        |
| Kemp KM et al. 2021        |                   |         |                 |                  |     |                  |          | MS-depression                          |
| Kim JK et al. 2020         |                   |         |                 |                  |     |                  |          | ABX FMT-depression                     |
| Kim JK et al. 2021         |                   |         |                 |                  |     |                  |          | MS                                     |
| Knudsen JK et al. 2021     |                   |         |                 |                  |     |                  |          | EC-depression                          |
| Leclercq S et al. 2020     |                   |         |                 |                  |     |                  |          | IS-depression                          |
| Lee HC et al. 2020         |                   |         |                 |                  |     |                  |          | EC-depression                          |
| Li H et al. 2019           |                   |         |                 |                  |     |                  |          | FRL FMT-MDD-depression                 |
| Li H et al. 2021           |                   |         |                 |                  |     |                  |          | FMT-AD-depression                      |
| Li N et al. 2018           |                   |         |                 |                  |     |                  |          | Lard diet-depression                   |
| Li N et al. 2019           |                   |         |                 |                  |     |                  |          | CUMS-depression                        |
| Li P et al. 2021           |                   |         |                 |                  |     |                  |          | CUMS-depression                        |
| Lim EY et al. 2021         |                   |         |                 |                  |     |                  |          | CMS-depression                         |
| Lin S et al. 2021          |                   |         |                 |                  |     |                  |          | CUMS-depression                        |
| Liu QF et al. 2020         |                   |         |                 |                  |     |                  |          | CUMS-recipient -depression             |
| Liu X et al. 2021a         |                   |         |                 |                  |     |                  |          | CUMS-depression                        |
| Liu X et al. 2021b         |                   |         |                 |                  |     |                  |          | CUMS-depression                        |
| Luo X et al. 2021          |                   |         |                 |                  |     |                  |          | EMF-depression                         |
| Lv M et al. 2021           |                   |         |                 |                  |     |                  |          | CUMS-depression                        |
| Lv WJ et al. 2019          |                   |         |                 |                  |     |                  |          | CUMS-depression                        |
| Lv WJ et al. 2020          |                   |         |                 |                  |     |                  |          | DSS-depression                         |
| Ma W et al. 2019           |                   |         |                 |                  |     |                  |          | PSD-depression                         |
| Matsuda Y et al. 2020      |                   |         |                 |                  |     |                  |          | CSDS-depression                        |
| McGaughey KD et al. 2019   |                   |         |                 |                  |     |                  |          | CSDS-depression                        |

|       |                               |
|-------|-------------------------------|
| Grey  | No difference                 |
| Green | Decreased $\alpha$ -diversity |
| Red   | Increased $\alpha$ -diversity |
| White | Not measured                  |

(Continue)

| Study                           | Diversity indexes |         |                 | Richness indexes |     | Other indexes    |          | Depression types                      |
|---------------------------------|-------------------|---------|-----------------|------------------|-----|------------------|----------|---------------------------------------|
|                                 | Shannon           | Simpson | Inverse Simpson | Chao-1           | ACE | Observed Species | Faith-PD |                                       |
| Medina-Rodriguez EM et al. 2020 |                   |         |                 |                  |     |                  |          | LH-depression                         |
| Meng C et al. 2022              |                   |         |                 |                  |     |                  |          | CUMS-depression                       |
| Moya-Pérez A et al. 2017        |                   |         |                 |                  |     |                  |          | MS-depression                         |
| O'Mahony SM et al. 2020         |                   |         |                 |                  |     |                  |          | MS-depression                         |
| Patterson E et al. 2019         |                   |         |                 |                  |     |                  |          | HFD-depression                        |
| Pearson-Leary J et al. 2020     |                   |         |                 |                  |     |                  |          | CSDS-depression                       |
| Pu Y et al. 2021                |                   |         |                 |                  |     |                  |          | Chrna7 KO-depression                  |
| Qiao Y et al. 2020              |                   |         |                 |                  |     |                  |          | FMT-Chrma7 KO-depression              |
| Qu W et al. 2019                |                   |         |                 |                  |     |                  |          | CRS/CUMS-depression                   |
| Rao J et al. 2021               |                   |         |                 |                  |     |                  |          | CUMS-depression                       |
| Ray P et al. 2021               |                   |         |                 |                  |     |                  |          | CUMS-depression                       |
| Robertson RC et al. 2017        |                   |         |                 |                  |     |                  |          | Vancomycin-depression                 |
| Schmidtnr AK et al. 2019        |                   |         |                 |                  |     |                  |          | n-3 PUFA deficiency-depression        |
| Shan B et al. 2021              |                   |         |                 |                  |     |                  |          | HAB-depression                        |
| Shao S et al. 2021              |                   |         |                 |                  |     |                  |          | CUS-depression                        |
| Sheng L et al. 2021             |                   |         |                 |                  |     |                  |          | CRS-depression                        |
| Siopi E et al. 2020             |                   |         |                 |                  |     |                  |          | CUMS-depression                       |
| Song J et al. 2019b             |                   |         |                 |                  |     |                  |          | UCMS-depression                       |
| Song XJ et al. 2021             |                   |         |                 |                  |     |                  |          | FMT-UCMS-depression                   |
| Sovijit WN et al. 2019          |                   |         |                 |                  |     |                  |          | ACTH-depression                       |
| Sun L et al. 2019a              |                   |         |                 |                  |     |                  |          | CUMS-depression                       |
| Sun X et al. 2021               |                   |         |                 |                  |     |                  |          | CUMS-depression                       |
| Sun Y et al. 2019               |                   |         |                 |                  |     |                  |          | CRS-depression                        |
| Sun Y et al. 2020               |                   |         |                 |                  |     |                  |          | CUMS-depression                       |
| Szyszkowicz JK et al. 2017      |                   |         |                 |                  |     |                  |          | LPS-depression                        |
| Takahashi E et al. 2021a        |                   |         |                 |                  |     |                  |          | CSDS-depression                       |
| Takahashi E et al. 2021b        |                   |         |                 |                  |     |                  |          | CSDS-depression                       |
| Teng T et al. 2021              |                   |         |                 |                  |     |                  |          | AIN-93G-depression                    |
| Tian P et al. 2019a             |                   |         |                 |                  |     |                  |          | CRS-depression                        |
| Tian P et al. 2020              |                   |         |                 |                  |     |                  |          | CUMS-depression                       |
| Tian P et al. 2019b             |                   |         |                 |                  |     |                  |          | CUMS-depression                       |
| Tian XY et al. 2021             |                   |         |                 |                  |     |                  |          | CRS-depression                        |
| Tillmann S et al. 2019          |                   |         |                 |                  |     |                  |          | IS-postpartum depression              |
| Wang L et al. 2020              |                   |         |                 |                  |     |                  |          | FSL-depression                        |
| Wang L et al. 2021              |                   |         |                 |                  |     |                  |          | CUMS-depression                       |
| Wang Q et al. 2019              |                   |         |                 |                  |     |                  |          | CUMS-depression female                |
| Wang R et al. 2021              |                   |         |                 |                  |     |                  |          | CUMS-depression male                  |
| Wang S et al. 2020a             |                   |         |                 |                  |     |                  |          | CMS-depression                        |
| Wang S et al. 2020b             |                   |         |                 |                  |     |                  |          | CRS-depression                        |
| Wang SM et al. 2021             |                   |         |                 |                  |     |                  |          | FMT CSDS-depression                   |
| Wang Y et al. 2021              |                   |         |                 |                  |     |                  |          | Microbe-depression                    |
| Warda AK et al. 2019            |                   |         |                 |                  |     |                  |          | CSDS-depression                       |
| Wei LN et al. 2019              |                   |         |                 |                  |     |                  |          | FMT CSDS-depression WT mice           |
| Wu F et al. 2020                |                   |         |                 |                  |     |                  |          | FMT CSDS-depression Ephx2 KO mice     |
| Wu J et al. 2021                |                   |         |                 |                  |     |                  |          | LPS-depression                        |
| Wu M et al. 2020                |                   |         |                 |                  |     |                  |          | ADR-159-depression                    |
| Xa J et al. 2021                |                   |         |                 |                  |     |                  |          | CUMS-depression                       |
| Xiao Q et al. 2020              |                   |         |                 |                  |     |                  |          | HFD-depression                        |
| Xie R et al. 2020a              |                   |         |                 |                  |     |                  |          | CUMS-depression                       |
| Xie R et al. 2020b              |                   |         |                 |                  |     |                  |          | CRS-depression                        |
| Xu J et al. 2022                |                   |         |                 |                  |     |                  |          | LPS-depression                        |
| Xu M et al. 2022                |                   |         |                 |                  |     |                  |          | CRS-depression                        |
| Xu Z et al. 2019                |                   |         |                 |                  |     |                  |          | LPS-depression                        |
| Xue M et al. 2021               |                   |         |                 |                  |     |                  |          | CRS-depression                        |
| Yan T et al. 2020               |                   |         |                 |                  |     |                  |          | CSDS-depression                       |
| Yan T et al. 2021               |                   |         |                 |                  |     |                  |          | CUMS-depression                       |
| Yang C et al. 2019              |                   |         |                 |                  |     |                  |          | LPS-depression                        |
| Yang HL et al. 2021             |                   |         |                 |                  |     |                  |          | SNI-depression                        |
| Yang Q et al. 2020              |                   |         |                 |                  |     |                  |          | FMT SNI susceptible-depression        |
| Yu M et al. 2020                |                   |         |                 |                  |     |                  |          | CRS-depression                        |
| Yun SW et al. 2020              |                   |         |                 |                  |     |                  |          | CUMS-depression                       |
| Yun SW et al. 2021              |                   |         |                 |                  |     |                  |          | CVS-depression                        |
| Zhang F et al. 2020             |                   |         |                 |                  |     |                  |          | EC-depression                         |
| Zhang J et al. 2020             |                   |         |                 |                  |     |                  |          | EC-depression                         |
| Zhang K et al. 2019             |                   |         |                 |                  |     |                  |          | 5-Fu-depression                       |
| Zhang L et al. 2021             |                   |         |                 |                  |     |                  |          | LPS-depression                        |
| Zhang W et al. 2021             |                   |         |                 |                  |     |                  |          | LPS-depression                        |
| Zhang Y et al. 2021             |                   |         |                 |                  |     |                  |          | LH-depression                         |
| Zhang Z et al. 2021             |                   |         |                 |                  |     |                  |          | CUMS-depression                       |
| Zhang Z et al. 2022             |                   |         |                 |                  |     |                  |          | CUMS-depression                       |
| Zhang Z et al. 2020             |                   |         |                 |                  |     |                  |          | CUMS-depression                       |
| Zhao B et al. 2020              |                   |         |                 |                  |     |                  |          | Offspring of prenatal IS-depression   |
| Zhao F et al. 2021              |                   |         |                 |                  |     |                  |          | CRS-depression                        |
| Zhao W et al. 2019              |                   |         |                 |                  |     |                  |          | CRS-depression                        |
| Zhao Z et al. 2020              |                   |         |                 |                  |     |                  |          | DSS-depression                        |
| Zheng P et al. 2020             |                   |         |                 |                  |     |                  |          | CUMS-depression                       |
| Zhou H et al. 2022              |                   |         |                 |                  |     |                  |          | CUMS-depression                       |
| Zhu HZ et al. 2019              |                   |         |                 |                  |     |                  |          | Offspring of prenatal CUMS-depression |

|  |                               |
|--|-------------------------------|
|  | No difference                 |
|  | Decreased $\alpha$ -diversity |
|  | Increased $\alpha$ -diversity |
|  | Not measured                  |

Figure S4. PRISMA flowchart for microbiota-based interventions of depression.

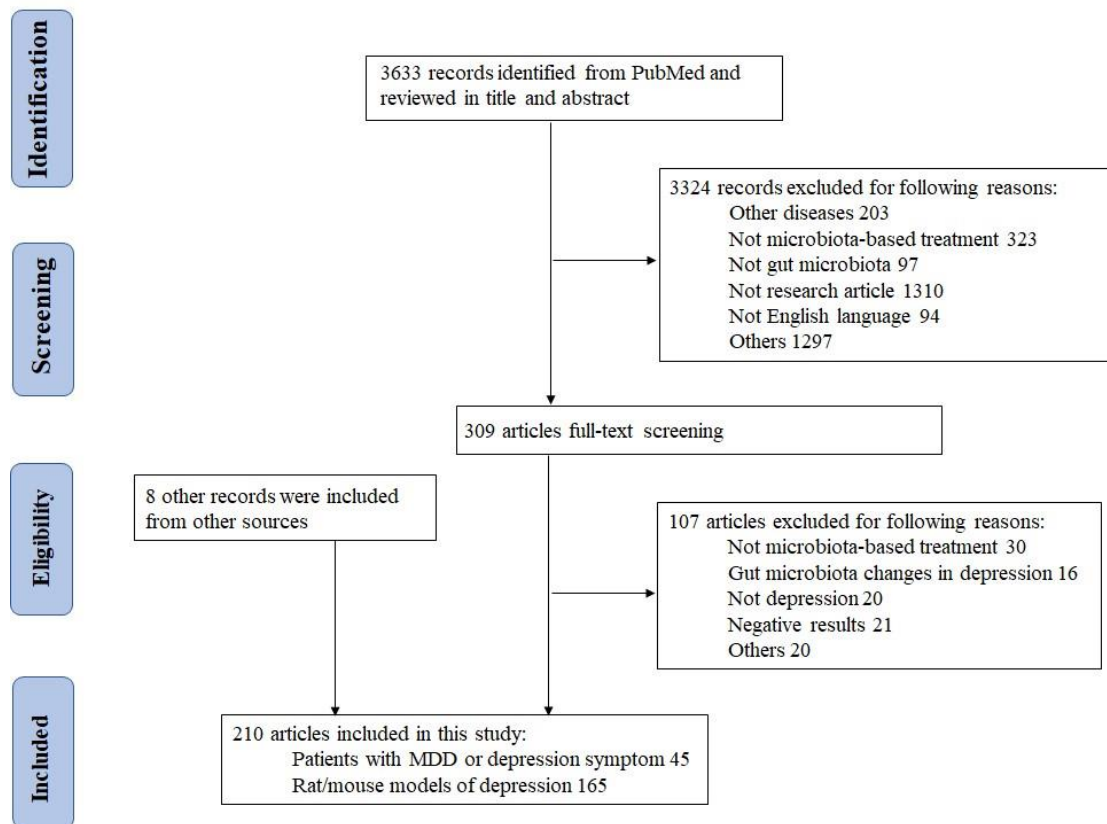

Supplement: ADVS-9-2203707-s002.pdf [file ADVS-9-2203707-s002.pdf]
