# Supplementary material for: Toward a Deeper Understanding of Gut Microbiome in Depression: The Promise of Clinical Applicability
Source: PubMed Central journal article supplement (PMC9762301; doi:10.1002/advs.202203707), 2022-10-26
Supplement: ADVS-9-2203707-s003.pdf [file ADVS-9-2203707-s003.pdf]

## Supporting Information

for *Adv. Sci.*, DOI 10.1002/adv.202203707

Toward a Deeper Understanding of Gut Microbiome in Depression: The Promise of Clinical Applicability

*Lanxiang Liu, Haiyang Wang, Hanping Zhang, Xueyi Chen, Yangdong Zhang, Ji Wu, Libo Zhao, Dongfang Wang, Juncai Pu, Ping Ji and Peng Xie\**

Supplementary Tables

**Towards a deeper understanding of gut microbiome in depression:  
the promise of clinical applicability**

*Lanxiang Liu<sup>1,3,4</sup>†, Haiyang Wang<sup>2,3</sup>†, Hanping Zhang<sup>3,4</sup>†, Xueyi Chen<sup>3</sup>, Yangdong Zhang<sup>3,4</sup>, Ji Wu<sup>3,4</sup>, Libo Zhao<sup>1</sup>, Dongfang Wang<sup>3</sup>, Juncai Pu<sup>3,4</sup>, Ping Ji<sup>2</sup>, Peng Xie<sup>1,2,3,4</sup>\**

**Table S1.** Characteristics of studies investigating gut microbiota composition in patients with depression.

**Table S2.** Characteristics of studies investigating gut microbiota composition in animal models of depression.

**Table S3.** Microbiota  $\beta$ -diversity in patients with depression.

**Table S4.** Microbial  $\beta$ -diversity in animal models of depression.

**Table S5.** Commensal microbiota alterations at Phylum, Class, Order, and Family levels in patients with depression.

**Table S6.** Commensal microbiota alterations at Genus level in patients with depression.

**Table S7.** Commensal microbiota alterations at Species level in patients with depression.

**Table S8.** Commensal microbiota alterations at Phylum, Class, Order, and Family levels in animal models of depression.

**Table S9.** Commensal microbiota alterations at Genus level in animal models of depression.

**Table S10.** Commensal microbiota alterations at Species level in animal models of depression.

**Table S11.** Characteristics of studies investigating the efficiency of gut microbiotabased therapeutics in patients with depression.

**Table S12.** Characteristics of studies investigating the efficiency of gut microbiotabased therapeutics in animal models of depression.

**Table S13.** A summary of probiotics that alleviate depression symptoms.

**Table S14.** Search strategy for electronic databases.

**Table S15.** Search strategy for microbiota-based interventions of depression from PubMed.

**Table S1.** Characteristics of studies investigating gut microbiota composition in patients with depression.

| Study                               | People     | Study design | groups                                                                                            | Age (Years) (mean±SD)<br>Patients<br>Control                    | Sex (M/F)<br>Patients<br>Control   | BMI<br>Patients<br>Control                                   | Comorbidity                                                                                                  | Drug treatment in patients                                            | Diagnostic criteria  | Severity measure | Severity (mean±SD)<br>Patients<br>Control                 | Sample        | Storage        | Gut microbiome estimation                        | Sequencing region | Microbial biomarkers from comparisons                | Microbial biomarkers selection                                                                                                                                              |
|-------------------------------------|------------|--------------|---------------------------------------------------------------------------------------------------|-----------------------------------------------------------------|------------------------------------|--------------------------------------------------------------|--------------------------------------------------------------------------------------------------------------|-----------------------------------------------------------------------|----------------------|------------------|-----------------------------------------------------------|---------------|----------------|--------------------------------------------------|-------------------|------------------------------------------------------|-----------------------------------------------------------------------------------------------------------------------------------------------------------------------------|
| Aizawa E et al. 2016 <sup>11</sup>  | Japanese   | Case-control | MDD (N=43)<br>Control (N=57)                                                                      | 39.4(10.0)<br>42.8(12.7)                                        | 25/18<br>22/35                     | 23.2(3.6)<br>22.3(3.7)                                       | In MDD: 14 IBS;<br>In controls: 7 IBS                                                                        | In MDD: 28 Imipramine                                                 | DSM-IV               | HAMD-21          | 16.9(6.8)<br>NA                                           | Fecal samples | -4°C and -80°C | RT-qPCR for Bifidobacterium and Lactobacillus    | NA                | MDD and Controls                                     | MannWhitney U test: p < 0.05                                                                                                                                                |
| Bai S et al. 2021 <sup>12</sup>     | Chinese    | Case-control | MDD (N=60)<br>Control (N=60)                                                                      | 35.62(17.10)<br>35.13(15.79)                                    | 21/39<br>24/36                     | 20.90(2.30)<br>21.19(4.29)                                   | NA                                                                                                           | NA                                                                    | DSM-IV, HAMD-17 > 17 | HAMD-17          | 25.36(0.01)<br>0.67(0.93)                                 | Fecal samples | -80°C          | 16S rRNA gene sequencing-Illumina MiSeq platform | V3-V4             | MDD and Controls                                     | LEfSe: p < 0.05 and LDA > 2.0                                                                                                                                               |
| Bai S et al. 2022 <sup>13</sup>     | Chinese    | Case-control | MDD (N=56)<br>Control (N=56)                                                                      | 35.11(16.79)<br>35.71(15.99)                                    | 18/38<br>20/36                     | 20.94(2.37)<br>21.23(4.27)                                   | NA                                                                                                           | NA                                                                    | DSM-IV-TR            | HDRS             | 24.86(5.94)<br>0.71(0.95)                                 | Fecal samples | -80°C          | 16S rRNA gene sequencing-Illumina MiSeq platform | V3-V4             | MDD and Controls                                     | LEfSe: p < 0.05 and LDA > 2.0                                                                                                                                               |
| Cao JR et al. 2021 <sup>14</sup>    | Spanish    | Case-control | Active MDD (N=46)<br>Remission MDD (N=22)<br>Control (N=45)                                       | 42.1<br>45.85<br>44.72                                          | 10/36<br>5/17<br>11/34             | -                                                            | -                                                                                                            | -                                                                     | DSM-IV-TR, HDRS≥14   | HDRS             | 21.17<br>10.54<br>0.08                                    | Fecal samples | -80°C          | 16S rRNA gene sequencing-Illumina MiSeq platform | V3-V4             | Active MDD and Controls                              | Kruskal-Wallis test followed by Bonferroni-adjusted analysis: p < 0.05                                                                                                      |
| Chahwan B et al. 2019 <sup>15</sup> | Australian | Case-control | Depression (N=71) (N=68 provided stool samples)<br>Controls (N=20)                                | 36.05(11.99)<br>35.95(11.74)                                    | 22/49<br>5/15                      | -                                                            | -                                                                                                            | In depression: 38 Antidepressant, 46 Psychological treatment          | DSM-IV MINI; ICD-10  | BDI-II           | 28.43 (9.90)<br>2.80 (2.78)                               | Fecal samples | -80°C          | 16S rRNA gene sequencing-Illumina MiSeq platform | V3-V4             | Clinical/Subclinical Depression and Controls         | Kruskal Wallis test with the False Discovery Rate (FDR) correction: adjusted p < 0.05 Spearman's Correlations (with FDR correction for multiple testing): adjusted p < 0.05 |
| Chen DL et al. 2021 <sup>16</sup>   | Chinese    | Case-control | UC (N=31)<br>UC with depression (N=31)<br>Control (N=31)                                          | 44.16(11.49)<br>41.94(13.42)<br>43.13(10.98)                    | 17/14<br>16/15<br>16/15            | 22.8(1.9)<br>22.1(2.1)<br>22.4(2.6)                          | ulcerative colitis                                                                                           | NA                                                                    | SDS≥53               | SDS              | -                                                         | Fecal samples | -80°C          | 16S rRNA gene sequencing-pyrosequencing          | V3-V4             | UC with depression and Controls                      | ANOVA: p < 0.05                                                                                                                                                             |
| Chen JJ et al. 2018 <sup>17</sup>   | Chinese    | Case-control | MDD-female (N=24)<br>control-female(N=24)<br><br>MDD-male (N=20)<br>control-male(N=20)            | 41.5(11.53)<br>43.95(12.11)<br><br>40.35(11.05)<br>42.80(15.13) | 0/24<br>0/24<br><br>20/0<br>20/0   | 22.01(2.17)<br>22.63(2.43)<br><br>22.22(2.18)<br>22.50(2.25) | 3 female patients had coexisting anxiety disorders.<br><br>2 male patients had coexisting anxiety disorders. | -                                                                     | DSM-IV               | HDRS-17          | 23.04(4.93)<br>-<br><br>23.9(3.68)<br>-                   | Fecal samples | -80°C          | 16S rRNA gene sequencing-Roche 454 sequencing    | V3-V5             | Female and male MDD and corresponding controls       | LEfSe: p < 0.05 and LDA > 2.0                                                                                                                                               |
| Chen JJ et al. 2020 <sup>18</sup>   | Chinese    | Case-control | MDD-young(N=25)<br>control-young(N=27)<br><br>MDD-middle-aged (N=45)<br>control-middle-aged(N=44) | 24.0(3.74)<br>24.96(2.31)<br><br>44.96(7.76)<br>47.16(8.07)     | 7/18<br>8/19<br><br>14/31<br>10/34 | 22.13(2.24)<br>21.53(2.37)<br><br>22.64(2.64)<br>23.23(2.33) | NA                                                                                                           | In young MDD: 7 medications<br><br>In middle-aged MDD: 14 medications | DSM-IV               | HDRS-17          | 22.64(3.18)<br>0.29(0.61)<br><br>23.0(4.61)<br>0.34(0.74) | Fecal samples | -80°C          | 16S rRNA gene sequencing-Roche 454 sequencing    | V3-V5             | Young and middle-aged MDD and corresponding controls | LEfSe: p < 0.05 and LDA > 2.0                                                                                                                                               |
| Chen T et al. 2021 <sup>19</sup>    | Chinese    | Case-control | UC with depression (N=16)<br>UC (n=19)                                                            | 41.31(12.2)<br>43.68(12.73)                                     | 7/9<br>10/9                        | 22.49(2.64)<br>21.08(3.44)                                   | Ulcerative colitis (UC)                                                                                      | NA                                                                    | PHQ-9;10             | PHQ-9            | 13.75(3.96)<br>2.26(1.35)                                 | Fecal samples | -              | qRT-PCR for Akkermansia muciniphila              | NA                | UC with depression and UC                            | One-way analysis of variance (ANOVA) with Tukey-Kramer test: p < 0.05                                                                                                       |

|                                       |                |                              |                                                                                            |                                                              |                     |                                           |                                                                                                      |                                                                                                                                                |                                   |         |                                  |                    |        |                                                                                                              |                 |                                                                                                      |                                                                                    |
|---------------------------------------|----------------|------------------------------|--------------------------------------------------------------------------------------------|--------------------------------------------------------------|---------------------|-------------------------------------------|------------------------------------------------------------------------------------------------------|------------------------------------------------------------------------------------------------------------------------------------------------|-----------------------------------|---------|----------------------------------|--------------------|--------|--------------------------------------------------------------------------------------------------------------|-----------------|------------------------------------------------------------------------------------------------------|------------------------------------------------------------------------------------|
| Chen Y et al. 2021 <sup>[50]</sup>    | English        | Cross-sectional associations | Depression (N=113693)                                                                      | 56.23                                                        | 51162/62<br>531     | --                                        | --                                                                                                   | --                                                                                                                                             | PHQ-9                             | PHQ-9   | 2.71 (3.64)                      | Fecal samples      | --     | 16S rRNA gene sequencing-Illumina HiSeq platform                                                             | V4              | Cross-sectional associations with depression symptom measures                                        | Linear regression model: p < 0.05                                                  |
| Chen YH et al. 2021 <sup>[51]</sup>   | Chinese        | Case-control                 | MDD-female (N=62)<br>Control-female(N=46)<br><br>MDD-female (N=20)<br>Control-female(N=21) | 39.58 (12.66)<br>36.93(8.58)                                 | 0/62<br>0/46        | 21.99(2.93)<br>22.24(2.92)                | NA                                                                                                   | In MDD: 26 Antidepressants for a short period of time<br><br>--                                                                                | DSM-5<br>HAM-D-17:18              | HAMD-17 | 27.97(4.63)<br>NA                | Fecal samples      | -80°C  | 16S rRNA gene sequencing-Illumina MiSeq platform<br><br>Shotgun metagenomic sequencing-Illumina NovaSeq 6000 | V3-V4<br><br>NA | MDD and Controls                                                                                     | LEIS: p < 0.05 and LDA > 2.4<br>Wilcoxon test followed by FDR correction: p < 0.05 |
| Chen Z et al. 2018 <sup>[52]</sup>    | Chinese        | Case-control                 | MDD (N=10)<br>Control (N=10)                                                               | 43.9(13.8)<br>39.6 (9)                                       | 5/5<br>5/5          | 23.5(2.0)<br>22.6(1.5)                    | NA                                                                                                   | In MDD: 2 SSRIs or SNRIs treatment                                                                                                             | DSM-IV<br>HAM-D-17:20             | HAMD-17 | 25.6(4.7)<br>NA                  | Fecal samples      | -80 °C | Metaproteomics: phylogenetic analysis of bacterial peptides                                                  | NA              | MDD and Controls                                                                                     | Mann-Whitney test: p < 0.05 and fold change >1.5                                   |
| Cheng S et al. 2020 <sup>[53]</sup>   | European       | Cross-sectional associations | MDD (N=135458)<br>Control (N=344901)                                                       | --                                                           | --                  | --                                        | --                                                                                                   | --                                                                                                                                             | DSM-III, DSM-IV, ICD-9, or ICD-10 | --      | --                               | Fecal samples      | --     | Microbiota-related gene set enrichment analysis (GSEA)-Illumina MiSeq Illumina HiSeq2000 Illumina HiSeq      | --              | Cross-sectional associations between MDD and gut microbiota using published GWAS data                | Unspecified                                                                        |
| Chung YE et al. 2019 <sup>[54]</sup>  | Chinese        | Case-control                 | MDD (N=36)<br>Control (N=37)                                                               | 45.83 (14.08)<br>41.19 (12.73)                               | 8/28<br>14/23       | 22.80 (4.21)<br>23.95(3.92)               | NA                                                                                                   | In MDD: 31 Antidepressant use                                                                                                                  | DSM-5                             | BDI     | 19.18 (12.47)<br>4.54 (4.85)     | Fecal samples      | -80 °C | 16S rRNA gene sequencing-Illumina MiSeq/MiniSeq platforms                                                    | V3-V4/V4        | MDD and Controls                                                                                     | Analysis of composition of microbiomes (ANCOM): p < 0.05                           |
| Coccan D et al. 2021 <sup>[55]</sup>  | French         | Case-control                 | MDD (N=56)<br>Control (N=56)                                                               | 41.9(11.6)<br>41.9(12.7)                                     | 18/38<br>17/39      | 24(5.3)<br>--                             | In MDD: 3 Diabetes                                                                                   | Antidepressant-free for at least 1 year at baseline<br>Longitudinal intervention in MDD: 25 Venlafaxine; 19 Citalopram; 12 Escitalopram        | DSM-IV-TR<br>MINI<br>HDRS-17≥18   | HDRS-17 | --                               | Plasma sample      | -80°C  | 16S rRNA gene sequencing-MiSeq technology (Vaiomer,Labège, France)                                           | V3-V4           | MDD and Controls (baseline)                                                                          | LEIS: p < 0.05 and LDA > 2.0                                                       |
| Dong Z et al. 2021 <sup>[56]</sup>    | Chinese        | Case-control                 | MDD (N=23)<br>GAD (N=21)<br>Control (N=10)                                                 | 30.04(5.90)<br>30.43(7.95)<br>30.22(6.50)                    | 7/16<br>7/14<br>4/6 | 21.87(3.00)<br>21.19(2.89)<br>21.45(2.80) | NA                                                                                                   | NA                                                                                                                                             | DSM-5<br>HAM-D-24 ≥20             | HAMD-24 | 29.26(7.51)<br>12.10(5.25)<br>NA | Fecal samples      | -80°C  | 16S rRNA gene sequencing-Illumina MiSeq platform                                                             | V3-V4           | MDD and Controls                                                                                     | ANOVA: p < 0.05                                                                    |
| Fontana A et al. 2020 <sup>[57]</sup> | Italian        | Case-control                 | MDD (N=34)<br>Control (N=20)                                                               | 55.58(43.3-61.6)<br>37.7(30.6-58.0)                          | 10/24<br>13/7       | 23.96(21.0-28.8)<br>22.7 (21.2-23.8)      | In MDD: 8 Cardiometabolic comorbidities;<br>In controls: 4 Cardiometabolic comorbidities             | In MDD: 12 SSRI; 15 SNRI/TCA/Serotonin modulator; 7 Mood stabilizers;<br>7 Antipsychotics; 11 Any concomitant drugs                            | DSM IV-TR                         | --      | --                               | Fecal samples      | -80°C  | 16S rRNA gene sequencing-Illumina MiSeq platform                                                             | V3-V4           | MDD (treatment responsive, treatment-resistant and untreated at the moment of sampling) and controls | Two-sample t-test and Mann-Whitney U test: p < 0.05                                |
| Heym N et al. 2019 <sup>[58]</sup>    | English        | Cross-sectional associations | Depression(N=40)                                                                           | 36.38(11.43)<br>male:36.77(13.24)<br>female:<br>36.19(10.72) | 13/27               | --                                        | --                                                                                                   | 7 patients: contraceptives; 3 patients:blood pressure and statins; 1 patient:thyroid; 1 patient:stomach acid; 1 patient:acne; 1 patient:asthma | BDI-II                            | BDI-II  | --                               | Fecal samples      | -20 °C | 16S rRNA-targeted oligonucleotide probes for Bif164 (bifidobacteria) and Lab158 (lactobacilli)               | --              | Psychological risk and resilience factors for depression                                             | Pearson's zero-order correlations                                                  |
| Hoggard M et al. 2018 <sup>[59]</sup> | New Zealanders | Cross-sectional associations | Chronic rhinosinusitis (N=14)<br>Control (N=12)                                            | 59.5(29-74)<br>41.5(21-76)                                   | 8/6<br>2/10         | --                                        | In CRS: 14 chronic rhinosinusitis, 6 Asthma, 3 Diabetes, 3 GERD, 12 Allergy (medications), 7 Allergy | In CRS: 3 antibiotics, 3 systemic corticosteroids, 6 topical corticosteroids;                                                                  | --                                | PHQ-9   | 6(0-12)<br>4.5(0-11)             | Simonasal swab and | --     | 16S rRNA gene sequencing-Illumina MiSeq platform                                                             | Unspecified     | Cross-sectional associations with depression symptom measures                                        | Spearman correlation and linear regression analysis                                |

|                                        |          |                              |                                                                                                            |                                                 |                             |                                        |                                                                                                                                                               |                                                                                                  |                                           |                  |                                              |               |        |                                                                                                                                                |             |                                                               |                                                                       |
|----------------------------------------|----------|------------------------------|------------------------------------------------------------------------------------------------------------|-------------------------------------------------|-----------------------------|----------------------------------------|---------------------------------------------------------------------------------------------------------------------------------------------------------------|--------------------------------------------------------------------------------------------------|-------------------------------------------|------------------|----------------------------------------------|---------------|--------|------------------------------------------------------------------------------------------------------------------------------------------------|-------------|---------------------------------------------------------------|-----------------------------------------------------------------------|
|                                        |          |                              |                                                                                                            |                                                 |                             |                                        | (other), 4 Polyposis; Control: 2 Asthma, 1 Diabetes, 6 Allergy (medications), 6 Allergy (other)                                                               | Control: 1 antibiotics, 1 systemic corticosteroids, 4 topical corticosteroids                    |                                           |                  |                                              | mucus samples |        |                                                                                                                                                |             |                                                               |                                                                       |
| Huang Y et al. 2018 <sup>[20]</sup>    | Chinese  | Case-control                 | MDD (N=27)<br>Control (N=27)                                                                               | 48.7(12.8)<br>42.3(14.1)                        | 7/20<br>7/20                | 23.8(2.8)<br>23.4(2.9)                 | NA                                                                                                                                                            | NA                                                                                               | ICD-10                                    | --               | --                                           | Fecal samples | -80-C  | 16S rRNA gene sequencing-Illumina Hiseq2500                                                                                                    | V3-V4       | First episode MDD and Controls                                | LEIS: p < 0.01 and LDA > 2.0                                          |
| Huang Y et al. 2021 <sup>[21]</sup>    | Chinese  | Case-control                 | Stroke+ affective disorder (N=20)<br>Stroke+cognitive impairment (N=29)<br>Stroke (N=27)<br>Control (N=19) | 61.6(11.37)<br>62.76(9.01)<br>62.19(8.75)<br>NA | 11/9<br>20/9<br>14/13<br>NA | --                                     | In PSTD: 9 Hypertension, 5 Diabetes<br>In PSCI: 17 Hypertension, 9 Diabetes<br>In ST: 12 Hypertension, 4 Diabetes                                             | --                                                                                               |                                           | Depress on score | 7.05(2.87)<br>1.52(1.27)<br>2.26(1.81)<br>NA | Fecal samples | -80-C  | 16S rRNA gene sequencing-Illumina MSeq platform                                                                                                | V3-V4       | Stroke+affective disorder and stroke control                  | LEIS: p < 0.05 and LDA > 2.0                                          |
| Ishii W et al. 2019 <sup>[22]</sup>    | Japanese | Case-control                 | Depression-OI (N=15)<br>Nondepression-OI (N=41)<br>Control (N=9)                                           | 13.6(1.6)*<br>12.3(3.8)                         | 21/35*<br>3/6               | 18.8(2.9)*<br>18.0(2.2)                | 56 Orthostatic Intolerance; 33 Anxiety                                                                                                                        | NA                                                                                               | CDE:22                                    | CDI              | ≥22                                          | Fecal samples | -80-C  | 16S rRNA gene-Terminal-restriction fragment length polymorphism (T-RFLP)                                                                       | --          | Orthostatic Intolerance with depression and controls          | Mann-Whitney test and Kruskal-Wallis test: p<0.017                    |
| Jackson MA et al. 2018 <sup>[23]</sup> | English  | Cross-sectional associations | Depression(N=354) from all individuals(N=2737)                                                             | 60(12)*                                         | 301/2436                    | 26 (5)*                                | 38 diseases(e.g., hypercholesterolaemia, respiratory allergies, anxiety, osteoarthritis, and hypertension)                                                    | 51 prescription medications(e.g., statins, proton pump inhibitors, cholecalciferol, and calcium) | --                                        | --               | --                                           | Fecal samples | -80 °C | 16s rRNA gene sequencing-Illumina MSeq platform                                                                                                | V4          | Cross-sectional associations with depression symptom measures | Beta coefficients of associations: p < 0.05                           |
| Jiang H et al. 2015 <sup>[24]</sup>    | Chinese  | Case-control                 | MDD-active (N=29)<br>MDD-responded (N=17)<br>Control (N=30)                                                | 25.3 (5.4)<br>27.1 (5.4)<br>26.8 (5.4)          | 18/11<br>9/8<br>15/15       | 20.3 (3.4)<br>21.8 (3.4)<br>19.6 (3.4) | --                                                                                                                                                            | In MDD: 38 SSRIs or SNRIs, 12 Atypical antipsychotic, 34 Benzodiazepines                         | DSM-IV<br>HAMDS-24≥20                     | HAMDS<br>-24     | 29.8 (7.6)<br>8.3 (4.6)<br>NA                | Fecal samples | -80-C  | 16S rRNA gene sequencing-Roche 454 sequencing                                                                                                  | V1-V3       | Active-MDD, Responding MDD and Controls                       | LEIS: p < 0.05 and LDA > 2.0                                          |
| Jiang HY et al. 2020 <sup>[25]</sup>   | Chinese  | Case-control                 | CDE(N=24)<br>Control (N=16)                                                                                | 37.2(7.2)<br>35.8(6.8)                          | 13/11<br>9/7                | 23.6(7.1)<br>22.3(6.5)                 | --                                                                                                                                                            | In CDE: 11 Antidepressant; 16 Benzodiazepines; 9 Atypical antipsychotic; 7 Mood stabilizer       | DSM-IV                                    | HAMDS<br>-24     | 25.3(6.8)<br>2.3(1.1)                        | Fecal samples | -80-C  | 16S rRNA gene sequencing-Illumina MSeq platform                                                                                                | V3-V4       | Patients with current depressive episode (CDE) and controls   | LEIS: p < 0.05 and LDA > 2.0                                          |
| Kang Y et al. 2021 <sup>[26]</sup>     | Chinese  | Case-control                 | Post-stroke depression (N=67)<br>Stroke (N=96)                                                             | 55.9(18.61)                                     | 85/78                       | --                                     | Stroke                                                                                                                                                        | NA                                                                                               | CCMD-3,<br>HAMD-24: 8,<br>SDS index ≥ 0.5 | --               | --                                           | Fecal samples | --     | Enterococcus faecalis, Escherichia coli and Bifidobacterium in feces were detected by ATB-expression semi-automatic microbial detection system | --          | Post-stroke depression and stroke                             | Independent sample t-test: p < 0.05                                   |
| Kelly JR et al. 2016 <sup>[27]</sup>   | Irish    | Case-control                 | MDD (N=34)<br>Control (N=33)                                                                               | 45.8(11.5)<br>45.8(11.9)                        | 21/13<br>19/14              | 26.2(4.5)<br>24.58(2.7)                | 7 patients: Dyslipidaemia, 3 patients: Hypertension, 5 patients: BPAD II, 4 patients: Anxiety disorder<br>4 patients: Dyslipidaemia, 3 patients: Hypertension | All patients:SSRIs                                                                               | DSM-IV MINI                               | HAMD-17          | 19.5 (14)<br>NA                              | Fecal samples | -80-C  | 16S rRNA gene sequencing Illumina Mseq platform                                                                                                | Unspecified | MDD and Controls                                              | Mann-Whitney U test and Benjamini-Hochberg FDR-adjusted p-value ≤ 0.1 |

|                                         |          |                              |                                                                               |                                                      |                                |                                                  |                                                                                                                                               |                                                                                                     |                                              |                                |                                          |               |       |                                                                                                                              |                 |                                                                       |                                                                                                        |
|-----------------------------------------|----------|------------------------------|-------------------------------------------------------------------------------|------------------------------------------------------|--------------------------------|--------------------------------------------------|-----------------------------------------------------------------------------------------------------------------------------------------------|-----------------------------------------------------------------------------------------------------|----------------------------------------------|--------------------------------|------------------------------------------|---------------|-------|------------------------------------------------------------------------------------------------------------------------------|-----------------|-----------------------------------------------------------------------|--------------------------------------------------------------------------------------------------------|
| Kleiman SC et al. 2015 <sup>20</sup>    | American | Cross-sectional associations | Anorexia Nervosa (N=16)<br>Control (N=12)                                     | 28.0 (±11.7)<br>29.8 (11.6)                          | 0/16<br>0/12                   | 16.2 (1.5)<br>21.5 (1.9)                         | NA                                                                                                                                            | NA                                                                                                  | --                                           | BDI                            | 26.6 (13.4)<br>NA                        | Fecal samples | ~80-C | 16S rRNA gene sequencing-454 Life Sciences Genome Sequencer FLX machine                                                      | V1-V3           | Cross-sectional associations with depression symptom measures         | Wilcoxon matched pairs rank test (-2 ≤ skewness ≤ 2) or the sign test (skewness ≤ -2 or ≥ 2); p < 0.05 |
| Kurokawa S et al. 2018 <sup>21</sup>    | Japanese | Case-control                 | IBS with depression (N=12)<br>IBS without depression (N=5)<br>Donors (N=17)   | 43.41(10.75)<br>51.41(18.11)                         | 8/9<br>7/10                    | --                                               | IBS                                                                                                                                           | NA                                                                                                  | HAMD≥8                                       | HAMD-                          | --                                       | Fecal samples | ~80-C | 16S rRNA gene sequencing-Illumina MiSeq platform                                                                             | V1-V2           | IBS with depression and donors                                        | Paired-t-test: p < 0.05                                                                                |
| Lai WT et al. 2021 <sup>201</sup>       | Chinese  | Case-control                 | MDD (N=26)<br>Control (N=29)                                                  | 43.73 (11.46)<br>39.41(10.96)                        | 8/18<br>13/16                  | 21.17 (2.17)<br>21.10(2.23)                      | NA                                                                                                                                            | In MDD: 12 SSRIs, 7 SNRIs, 6 Other antidepressants                                                  | DSM-5                                        | HAMD-17<br>NA                  | 19.81 (2.95)<br>NA                       | Fecal samples | ~80-C | Shotgun metagenomic-Illumina HiSeq2500 sequencer                                                                             | NA              | MDD and Controls                                                      | LEfSE: adjusted p < 0.05 and LDA > 3.0                                                                 |
| Liu P et al. 2017 <sup>211</sup>        | Chinese  | Case-control                 | MDD (N=10)<br>Control (N=10)<br><br>MDD (N=60)<br>Control (N=60)              | 36.2(10.1)<br>38.1(2.9)<br><br>20-85                 | 6/4<br>6/4<br><br>--           | 23.8(1.9)<br>24.2(2.0)<br><br>--                 | --                                                                                                                                            | Longitudinal intervention (all patients received Escitalopram)                                      | DSM-IV-TR<br>HAM-D-17;23                     | HAM-D-17                       | >23<br>--                                | Fecal samples | ~70-C | 16S rRNA gene sequencing-Illumina MiSeq platform<br><br>qRT-PCR for Streptococcus, Clostridium XI, Prevotella and Klebsiella | V3-V4<br><br>-- | MDD and Controls                                                      | Double-sided Student's t-test and Wilcoxon's Sign Rank Test: p < 0.01                                  |
| Liang Y et al. 2020 <sup>212</sup>      | Chinese  | Case-control                 | PSCCID (N=41)<br>non-PSCCID (N=25)                                            | 69.63(9.35)<br>68.92(8.46)                           | 17/24<br>14/11                 | 25.14(3.62)<br>26.62(3.58)                       | In PSCCID: 24 Hypertension, 12 Diabetes mellitus; 15 Hyperlipidemia<br>In non-PSCCID: 16 Hypertension, 6 Diabetes mellitus; 10 Hyperlipidemia | Unknown                                                                                             | HAMD≥8                                       | HAMD                           | 13.63(3.50)<br>5.56(2.58)                | Fecal samples | ~80-C | 16S rRNA gene sequencing-Illumina MiSeq platform                                                                             | V3-V4           | PSCCID and non-PSCCID                                                 | LEfSE: p < 0.05 and LDA > 2.0                                                                          |
| Liukiewicz P et al. 2021 <sup>213</sup> | Polish   | Cross-sectional associations | MDD(N=16)                                                                     | 44.0 (34.3-56.3)                                     | 8/8                            | 25.0 (22.4-26.7)                                 | NA                                                                                                                                            | Longitudinal intervention (all patients received Escitalopram)                                      | ICD-10                                       | HAMDS-24                       | 23.0 (21.0-28.5)                         | Fecal samples | --    | 16S rRNA gene sequencing-Illumina NextSeq 500 platform                                                                       | V4              | Cross-sectional associations between with symptom severity (baseline) | Spearman's rank correlation                                                                            |
| Liu P et al. 2021 <sup>214</sup>        | Chinese  | Case-control                 | MDD (N=66)<br>Control (N=43)                                                  | 24.20(9.60)<br>23.67(3.19)                           | 27/39<br>20/23                 | 21.46(4.61)<br>21.81(2.15)                       | NA                                                                                                                                            | NA                                                                                                  | DSM-IV,<br>HAM-D-17;21                       | HAMD-17                        | 20.07(4.20)<br>2.31(2.04)                | Fecal samples | ~80-C | 16S rRNA gene sequencing-Illumina NovaSeq PE250 platform                                                                     | V3-V4           | MDD and Controls                                                      | LEfSE: p < 0.05 and LDA > 2.0                                                                          |
| Liu RT et al. 2020 <sup>215</sup>       | American | Case-control                 | MDD (N=43)<br>Control (N=47)                                                  | 21.9 (2.1)<br>22.1 (1.8)                             | 5/38<br>13/34                  | --                                               | NA                                                                                                                                            | In MDD: 28 prescribed psychotropic medications<br>In Control: 1 prescribed psychotropic medications | PROMIS<br>Depression<br>Score > 21,<br>DSM-5 | PROMIS<br>Depressi<br>on Score | 25.0 (6.9)<br>9.3 (1.4)                  | Fecal samples | ~80-C | 16S rRNA gene sequencing-Illumina MiSeq platform                                                                             | V4              | MDD and Controls                                                      | LEfSE: p < 0.05 and LDA > 2.0                                                                          |
| Liu T et al. 2020 <sup>216</sup>        | Chinese  | Cross-sectional associations | IBS-D (N=84)<br>Control (N=46)                                                | 41.76 (11.57)<br>38.30 (13.13)                       | 46/24<br>25/21                 | 23.36 (3.49)<br>23.63 (3.76)                     | IBS-D                                                                                                                                         | --                                                                                                  | HAMD/SDS                                     | HAMD                           | 13.23<br>(5.15)/49.89<br>(9.59)<br>NA/NA | Fecal samples | ~80-C | 16S rRNA gene sequencing-Illumina MiSeq platform                                                                             | V3-V4           | Cross-sectional associations with depression symptom measures         | Spearman's correlation coefficient                                                                     |
| Liu Y et al. 2016 <sup>217</sup>        | Chinese  | Case-control                 | IBS-D (N=40)<br>Comorbid IBS-D and MDD (N=25)<br>MDD (N=15)<br>Control (N=20) | 38.5(13.6)<br>39.0(13.9)<br>44.8(14.9)<br>43.9(11.2) | 28/12<br>14/11<br>4/11<br>7/13 | 22.6(3.1)<br>22.0(3.8)<br>22.0(3.2)<br>24.6(2.2) | IBS-D                                                                                                                                         | NA                                                                                                  | DSM-IV MINI                                  | SDS                            | Data displayed in histogram              | Fecal samples | ~80-C | 16S rRNA gene sequencing-Roche 454 sequencing                                                                                | V1-V3           | Depression and Controls                                               | Wilcoxon rank-sum test with q value was used for correction: q < 0.05                                  |

|                                                 |           |                              |                                                                                  |                                                       |                                        |                                                  |                                                                                                                                          |                                                                                                                                                       |                                |         |                                                 |               |       |                                                                                                                                                                                                                                                                                 |             |                                                                              |                                                                                                                                                                     |
|-------------------------------------------------|-----------|------------------------------|----------------------------------------------------------------------------------|-------------------------------------------------------|----------------------------------------|--------------------------------------------------|------------------------------------------------------------------------------------------------------------------------------------------|-------------------------------------------------------------------------------------------------------------------------------------------------------|--------------------------------|---------|-------------------------------------------------|---------------|-------|---------------------------------------------------------------------------------------------------------------------------------------------------------------------------------------------------------------------------------------------------------------------------------|-------------|------------------------------------------------------------------------------|---------------------------------------------------------------------------------------------------------------------------------------------------------------------|
| Malden A et al. 2020 <sup>[61]</sup>            | American  | Cross-sectional associations | Depression(N=111)                                                                | 35.7 (13.8)                                           | 51/60                                  | –                                                | –                                                                                                                                        | –                                                                                                                                                     | SCID-4/II                      | PHQ-9   | –                                               | Fecal samples | -80°C | 16S rRNA gene sequencing-Illumina MiSeq platform<br><br>Metagenomic shotgun sequencing-Illumina sequencers                                                                                                                                                                      | V4          | Cross-sectional associations with symptom severity                           | LEfSe: p < 0.05 and LDA > 2.0                                                                                                                                       |
| Mason BL et al. 2020 <sup>[78]</sup>            | American  | Case-control                 | Comorbid MDD and anxiety (N=38)<br>Anxiety (N=8)<br>MDD (N=14)<br>Control (N=10) | 39.2(10.6)<br>40.0(13.7)<br>41.9(12.0)<br>33.0(8.4)   | 7/31<br>0/8<br>3/11<br>4/6             | 30.4(5.8)<br>33.3(9.2)<br>31.0(5.8)<br>25.6(3.5) | Anxiety                                                                                                                                  | In patients: 59 any medication; 30 Antidepressants; 15 Anti-anxiety medications                                                                       | DSM-IV Axis I Disorders (SCID) | QIDS-SR | 15.2(3.7)<br>10.9(3.9)<br>15.6(3.2)<br>1.3(0.9) | Fecal samples | -80°C | 16s rRNA gene sequencing-Roche 454 Titanium platform<br><br>16S rRNA gene qPCR for Eubacteria, Enterobacteriaceae, Eubacterium rectale/Clostridium group (Clostridial cluster XIVa), Lactobacillus/Enterococcus, Bacteroides, Clostridium leptum group (Clostridial cluster IV) | V4<br>–     | MDD and Controls                                                             | Kruskal-Wallis one-way ANOVA: p < 0.05<br>Within these clusters, p-values were adjusted to control the false discovery rate using the Benjamini and Hochberg method |
| Medina-Rodríguez EM et al. 2020 <sup>[62]</sup> | American  | Case-control                 | MDD (N=10)<br>Control (N=10)                                                     | 47.2(12.8)<br>39.6(13.4)                              | 2/8<br>2/8                             | 33.9(6.7)<br>28.7(7.1)                           | In MDD: majority of patients had masked or fully expressed generalized anxiety disorder or other anxiety disorders; 2 Mania or hypomania | –                                                                                                                                                     | QIDS≥13                        | QIDS    | 15.0(1.8)<br>1.7(1.5)                           | Fecal samples | -80°C | qPCR                                                                                                                                                                                                                                                                            | –           | MDD and Controls                                                             | Mann Whitney U test: p < 0.05                                                                                                                                       |
| Minichino A et al. 2021 <sup>[63]</sup>         | British   | Cross-sectional associations | Depression-anhedonia/ambivalence (N=786)                                         | 65.2 (7.6)                                            | 52/734                                 | –                                                | 218 Obesity                                                                                                                              | 22 Antidepressants                                                                                                                                    | –                              | –       | –                                               | Fecal samples | -80°C | 16S rRNA gene sequencing-Illumina MiSeq platform                                                                                                                                                                                                                                | V4          | Cross-sectional associations with depression symptom (anhedonia/ambivalence) | Pearson's correlation analyses                                                                                                                                      |
| Naserifardouei A et al. 2014 <sup>[62]</sup>    | Norwegian | Case-control                 | Depression(N=37)<br>Control (N=18)                                               | 49.2(13.9)<br>46.1(13.9)                              | 17/20<br>7/11                          | 25.9(4.2)<br>24.7(3.3)                           | NA                                                                                                                                       | Depression medication, Blood pressure medication                                                                                                      | ICD-10                         | MADRS   | 26.3(7.6)<br>7.2(4.8)                           | Fecal samples | -70°C | 16S rRNA gene sequencing-Illumina MiSeq platform                                                                                                                                                                                                                                | Unspecified | Depression and Controls                                                      | PLS-DA                                                                                                                                                              |
| Pérez-Santiago J et al. 2021 <sup>[63]</sup>    | American  | Case-control                 | MDD (N=66)<br>Control (N=61)                                                     | 54(48-62)<br>54(48-62)                                | –                                      | –                                                | In MDD: 56 HIV<br>In Controls: 36 HIV                                                                                                    | –                                                                                                                                                     | DSM-IV                         | –       | –                                               | Fecal samples | –     | 16S rRNA gene sequencing-Illumina MiSeq platform                                                                                                                                                                                                                                | V3-V4       | MDD and Controls                                                             | Mann-Whitney or t test: p < 0.05                                                                                                                                    |
| Qin Q et al. 2021 <sup>[64]</sup>               | Chinese   | Case-control                 | Depression (N=60)<br>Control (N=60)                                              | 19.30(0.05)<br>19.85(0.11)                            | 30/30<br>30/30                         | –                                                | Test anxiety                                                                                                                             | NA                                                                                                                                                    | –                              | HAMD-17 | 10.95(3.95)<br>1.92(1.49)                       | Fecal samples | -80°C | 16S rRNA gene sequencing-Illumina HiSeq 2000 platform                                                                                                                                                                                                                           | V4          | Depression with test anxiety and Controls                                    | One-way ANOVA followed by Tukey's multiple comparison test: p < 0.05                                                                                                |
| Ramirez-Carrillo E et al. 2020 <sup>[65]</sup>  | Mexican   | Cross-sectional associations | Depression (N=34 for adults, N=29 for children)                                  | 30.48(7.79)<br>for adults<br>7.6(1.8)<br>for children | 16/18 for adults<br>13/16 for children | –                                                | –                                                                                                                                        | –                                                                                                                                                     | –                              | –       | –                                               | Fecal samples | -80°C | 16S rRNA gene sequencing-Illumina MiSeq platform                                                                                                                                                                                                                                | V4          | Cross-sectional associations with depression symptom                         | Phyloseq, vegan and ggplot2 packages in R                                                                                                                           |
| Rhee SJ et al. 2020 <sup>[66]</sup>             | Koreans   | Case-control                 | BD (N=42)<br>MDD (N=30)<br>Control (N=36)                                        | 34.2(10.8)<br>46.2(9.7)<br>43.0(5.6)                  | 15/27<br>5/25<br>9/27                  | 24.3(4.0)<br>24.4(4.3)<br>23.9(3.9)              | NA                                                                                                                                       | In BD: 6 Antidepressant; 32 Anticonvulsant or Lithium; 33 Antipsychotics<br>In MDD: 26 Antidepressant; 1 Anticonvulsant or Lithium; 13 Antipsychotics | DSM-IV, DSM-5, MINI            | HAMD-17 | 6.21(4.80)<br>6.07(5.43)<br>–                   | Serum samples | -80°C | 16S rRNA gene sequencing-Illumina MiSeq System                                                                                                                                                                                                                                  | V3-V4       | MDD and Controls                                                             | ANCOM                                                                                                                                                               |



|                                        |            |                              |                                                                                   |                                                     |                                         |                                                    |                                                                                                                                                                                                                                                                                                                                                |                                                                                                                                 |                     |                          |                                   |               |        |                                                               |             |                                                                   |                                                                                                                  |
|----------------------------------------|------------|------------------------------|-----------------------------------------------------------------------------------|-----------------------------------------------------|-----------------------------------------|----------------------------------------------------|------------------------------------------------------------------------------------------------------------------------------------------------------------------------------------------------------------------------------------------------------------------------------------------------------------------------------------------------|---------------------------------------------------------------------------------------------------------------------------------|---------------------|--------------------------|-----------------------------------|---------------|--------|---------------------------------------------------------------|-------------|-------------------------------------------------------------------|------------------------------------------------------------------------------------------------------------------|
| Rhee SJ et al. 2021 <sup>91</sup>      | Koreans    | Cross-sectional associations | Depression (N=69)                                                                 | 39.6(12.0)                                          | 18/51                                   | 24.2(4.1)                                          | 29 MDD patients, 40 BD patients                                                                                                                                                                                                                                                                                                                | 31 Antidepressant; 33 Anticonvulsant or lithium; 45 Antipsychotics                                                              | DSM-IV, DSM-5, MINI | HAMD-17                  | 6.13(5.08)                        | Serum         | -80°C  | 16S rRNA gene sequencing-Illumina MSeq platform               | V3-V4       | Cross-sectional associations with depression symptom measures     | Multivariate association with linear models (MaAsLin2)                                                           |
| Rong H et al. 2019 <sup>92</sup>       | Chinese    | Case-control                 | BD (N=30)<br>MDD (N=31)<br>Control (N=30)                                         | 38.40 (8.33)<br>41.58(10.40)<br>39.47(10.22)        | 15/15<br>9/22<br>14/16                  | 21.92 (2.22)<br>21.46(2.3)<br>21.97(3.18)          | NA                                                                                                                                                                                                                                                                                                                                             | In MDD: 13 SSRI; 8 SNRI; 6 Other antidepressants<br>In BPD: 11 SSRI; 3 SNRI; 1 Other antidepressants; 7 Atypical antipsychotics | DSM-5               | HAMD-17                  | 20.37 (3.41)<br>20.23(3.11)<br>-- | Fecal samples | -80°C  | Shotgun metagenomic-Illumina HiSeq2500 sequencer              | --          | MDD and Controls                                                  | Wilcoxon rank-sum test with FDR multiple testing correction; p < 0.05                                            |
| Shen Y et al. 2021 <sup>93</sup>       | Chinese    | Case-control                 | MDD (N=30)<br>Control (N=30)                                                      | 44.83(11.00)<br>43.97(10.57)                        | 13/17<br>15/15                          | 23.99(2.05)<br>23.83(2.08)                         | NA                                                                                                                                                                                                                                                                                                                                             | NA                                                                                                                              | MINI<br>HAMD-17 ≥24 | HAMD-17                  | --                                | Fecal samples | -80°C  | 16S rRNA gene sequencing-Illumina HiSeq 2500 platform         | V3-V4       | MDD and Controls                                                  | Metastats (T test); p < 0.05                                                                                     |
| Simpson CA et al. 2020 <sup>94</sup>   | Australian | Case-control                 | high-depression(N=33)<br>low-depression(N=33)                                     | 16.84(1.11)<br>17.02(0.89)                          | 7/26<br>13/20                           | --                                                 | Anxiety                                                                                                                                                                                                                                                                                                                                        | NA                                                                                                                              | CESD                | CESD                     | 20.14(9.78)<br>10.59(5.75)        | Saliva sample | -30°C  | 16S rRNA gene sequencing-Ion Torrent Personal Genome Machine  | V4          | High-depression and low-depression                                | Multivariate association with linear model analysis (MaAsLin2); p-value < 0.05 and FDR q-value < 0.25            |
| Stevens BR et al. 2021 <sup>95</sup>   | American   | Case-control                 | Hypertension (N=18)<br>MDD (N=7)<br>MDD with Hypertension (N=8)<br>Control (N=21) | 59.9(17.6)<br>63.8(6.2)<br>67.0(10.7)<br>53.0(14.8) | 8/10<br>3/4<br>3/5<br>8/13              | 37.5(13.4)<br>27.3(5.9)<br>34.2(10.5)<br>30.7(7.0) | In HTN: 8 Diabetes; 7 Chronic kidney disease; 2 Peripheral artery disease; 1 Stroke/Transient ischemia attack; 3 Atrial fibrillation; 1 Heart failure<br>In MDD: 2 Diabetes; 2 Stroke/Transient ischemia attack<br>In DEP plus HTN: 2 Diabetes; 3 Chronic kidney disease<br>In Controls: 9 Diabetes; 2 Chronic kidney disease; 2 Heart failure | Unknown                                                                                                                         | DSM-5               | --                       | --                                | Fecal samples | -80°C  | whole metagenome shotgun sequencing (WMGS)-Illumina HiSeq4000 | NA          | Depression only and reference subjects                            | Pearson correlation heatmaps were generated based on relative Rho magnitudes                                     |
| Stevens BR et al. 2020 <sup>72</sup>   | American   | Case-control                 | MDD (N=20)<br>Control (N=20)                                                      | mean: 34                                            | 10/10<br>6/14                           | --                                                 | NA                                                                                                                                                                                                                                                                                                                                             | In MDD: 15 Antidepressant                                                                                                       | DSM-IV              | --                       | --                                | Fecal samples | -80°C  | 16S rRNA gene sequencing-Illumina MSeq platform               | V3-V4       | MDD and Controls                                                  | ALDE2 effect sizes for taxons assigned from ASVA. Displayed cutoffs are effect size >0.5 (NODEP) or <=0.5 (DEPR) |
| Strandwitz P et al. 2019 <sup>97</sup> | American   | Cross-sectional associations | MDD (N=23)                                                                        | 19.65                                               | 8/15                                    | --                                                 | NA                                                                                                                                                                                                                                                                                                                                             | NA                                                                                                                              | DSM-IV-TR           | --                       | --                                | Fecal samples | -80°C  | 16S rRNA gene sequencing-American Gut dataset                 | V4          | Cross-sectional associations with depression symptom measures     | Pearson                                                                                                          |
| Szczesniak O et al. 2016 <sup>94</sup> | Norwegian  | Case-control                 | Depression(N=34)<br>Control (N=17)                                                | 49.2(13.9) <sup>f</sup><br>46.1(13.9) <sup>f</sup>  | 17/20 <sup>f</sup><br>7/11 <sup>f</sup> | 25.9(4.2) <sup>f</sup><br>24.7(3.3) <sup>f</sup>   | NA                                                                                                                                                                                                                                                                                                                                             | Depression medication;<br>Blood pressure medication                                                                             | ICD-10              | MADRS                    | 26.3(7.6)<br>7.2(4.8)             | Fecal samples | -70°C  | 16S rRNA gene sequencing-Illumina MSeq platform               | Unspecified | As described in Nasirifraei et al. (2014) Depression and Controls | PLS-DA                                                                                                           |
| Taylor AM et al. 2020 <sup>98</sup>    | American   | Cross-sectional associations | Depression (N=133)                                                                | 33.4(5.7)                                           | 60/73                                   | 30.9(6.7)                                          | NA                                                                                                                                                                                                                                                                                                                                             | NA                                                                                                                              | DASS-42             | DASS-42-Depression Scale | 3.4(4.6)                          | Fecal samples | -80 °C | 16S rRNA gene sequencing-Illumina MSeq2000 platform           | V4          | Cross-sectional associations with depression symptom measures     | Linear mixed modeling                                                                                            |
| Taylor BC et al. 2020 <sup>98</sup>    | American   | Case-control                 | MDD (N=34)<br>Control (N=14)                                                      | 53.8(9.1) <sup>*</sup>                              | 41/7 <sup>*</sup>                       | --                                                 | HIV and HCV infections                                                                                                                                                                                                                                                                                                                         | --                                                                                                                              | DSM-IV, BDI-II ≥14  | BDI-II                   | 10.9(10.7)                        | Fecal samples | --     | 16S rRNA gene sequencing-Illumina MSeq platform               | V4          | MDD and Controls (Connected)                                      | Kruskal-Wallis test: p < 0.05                                                                                    |

|                                            |                            |                              |                                                                                                                  |                                                   |                        |                                                     |             |                                                                                               |                                 |         |                                                   |                |                  |                                                                                                                     |             |                                                                                                                    |                                                                     |
|--------------------------------------------|----------------------------|------------------------------|------------------------------------------------------------------------------------------------------------------|---------------------------------------------------|------------------------|-----------------------------------------------------|-------------|-----------------------------------------------------------------------------------------------|---------------------------------|---------|---------------------------------------------------|----------------|------------------|---------------------------------------------------------------------------------------------------------------------|-------------|--------------------------------------------------------------------------------------------------------------------|---------------------------------------------------------------------|
| Valles-Colomer M et al. 2019 <sup>97</sup> | Belgian<br><br>Netherlands | Case-control                 | FGFP cohort: Depression (N=121) Control (N=933)<br><br>Validation LLD cohort: Depression(N=115) Controls (N=948) | 50.9<br><br>44.9                                  | 479/575<br><br>448/615 | 24.9<br><br>25.3                                    | Unspecified | In FGFP cohort: 52 Antidepressant treatment<br><br>In LLD cohort: 29 Antidepressant treatment | Unspecified                     | --      | --                                                | Fecal samples  | -80°C            | 16S rRNA gene sequencing Illumina HiSeq 2500 System/Illumina MiSeq platform Shotgun metagenomics-Illumina HiSeq2500 | V4          | Two independent studies (Flemish Gut Flora Project [FGFP] and Dutch Lifelines DEEP [LLD]); Depression and Controls | Generalized linear models (GLMs): FDR <0.1                          |
| Wingfield B et al. 2021 <sup>98</sup>      | English                    | Case-control                 | MDD (N=40) Control (N=43)                                                                                        | 21.8(5.1) 20.4(3.9)                               | 11/29 13/30            | --                                                  | NA          | NA                                                                                            | DSM-IV                          | --      | --                                                | Saliva samples | Room temperature | 16S rRNA gene sequencing-Illumina MiSeq platform                                                                    | V3-V4       | MDD and Controls                                                                                                   | Wald test and Benjamini-Hochberg (FDR) correction: FDR < 0.05       |
| Xu C et al. 2020 <sup>99</sup>             | Chinese                    | Case-control                 | IBS-D (N=22) Comorbid IBS-D and MDD (N=13) MDD (N=15) Control (N=15)                                             | 40.7(3.1) 43.1(3.6) 42.3(3.0) 44.8(2.9)           | 12/30 6/7 6/9 5/10     | 22.9(0.7) 22.7(1.1) 21.3(0.7) 24.1(0.7)             | IBS-D       | NA                                                                                            | DSM-IV MINI                     | SDS     | 39.5(2.1) 64.5(3.6) 58.2(2.3) 28.7(1.4)           | Fecal samples  | -80°C            | Metagenomic Sequencing-Illumina HiSeq™ platform                                                                     | NA          | MDD and Controls                                                                                                   | One-way ANOVA: p < 0.05                                             |
| Yang J et al. 2020 <sup>100</sup>          | Chinese                    | Case-control                 | MDD (N=118) Control (N=118)                                                                                      | 27.19(4.71) 26.86(5.24)                           | 51/67 51/67            | 22.50(3.56) 22.09(3.33)                             | NA          | NA                                                                                            | DSM-IV MINI                     | HAMD-17 | 22.03(5.08) NA                                    | Fecal samples  | --               | Metagenomic-Illumina NovaSeq                                                                                        | NA          | MDD and Controls                                                                                                   | Lefse: LDA > 2.5                                                    |
| Yang Y et al. 2021 <sup>101</sup>          | Chinese                    | Cross-sectional associations | METH abuser (N=16) Control (N=14)                                                                                | 36(7.8) 36(9.4)                                   | 16/0 14/0              | --                                                  | NA          | Methamphetamine                                                                               | DSM-5                           | PANSS   | --                                                | Fecal samples  | -80°C            | 16S rRNA gene sequencing-Illumina NovaSeq platform                                                                  | V4          | Cross-sectional associations with depression symptom measures                                                      | Spearman's rank-correlation analysis: p < 0.05                      |
| Ye X et al. 2021 <sup>102</sup>            | Chinese                    | Case-control                 | MDD (N=26) Control (N=28)                                                                                        | 26.04(7.83) 26.04(7.83)                           | 5/21 7/21              | 19.78(2.12) 21.59(3.48)                             | NA          | NA                                                                                            | DSM-IV HAMD-17:24               | HAMD-17 | 27.92(2.77) 1.29(1.3)                             | Fecal samples  | -80°C            | 16S rRNA gene sequencing-Illumina HiSeq 2500 platform                                                               | V3-V4       | MDD and Controls (baseline)                                                                                        | LEfSe: p < 0.05 and LDA > 3.5                                       |
| Zhang Q et al. 2021 <sup>103</sup>         | Chinese                    | Case-control                 | MDD (N=36) Control (N=45)                                                                                        | 36.81(13.52) 39.29(11.44)                         | 12/15 19/26            | 24.47(4.16) 23.94(3.05)                             | NA          | NA                                                                                            | ICD-10 HAMD-D >17               | HAMD-17 | 5.36(6.24) 0.51(1.01)                             | Fecal samples  | -80°C            | 16S rRNA gene sequencing-Illumina NovaSeq 6000 platform                                                             | V4-V5       | MDD and Controls                                                                                                   | LEfSe: p < 0.05 and LDA ≥ 2.0                                       |
| Zhao H et al. 2021 <sup>104</sup>          | Chinese                    | Case-control                 | MDD (N=24) Control (N=26)                                                                                        | 29.96(8.554) 31.31(9.707)                         | 7/17 8/18              | --                                                  | NA          | NA                                                                                            | DSM-5, HAMD-17:17               | HAMD-17 | 24.83(3.116) 2.12(2.776)                          | Fecal samples  | -80°C            | Metagenomics sequencing-Illumina Novaseq 6000 platform                                                              | --          | MDD and Controls                                                                                                   | LEfSe: p < 0.05 and LDA > 2.0 meta stat analysis                    |
| Zheng P et al. 2016 <sup>91</sup>          | Chinese                    | Case-control                 | MDD (N=58) Control (N=63)                                                                                        | 40.6(11.7) 41.8(12.3)                             | 22/36 23/40            | 22.0(2.4) 22.6(2.5)                                 | NA          | In MDD: 19 Antidepressants (e.g., Citalopram, Venlafaxine)                                    | DSM-IV-TR                       | HAMD-17 | 22.8(4.4) 0.3(0.7)                                | Fecal samples  | -80°C            | 16S rRNA gene sequencing-Roche 454 sequencing                                                                       | V3-V5       | MDD and Controls                                                                                                   | Random Forests                                                      |
| Zheng P et al. 2020 <sup>105</sup>         | Chinese                    | Case-control                 | MDD (N=122) BD (N=169) Control (N=171)                                                                           | 26.54(4.07) 25.59(8.41) 26.85(5.48)               | 45/77 85/84 71/100     | 22.41(3.63) 21.77(3.68) 22.07(3.38)                 | NA          | NA                                                                                            | DSM-IV                          | HAMD    | 22.65(5.50) NA                                    | Fecal samples  | -80°C            | 16S rRNA gene sequencing-Illumina MiSeq platform                                                                    | V3-V4       | MDD and Controls                                                                                                   | Kruskal-Wallis test: p < 0.05 LEfSe: fold change >2.0 and LDA > 2.5 |
| Zheng S et al. 2021 <sup>106</sup>         | Chinese                    | Case-control                 | Depression (N=30) Control (N=30)                                                                                 | 30.80 (10.85) 33.77 (7.02)                        | 12/18 13/17            | --                                                  | NA          | NA                                                                                            | ICD-10                          | HAMD-24 | 20.17 (7.92) 0.30 (0.79)                          | Fecal samples  | -80°C            | 16S rRNA gene sequencing-Illumina MiSeq platform                                                                    | Unspecified | Depression and Controls                                                                                            | LEfSe: p < 0.05 and LDA > 2.0 and other methods unspecified         |
| Zhou Y et al. 2020 <sup>107</sup>          | Chinese                    | Case-control                 | PPD (N=28) Control (N=16)                                                                                        | 33.64(4.27) <sup>†</sup> 32.57(3.98) <sup>†</sup> | 0/28 0/16              | 21.50 (2.87) <sup>†</sup> 20.90 (2.24) <sup>†</sup> | NA          | NA                                                                                            | DSM-IV HAMD-17:7                | HAMD-17 | 13.46 (3.51) <sup>†</sup> 3.83(1.98) <sup>†</sup> | Fecal samples  | -80°C            | 16S rRNA gene sequencing-Illumina MiSeq platform                                                                    | V4          | PPD and Controls                                                                                                   | LEfSe: p < 0.05 and LDA > 2.0                                       |
| Zhu J et al. 2021 <sup>108</sup>           | Chinese                    | Case-control                 | Depression (N=25) Control (N=46)                                                                                 | 55.30(8.20) 55.63(7.78)                           | 13/10 21/25            | 24.43(3.21) 25.51(3.47)                             | Anxiety     | --                                                                                            | --                              | PHQ-9:5 | PHQ-9                                             | --             | -80°C            | 16S rRNA gene sequencing-Illumina MiSeq platform                                                                    | V4          | Depression with anxiety and Controls                                                                               | LEfSe: p < 0.05 and LDA > 2.032                                     |
| Zhuang Z et al. 2020 <sup>109</sup>        | European                   | Cross-sectional associations | MDD (N=135458) Control (N=344901)                                                                                | --                                                | --                     | --                                                  | --          | --                                                                                            | DSM-IV,DSM-III, ICD-9 or ICD-10 | --      | --                                                | Fecal samples  | --               | Microbiota-related gene set enrichment analysis (GSEA)-                                                             | --          | Cross-sectional associations between MDD and gut                                                                   | Unspecified                                                         |

**Note:**

<sup>a</sup>Data from 56 OI patients with or without depression (Ref.22)

<sup>b</sup>Data from all 2737 individuals (Ref.23)

<sup>c</sup>Data from all 17 patients with irritable bowel syndrome (Ref.29)

<sup>d</sup>Data from 38 patients with depression and 18 controls (Ref.54)

<sup>e</sup>Data from total 48 patients (Ref.56)

<sup>f</sup>Data from 39 patients with postpartum depressive disorder and 18 controls (Ref.68)

**References**

1. E. Aizawa, H. Tsuji, T. Asahara, T. Takahashi, T. Teraishi, S. Yoshida, M. Ota, N. Koga, K. Hattori and H. Kunugi, *J Affect Disord* **2016**, *202*, 254-257.
2. S. Bai, J. Xie, H. Bai, T. Tian, T. Zou and J.-J. Chen, *J Inflamm Res* **2021**, *14*, 3755-3766.
3. S. Bai, H. Bai, D. Li, Q. Zhong, J. Xie and J.-J. Chen, *Front Cell Infect Microbiol* **2022**, *12*, 831186.
4. J. R. Caso, K. S. MacDowell, A. González-Pinto, S. García, J. de Diego-Adeliño, M. Carceller-Sindreu, F. Sarramea, J. Caballero-Villarraso, P. Gracia-García, C. De la Cámara, L. Agüera, M. L. Gómez-Lus, C. Alba, J. M. Rodríguez and J. C. Leza, *Transl Psychiatry* **2021**, *11*, 645.
5. B. Chahwan, S. Kwan, A. Isik, S. van Hemert, C. Burke and L. Roberts, *J Affect Disord* **2019**, *253*, 317-326.
6. D.-L. Chen, Y.-C. Dai, L. Zheng, Y.-L. Chen, Y.-L. Zhang and Z.-P. Tang, *Medicine (Baltimore)* **2021**, *100*, e24845.
7. J.-J. Chen, P. Zheng, Y.-Y. Liu, X.-G. Zhong, H.-Y. Wang, Y.-J. Guo and P. Xie, *Neuropsychiatr Dis Treat* **2018**, *14*, 647-655.

8. J.-J. Chen, S. He, L. Fang, B. Wang, S.-J. Bai, J. Xie, C.-J. Zhou, W. Wang and P. Xie, *Aging (Albany NY)* **2020**, *12*, 2764-2776.
9. T. Chen, R. Wang, Z. Duan, X. Yuan, Y. Ding, Z. Feng, F. Bu, L. Liu, Q. Wang, J. Zhou, L. Zhu, Q. Ni, G. Shi and Y. Chen, *Front Cell Infect Microbiol* **2021**, *11*, 723856.
10. Y. Chen, P. Meng, S. Cheng, Y. Jia, Y. Wen, X. Yang, Y. Yao, C. Pan, C. e. Li, H. Zhang, J. Zhang, Z. Zhang and F. Zhang, *Mol Brain* **2021**, *14*, 133.
11. Y.-H. Chen, F. Xue, S.-F. Yu, X.-S. Li, L. Liu, Y.-Y. Jia, W.-J. Yan, Q.-R. Tan, H.-N. Wang and Z.-W. Peng, *J Affect Disord* **2021**, *282*, 391-400.
12. Z. Chen, J. Li, S. Gui, C. Zhou, J. Chen, C. Yang, Z. Hu, H. Wang, X. Zhong, L. Zeng, K. Chen, P. Li and P. Xie, *Neuroreport* **2018**, *29*, 417-425.
13. S. Cheng, B. Han, M. Ding, Y. Wen, M. Ma, L. Zhang, X. Qi, B. Cheng, P. Li, O. P. Kafle, X. Liang, L. Liu, Y. Du, Y. Zhao and F. Zhang, *Brief Bioinform* **2020**, *21*, 1016-1022.
14. Y.-C. E. Chung, H.-C. Chen, H.-C. L. Chou, I. M. Chen, M.-S. Lee, L.-C. Chuang, Y.-W. Liu, M.-L. Lu, C.-H. Chen, C.-S. Wu, M.-C. Huang, S.-C. Liao, Y.-H. Ni, M.-S. Lai, W.-L. Shih and P.-H. Kuo, *J Psychiatr Res* **2019**, *111*, 74-82.
15. D. Ciocan, A.-M. Cassard, L. Becquemont, C. Verstuft, C. S. Voican, K. El Asmar, R. Colle, D. David, S. Trabado, B. Feve, P. Chanson, G. Perlemuter and E. Corruble, *J Psychiatry Neurosci* **2021**, *46*, E358-E368.
16. Z. Dong, X. Shen, Y. Hao, J. Li, H. Li, H. Xu, L. Yin and W. Kuang, *Front Psychiatry* **2021**, *12*, 651536.
17. A. Fontana, M. Manchia, C. Panebianco, P. Paribello, C. Arzedei, E. Cossu, M. Garzilli, M. A. Montis, A. Mura, C. Pisanu, D. Congiu, M. Copetti, F. Pinna, B. Carpinello, A. Squassina and V. Paziienza, *Biomedicines* **2020**, *8*,
18. N. Heym, B. C. Heasman, K. Hunter, S. R. Blanco, G. Y. Wang, R. Siegert, A. Cleare, G. R. Gibson, V. Kumari and A. L. Sumich, *Psychopharmacology (Berl)* **2019**, *236*, 1459-1470.
19. M. Hoggard, A. Nocera, K. Biswas, M. W. Taylor, R. G. Douglas and B. S. Bleier, *Int Forum Allergy Rhinol* **2018**, *8*, 394-405.
20. Y. Huang, X. Shi, Z. Li, Y. Shen, X. Shi, L. Wang, G. Li, Y. Yuan, J. Wang, Y. Zhang, L. Zhao, M. Zhang, Y. Kang and Y. Liang, *Neuropsychiatr Dis Treat* **2018**, *14*, 3329-3337.
21. Y. Huang, Z. Shen and W. He, *Front Aging Neurosci* **2021**, *13*, 706765.
22. W. Ishii, S. Komine-Aizawa, C. Takano, Y. Fujita, I. Morioka and S. Hayakawa, *Prim Care Companion CNS Disord* **2019**, *21*,
23. M. A. Jackson, S. Verdi, M.-E. Maxan, C. M. Shin, J. Zierer, R. C. E. Bowyer, T. Martin, F. M. K. Williams, C. Menni, J. T. Bell, T. D. Spector and C. J. Steves, *Nat Commun* **2018**, *9*, 2655.

24. H. Jiang, Z. Ling, Y. Zhang, H. Mao, Z. Ma, Y. Yin, W. Wang, W. Tang, Z. Tan, J. Shi, L. Li and B. Ruan, *Brain Behav Immun* **2015**, *48*, 186-194.
25. H.-Y. Jiang, L.-Y. Pan, X. Zhang, Z. Zhang, Y.-Y. Zhou and B. Ruan, *Brain Behav* **2020**, *10*, e01677.
26. Y. Kang, Y. Yang, J. Wang, Y. Ma, H. Cheng and D. Wan, *J Coll Physicians Surg Pak* **2021**, *31*, 1224-1227.
27. J. R. Kelly, Y. Borre, C. O'Brien, E. Patterson, S. El Aidy, J. Deane, P. J. Kennedy, S. Beers, K. Scott, G. Moloney, A. E. Hoban, L. Scott, P. Fitzgerald, P. Ross, C. Stanton, G. Clarke, J. F. Cryan and T. G. Dinan, *J Psychiatr Res* **2016**, *82*, 109-118.
28. S. C. Kleiman, H. J. Watson, E. C. Bulik-Sullivan, E. Y. Huh, L. M. Tarantino, C. M. Bulik and I. M. Carroll, *Psychosom Med* **2015**, *77*, 969-981.
29. S. Kurokawa, T. Kishimoto, S. Mizuno, T. Masaoka, M. Naganuma, K.-C. Liang, M. Kitazawa, M. Nakashima, C. Shindo, W. Suda, M. Hattori, T. Kanai and M. Mimura, *J Affect Disord* **2018**, *235*, 506-512.
30. W.-T. Lai, W.-F. Deng, S.-X. Xu, J. Zhao, D. Xu, Y.-H. Liu, Y.-Y. Guo, M.-B. Wang, F.-S. He, S.-W. Ye, Q.-F. Yang, T.-B. Liu, Y.-L. Zhang, S. Wang, M.-Z. Li, Y.-J. Yang, X.-H. Xie and H. Rong, *Psychol Med* **2021**, *51*,
31. P. Lin, B. Ding, C. Feng, S. Yin, T. Zhang, X. Qi, H. Lv, X. Guo, K. Dong, Y. Zhu and Q. Li, *J Affect Disord* **2017**, *207*, 300-304.
32. Y. Ling, Q. Gu, J. Zhang, T. Gong, X. Weng, J. Liu and J. Sun, *J Alzheimers Dis* **2020**, *77*, 1595-1608.
33. P. Liśkiewicz, M. Kaczmarczyk, B. Misiak, M. Wroński, A. Bąba-Kubiś, K. Skonieczna-Żydecka, W. Marlicz, P. Bieńkowski, A. Misera, J. Pelka-Wysiecka, J. Kucharska-Mazur, A. Konopka, I. Łoniewski and J. Samochowiec, *Prog Neuropsychopharmacol Biol Psychiatry* **2021**, *106*, 110076.
34. P. Liu, M. Gao, Z. Liu, Y. Zhang, H. Tu, L. Lei, P. Wu, A. Zhang, C. Yang, G. Li, N. Sun and K. Zhang, *Front Neurosci* **2021**, *15*, 800764.
35. R. T. Liu, A. D. Rowan-Nash, A. E. Sheehan, R. F. L. Walsh, C. M. Sanzari, B. J. Korry and P. Belenky, *Brain Behav Immun* **2020**, *88*, 308-324.
36. T. Liu, X. Gu, L.-X. Li, M. Li, B. Li, X. Cui and X.-L. Zuo, *BMC Microbiol* **2020**, *20*, 168.
37. Y. Liu, L. Zhang, X. Wang, Z. Wang, J. Zhang, R. Jiang, X. Wang, K. Wang, Z. Liu, Z. Xia, Z. Xu, Y. Nie, X. Lv, X. Wu, H. Zhu and L. Duan, *Clin Gastroenterol Hepatol* **2016**, *14*,
38. A. Madan, D. Thompson, J. C. Fowler, N. J. Ajami, R. Salas, B. C. Frueh, M. R. Bradshaw, B. L. Weinstein, J. M. Oldham and J. F. Petrosino, *J Affect Disord* **2020**, *264*,

39. B. L. Mason, Q. Li, A. Minhajuddin, A. H. Czysz, L. A. Coughlin, S. K. Hussain, A. Y. Koh and M. H. Trivedi, *J Affect Disord* **2020**, *266*, 394-401.
40. E. M. Medina-Rodriguez, D. Madorma, G. O'Connor, B. L. Mason, D. Han, S. K. Deo, M. Oppenheimer, C. B. Nemeroff, M. H. Trivedi, S. Daunert and E. Beurel, *Am J Psychiatry* **2020**, *177*, 974-990.
41. A. Minichino, M. A. Jackson, M. Francesconi, C. J. Steves, C. Menni, P. W. J. Burnet and B. R. Lennox, *Mol Psychiatry* **2021**, *26*, 6269-6276.
42. A. Naseribafrouei, K. Hestad, E. Avershina, M. Sekelja, A. Linlokken, R. Wilson and K. Rudi, *Neurogastroenterol Motil* **2014**, *26*, 1155-1162.
43. J. Pérez-Santiago, M. J. Marquina, D. Cookson, R. Giraud-Colón, R. K. Heaton, I. Grant, R. J. Ellis, S. L. Letendre and S. N. Peterson, *J Neurovirol* **2021**, *27*, 228-238.
44. Q. Qin, H. Liu, Y. Yang, Y. Wang, C. Xia, P. Tian, J. Wei, S. Li and T. Chen, *Dis Markers* **2021**, *2021*, 5597401.
45. E. Ramírez-Carrillo, O. Gaona, J. Nieto, A. Sánchez-Quinto, D. Cerqueda-García, L. I. Falcón, O. A. Rojas-Ramos and I. González-Santoyo, *Sci Rep* **2020**, *10*, 3680.
46. S. J. Rhee, H. Kim, Y. Lee, H. J. Lee, C. H. K. Park, J. Yang, Y.-K. Kim, S. Kym and Y. M. Ahn, *J Psychiatr Res* **2020**, *123*, 31-38.
47. S. J. Rhee, H. Kim, Y. Lee, H. J. Lee, C. H. K. Park, J. Yang, Y.-K. Kim and Y. M. Ahn, *Sci Rep* **2021**, *11*, 13987.
48. H. Rong, X.-H. Xie, J. Zhao, W.-T. Lai, M.-B. Wang, D. Xu, Y.-H. Liu, Y.-Y. Guo, S.-X. Xu, W.-F. Deng, Q.-F. Yang, L. Xiao, Y.-L. Zhang, F.-S. He, S. Wang and T.-B. Liu, *J Psychiatr Res* **2019**, *113*, 90-99.
49. Y. Shen, X. Yang, G. Li, J. Gao and Y. Liang, *Sci Rep* **2021**, *11*, 14918.
50. C. A. Simpson, C. Adler, M. R. du Plessis, E. R. Landau, S. G. Dasher, E. C. Reynolds, O. S. Schwartz and J. G. Simmons, *Physiol Behav* **2020**, *226*, 113126.
51. B. R. Stevens, C. J. Pepine, E. M. Richards, S. Kim and M. K. Raizada, *Am Heart J* **2021**, *239*, 27-37.
52. B. R. Stevens, L. Roesch, P. Thiago, J. T. Russell, C. J. Pepine, R. C. Holbert, M. K. Raizada and E. W. Triplett, *Mol Psychiatry* **2020**, *26*, 4277-4287.
53. P. Strandwitz, K. H. Kim, D. Terekhova, J. K. Liu, A. Sharma, J. Levering, D. McDonald, D. Dietrich, T. R. Ramadhar, A. Lekbua, N. Mroue, C. Liston, E. J. Stewart, M. J. Dubin, K. Zengler, R. Knight, J. A. Gilbert, J. Clardy and K. Lewis, *Nat Microbiol* **2019**, *4*, 396-403.
54. O. Szczesniak, K. A. Hestad, J. F. Hanssen and K. Rudi, *Nutr Neurosci* **2016**, *19*, 279-283.
55. A. M. Taylor, S. V. Thompson, C. G. Edwards, S. M. A. MUSAAD, N. A. Khan and H. D. Holscher, *Nutr Neurosci* **2020**, *23*, 983-992.

56. B. C. Taylor, K. C. Weldon, R. J. Ellis, D. Franklin, T. Groth, E. C. Gentry, A. Tripathi, D. McDonald, G. Humphrey, M. Bryant, J. Toronczak, T. Schwartz, M. F. Oliveira, R. Heaton, I. Grant, S. Gianella, S. Letendre, A. Swafford, P. C. Dorrestein and R. Knight, *mSystems* **2020**, *5*,
57. M. Valles-Colomer, G. Falony, Y. Darzi, E. F. Tigchelaar, J. Wang, R. Y. Tito, C. Schiweck, A. Kurilshikov, M. Joossens, C. Wijmenga, S. Claes, L. Van Oudenhove, A. Zhernakova, S. Vieira-Silva and J. Raes, *Nat Microbiol* **2019**, *4*, 623-632.
58. B. Wingfield, C. Lapsley, A. McDowell, G. Miliotis, M. McLafferty, S. M. O'Neill, S. Coleman, T. M. McGinnity, A. J. Bjourson and E. K. Murray, *Sci Rep* **2021**, *11*, 15009.
59. C. Xu, Q. Jia, L. Zhang, Z. Wang, S. Zhu, X. Wang, Y. Liu, M. Li, J. Zhang, X. Wang, J. Zhang, Q. Sun, K. Wang, H. Zhu and L. Duan, *Front Cell Infect Microbiol* **2020**, *10*, 580980.
60. J. Yang, P. Zheng, Y. Li, J. Wu, X. Tan, J. Zhou, Z. Sun, X. Chen, G. Zhang, H. Zhang, Y. Huang, T. Chai, J. Duan, W. Liang, B. Yin, J. Lai, T. Huang, Y. Du, P. Zhang, J. Jiang, C. Xi, L. Wu, J. Lu, T. Mou, Y. Xu, S. W. Perry, M.-L. Wong, J. Licinio, S. Hu, G. Wang and P. Xie, *Sci Adv* **2020**, *6*,
61. Y. Yang, X. Yu, X. Liu, G. Liu, K. Zeng and G. Wang, *Sci Rep* **2021**, *11*, 18178.
62. X. Ye, D. Wang, H. Zhu, D. Wang, J. Li, Y. Tang and J. Wu, *Front Psychiatry* **2021**, *12*, 641491.
63. Q. Zhang, Y. Yun, H. An, W. Zhao, T. Ma, Z. Wang and F. Yang, *Front Psychiatry* **2021**, *12*, 645045.
64. H. Zhao, K. Jin, C. Jiang, F. Pan, J. Wu, H. Luan, Z. Zhao, J. Chen, T. Mou, Z. Wang, J. Lu, S. Lu, S. Hu, Y. Xu and M. Huang, *Transl Psychiatry* **2022**, *12*, 8.
65. P. Zheng, B. Zeng, C. Zhou, M. Liu, Z. Fang, X. Xu, L. Zeng, J. Chen, S. Fan, X. Du, X. Zhang, D. Yang, Y. Yang, H. Meng, W. Li, N. D. Melgiri, J. Licinio, H. Wei and P. Xie, *Mol Psychiatry* **2016**, *21*, 786-796.
66. P. Zheng, J. Yang, Y. Li, J. Wu, W. Liang, B. Yin, X. Tan, Y. Huang, T. Chai, H. Zhang, J. Duan, J. Zhou, Z. Sun, X. Chen, S. Marwari, J. Lai, T. Huang, Y. Du, P. Zhang, S. W. Perry, M.-L. Wong, J. Licinio, S. Hu, P. Xie and G. Wang, *Adv Sci (Weinh)* **2020**, *7*, 1902862.
67. S. Zheng, Y. Zhu, W. Wu, Q. Zhang, Y. Wang, Z. Wang and F. Yang, *Brain Behav* **2021**, *11*, e02036.
68. Y. Zhou, C. Chen, H. Yu and Z. Yang, *Front Cell Infect Microbiol* **2020**, *10*, 567268.
69. J. Zhu, M. Li, D. Shao, S. Ma and W. Wei, *Front Psychiatry* **2021**, *12*, 757139.

70. Z. Zhuang, R. Yang, W. Wang, L. Qi and T. Huang, *J Neuroinflammation* **2020**, *17*, 288.



**Table S2.** Characteristics of studies investigating gut microbiota composition in animal models of depression.

| Study                                    | Object                                                       | Country | Study design | housed        | Depression model      | groups                                                                                                                                                                                                                                                            | Age         | Sex  | Definition of depression-like behaviors                                                                                                                                                                                                                                                                            | Time point of sample collection                                                                                                                                | Sample             | Storage | Gut microbiome estimation                         | Sequencing region | Microbial biomarkers from comparisons | Microbial biomarkers selection                                                                                   |
|------------------------------------------|--------------------------------------------------------------|---------|--------------|---------------|-----------------------|-------------------------------------------------------------------------------------------------------------------------------------------------------------------------------------------------------------------------------------------------------------------|-------------|------|--------------------------------------------------------------------------------------------------------------------------------------------------------------------------------------------------------------------------------------------------------------------------------------------------------------------|----------------------------------------------------------------------------------------------------------------------------------------------------------------|--------------------|---------|---------------------------------------------------|-------------------|---------------------------------------|------------------------------------------------------------------------------------------------------------------|
| Abildgaard A et al. 2021 <sup>[1]</sup>  | Flinders sensitive line rats<br>Flinders resistant line rats | Denmark | case-control | pair-housed   | FSL-depression        | FSL (N=12)<br>FSL-HFD (N=12)<br>FSL+Probiotics (N=11)<br>FSL-HFD+Probiotics (N=11)<br>FRL-Control (N=12)                                                                                                                                                          | 5-week-old  | male | FST: No data (immobility)<br>OFT: No data (locomotor activity)                                                                                                                                                                                                                                                     | Fresh faecal samples were collected at study initiation and study end                                                                                          | Faecal samples     | -80 °C  | 16S rRNA gene sequencing- Illumina MiSeq platform | V4                | FSL-depression and FRL-control        | Two-way ANOVA followed by Bonferroni correction: $p < 0.05$                                                      |
| Aithal Y et al. 2018 <sup>[2]</sup>      | Swiss mice                                                   | Morocco | case-control | -             | GBH-depression        | Acute GBH low-dose (N=6)<br>Subchronic GBH low-dose (N=6)<br>Chronic GBH low-dose (N=6)<br>Acute GBH high-dose (N=6)<br>Subchronic GBH high-dose (N=6)<br>Chronic GBH high-dose (N=6)<br>Acute control (N=6)<br>Subchronic control (N=6)<br>Chronic control (N=6) | 1-month-old | male | OFT: center time]<br>EPM: anxiety index]<br>TST: immobility time]<br>Splash test: grooming time]                                                                                                                                                                                                                   | After subchronic and chronic groups were treated daily for 6 and 12 weeks                                                                                      | Intestinal samples | -       | Bacterial strain-dilution/spreading method        | -                 | GBH-depression and control            | Two-way ANOVA followed by Holm-Sidak post hoc test: $p < 0.05$                                                   |
| Amini-Khoei H et al. 2019 <sup>[3]</sup> | NMRI mice                                                    | Iran    | case-control | 4 mice/cage   | MS-depression         | MS (N=9-12)<br>Adrenalectomized MS (N=9-12)<br>Control (N=9-12)<br>Adrenalectomized control (N=9-12)                                                                                                                                                              | pnd 50-52   | male | FST: immobility time]<br>Splash test: grooming activity time]<br>OFT: horizontal activity and rearing]<br>EPM: open arm time and entries]                                                                                                                                                                          | Fresh feces were collected from male mice at PNDS2 after having carried out valid behavioral tests                                                             | Colon contents     | -80°C   | Real-time RT-PCR                                  | -                 | MS-depression and control             | Two-way ANOVA followed by Bonferroni post hoc test: $p < 0.05$                                                   |
| As Q et al. 2020 <sup>[4]</sup>          | C57BL/6J mice                                                | China   | case-control | 5 mice/cage   | CUMS-depression       | CUMS (N=12)<br>CUMS+AGO (N=12)<br>CUMS+NMDEA low-dosage (N=12)<br>CUMS+NMDEA high-dosage (N=12)<br>Control (N=12)                                                                                                                                                 | 8-week-old  | male | Body weight]<br>SPT: sucrose preference]<br>FST: immobility time]<br>TST: immobility time]                                                                                                                                                                                                                         | After 1 week of acclimatization and 8 weeks of CUMS (the last 4 weeks received drugs treatment)                                                                | Faecal samples     | -80°C   | 16S rRNA gene sequencing- Illumina MiSeq platform | V3-V4             | CUMS-depression and control           | Mann-Whitney test followed by multiple comparisons using Benjamini & Hochberg's false discovery rate: FDR < 0.05 |
| Arslanova A et al. 2021 <sup>[5]</sup>   | mice                                                         | Russia  | case-control | 4-5 mice/cage | Antibiotic-depression | Antibiotic (N=25)<br>Antibiotic+lactobacilli (N=25)<br>Control (N=25)                                                                                                                                                                                             | 25-day-old  | male | Mortality rate?<br>Body weight]<br>SFT: sucrose preference]<br>OFT: crossing number, defecation, grooming]; rearing number, head dips, latency to exit from central zone ]<br>Rotarod test: Latency to falls]<br>PaGE: time to spent on the grip]<br>T maze: alternation]<br>Novel Object Recognition: time index] | Cecum content samples were collected on the 15th day of the experiment                                                                                         | Caecum contents    | -80°C   | 16S rRNA gene sequencing- Illumina MiSeq platform | V3-V4             | Antibiotic-depression and control     | Nonparametric ANOVA<br>Kruskal-Wallis test: $p < 0.05$                                                           |
| Bharwani A et al. 2017 <sup>[6]</sup>    | C57BL/6 mice                                                 | Canada  | case-control | Single        | CSDS-depression       | CSDS (N=24)<br>CSDS-L. rhamnosus JB-1 (N=17)<br>Control (N=18)<br>Control+L. rhamnosus JB-1 (N=13)                                                                                                                                                                | 8-week-old  | male | SIT: social interaction ratios]<br>OFT: rearing number]<br>LDT: light zone entries]                                                                                                                                                                                                                                | Faecal pellets were collected before the first defeat session (at 18th day of L. rhamnosus JB-1 treatment), the final defeat session (at the final day of JB-1 | Faecal samples     | -80°C   | 16S rRNA gene sequencing- Illumina MiSeq platform | V3                | CSDS-depression and control           | Kruskal-Wallis one-way ANOVA or the Mann Whitney U test, followed by the Benjamini-Hochberg correction           |



|                                     |                     |       |              |               |                                          |                                                                                                                                                                                                                                                                                                                                      |                  |      |                                                                                                                                         |                                                                                                                  |                |       |                                                      |       |                                                                      |                                                                                   |
|-------------------------------------|---------------------|-------|--------------|---------------|------------------------------------------|--------------------------------------------------------------------------------------------------------------------------------------------------------------------------------------------------------------------------------------------------------------------------------------------------------------------------------------|------------------|------|-----------------------------------------------------------------------------------------------------------------------------------------|------------------------------------------------------------------------------------------------------------------|----------------|-------|------------------------------------------------------|-------|----------------------------------------------------------------------|-----------------------------------------------------------------------------------|
|                                     |                     |       |              |               |                                          | UCMS (N=8)<br>UCMS+L. reuteri (N=8)<br>Control (N=8)                                                                                                                                                                                                                                                                                 |                  |      |                                                                                                                                         |                                                                                                                  |                |       |                                                      |       |                                                                      |                                                                                   |
| Chen T et al. 2021 <sup>[71]</sup>  | C57BL/6N mice       | China | case-control | 3-4 mice/cage | CRS-depression<br><br>FMT CRS-depression | Experiment 1:<br>CRS (N=8)<br>DSS (N=8)<br>DSS+CRS (N=8)<br>Control (N=8)<br><br>Experiment 2:<br>donor Control (N=10)<br>donor CRS (N=20)<br>recipient Control (N=6)<br>recipient CRS (N=6)<br>recipient CRS+A. muciniphila (N=6)<br>recipient Control+DSS(N=8)<br>recipient CRS+DSS(N=8)<br>recipient CRS+A. muciniphila+DSS (N=8) | 18-20 g          | male | OFT: total distance↓<br>TST: immobility time↑<br>FST: immobility time↑                                                                  | After 7 days of acclimatization and 30 days of CRS, followed by 7 days of DSS treatment                          | Cecal contents | -     | 16S rRNA gene sequencing-<br>Illumina HiSeq platform | V3-V4 | CRS-depression and control<br><br>FMT-CRS-depression and FMT-control | Two-way ANOVA with Bonferroni's post-hoc test for multiple comparisons: p < 0.05. |
| Chen X et al. 2021 <sup>[72]</sup>  | Sprague-Dawley rats | China | case-control | -             | Lead exposure-depression                 | Lead exposure (N=15)<br>Control (N=15)                                                                                                                                                                                                                                                                                               | Adult 200 ± 10 g | male | SPT: sacrose preference↓<br>FST: immobility time↑<br>OFT: total distance↑, center distance↑<br>EPM: open arms entries↑, open arms time↓ | After 1 week of acclimatization and 24 weeks of lead exposure                                                    | Fecal samples  | -     | 16S rRNA gene sequencing-                            | V4    | Lead exposure-depression and control                                 | Anosim: p < 0.05<br>LEISE: p < 0.05 and LDA > 3.0                                 |
| Chen X et al. 2022 <sup>[73]</sup>  | Sprague-Dawley rats | China | case-control | -             | Lead exposure-depression                 | Lead exposure (N=15)<br>Lead exposure+Probiotics (N=15)<br>Control (N=15)                                                                                                                                                                                                                                                            | Adult 200 ± 10 g | male | SPT: sacrose preference↓<br>FST: immobility time↑<br>TST: immobility time↑                                                              | After 1 week of acclimatization and 24 weeks of lead exposure                                                    | Fecal samples  | -     | 16S rRNA gene sequencing-                            | V4    | Lead exposure-depression and control                                 | Anosim: p < 0.05<br>LEISE: p < 0.05 and LDA > 3.0                                 |
| Chen Y et al. 2021a <sup>[74]</sup> | C57BL/6 mice        | China | case-control | -             | CUMS-depression                          | Prevention trial:<br>CUMS (N=6)<br>CUMS+Fluoxetine (N=6)<br>CUMS+PHGG (N=6)<br>CUMS+PHGG+Fluoxetine (N=6)<br>Control (N=6)<br><br>Intervention trial:<br>CUMS (N=7)<br>CUMS+Fluoxetine (N=7)<br>CUMS+PHGG (N=7)<br>CUMS+PHGG+Fluoxetine (N=7)                                                                                        | 5-week-old       | male | Body weight↓<br>SPT: sacrose preference↓<br>FST: immobility time↑<br>OFT: center time↓, rearing number and crossing number↓             | After 1 week of acclimatization, mice feces were collected every week during 4 weeks of CUMS and drugs treatment | Fecal samples  | -80-C | 16S rRNA gene sequencing-<br>Illumina HiSeq platform | V3-V4 | CUMS-depression and control                                          | Student's t-test: p < 0.05                                                        |
| Chen Y et al. 2021b <sup>[75]</sup> | Sprague-Dawley rats | China | case-control | -             | CUMS-depression                          | CUMS (N=10)<br>CUMS+ Semen Sojoe Praeparatum (N=10)<br>Control (N=10)                                                                                                                                                                                                                                                                | Adult 180-220 g  | male | SPT: sugar preference↓<br>FST: immobility time↑<br>LDT: dark time↑                                                                      | After 15 days of acclimatization, 3 weeks of CUMS and 4 weeks of Semen Sojoe Praeparatum treatment               | Cecum contents | -80-C | 16S rRNA gene sequencing-<br>Illumina MiSeq platform | V3-V4 | CUMS-depression and control                                          | LEISE: p < 0.05 and LDA > 3.0<br>one-way ANOVA and Welch's t-test: p < 0.05       |

|                                         |                     |        |              |                                                 |                           |                                                                                                                                                                                      |               |      |                                                                                                                                     |                                                                                                                                                                                    |                                                          |        |                                                      |       |                                                             |                                                                                                          |
|-----------------------------------------|---------------------|--------|--------------|-------------------------------------------------|---------------------------|--------------------------------------------------------------------------------------------------------------------------------------------------------------------------------------|---------------|------|-------------------------------------------------------------------------------------------------------------------------------------|------------------------------------------------------------------------------------------------------------------------------------------------------------------------------------|----------------------------------------------------------|--------|------------------------------------------------------|-------|-------------------------------------------------------------|----------------------------------------------------------------------------------------------------------|
| Cheng D et al. 2018 <sup>(76)</sup>     | Sprague-Dawley rat  | China  | case-control | single                                          | Hydrocortisone-depression | Hydrocortisone (N=10)<br>Hydrocortisone+Tiansi (N=10)<br>Control (N=10)                                                                                                              | 250-280 g     | male | OFF: total distance↓<br>SPT: sucrose preference↓                                                                                    | After 1 week of acclimatization and 21 days of drugs                                                                                                                               | Feces from the colon samples and small intestinal mucosa | ~80 °C | 16S rRNA gene sequencing-MiSeq (Illumina) platform   | V3-V4 | Hydrocortisone-depression and control                       | A Kruskal-Wallis test: $p < 0.05$<br>Metastats: FDR-adjust $p \leq 0.1$                                  |
| Cheng R et al. 2021 <sup>(77)</sup>     | C57BL/6 mice        | China  | case-control | -                                               | CUMS-depression           | CUMS (N=7-8)<br>CUMS+Amuc_1100 (N=7-8)<br>CUMS+Fluoxetine (N=7-8)<br>Control (N=7-8)                                                                                                 | 5-6 weeks old | male | LDT: light time↓                                                                                                                    | After 6 weeks of CUMS and treatment                                                                                                                                                | Fecal samples                                            | -      | 16S rRNA gene sequencing-                            | V3-V4 | CUMS-depression and control                                 | One-way ANOVA and Fisher's least significant difference (LSD) tests for multiple comparisons: $p < 0.05$ |
| Chevalier G et al. 2020 <sup>(78)</sup> | C57BL/6J mice       | France | case-control | -                                               | UCMS-depression           | UCMS (N=4)<br>Control (N=4)<br><br>FMT-UCMS (N=4)<br>FMT-Control (N=4)                                                                                                               | 8-10-week-old | male | NSFT: latency to eat↓<br>Splash test: grooming latency↓,<br>self-grooming behavior↓<br>FST:immobility time↓<br>TST:immobility time↓ | After 1 week of acclimatization and 8 weeks of UCMS<br><br>8 weeks post FMT                                                                                                        | Fecal samples                                            | -      | 16S rRNA metagenomic-Illumina MiSeq instrument       | V3-V4 | UCMS-depression and control<br><br>FMT-UCMS and FMT-control | Mann-Whitney test: $p < 0.05$                                                                            |
| Chi L et al. 2020 <sup>(79)</sup>       | Sprague-Dawley rats | China  | case-control | 4-6 rats/cage for control, single for CUMS mice | CUMS-depression           | CUMS (N=12)<br>CUMS+FOS (N=12)<br>CUMS+Flx (N=12)<br>CUMS+DP5 (N=10)<br>Control (N=8)<br>Control+FOS (N=8)                                                                           | 6-week-old    | male | Body weight↓<br>SPT: sucrose preference↓<br>OFF: total distance↓, immobility time↑,<br>travel velocity↓                             | After 1 week of acclimatization and 7 weeks of CUMS, the last 3 weeks received drugs treatment, fecal samples were collected at day 0, 15, and 22 during the drug treatment period | Fecal samples                                            | ~80 °C | 16S rRNA gene pyrosequencing-Illumina MiSeq system   | V3-V4 | CUMS-depression and control                                 | LEISe: $p < 0.05$ and LDA > 1.0                                                                          |
| Choi J et al. 2020 <sup>(22)</sup>      | C57BL/6J mice       | Korea  | case-control | -                                               | CRS-depression            | CRS (N=12)<br>CRS+Lac-EV (N=8)<br>CRS+Bac-EV (N=12)<br>CRS+Akk-EV (N=11)<br>Control (N=12)<br>Control+Lac-EV (N=6)<br>Control+Bac-EV (N=12)<br>Control+Akk-EV (N=12)                 | 7-week-old    | male | FST: immobility time↑<br>TST: immobility time↑                                                                                      | After 5 days of acclimatization, stools were collected at day 1 (before stress), day 14 (after stress), and post-stress day 14                                                     | Fecal samples                                            | ~80 °C | 16S rRNA gene sequencing-Roche 454 sequencing        | V1-V2 | CRS-depression and control (post-stress day 14)             | Two-way ANOVA: $p < 0.05$                                                                                |
| Daugé V et al. 2020 <sup>(23)</sup>     | Long Evans Rats     | China  | case-control | -                                               | MD-depression             | Experiment for Fischer rats: Probiotics (N=12)<br>Control (N=12)<br>Experiment for Long Evans rats: MD (N=12)<br>MD+Probiotics (N=12)<br>Control (N=12)<br>Control+Probiotics (N=12) | 6-week-old    | male | OFF: center visits number↓, rearings number↓                                                                                        | After receiving 0.5 mL of the probiotics for 5 weeks for Fischer rats and 9 weeks for Long Evans rats (until euthanasia)                                                           | Cecal content                                            | ~80 °C | 16S rRNA sequencing analysis-Illumina MiSeq platform | V3-V4 | MD-depression and control                                   | ANOVA: $p < 0.05$                                                                                        |
| Deng Y et al. 2021 <sup>(24)</sup>      | C57BL/6J mice       | China  | case-control | 5 mice/cage                                     | CRS-depression            | CRS+PBS (N=8)<br>CRS+CITA (N=8)<br>Control+PBS (N=8)<br>Control+CITA (N=8)                                                                                                           | 6-week-old    | male | FST: immobility time↑<br>SPT: sucrose preference↓<br>PFT: center time↓<br>EPM: open arms time↓                                      | After 2 week of acclimatization and 5 weeks of CRS (the last 3 weeks received drugs)                                                                                               | Fecal samples                                            | ~80 °C | 16S rRNA gene sequencing-Illumina MiSeq platform     | V3-V4 | CRS-depression and control (PBS)                            | Two-way ANOVA followed by Fisher's LSD test or Dunn's correction: $p < 0.05$                             |

|                                       |                        |         |              |               |                                              |                                                                                                                                                                                                                      |                  |      |                                                                                                                                                                                                                                                                                |                                                                                                                                                                        |                                  |        |                                                  |       |                                                                   |                                                                                                               |
|---------------------------------------|------------------------|---------|--------------|---------------|----------------------------------------------|----------------------------------------------------------------------------------------------------------------------------------------------------------------------------------------------------------------------|------------------|------|--------------------------------------------------------------------------------------------------------------------------------------------------------------------------------------------------------------------------------------------------------------------------------|------------------------------------------------------------------------------------------------------------------------------------------------------------------------|----------------------------------|--------|--------------------------------------------------|-------|-------------------------------------------------------------------|---------------------------------------------------------------------------------------------------------------|
| Dhalwaj J et al. 2018 <sup>29</sup>   | Swiss albino LACA mice | India   | case-control | -             | CUMS-depression<br><br>SD-depression         | CUMS (N=8)<br>CUMS+L. plantarum MTCC 9510 (N=8)<br>Control (N=8)<br>Control+L. plantarum MTCC 9510 (N=8)<br><br>SD (N=8)<br>SD+L. plantarum MTCC 9510 (N=8)<br>Control (N=6)<br>Control+L. plantarum MTCC 9510 (N=6) | 25-30 g          | male | Locomotor activity <br>EZM: open arm time <br>MCT: mirror chamber time <br>Stereotypic behaviour: stereotypy scores <br>MWM: transfer latency , target quadrant time and frequency of appearance <br>PAR: number of mistakes <br>FST: immobility time <br>TST: immobility time | After 4 weeks of CUMS (and L. plantarum MTCC 9510)<br><br>After 21 days of L. plantarum MTCC 9510 (day 7-10 received sleep deprivation)                                | Caecal contents                  | -      | qPCR                                             | -     | CUMS-depression and control<br><br>SD-depression and control      | One-way ANOVA followed by Tukey's multiple comparison test: p < 0.05                                          |
| Ding Y et al. 2021 <sup>291</sup>     | C57BL/6 mice           | China   | case-control | -             | CRS-depression                               | CRS (N=6)<br>CRS+A. muciniphila (N=6)<br>A. muciniphila (N=6)<br>CRS+ Lactobacillus low-dose (N=6)<br>CRS+ Lactobacillus high-dose (N=6)<br>Control (N=6)                                                            | 6-8-week-old     | male | OFT: total distance <br>FST: immobility time <br>TST: immobility time                                                                                                                                                                                                          | After 1 week of acclimatization and 3 weeks of CRS and Akkermansia muciniphila treatment                                                                               | Cecal contents and fecal samples | -80°C  | 16S rRNA gene sequencing-Illumina platform       | V3-V4 | CRS-depression and control                                        | Welch's t-test: p < 0.05                                                                                      |
| Diviccaro S et al. 2019 <sup>73</sup> | Sprague-Dawley rats    | Italy   | case-control | -             | Finasteride-depression                       | Finasteride after treatment (N=10)<br>Control after treatment (N=10)<br>Finasteride after withdrawal (N=10)<br>Control after withdrawal (N=10)                                                                       | 250-275g         | male | FST: immobility time                                                                                                                                                                                                                                                           | After 1 week of acclimatization and 20 days of finasteride treatment and 1 month after withdrawal                                                                      | Fecal samples                    | -      | 16S rRNA gene sequencing-Illumina MiSeq platform | V3-V4 | Finasteride-depression and control (withdrawal)                   | Mann-Whitney test: p < 0.05                                                                                   |
| Donoso F et al. 2020 <sup>292</sup>   | Sprague-Dawley rats    | Ireland | case-control | 2-4 rats/cage | MS-depression                                | MS (N=12)<br>MS+Phlorotannins (N=10)<br>MS+Xanthohumol (N=10)<br>MS+Quercetin (N=10)<br>Control (N=12)                                                                                                               | 16-week-old      | male | FST: immobility time , swimming time <br>OFT: center time and entries                                                                                                                                                                                                          | After maternal separation (PND2-12) and dietary intervention of polyphenols (week 9-16)                                                                                | Fecal samples                    | -      | 16S rRNA gene sequencing-Illumina MiSeq platform | V3-V4 | MS-depression and control                                         | Pairwise implementation of the $\alpha$ diversity function followed by Benjamini-Hochberg correction: q < 0.1 |
| Du HX et al. 2020 <sup>293</sup>      | NOD/ShiLJ mice         | China   | case-control | -             | EAP-depression<br><br>ABX FMT-EAP-depression | EAP treatment (N=8)<br>Control (N=8)<br><br>ABX FMT-EAP (N=8)<br>ABX FMT-Control (N=8)<br>ABX FMT-PBS (N=8)<br>Na Ve (N=8)                                                                                           | 4-week-old       | male | OFT: center distance , center time , rearing number <br>SPT: sucrose preference <br>FST: immobility time <br>TST: immobility time                                                                                                                                              | After 1 week of acclimatization and 24 days of immunization<br><br>After 1 week of acclimatization, 14 days of antibiotics treatment and 14 days fecal transplantation | Fecal samples                    | -80 °C | 16S rRNA gene sequencing-Illumina MiSeq platform | V3-V4 | EAP-depression and control<br><br>ABX FMT-EAP and ABX FMT-Control | Independent sample t test: p < 0.05<br>One-way ANOVA followed by post hoc Tukey tests: p < 0.05               |
| Duan J et al. 2021 <sup>294</sup>     | C57BL/6 mice           | China   | case-control | Single        | CUMS-depression                              | CUMS (N=7)<br>CUMS+escitalopram response (N=7)<br>CUMS+escitalopram non-response (N=9)<br>Control (N=8)                                                                                                              | 4-6 weeks of age | male | Body weight <br>SPT: sucrose preference <br>FST: immobility time                                                                                                                                                                                                               | After 4 weeks of CUMS then fecal samples were collected prior to ESC administration (day 0) and at 4 weeks post administration (end of study)                          | Fecal samples                    | -80 °C | 16S rRNA gene sequencing-Illumina MiSeq platform | V3-V4 | CUMS-depression and control                                       | Wilcoxon rank-sum test: p < 0.05                                                                              |
| Egerton S et al. 2020 <sup>295</sup>  | Sprague-Dawley rats    | Ireland | case-control | 2-4 mice/cage | MS-depression                                | MS (N=12)<br>MS+Flaxetine (N=12)<br>MS+Fish oil (N=10)<br>MS+Flaxetine+Fish oil (N=12)<br>Control (N=12)                                                                                                             | 16-week-old      | male | OFT: center time and entries <br>FST: immobility time , swimming time                                                                                                                                                                                                          | After maternally separated stress (PND2-12), and drugs intervention (week 8-16), fecal samples were collected at 16 weeks                                              | Fecal samples                    | -      | 16S rRNA gene sequencing-Illumina MiSeq platform | V3-V4 | MS-depression and control                                         | Student's t-test: p < 0.05                                                                                    |

|                                      |                     |             |              |             |                       |                                                                                                                                                                                                                   |                |             |                                                                                                                |                                                                                                                                                                                               |                                                       |        |                                                                                                                                            |             |                                  |                                                                                     |
|--------------------------------------|---------------------|-------------|--------------|-------------|-----------------------|-------------------------------------------------------------------------------------------------------------------------------------------------------------------------------------------------------------------|----------------|-------------|----------------------------------------------------------------------------------------------------------------|-----------------------------------------------------------------------------------------------------------------------------------------------------------------------------------------------|-------------------------------------------------------|--------|--------------------------------------------------------------------------------------------------------------------------------------------|-------------|----------------------------------|-------------------------------------------------------------------------------------|
| El Aidy S et al. 2017 <sup>72</sup>  | mice                | Netherlands | case-control | -           | MS                    | MS-5-HTT <sup>-/-</sup> (N=8)<br>Control-5-HTT <sup>-/-</sup> (N=8)<br>MS-5-HTT <sup>+/-</sup> (N=8)<br>Control-5-HTT <sup>+/-</sup> (N=8)<br>MS-5-HTT <sup>+/+</sup> (N=8)<br>Control-5-HTT <sup>+/+</sup> (N=8) | pnd21          | male/female | NA                                                                                                             | Fecal samples were collected at PND 21.                                                                                                                                                       | Fecal samples                                         | -80 °C | 16S rRNA gene sequencing-Illumina MiSeq platform                                                                                           | Unspecified | MS and control                   | The rank test-Kruskal-Wallis test: p < 0.05                                         |
| Fan L et al. 2021 <sup>73</sup>      | Sprague-Dawley rats | China       | case-control | -           | CUMS-depression       | CUMS (N=9)<br>CUMS+TG (N=9)<br>CUMS+CTE (N=9)<br>CUMS+Fluoxetine (N=9)<br>CUMS+TG+PhG (N=9)<br>CUMS+TG+IG (N=9)<br>CUMS+HT (N=9)<br>Control (N=9)                                                                 | 6-week-old     | male        | SPT: sucrose preference↓<br>OFT: total distance traveled↓, rearing number↓<br>FST: total immobility time↑      | After 1 week of acclimatization and 4 weeks of CUMS                                                                                                                                           | Cecum content samples                                 | -80 °C | 16S rRNA gene sequencing-Illumina MiSeq PE300 system                                                                                       | V3-V4       | CUMS-depression and control      | LetSe: p < 0.05 and LDA > 2.5<br>Kruskal-Wallis H-test: p < 0.05                    |
| Farshim P et al. 2016 <sup>74</sup>  | Wistar albino rats  | UK          | case-control | 6 rats/cage | Non-weaned-depression | S-Weaned (N=6)<br>S-Non-weaned (N=6)<br>NS-Weaned (N=6)<br>NS-Non-weaned (N=6)                                                                                                                                    | PND25          | male        | FST: immobility time↑, limbing time↓, swimming time↓                                                           | Fecal samples were collected at PND25                                                                                                                                                         | Contents of duodenum, jejunum, ileum, cecum and colon | -      | Fluorescence in situ Hybridization (FISH) analysis for Lactobacillus—Enterococcus, Bifidobacterium spp. and Clostridium histolyticum group | -           | Non-weaned-depression and weaned | Two-way ANOVA followed by Bonferroni-adjusted: p < 0.05                             |
| Feng Y et al. 2020 <sup>75</sup>     | Sprague-Dawley rats | China       | case-control | -           | CUMS-depression       | CUMS (N=6)<br>CUMS+Bupleuri Radix (N=6)<br>CUMS+Venlafaxine (N=6)<br>Control (N=6)                                                                                                                                | 200 ± 20 g     | male        | Body weight↓<br>SPT: sucrose preference↓<br>OFT: crossing and rearing number↓                                  | After 1 week of acclimatization and 4 weeks of CSDS                                                                                                                                           | Cecum contents                                        | -80 °C | 16S rRNA sequencing analysis-Illumina MiSeq platform                                                                                       | V3-V4       | CUMS-depression and control      | one-way ANOVA followed by Dunnett's test: p < 0.05<br>LEISe: p < 0.05 and LDA > 3.0 |
| Feng Z et al. 2020 <sup>76</sup>     | Sprague Dawley rats | China       | case-control | single      | CMS-depression        | CMS (N=6)<br>CMS-low-dose WYJYD (N=6)<br>CMS+medium-dose WYJYD (N=6)<br>CMS-high-dose WYJYD (N=6)<br>CMS+Fluoxetine (N=6)<br>Control (N=6)                                                                        | 8-week-old     | male        | FST: immobility time↑                                                                                          | After 1 week of acclimatization and 4 weeks of CMS with drugs treatment                                                                                                                       | Colon contents                                        | -      | 16S rRNA gene sequencing-                                                                                                                  | Unspecified | CMS-depression and control       | One-way ANOVA: p < 0.05                                                             |
| Forouzan S et al. 2021 <sup>77</sup> | Sprague-Dawley rats | USA         | case-control | 2 rats/cage | METH-depression       | METH (N=8)<br>Control (N=8)                                                                                                                                                                                       | 60-90 days old | male        | OFT: total distance↓<br>FST: immobility time↑                                                                  | Fecal samples were collected at the following time points: saline day 5, day 7, and day 14 of METH administration, and at 24, 48, and 96 h, and days 7, 14, and 30 of withdrawal or cessation | Fecal samples                                         | -80 °C | 16S rRNA gene sequencing-Illumina MiSeq platform                                                                                           | V4          | METH-depression and control      | Non-parametric Mann-Whitney test or the Kruskal-Wallis test: p < 0.05               |
| Gao K et al. 2022 <sup>78</sup>      | BALB/c mice         | China       | case-control | -           | CUMS-depression       | CUMS (N=10)<br>CUMS+L.c. lactis WHH2078 (N=10)<br>CUMS+Fluoxetine (N=10)<br>Control (N=10)                                                                                                                        | 6-8 weeks old  | male        | SPT: sugar preference↓<br>FST: immobility time↑<br>TST: immobility time↑<br>OFT: total distance↓, center time↓ | After 1 week of adaptation and 5 weeks of WHH2078 or fluoxetine treatment (4 weeks of CUMS after adaptation)                                                                                  | Fecal samples                                         | -80 °C | 16S rRNA gene sequencing-Illumina MiSeq platform                                                                                           | V3-V4       | CUMS-depression and control      | One-way ANOVA (or Kruskal-Wallis test): p < 0.05<br>LEISe: p < 0.05 and LDA > 3.0   |

|                                     |                     |                   |              |             |                       |                                                                                                                                                                                                                                                        |              |      |                                                                                                              |                                                                                                       |                |        |                                                                      |       |                                   |                                                                   |
|-------------------------------------|---------------------|-------------------|--------------|-------------|-----------------------|--------------------------------------------------------------------------------------------------------------------------------------------------------------------------------------------------------------------------------------------------------|--------------|------|--------------------------------------------------------------------------------------------------------------|-------------------------------------------------------------------------------------------------------|----------------|--------|----------------------------------------------------------------------|-------|-----------------------------------|-------------------------------------------------------------------|
| Gao X et al. 2020 <sup>[93]</sup>   | Sprague-Dawley rats | China             | case-control | -           | CUMS-depression       | CUMS (N=6)<br>CUMS+TPC (N=6)<br>CUMS+Venlafaxine (N=6)<br>Control (N=6)                                                                                                                                                                                | 200 ± 20 g   | male | Body weight <br>SPT: sucrose preference <br>OFT:crossing number , rearing number                             | After 1 week of acclimatization and 4 weeks of CUMS                                                   | Cecal contents | -80 °C | 16S rRNA gene sequencing-Illumina MiSeq platform                     | V3-V4 | CUMS-depression and control       | One-way ANOVA followed by Dunnett's test: p < 0.05                |
| Gong X et al. 2021 <sup>[94]</sup>  | C57BL/6J mice       | China             | case-control | 5 mice/cage | CSDS-depression       | CSDS (N=10)<br>Control (N=10)                                                                                                                                                                                                                          | 6-8-week-old | male | SFT: SI ratio <br>OFT: total and central distance , central time and entries <br>FST: immobility time        | After 1 week of acclimatization and 10 days of CSDS                                                   | Fecal samples  | -80°C  | 16S rRNA gene sequencing-Illumina MiSeq platform                     | V3-V4 | CSDS-depression and control       | LEISe: p < 0.05 and LDA > 3.0                                     |
| Gu F et al. 2020 <sup>[91]</sup>    | Sprague-Dawley rats | China             | case-control | Single      | CUMS-depression       | CUMS (N=6)<br>CUMS+L. casei (N=6)<br>CUMS+Paroxetine (N=6)<br>Control (N=5)                                                                                                                                                                            | 5-week-old   | male | Body weight <br>SPT: sucrose consumption <br>FST: immobility time <br>OFT: moving distance , velocity        | After 1 week of acclimatization and 7 weeks of CUMS (the last 4 weeks received drugs treatment)       | Fecal samples  | -      | 16S rRNA gene sequencing-Illumina HiSeq 250 platform                 | V3-V4 | CUMS-depression and control       | LEISe: Unspecified                                                |
| Gu X et al. 2022 <sup>[92]</sup>    | Wistar rats         | China             | case-control | 4 rats/cage | PSD-depression        | PSD (N=8)<br>PSD+Conventional coffee (N=8)<br>PSD+Decaffeinated coffee (N=8)<br>Control (N=8)                                                                                                                                                          | 240 ± 10g    | male | OFT: total behavioral score <br>SPT: sucrose preference <br>FST: immobility time <br>SFT: sucrose preference | After 1 week of acclimatization and 7 days of paradoxical sleep deprivation                           | Fecal samples  | -80 °C | 16S rRNA sequencing analysis-Illumina MiSeq platformNovaSeq platform | V3-V4 | PSD-depression and control        | One-way ANOVA test and two tailed Student's t-test: p < 0.05      |
| Guida F et al. 2018 <sup>[95]</sup> | C57/bl6 mice        | Italy             | case-control | -           | Antibiotic-depression | Antibiotics (N=10-12)<br>Antibiotics+L. casei (N=10-12)<br>Antibiotics+Saline (N=10-12)<br>Control (N=10-12)<br>Antibiotics+Recovery (N=10-12)                                                                                                         | 6-week-old   | male | TST: immobility time <br>FST: immobility time                                                                | After 1 week of acclimatization, 14 days of antibiotics treatment, and 7 days of probiotics treatment | Fecal samples  | -      | 16S rRNA gene sequencing-Illumina MiSeq platform                     | V3-V4 | Antibiotic-depression and control | Kruskal-Wallis and pairwise Wilcoxon tests: p < 0.05              |
| Guo Y et al. 2018 <sup>[96]</sup>   | ICR mice            | China             | case-control | 5 mice/cage | CRS-depression        | CRS (N=12)<br>CRS+Rosemary extracts (N=12)<br>Control (N=12)                                                                                                                                                                                           | Adult        | male | OFT: center time <br>TST: immobility time <br>FST: immobility time                                           | After 1 week of acclimatization and 3 weeks of CRS                                                    | Fecal samples  | -      | 16S rRNA gene sequencing-Illumina MiSeq platform                     | V1-V3 | CRS-depression and control        | One-way ANOVA: p < 0.05                                           |
| Guo Y et al. 2019 <sup>[97]</sup>   | ICR mice            | China             | case-control | 4-5/cage    | CRS-depression        | Experiment 1:<br>Amiripryline (N=10)<br>Low-dose B. adolescentis (N=10)<br>Middle-dose B. adolescentis (N=10)<br>High-dose B. adolescentis (N=10)<br>Control (N=10)<br><br>Experiment 2:<br>CRS (N=12)<br>CRS+B. adolescentis (N=12)<br>Control (N=12) | 6-week-old   | male | OFT: center time <br>EPM: open arms time and entries <br>FST: immobility time <br>TST: immobility time       | After 1 week of acclimatization and 21 days of CRS                                                    | Cecal contents | -      | 16S rRNA gene sequencing-Illumina MiSeq platform                     | V1-V3 | CRS-depression and control        | One-way ANOVA followed by the Student-Newman-Keuls test: p < 0.05 |
| Han SK et al. 2019 <sup>[98]</sup>  | C57BL/6 mice        | Republic of Korea | case-control | -           | IS-depression         | IS (N=8)<br>IS-NK41 (N=8)<br>IS-NK46 (N=8)<br>IS-NK41+NK46 (N=8)<br>IS-fluoxetine (N=8)<br>Control (N=8)                                                                                                                                               | 6-week-old   | male | EPM: open arms time and entries <br>FST: immobility time <br>TST: immobility time                            | After 2 days of IS                                                                                    | Fecal samples  | -      | qPCR                                                                 | -     | IS-depression and control         | One-way ANOVA followed by a Duncan multiple range test: p < 0.05  |

|                                    |              |       |              |   |                                    |                                                                                                                                                                                                                                                                                                                                                                                                                                                                                                                                                                                                                                                                                                                                                                                                                                                                                                                |            |      |                                                                                                               |                                                                                                          |                |       |                                                     |    |                           |                                                                                                       |
|------------------------------------|--------------|-------|--------------|---|------------------------------------|----------------------------------------------------------------------------------------------------------------------------------------------------------------------------------------------------------------------------------------------------------------------------------------------------------------------------------------------------------------------------------------------------------------------------------------------------------------------------------------------------------------------------------------------------------------------------------------------------------------------------------------------------------------------------------------------------------------------------------------------------------------------------------------------------------------------------------------------------------------------------------------------------------------|------------|------|---------------------------------------------------------------------------------------------------------------|----------------------------------------------------------------------------------------------------------|----------------|-------|-----------------------------------------------------|----|---------------------------|-------------------------------------------------------------------------------------------------------|
| Han SK et al. 2020a <sup>473</sup> | C57BL/6 mice | Korea | case-control | - | IS-depression<br><br>EC-depression | <p>Experiment 1:<br/>IS (N=6)<br/>IS+Red ginseng low-dose (N=6)<br/>IS+Red ginseng middle-dose (N=6)<br/>IS+Red ginseng high-dose (N=6)<br/>IS+Fermented red ginseng low-dose (N=6)<br/>IS+Fermented red ginseng middle-dose (N=6)<br/>IS+Fermented red ginseng high-dose (N=6)<br/>Control (N=6)</p> <p>Experiment 2:<br/>IS (N=6)<br/>IS+Fluoxetine (N=6)<br/>IS+Red ginseng low-dose (N=6)<br/>IS+Red ginseng middle-dose (N=6)<br/>IS+Fermented red ginseng low-dose (N=6)<br/>IS+Fermented red ginseng middle-dose (N=6)<br/>Control (N=6)</p> <p>Experiment 3:<br/>EC (N=6)<br/>EC+Buspirone (N=6)<br/>IS+Red ginseng low-dose (N=6)<br/>IS+Red ginseng middle-dose (N=6)<br/>IS+Fermented red ginseng low-dose (N=6)<br/>IS+Fermented red ginseng middle-dose (N=6)<br/>Control (N=6)</p> <p>Experiment 4:<br/>EC (N=6)<br/>EC+Ginsenoside Rd (N=6)<br/>EC+Protopanaxatriol (N=6)<br/>Control (N=6)</p> | 6-week-old | male | EPM: open arm time and entries ↓<br>TST: immobility time ↑<br>FST: immobility time ↑<br>LDT: light box time ↓ | After 1 week of acclimatization, 5 days of <i>Escherichia coli</i> exposed and 5 days of drugs treatment | Colon contents | ~80-C | 16S rRNA gene sequencing-Illumina iSeq 100 platform | V4 | EC-depression and control | One-way ANOVA followed by Tukey's multiple range test: $p < 0.05$<br>LEIS: $p < 0.05$ and LDA $> 3.5$ |
| Han SK et al. 2020b <sup>481</sup> | C57BL/6 mice | Korea | case-control | - | EC-depression                      | <p>EC (N=5)<br/>EC+<i>Lactobacillus reuteri</i> NK33 (N=5)<br/>EC+<i>Bifidobacterium adolescentis</i> NK98</p>                                                                                                                                                                                                                                                                                                                                                                                                                                                                                                                                                                                                                                                                                                                                                                                                 | 5-week-old | male | TST: immobility time ↑<br>FST: immobility time ↑                                                              | After 1 week of acclimatization, 5 days of <i>Escherichia coli</i>                                       | Fecal samples  | -     | 16S rRNA gene sequencing-Illumina iSeq 100 platform | V4 | EC-depression and control | One-way ANOVA followed by Tukey's multiple range test: $p <$                                          |



|                                       |               |         |              |               |                                                                                                                                                                                                                                                                                                                                                                                                                                                                   |            |      |                                                                                                                                                                         |                                                                                                              |                 |       |                                                                     |             |                                                                |                                                                 |
|---------------------------------------|---------------|---------|--------------|---------------|-------------------------------------------------------------------------------------------------------------------------------------------------------------------------------------------------------------------------------------------------------------------------------------------------------------------------------------------------------------------------------------------------------------------------------------------------------------------|------------|------|-------------------------------------------------------------------------------------------------------------------------------------------------------------------------|--------------------------------------------------------------------------------------------------------------|-----------------|-------|---------------------------------------------------------------------|-------------|----------------------------------------------------------------|-----------------------------------------------------------------|
|                                       |               |         |              |               | (N=5)<br>EC+ <i>NK33/NK98</i> (1:1) (N=5)<br>EC+ <i>NK33/NK98</i> (4:1) (N=5)<br>EC+ <i>NK33/NK98</i> (9:1) (N=5)<br>Control (N=5)                                                                                                                                                                                                                                                                                                                                |            |      |                                                                                                                                                                         | exposed and 5 days of drugs treatment                                                                        |                 |       |                                                                     |             |                                                                | 0.05<br>LEISe: $p < 0.05$ and LDA $> 3.5$                       |
| Han SK et al. 2021 <sup>[91]</sup>    | C57BL/6 mice  | Korea   | case-control | 3 mice/cage   | RS-depression<br><br>FMT-RS-depression<br><br>Experiment 1:<br>RS (N=6)<br>RS+CSS low-dose (N=6)<br>RS+CSS middle-dose (N=6)<br>RS+CSS high-dose (N=6)<br>Control (N=6)<br><br>Experiment 2:<br>RS (N=6)<br>RS+CSS middle-dose (N=6)<br>RS+Busiprone (N=6)<br>Control (N=6)<br><br>Experiment 3:<br>Control (N=6)<br>FMT-RS (N=6)<br>FMT-Control (N=6)<br><br>Experiment 4:<br>FMT-RS (N=6)<br>Control (N=6)<br>FMT-RS+CSS to RS (N=6)<br>FMT-Control to RS (N=6) | 6-week-old | male | EPM: open arm time and entries]<br>TST: immobility time]<br>FST: immobility time]<br>LDT: light box time and entries]                                                   | After 1 week of acclimatization, 2 days of RS exposed and 5 days of drugs treatment                          | Fecal samples   | -     | 16S rRNA gene sequencing-Illumina iSeq platform                     | V4          | RS-depression and control<br><br>FMT-RS-depression and control | Kruskal-Wallis test with Dunn's post-hoc test: $p < 0.05$       |
| Hao W et al. 2021 <sup>[92]</sup>     | C57BL/6 mice  | China   | case-control | -             | Antibiotic-depression<br><br>Ampicillin (N=10)<br>Ampicillin+Xiaoyaosan (N=10)<br>Ampicillin+Probiotics (N=10)<br>Control (N=10)                                                                                                                                                                                                                                                                                                                                  | 8-week-old | male | Body weight]<br>TST: immobility time]<br>OFT: total distance]<br>EPM: open arms time and distance]                                                                      | After 1 week of acclimatization and 2 weeks of ampicillin administration                                     | Cecal contents  | 20 °C | 16S rRNA gene sequencing-                                           | V3-V4       | Antibiotic-depression and control                              | Kruskal-Wallis multi-sample rank sum test: $p < 0.05$           |
| Hao WZ et al. 2021 <sup>[93]</sup>    | C57BL/6 mice  | China   | case-control | -             | CUMS-depression<br><br>CUMS (N=10)<br>CUMS+Comiferyl ferulate (N=10)<br>Control (N=10)                                                                                                                                                                                                                                                                                                                                                                            | 8-week-old | male | Body weight]<br>SPT: sugar preference]<br>FST: immobility time]<br>TST: immobility time]<br>OFT: total distance], center frequency]<br>EPM: open arms time and entries] | After 1 week of acclimatization and 8 weeks of CUMS (the last 4 weeks received comiferyl ferulate treatment) | Colon contents  | -     | 16S rRNA gene sequencing-                                           | V3-V4       | CUMS-depression and control                                    | LEISe: $p < 0.05$ and LDA $> 4.0$<br>Repeated ANOVA: $p < 0.05$ |
| Hassan AM et al. 2019 <sup>[93]</sup> | C57BL/6J mice | Austria | case-control | 2-3 mice/cage | HFD-depression<br><br>HFD (N=12)<br>Control (N=12)                                                                                                                                                                                                                                                                                                                                                                                                                | 8-week-old | male | SIT: mouse comparison preference], mouse near vicinity preference]<br>Hair coat index:]<br>SPT: sucrose preference]                                                     | caecal contents were collected from each rat at the end of the HFD experiment (8 weeks)                      | Caecal contents | -     | 16S rDNA sequencing-Ion PGM Sequencer and an Ion Sequencing 400 Kit | Unspecified | HFD-depression and control                                     | LEISe: $p < 0.05$ and LDA $> 2.0$                               |

|                                      |               |           |              |             |                                                              |                                                                                                                         |                |        |                                                                                                                                                                                                       |                                                                                                |                |        |                                                                          |             |                                                                                        |                                                                   |
|--------------------------------------|---------------|-----------|--------------|-------------|--------------------------------------------------------------|-------------------------------------------------------------------------------------------------------------------------|----------------|--------|-------------------------------------------------------------------------------------------------------------------------------------------------------------------------------------------------------|------------------------------------------------------------------------------------------------|----------------|--------|--------------------------------------------------------------------------|-------------|----------------------------------------------------------------------------------------|-------------------------------------------------------------------|
|                                      |               |           |              |             |                                                              |                                                                                                                         |                |        | LabMaster system: horizontal and vertical locomotor activity] MPT: morphine preference], saccharin solution intake]                                                                                   |                                                                                                |                |        |                                                                          |             |                                                                                        |                                                                   |
| Huang F et al. 2021 <sup>[71]</sup>  | C57BL/6 mice  | China     | case-control | pair-housed | Ovariectomy-depression                                       | Ovariectomy (N=7-8)<br>Ovariectomy+P. histicola (N=7-8)<br>Ovariectomy+Cohousing (N=7-8)<br>Control (N=7-8)             | 10-12-week-old | female | OF: center time and frequency] EPM: open arms time and frequency] FST: immobility] TST: immobility]                                                                                                   | 14 weeks after ovariectomy                                                                     | Fecal samples  | -80 °C | 16S rRNA sequencing analysis-Illumina MiSeq platform                     | Unspecified | Ovariectomy-depression and control                                                     | Kruskal-Wallis H test: p < 0.05<br>LEIS: p < 0.05 and LDA > 3.0   |
| Huang N et al. 2019 <sup>[55]</sup>  | C57BL/6 mice  | China     | case-control | -           | LPS-depression                                               | LPS (N=8)<br>LPS+ketamine (N=8)<br>Control (N=8)                                                                        | 2-month-old    | male   | FST: immobility time]                                                                                                                                                                                 | After 1 week of acclimatization, fecal samples were collected after LPS and ketamine treatment | Fecal samples  | -80°C  | 16S rRNA gene sequencing-Illumina MiSeq platform                         | V3-V5       | LPS-depression and control                                                             | Fisher's exact test: p < 0.05<br>LEIS: p < 0.05 and LDA > 2.0     |
| Huang YJ et al. 2021 <sup>[70]</sup> | C57BL/6J mice | China     | case-control | single      | sCSDS-depression                                             | sCSDS (N=7)<br>sCSDS + WGE (N=7)<br>Control (N=7)                                                                       | 5-week-old     | male   | Water and food intake] SIT: social interaction ratio], total distance] OFT: total distance], crossings number], center bouts proportion] SPT: sucrose preference]                                     | After 1 week of acclimatization and 10 days of sCSDS                                           | Fecal samples  | -      | 16S rRNA gene sequencing-Illumina NextSeq platform                       | V4          | sCSDS-depression and control                                                           | Kruskal-Wallis test: p < 0.01                                     |
| Huang YY et al. 2022 <sup>[68]</sup> | C57BL/6N mice | China     | case-control | -           | DSS-depression                                               | DSS (N=8)<br>DSS+low-dose L. plantarum(N=8)<br>DSS+high-dose L. plantarum (N=8)<br>DSS+Fluoxetine(N=8)<br>Control (N=8) | 4-5 weeks      | male   | OFT: total distance], center distance] LD: light area distance] SPT: sugar preference.] FST: immobility time]                                                                                         | After 7 days of adaption and 7 days of DSS treatment                                           | Fecal samples  | -80°C  | 16S rRNA gene sequencing-Illumina platform                               | V3-V4       | DSS-depression and control                                                             | LEIS: p < 0.05 and LDA > 2.0<br>One-way ANOVA: p < 0.05           |
| Insera A et al. 2019 <sup>[73]</sup> | C57BL/6J mice | Australia | case-control | Single      | (Casp1, Ifng, Nos2) KO anti-depression<br><br>CUS-depression | (Casp1, Ifng, Nos2) KO CUS (N=20)<br>(Casp1, Ifng, Nos2) KO (N=20)<br>Wild-type CUS(N=16)<br>Wild-type (N=16)           | 60 days        | male   | (Casp1, Ifng, Nos2) KO: FST: floating time], swimming and climbing time] SPT: sucrose preference] EPM: open arms time] CUS: FST: floating time], climbing time] EPM: open arms time] OF: center time] | After 1 week of acclimatization and 4 weeks of CUS                                             | Fecal samples  | -80 °C | 16S rRNA gene sequencing-Illumina MiSeq                                  | V4          | (Casp1, Ifng, Nos2) KO anti-depression and wild-type<br><br>CUS-depression and control | LEIS: p < 0.05 and LDA > 3.0                                      |
| Jang HM et al. 2019 <sup>[69]</sup>  | C57BL/6 mice  | Korea     | case-control | -           | IS-depression                                                | IS (N=7)<br>PC-Bupirofen (N=7)<br>IS-NK13 (N=7)<br>IS-NK98 (N=7)<br>IS-NK13+NK98 (N=7)<br>Control (N=7)                 | 5-week-old     | male   | EPM: open arm time and entries] TST: immobility time] FST: immobility time] LDT: light box time], transition number.]                                                                                 | After 1 week of acclimatization, 2 days of immobilization stress and 5 days of drugs treatment | Fecal samples  | -      | qPCR for Firmicutes, Bacteroidetes, Actinobacteria and δγ-Proteobacteria | -           | IS-depression and control                                                              | One-way ANOVA followed by a Duncan multiple range test: p < 0.05  |
| Ji S et al. 2022 <sup>[69]</sup>     | C57BL/6 mice  | China     | case-control | -           | CRS-depression                                               | CRS (N=15)<br>CRS-high-dose JWXY (N=10)<br>CRS-middle-dose JWXY (N=14)<br>CRS-low-dose JWXY (N=12)                      | 8-week-old     | -      | SPT: sucrose preference] FST: floating time] OF: total distance], center distance and time]                                                                                                           | After 1 week of acclimatization, the fecal samples were collected after 8 weeks of CRS         | Cecal contents | -80 °C | Full-length 16S rRNA sequencing-PacBio platform                          | -           | CRS-depression and control                                                             | LEIS: p < 0.05 and LDA > 4.0<br>Metastats: p < 0.05 or FDR < 0.05 |

|                                        |                     |         |              |            |                                                 |                                                                                                                                                                                                        |             |                   |                                                                                                                                                            |                                                                                                               |                  |        |                                                                                          |             |                                                                         |                                                                                          |
|----------------------------------------|---------------------|---------|--------------|------------|-------------------------------------------------|--------------------------------------------------------------------------------------------------------------------------------------------------------------------------------------------------------|-------------|-------------------|------------------------------------------------------------------------------------------------------------------------------------------------------------|---------------------------------------------------------------------------------------------------------------|------------------|--------|------------------------------------------------------------------------------------------|-------------|-------------------------------------------------------------------------|------------------------------------------------------------------------------------------|
|                                        |                     |         |              |            |                                                 | CRS-Sertraline (N=14)<br>Control (N=10)                                                                                                                                                                |             |                   | Y-Maze: alternation  <br>LDT: Time (count) and time (percent)                                                                                              |                                                                                                               |                  |        |                                                                                          |             |                                                                         |                                                                                          |
| Jiang W et al. 2021 <sup>[90]</sup>    | Sprague-Dawley rats | China   | case-control | 5 rat/cage | Post-stroke depression                          | Post-stroke depression (N=30)<br>Stroke (N=21)<br>Control (N=14)                                                                                                                                       | 180-200g    | male              | Body weight  <br>SPT: sucrose preference  <br>OFT: center time  <br>FST: immobility time                                                                   | After 1 week of acclimatization, 3 days after IR surgery and 4 weeks of CUMS                                  | Fecal samples    | -80 °C | 16S rRNA gene sequencing- Illumina MiSeq platform                                        | V3-V4       | Post-stroke depression and control                                      | LEISe: p < 0.05 and LDA ≥ 2.0                                                            |
| Jiang Y et al. 2020 <sup>[91]</sup>    | C57BL/6J mice       | China   | case-control | Single     | Alcohol-depression                              | Alcohol (N=7)<br>Alcohol-NR (N=7)<br>Control (N=7)<br><br>ABX FMT-alcohol (N=6)<br>ABX FMT-alcohol-NR (N=6)<br>ABX FMT-control (N=6)                                                                   | 7-week-old  | male              | Body weight  <br>SPT: sucrose preference  <br>FST: immobility time  <br>EMP: open arms time and entries  <br>Y-maze test: novel arm time  , start arm time | After 3 weeks of group housed and 10 weeks of alcohol exposure                                                | Colonic contents | -80 °C | 16S rRNA gene sequencing- Illumina HiSeq PE250 platform                                  | V3-V4       | Alcohol-depression and control                                          | LEISe: p < 0.05 and LDA > 2.0                                                            |
| Jianguo L et al. 2019 <sup>[92]</sup>  | Sprague-Dawley rats | China   | case-control | single     | CUMS-depression                                 | CUMS (N=6)<br>Control (N=6)                                                                                                                                                                            | 8-week-old  | male              | SPT: sugar preference  <br>OFT: immobility time  , grooming time  , crossing count  , rearing counts  <br>FST: immobility time  <br>TST: immobility time   | After 1 week of acclimatization and 4 weeks of CUMS                                                           | Fecal samples    | -      | 16S rRNA gene sequencing- Illumina MiSeq system                                          | V4          | CUMS-depression and control                                             | LEISe: adjusted p < 0.05 and LDA > 3.0                                                   |
| Kamimura Y et al. 2021 <sup>[93]</sup> | C57BL/6J mice       | Japan   | case-control | single     | CSDS-depression<br><br>Modified CSDS-depression | CSDS (N=5)<br>Control (N=7)<br><br>Modified CSDS (N=5)<br>Control (N=6)                                                                                                                                | 6-week-old  | male              | Body weights  <br>food consumption  <br>SIT: social interaction ratio  <br>FST: immobility time                                                            | After 1 week of acclimatization and 10 days of CSDS                                                           | Colon contents   | -      | 16S rRNA gene sequencing- Illumina MiSeq platform<br><br>RT-PCR for Bifidobacterium spp. | V3-V4       | CSDS-depression and control<br><br>Modified CSDS-depression and control | Student's t-test: p < 0.05                                                               |
| Karen C et al. 2021 <sup>[94]</sup>    | Wistar rats         | India   | case-control | -          | MS-depression                                   | Experiment 1:<br>MS (N=6)<br>M+P+S (N=6)<br>MS+S+M (N=6)<br>Control (N=6)<br><br>Experiment 2:<br>MS+Probiotics (N=6)<br>M+P+S+Probiotics (N=6)<br>MS+S+M+Probiotics (N=6)<br>Control-Probiotics (N=6) | PND34       | -                 | OFT: cross squares number  , center time and entries  <br>FST: immobility time  , swimming time                                                            | After maternal separation (PND5-10) and probiotics treatment (PND2-16), fecal samples were collected at PND27 | Fecal samples    | -80 °C | 16S rRNA gene sequencing- Illumina MiSeq platform                                        | V3-V4       | MS-depression and control                                               | One-way ANOVA and post hoc comparisons were performed with the Bonferroni test: p < 0.05 |
| Kelly JR et al. 2016 <sup>[95]</sup>   | Sprague-Dawley rats | Ireland | case-control | -          | ABX FMT-depression                              | ABX FMT-MDD (N=13)<br>ABX FMT-HC (N=15)                                                                                                                                                                | Adult 350 g | male              | SPT: sucrose preference  <br>EPM: open arms visits  <br>OFT: center time                                                                                   | After 14 days of acclimatization, 28 days of antibiotic , 3 days of FMT and 7 days of recolonization          | Fecal samples    | -80 °C | 16S rRNA gene sequencing- Illumina MiSeq platform                                        | Unspecified | FMT-MDD and FMT-HC                                                      | Main-Whitney U test and Benjamini-Hochberg FDR-adjusted p-value ≤ 0.1                    |
| Kemp KM et al. 2021 <sup>[96]</sup>    | C57BL/6J mice       | USA     | case-control | -          | MS                                              | MS+Early weaning (N=37)<br>Control (N=31)                                                                                                                                                              | PND28       | male:female (1:1) | NA                                                                                                                                                         | Colon contents were collected at PND2, PND10 and PND28                                                        | Colon contents   | -80 °C | 16S rRNA gene sequencing- Illumina MiSeq platform                                        | V4          | MS and control                                                          | Analysis of composition of microbiomes (ANCOM)                                           |

|                                        |                                                              |              |              |               |                                    |                                                                                                                                                                                                                                                |              |      |                                                                                                                                                                                                 |                                                                                                                                      |                |        |                                                       |       |                                                            |                                                                                               |
|----------------------------------------|--------------------------------------------------------------|--------------|--------------|---------------|------------------------------------|------------------------------------------------------------------------------------------------------------------------------------------------------------------------------------------------------------------------------------------------|--------------|------|-------------------------------------------------------------------------------------------------------------------------------------------------------------------------------------------------|--------------------------------------------------------------------------------------------------------------------------------------|----------------|--------|-------------------------------------------------------|-------|------------------------------------------------------------|-----------------------------------------------------------------------------------------------|
| Kim JK et al. 2020 <sup>[97]</sup>     | C57BL/6J mice                                                | South Korea  | case-control | 3-4 mice/cage | EC-depression                      | Escherichia coli K1 (N=7)<br>EC K1+L. mucosae NK41 (N=7)<br>Control (N=7)                                                                                                                                                                      | 5-week-old   | male | EPM: open arms time;<br>FST: immobility time <sup>†</sup>                                                                                                                                       | After 1 week of acclimatization and 5 days of Escherichia coli K1 treatment and 5 days of Lactobacillus mucosae NK41 treatment       | Fecal samples  | -80°C  | 16S rRNA gene sequencing- Illumina iSeq 100 platform  | V4    | EC-depression and control                                  | LEIS: p < 0.05 and LDA > 2.0 one-way ANOVA followed by a Duncan multiple range test: p < 0.05 |
| Kim JK et al. 2021 <sup>[98]</sup>     | C57BL/6N mice                                                | South Korean | case-control | 3 mice/cage   | IS-depression<br><br>EC-depression | IS (N=6)<br>IS+Buspiroline orally gavaged (N=6)<br>IS+Buspiroline intraperitoneally injected (N=6)<br>Control (N=6)<br><br>EC (N=6)<br>EC+Buspiroline orally gavaged (N=6)<br>EC+Buspiroline intraperitoneally injected (N=6)<br>Control (N=6) | 6-week-old   | male | EPM: open arms time and entries;<br>LDT: light time and transition;<br>FST: immobility time <sup>†</sup><br>TST: immobility time <sup>†</sup>                                                   | After 2 days of immobilization stress (or Escherichia coli K1) and 5 days of buspiroline treatment                                   | Fecal samples  | -      | 16S rRNA gene sequencing- Illumina iSeq 100 platform  | V4    | IS-depression and control<br><br>EC-depression and control | LEIS: p < 0.05 and LDA > 3.5                                                                  |
| Kaudsen JK et al. 2021 <sup>[99]</sup> | Flinders sensitive line rats<br>Flinders resistant line rats | Denmark      | case-control | pair-housed   | FMT-MDD-depression                 | FSL-FMT-MDD (N=10)<br>FSL-FMT-Healthy (N=10)<br>FSL-CON-Auto (N=10)<br>FSL-CON-H2O (N=10)<br>FRL-FMT-MDD (N=10)<br>FRL-FMT-MDD-Ser (N=10)<br>FRL-FMT-Healthy (N=10)<br>FRL-CON-Auto (N=10)<br>FRL-CON-H2O (N=10)                               | 6-8-week-old | male | FST: struggling <sup>‡</sup> , immobility <sup>†</sup>                                                                                                                                          | After 1 week of acclimatization, faecal samples were collected before transplantation (pre-FMT) and after transplantation (post-FMT) | Fecal samples  | -80 °C | 16S rRNA sequencing analysis- Illumina MiSeq platform | V4    | FRL-FMT-MDD and FMT-Healthy                                | Kruskal-Wallis test followed by Dunn's post hoc test: p < 0.05                                |
| Kosuge A et al. 2021 <sup>[78]</sup>   | C57BL/6J mice                                                | Japan        | case-control | -             | CSDS-depression                    | Experiment 1:<br>CSDS (N=11)<br>Control (N=22)<br><br>Experiment 2:<br>CSDS+M-16V (N=12)<br>CSDS (N=21)<br>Control+M-16V (N=12)<br>Control (N=28)                                                                                              | 7-week-old   | male | SIT: interaction zone time <sup>‡</sup> , corner areas time <sup>†</sup>                                                                                                                        | The fecal samples were collected 1 day before exposure of CSDS and after 5 days of CSDS                                              | Fecal samples  | -80°C  | 16S rRNA gene sequencing- Illumina MiSeq platform     | V3-V4 | CSDS-depression and control                                | LEIS: p < 0.05 and LDA > 2.0                                                                  |
| Kati D et al. 2020 <sup>[71]</sup>     | C57BL/6J mice                                                | Hungary      | case-control | 2-3 mice/cage | MS+CVS-depression                  | MS+CVS+Rifaximin (N=14)<br>MS+CVS (N=12)<br>Control+Rifaximin (N=10)<br>Control (N=9)                                                                                                                                                          | PND80        | male | OFT: velocity and total distance <sup>‡</sup> , center time <sup>‡</sup> , first latency in border <sup>‡</sup><br>EPM: Open arm preference <sup>‡</sup><br>SPT: Sugar consumption <sup>‡</sup> | Colon contents were collected after 12 days of MS (PND1-12) and 4 weeks of CVS (PND50-78)                                            | Colon contents | -70°C  | RT-qPCR                                               | -     | MS+CVS-depression and control                              | Two-way ANOVA followed by Sidak's multiple comparison test: p < 0.05                          |
| Lai WD et al. 2022 <sup>[72]</sup>     | Wistar rats                                                  | China        | case-control | -             | SD-depression                      | SD (N=8)<br>SD+Fish oil-riched diet (N=8)<br>Control (N=8)                                                                                                                                                                                     | 6-week-old   | -    | Body weight <sup>‡</sup><br>OFT: total distance <sup>‡</sup> , center time and entries <sup>‡</sup>                                                                                             | After a 6-week dietary intervention and followed by 4-week chronic sleep deprivation                                                 | Colon contents | -80 °C | 16S rRNA gene sequencing- Illumina MiSeq platform     | V3-V4 | SD-depression and control                                  | LEIS: p < 0.05 and LDA > 3.0                                                                  |

|                                      |                     |         |              |               |                      |                                                                                                                                  |              |      |                                                                                                                                                                            |                                                                                                                                                         |                                  |        |                                                                                                   |       |                                                             |                                                                                      |
|--------------------------------------|---------------------|---------|--------------|---------------|----------------------|----------------------------------------------------------------------------------------------------------------------------------|--------------|------|----------------------------------------------------------------------------------------------------------------------------------------------------------------------------|---------------------------------------------------------------------------------------------------------------------------------------------------------|----------------------------------|--------|---------------------------------------------------------------------------------------------------|-------|-------------------------------------------------------------|--------------------------------------------------------------------------------------|
|                                      |                     |         |              |               |                      |                                                                                                                                  |              |      | SPT: sugar preference;<br>FST: immobility time <sup>†</sup>                                                                                                                |                                                                                                                                                         |                                  |        |                                                                                                   |       |                                                             |                                                                                      |
| Leclercq S et al. 2020 <sup>73</sup> | C57BL/6J mice       | Belgium | case-control | 3 mice/cage   | FMT-AD-depression    | Experiment 1:<br>ABX FMT-AD (N=12)<br>ABX FMT-Control (N=12)<br><br>Experiment 2:<br>Ketogenic diet (N=21)<br>Control (N=21)     | 3-week-old   | male | Three-chamber sociability test: chamber time <sup>†</sup> , sociability index <sup>†</sup><br>FST: latency to immobility <sup>†</sup>                                      | After 10 days of antibiotic treatment, feces were collected at three time points (23, 35 and 45 days after FMT) and caecal content obtained at necropsy | Fecal samples<br>Caecal contents | -80 °C | 16S rRNA gene sequencing-<br>Illumina MiSeq platform<br><br>qPCR for Faecalibacterium prausnitzii | V5-V6 | FMT-AD-depression and FMT-control                           | Wilcoxon test with FDR correction: q < 0.05                                          |
| Lee HC et al. 2020 <sup>74</sup>     | BALB/c mice         | China   | case-control | 5-6 mice/cage | Lard diet-depression | Normal diet+Flaxetine (N=6)<br>Fish oil-based diet (N=10)<br>Lard-based diet (N=10)<br>Normal diet control (N=6)                 | 8-week-old   | -    | OF: central zone visit number <sup>†</sup><br>FST: immobility time <sup>†</sup>                                                                                            | After 4 weeks of acclimatization and 12 weeks of dietary intervention                                                                                   | Fecal samples                    | -      | 16S rRNA gene sequencing-<br>Illumina HiSeq 2500 platform                                         | V1-V3 | Lard diet-depression and normal diet control                | LEIS: p < 0.05 and LDA > 3.0                                                         |
| Li H et al. 2019 <sup>75</sup>       | Wistar rats         | China   | case-control | -             | CUMS-depression      | CUMS (N=10)<br>CUMS+FOS-GOS (N=10)<br>CUMS+B. longum (N=10)<br>CUMS+L. rhamnosus (N=10)<br>Control (N=10)                        | 200 ~ 220 g  | male | Body weights <sup>†</sup><br>FST: immobility time <sup>†</sup><br>SPT: sucrose ingestion <sup>†</sup>                                                                      | After 7 days of acclimatization and 4 weeks of CUMS                                                                                                     | Cecal contents                   | -80°C  | 16S rRNA gene sequencing-<br>Illumina HiSeq2500 platform                                          | V4    | CUMS-depression and control                                 | Metastats analysis followed by Benjamini and Hochberg false discovery rate: q < 0.05 |
| Li H et al. 2021 <sup>76</sup>       | Sprague-Dawley rats | China   | case-control | -             | CUMS-depression      | CUMS (N=14)<br>CUMS+Rifaximin (N=14)<br>Control (N=14)<br>Control+Rifaximin (N=14)                                               | 3-week-old   | male | SPT: sucrose preference <sup>†</sup><br>OF: crossing number <sup>†</sup> , rearing number <sup>†</sup> , center time <sup>†</sup>                                          | After 1 week of acclimatization and 28 days of CUMS and rifaximin treatment                                                                             | Fecal samples                    | -      | 16S rRNA sequencing analysis-<br>Shanghai Majorbio Bio-pharm Technology (Shanghai, China)         | V3-V4 | CUMS-depression and control                                 | Two-way ANOVA followed by Benjamini and Hochberg correction post hoc test: q < 0.05  |
| Li N et al. 2018 <sup>77</sup>       | C57BL/6 mice        | China   | case-control | 3-4 mice/cage | CMS-depression       | CMS (N=8)<br>CMS+Flaxetine (N=8)<br>CMS+Probiotics (N=8)<br>Control (N=8)<br>Control+Flaxetine (N=8)<br>Control+Probiotics (N=8) | 6-8-week-old | male | SPT: sucrose preference <sup>†</sup><br>EPM: open arms time <sup>†</sup><br>FST: immobility time <sup>†</sup>                                                              | After 2 weeks of acclimatization and 4 weeks of CMS                                                                                                     | Cecal contents                   | -80°C  | 16S rDNA gene sequencing-<br>Illumina HiSeq PE250 platform                                        | V3-V4 | CMS-depression and control                                  | Non-parametric Kruskal-Wallis test: p < 0.05                                         |
| Li N et al. 2019 <sup>78</sup>       | C57BL/6J mice       | China   | case-control | Single        | CUMS-depression      | CUMS (N=8)<br>Control (N=8)<br>CUMS-donor (N=8)<br>Control-donor (N=8)<br><br>ABX FMT-CUMS (N=8)<br>ABX FMT-Control (N=8)        | 7-week-old   | male | Body weights <sup>†</sup><br>SPT: sucrose preference <sup>†</sup><br>OF: center time <sup>†</sup><br>EPM: open arms time <sup>†</sup><br>FST: immobility time <sup>†</sup> | After 1 week of acclimatization and 4 weeks of UCMS<br><br>2 weeks post FMT                                                                             | Cecum content                    | -80 °C | 16S rRNA gene sequencing-<br>Illumina HiSeq platform                                              | V3-V4 | CUMS-depression and control<br><br>FMT-CUMS and FMT-control | Wilcoxon rank sum tests: p < 0.05                                                    |
| Li P et al. 2021 <sup>79</sup>       | Sprague-Dawley rats | China   | case-control | Single        | CUMS-depression      | CUMS (N=8)<br>CUMS+Acupuncture (N=8)<br>CUMS+Flaxetine (N=8)<br>Control (N=8)                                                    | 5-week-old   | male | Body weight <sup>†</sup><br>OF: total distance <sup>†</sup><br>EPM: open arms time <sup>†</sup><br>SPT: sucrose preference <sup>†</sup>                                    | After 1 week of acclimatization and 6 weeks of CUMS                                                                                                     | Fecal samples                    | -      | 16S rDNA gene sequencing-<br>Illumina platform                                                    | V3-V4 | CUMS-depression and control                                 | One-way ANOVA followed by Games-Howell test: p < 0.05                                |
| Li Q et al. 2021 <sup>80</sup>       | Sprague-Dawley rats | China   | case-control | Single        | CUMS-depression      | CUMS (N=6)<br>CUMS+Paroxetine (N=6)                                                                                              | 6-8-week-old | male | Body weights <sup>†</sup><br>FST: immovability time <sup>†</sup>                                                                                                           | After 1 week of acclimatization and 4 weeks of CUMS                                                                                                     | Cecal contents                   | -      | RT-PCR for Lactobacillus, Bifidobacteria, Enterococcus faecalis and Escherichia coli              | -     | CUMS-depression and control                                 | One-way ANOVA followed by the least significant difference test: p < 0.05            |

|                                     |                     |       |              |                 |                           |                                                                                                                                                                                                                                                                     |             |        |                                                                                                                                                                        |                                                                                                                                           |                |        |                                                                                                                             |       |                                       |                                                                                            |
|-------------------------------------|---------------------|-------|--------------|-----------------|---------------------------|---------------------------------------------------------------------------------------------------------------------------------------------------------------------------------------------------------------------------------------------------------------------|-------------|--------|------------------------------------------------------------------------------------------------------------------------------------------------------------------------|-------------------------------------------------------------------------------------------------------------------------------------------|----------------|--------|-----------------------------------------------------------------------------------------------------------------------------|-------|---------------------------------------|--------------------------------------------------------------------------------------------|
|                                     |                     |       |              |                 |                           | CUMS+Probiotic (N=6)<br>Control (N=6)                                                                                                                                                                                                                               |             |        | OFF: total distance  , center time  <br>SPT: sucrose preference                                                                                                        |                                                                                                                                           |                |        |                                                                                                                             |       |                                       |                                                                                            |
| Li Y et al. 2018 <sup>[61]</sup>    | Sprague-Dawley rats | China | case-control | in groups       | CUS-depression            | CUS+Saline (N=8)<br>CUS+high-dose CTE (N=8)<br>CUS+low-dose CTE (N=8)<br>CUS+Fluoxetine (N=8)<br>Control+Saline (N=8)                                                                                                                                               | 200 ± 20 g  | male   | SPT: sucrose preference  <br>OFF: total distance  <br>NSF: latency to eat                                                                                              | After 1 week of acclimatization and 4 weeks of CUS                                                                                        | Fecal samples  | -80 °C | 16S rRNA gene sequencing- Illumina MiSeq platform                                                                           | V3-V4 | CUS-depression and control            | Metastats: p < 0.05                                                                        |
| Lim EY et al. 2021 <sup>[52]</sup>  | Sprague Dawley rats | Korea | case-control | 10-11 rats/cage | Ovariectomy-depression    | Experiment 1:<br>Ovariectomy (N=11)<br>Control (N=11)<br><br>Experiment 2:<br>Ovariectomy (N=10)<br>Ovariectomy+17β-oestradiol (N=10)<br>Ovariectomy+vSL#3 (N=10)<br>Ovariectomy+L. intestinalis (N=11)<br>Ovariectomy+L. intestinalis YT2 (N=11)<br>Control (N=10) | 10-week-old | female | Body weight  <br>FST: immobility time                                                                                                                                  | Faecal samples (0.5 g) were collected at 0, 1, 3, 6, 10, 14, 18 week after ovariectomy                                                    | Fecal samples  | -      | 16S rRNA gene sequencing- high-sensitivity DNA chips and the Biosanalyzer 2100 (Agilent Technologies, Santa Clara, CA, USA) | V1-V2 | Ovariectomy-depression and control    | Wilcoxon rank-based test: p < 0.05<br>LEISe: p < 0.05 and LDA > 3.0                        |
| Liu S et al. 2021 <sup>[53]</sup>   | ICR mice            | China | case-control | 5 mice/cage     | CRS-depression            | CRS (N=10)<br>CRS+low-dose crocetin (N=10)<br>CRS+middle-dose crocetin (N=10)<br>CRS+high-dose crocetin (N=10)<br>CRS+fluoxetine (N=10)<br>Control (N=10)                                                                                                           | 2-week-old  | male   | Body weights  <br>TST: latency time  , immobility time  <br>OFF: crossing number  , fecal number                                                                       | After 28 days of CRS (before the behavioral tests)                                                                                        | Fecal samples  | -80 °C | 16S rRNA gene sequencing- Illumina MiSeq 16S Metagenomic Sequencing Library Preparation protocol                            | V3-V4 | CRS-depression and control            | Student's t test: p < 0.05                                                                 |
| Liu QF et al. 2020 <sup>[54]</sup>  | ICR mice            | Korea | case-control | -               | IS-depression             | IS (N=10)<br>IS+Fluoxetine (N=10)<br>IS+Probiotic (N=10)<br>Control (N=10)                                                                                                                                                                                          | 6-week-old  | male   | FST: immobility time  , swimming time  <br>TST: immobility time  <br>OFF: total distance  , periphery and center distance  <br>EPM: closed arms time  , open arms time | After 1 week of acclimatization, fecal samples were collected on day 60 after immobilization stress and fluoxetine or probiotic treatment | Fecal samples  | -70 °C | 16S rRNA gene sequencing- Illumina MiSeq platform                                                                           | V4-V5 | IS-depression and control             | Student's t test: p < 0.05                                                                 |
| Liu X et al. 2021a <sup>[55]</sup>  | C57BL/6 mice        | China | case-control | Single          | CUMS-depression           | CUMS+inosine (N=30)<br>CUMS (N=30)<br>Control (N=15)                                                                                                                                                                                                                | PND21       | male   | Body weights  <br>SPT: sucrose preference  <br>OFF: total distance  <br>EPM: open arms time  , closed arms time                                                        | After 1 week of acclimatization and 4 weeks of CUMS and inosine treatment                                                                 | Fecal samples  | -80°C  | 16S rRNA gene sequencing- Illumina MiSeq platform                                                                           | V3-V4 | CUMS-depression and control           | LEISe: p < 0.05 and LDA > 2.0                                                              |
| Liu XJ et al. 2021b <sup>[56]</sup> | Sprague-Dawley rats | China | case-control | -               | CUMS-depression           | CUMS (N=6)<br>CUMS+Venlafaxine (N=6)<br>CUMS+Xiaryassan (N=6)<br>CUMS+Shugan (N=6)<br>CUMS+Jiampi (N=6)<br>Control (N=6)                                                                                                                                            | 6-week-old  | male   | Body weights  <br>SPT: sucrose preference  <br>FST: immobility time                                                                                                    | After 1 week of acclimatization and 4 weeks of CUMS and drugs treatment                                                                   | Cecal contents | -80°C  | 16S rRNA gene sequencing- Illumina MiSeq platform                                                                           | V3-V4 | CUMS-depression and control           | One-way ANOVA followed by Tukey's post hoc test: p < 0.05<br>LEISe: p < 0.05 and LDA > 2.0 |
| Liu Z et al. 2020 <sup>[57]</sup>   | C57BL/6J mice       | China | case-control | 4 mice/cage     | HFD-postpartum depression | HFD (N=12)<br>HFD+Inulin (N=12)                                                                                                                                                                                                                                     | 2-month-old | female | MWM: escape time  , target quadrant distance                                                                                                                           | Once the 21-day lactation was over                                                                                                        | Fecal samples  | -80 °C | 16S rRNA gene sequencing- Illumina MiSeq                                                                                    | V3-V4 | HFD-postpartum depression and control | LDISe: p < 0.05 and LDA > 3.0                                                              |

|                                                |                     |       |              |               |                        |                                                                                                                         |            |      |  |                                                                                                                                     |                                                                                                                                                                                                                                                             |                                                    |        |                                                          |       |                                            |                                                                       |
|------------------------------------------------|---------------------|-------|--------------|---------------|------------------------|-------------------------------------------------------------------------------------------------------------------------|------------|------|--|-------------------------------------------------------------------------------------------------------------------------------------|-------------------------------------------------------------------------------------------------------------------------------------------------------------------------------------------------------------------------------------------------------------|----------------------------------------------------|--------|----------------------------------------------------------|-------|--------------------------------------------|-----------------------------------------------------------------------|
|                                                |                     |       |              |               |                        | Control (N=12)<br>Control-Inulin (N=12)                                                                                 |            |      |  | TST: immobility time†<br>OFT: crossing number ‡                                                                                     |                                                                                                                                                                                                                                                             |                                                    |        |                                                          |       |                                            |                                                                       |
| Lao X et al. 2021 <sup>[91]</sup>              | C57BL/6J mice       | China | case-control | -             | EMF-induced-depression | Electromagnetic field exposure (EMF) (N=10)<br>EMF+Heat acclimation (N=10)<br>Heat acclimation (N=10)<br>Control (N=10) | 8-week-old | male |  | FST: immobility time†<br>TST: immobility time†                                                                                      | After 28 days of ambient temperature, the fecal samples were collected after 5 weeks of EMF                                                                                                                                                                 | Fecal samples                                      | -80 °C | 16S rRNA sequencing analysis-Illumina MiSeq platform     | V4    | EMF-depression and control                 | LEISe: p < 0.05 and LDA > 2.0                                         |
| Lv M et al. 2021 <sup>[92]</sup>               | Sprague-Dawley rats | China | case-control | -             | CUMS-depression        | CUMS (N=6)<br>CUMS+Venlafaxine (N=6)<br>CUMS+Xiaoyaoan (N=6)<br>Control (N=6)                                           | 200 ± 20 g | male |  | Body weights‡<br>SPT: sucrose preference‡<br>OFT: total distances and rearings number ‡<br>FST: immobility time†                    | After 1 week of acclimatization and 4 weeks of CUMS                                                                                                                                                                                                         | Cecal contents                                     | -80 °C | 16S rRNA gene sequencing-Illumina MiSeq platform         | V3-V4 | CUMS-depression and control                | LEISe: p < 0.05 and LDA > 2.0<br>Random Forests                       |
| Lv WJ et al. 2019 <sup>[93]</sup>              | Sprague-Dawley rats | China | case-control | Single        | CUMS-depression        | CUMS (N=6)<br>Control (N=6)<br><br>ABX FMT-CUMS (N=6)<br>ABX FMT-Control (N=6)                                          | 8-week-old | male |  | Body weight‡<br>SPT: sucrose preference‡<br>OFT: center time‡<br>TST: immobility time†                                              | After 1 week of acclimatization and 4 weeks of CUMS<br><br>-                                                                                                                                                                                                | Fecal samples                                      | -80 °C | 16S rRNA gene sequencing-Unspecified                     | V3-V4 | CUMS-depression and control                | LEISe: p < 0.05 and LDA > 3.0                                         |
| Lv WJ et al. 2020 <sup>[94]</sup>              | Sprague-Dawley rats | China | case-control | -             | DSS-depression         | DSS (N=5)<br>DSS+Melatonin (N=6)<br>Control (N=7)                                                                       | 6-week-old | male |  | SPT: sucrose preference rates‡<br>OFT: center time‡<br>FST: immobility time†                                                        | The fecal samples were collected after 7 weeks of DSS and 2 weeks of recovery                                                                                                                                                                               | Fecal samples                                      | -80°C  | 16S rRNA gene sequencing-                                | V4-V5 | DSS-depression and control                 | One-way ANOVA followed by Bonferroni's post hoc test: p < 0.05        |
| Mu W et al. 2019 <sup>[95]</sup>               | Wistar rats         | China | case-control | Single        | PSD-depression         | 7d-PSD (N=10)<br>Control (N=10)                                                                                         | 240 ± 10 g | male |  | OFT: total behavioral score‡<br>FST: immobility time†<br>TST: immobility time†<br>SPT: sucrose preference‡                          | After 1 week of acclimatization and 7 days of paradoxical sleep deprivation                                                                                                                                                                                 | Fecal samples                                      | -80 °C | 16S rRNA gene sequencing-Illumina MiSeq platform         | V4    | PSD-depression and control                 | Nonparametric Mann-Whitney U test: p < 0.05                           |
| Marin IA et al. 2017 <sup>[96]</sup>           | C57BL/6 mice        | USA   | case-control | 2-3 mice/cage | UCMS-depression        | UCMS (N=12)<br>Control (N=11)                                                                                           | 8-week-old | male |  | FST: escape behavior‡                                                                                                               | After 1 week of acclimatization and 5 weeks of UCMS                                                                                                                                                                                                         | Fecal samples                                      | -      | 16S rRNA gene sequencing-Illumina MiSeq platform<br>qPCR | V3-V4 | UCMS-depression and control                | Two-tailed t-test with Welch's correction: p < 0.05                   |
| Martin-Hernandez D et al. 2016 <sup>[97]</sup> | Wistar rats         | Spain | case-control | Single        | CMS-depression         | CMS (N=9)<br>CMS+Antibiotics (N=10)<br>Control (N=8)                                                                    | 200-225g   | male |  | Weight gain‡<br>FST: immobility time†<br>SPT: sucrose consumption‡<br>Splash test: latency time‡<br>EPM: open arms time percentage‡ | After 2 week of acclimatization and 3 weeks of CMS and antibiotics treatment                                                                                                                                                                                | Blood, mesenteric lymph nodes (MLN), liver, spleen | -      | Bacterial ecosystems analysis,                           | -     | CMS-depression and control                 | -                                                                     |
| Matoudu Y et al. 2020 <sup>[98]</sup>          | Sprague-Dawley rats | Japan | case-control | Single        | CSDS-depression        | CSDS (N=6)<br>Control (N=6)                                                                                             | 8-week-old | male |  | SIT: social target‡                                                                                                                 | Fresh fecal samples were collected before the first SDS application (before), 1 day (stress 2d), 4 days (stress 5d), and 10 days (stress 11d) after the first SDS application, and 1 day (after stress), 7 days (1 W), and 1 month (1 M) after the last SDS | Fecal samples                                      | -80 °C | 16S rRNA gene sequencing-Illumina MiSeq platform         | V3-V4 | CSDS-depression and control (after stress) | Two-way ANOVA followed by Sidak's multiple comparisons test: p < 0.05 |

|                                                 |                     |         |              |             |                 |                                                                                                                                                                                                                                                                  |                |             |                                                                                                                                    |                                                                                                                                                                                                                                                                                                        |               |        |                                                        |       |                                                               |                                                                                                 |
|-------------------------------------------------|---------------------|---------|--------------|-------------|-----------------|------------------------------------------------------------------------------------------------------------------------------------------------------------------------------------------------------------------------------------------------------------------|----------------|-------------|------------------------------------------------------------------------------------------------------------------------------------|--------------------------------------------------------------------------------------------------------------------------------------------------------------------------------------------------------------------------------------------------------------------------------------------------------|---------------|--------|--------------------------------------------------------|-------|---------------------------------------------------------------|-------------------------------------------------------------------------------------------------|
| McGaughy KD et al. 2019 <sup>[91]</sup>         | C57BL/6J mice       | USA     | case-control | Single      | CSDS-depression | CSDS (N=20)<br>Control (N=19)                                                                                                                                                                                                                                    | 6-week-old     | male        | OFF: total distance ↓, vertical activity ↓,<br>center time ↓, corner time ↑<br>SPT: sucrose preference ↓<br>FST: immobility time ↑ | 24hr before the start of the social defeat trials and 24hr after the social interaction testing (after 7 days of acclimatization and 7 days of CSDS)                                                                                                                                                   | Fecal samples | -80 °C | 16S rRNA gene sequencing-<br>Illumina MiSeq platform   | V3-V4 | CSDS-depression and control                                   | Wilcoxon Rank Sum and<br>Kruskal-Wallis tests followed by a Dunn's post-test: p < 0.05          |
| Medina-Rodriguez EM et al. 2020 <sup>[71]</sup> | C57BL/6 mice        | USA     | case-control | -           | LH-depression   | LH (N=5)<br>Non-LH (N=5)<br>Control (N=3)                                                                                                                                                                                                                        | 6-12-week-old  | male        | Escape failures ↑<br>Learned helplessness: ↑                                                                                       | Stools immediately after exposure to escapable foot shocks                                                                                                                                                                                                                                             | Fecal samples | -80 °C | 16S rRNA gene sequencing-<br>Illumina MiSeq instrument | V4    | LH-depression and control                                     | Kruskal-Wallis rank sum test with Bonferroni correction: p < 0.05                               |
| Meng C et al. 2022 <sup>[91]</sup>              | Sprague-Dawley rats | China   | case-control | -           | CUMS-depression | CUMS (N=20)<br>CUMS+Antibiotics (N=20)<br>Control (N=20)                                                                                                                                                                                                         | 6-week-old     | male        | FST: immobility time ↑, swimming time ↓                                                                                            | After 1 week of acclimatization and 4 weeks of CUMS, fresh feces samples were collected at end of short-term antibiotics exposure period (at week 5) and long-term antibiotics exposure period (at week 9)                                                                                             | Fecal samples | -80 °C | 16S rRNA gene sequencing-<br>Illumina NovaSeq platform | V3-V4 | CUMS-depression and control (short-term antibiotics exposure) | One-way ANOVA with a Duncan's test: p < 0.05                                                    |
| Moya-Pérez A et al. 2017 <sup>[91]</sup>        | C57BL/6J mice       | Spain   | case-control | -           | MS-depression   | MS (N=18)<br>MS+Bifidobacterium (N=18)<br>Control (N=18)<br>Control+Bifidobacterium (N=18)                                                                                                                                                                       | PND21<br>PND40 | male        | EPM: open arms time ↓                                                                                                              | After maternal separation (PND2: 21), stool samples were collected at PND21 and PND40                                                                                                                                                                                                                  | Fecal samples | -80°C  | 16S rRNA gene sequencing-<br>Illumina MiSeq platform   | V4-V5 | MS-depression and control (PND21)                             | Wilcoxon Ranks Sum test with post hoc Bonferroni test: p < 0.05                                 |
| Murray E et al. 2019 <sup>[91]</sup>            | CD-1 mice           | Canada  | case-control | 2 mice/cage | LPS-depression  | Acute effect for both male and female:<br>LPS (N=10)<br>LPS+Probiotic (N=10)<br>Control (N=10)<br>Control+Probiotic (N=10)<br><br>Long term effect for both male and female:<br>LPS (N=10)<br>LPS+Probiotic (N=10)<br>Control (N=10)<br>Control+Probiotic (N=10) | 3-week-old     | male/female | FST: immobility time ↑<br>OFF: center time ↓<br>EPM: open arms time ↓                                                              | Fecal samples were collected at five time points; 5 weeks of age (before probiotic treatment), 6 weeks of age (after 1 week of probiotics and just before LPS injection), 24 h after LPS injection, 7 weeks of age (at the end of two-week course of probiotic treatment), 10 weeks of age (adulthood) | Fecal samples | -80°C  | 16S rRNA gene sequencing-<br>Illumina MiSeq platform   | V6-V8 | LPS-depression and control                                    | Three-way mixed ANOVA: p < 0.05                                                                 |
| O'Mahony SM et al. 2020 <sup>[91]</sup>         | Sprague-Dawley rats | Ireland | case-control | 3 rats/cage | MS-depression   | MS (N=12)<br>MS+MFGM (N=12)<br>MS+Probiotic (N=12)<br>MS+MFGM+Probiotic (N=12)<br>Control (N=12)<br>Control+MFGM (N=12)<br>Control+Probiotic (N=12)<br>Control+MFGM+Probiotic (N=12)                                                                             | 14-week-old    | male        | NOR: discriminate ability ↓                                                                                                        | After maternal separation (PND2: 12), stool samples were collected at the end of the study (weeks 14)                                                                                                                                                                                                  | Fecal samples | -80°C  | 16S rRNA gene sequencing-<br>Illumina MiSeq platform   | V3-V4 | MS-depression and control                                     | Rank Kruskal-Wallis test followed by Dunn's test with false discovery rate adjustment: q < 0.05 |



|                                              |                                        |         |              |               |                                                           |                                                                                                                                                                                                                                                                                                    |             |        |                                                                                                                                                                                                                                               |                                                                                                                                                              |                                                       |        |                                                                                                                                            |                |                                                                                    |                                                                                                                  |
|----------------------------------------------|----------------------------------------|---------|--------------|---------------|-----------------------------------------------------------|----------------------------------------------------------------------------------------------------------------------------------------------------------------------------------------------------------------------------------------------------------------------------------------------------|-------------|--------|-----------------------------------------------------------------------------------------------------------------------------------------------------------------------------------------------------------------------------------------------|--------------------------------------------------------------------------------------------------------------------------------------------------------------|-------------------------------------------------------|--------|--------------------------------------------------------------------------------------------------------------------------------------------|----------------|------------------------------------------------------------------------------------|------------------------------------------------------------------------------------------------------------------|
| Osman A et al. 2021 <sup>[106]</sup>         | Wistar albino rats                     | USA     | case-control | 8 rats/cage   | Casein-depression<br><br>A1/A2 $\beta$ -casein-depression | Casein experiment:<br>Weaned-Casein-rich milk (N=8)<br>Weaned-Casein-free milk (N=8)<br>Weaned-Control (N=8)<br><br>A1/A2 milk experiment:<br>Weaned+A1/A2 $\beta$ -casein milk (N=8)<br>Weaned+A2 $\beta$ -casein milk (N=8)<br>Weaned-Control (N=8)                                              | PND25       | male   | FST: immobility time <sup>†</sup>                                                                                                                                                                                                             | Fecal samples were collected at PND25                                                                                                                        | Contents of duodenum, jejunum, ileum, cecum and colon | -      | Fluorescence in situ Hybridization (FISH) analysis for Bifidobacterium spp., Clostridium_histolyticum_group, Lactobacilli Enterococci spp. | -              | Casein-rich-depression and Casein-free control                                     | Wilcoxon test followed by Benjamini-Hochberg: $p < 0.05$                                                         |
| Partrick KA et al. 2021 <sup>[107]</sup>     | Syrian hamsters (Mesocricetus auratus) | USA     | case-control | Single        | CSDS-depression                                           | Acute CSDS+Placebo (N=20)<br>Acute CSDS-low probiotic (N=10)<br>Acute CSDS-high probiotic (N=20)<br>Repeat CSDS+Placebo (N=20)<br>Repeat CSDS+low probiotic (N=10)<br>Repeat CSDS+high probiotic (N=20)<br>Control+Placebo (N=20)<br>Control+low probiotic (N=10)<br>Control+high probiotic (N=20) | 3-month-old | male   | SBT: Avoidance behavior <sup>†</sup> , Interaction <sup>†</sup>                                                                                                                                                                               | Prior to the initial defeat (baseline samples), 24 h after the acute defeat (acute defeat samples), and 24 h after the final defeat (repeated defeat sample) | Fecal samples                                         | -80 °C | 16S rRNA gene sequencing-Illumina MiSeq platform<br><br>qPCR                                                                               | V3-V4          | CSDS-depression and control                                                        | Nonparametric Kruskal-Wallis with Dunn's multiple comparisons test: $p < 0.05$<br>LEIS: $p < 0.05$ and LDA > 2.0 |
| Patterson E et al. 2019 <sup>[94]</sup>      | C57BL/6J mice                          | Ireland | case-control | 3-4 mice/cage | HFD-depression                                            | HFD (N=14)<br>HFD+ L. brevis DPC6108 (N=14)<br>HFD+L. brevis DSM32386 (N=14)<br>LFD (N=14)                                                                                                                                                                                                         | 3-week-old  | male   | Body weight <sup>†</sup><br>FST: immobility time <sup>†</sup>                                                                                                                                                                                 | After 5 week of acclimatization, 24 weeks of high fat feeding (the last 12 weeks received L. brevis intervention)                                            | Caecal contents                                       | -      | 16S rRNA gene sequencing-Illumina MiSeq platform                                                                                           | V3-V4          | HFD-depression and LFD-control                                                     | One-way ANOVA: $p < 0.05$                                                                                        |
| Pearson-Leary J et al. 2020 <sup>[105]</sup> | Sprague-Dawley rats                    | USA     | case-control | Single        | CSDS-depression                                           | CSDS-vulnerable (N=9)<br>CSDS-resilient (N=10)<br>Control (N=8)<br><br>FMT-CSDS-vulnerable (N=13)<br>FMT-CSDS-resilient (N=13)<br>FMT-Control (N=14)<br>Control (N=15)                                                                                                                             | 275-300g    | male   | Rats exhibiting passive behavior and shortlatencies (SL/vulnerable) to defeat exhibit increased anxiety- and depressive-like behaviors<br>FST: latency to immobility <sup>†</sup> , immobility time <sup>†</sup> , swimming time <sup>†</sup> | At 24 h before the first social defeat (day 0) and 24 h after the 7th episode of social defeat (30 min/day)(day 8)                                           | Fecal samples                                         | -80 °C | Shotgun metagenome sequencing-Illumina HiSeq 2500<br><br>16S rRNA gene sequencing-Illumina MiSeq                                           | -<br><br>V1-V2 | CSDS-depression vulnerable and control                                             | Wilcoxon rank sum test: adjust $p < 0.05$                                                                        |
| Pu Y et al. 2021 <sup>[106]</sup>            | C57BL/6 mice                           | Japan   | case-control | 4-5/cage      | Chrm7 KO-depression<br><br>FMT-Chrm7 KO-depression        | Chrm7 KO (N=10)<br>Wild-type (N=10)<br><br>ABX FMT-Chrm7 KO (N=10)<br>ABX FMT-wild-type (N=10)                                                                                                                                                                                                     | 8-week-old  | male   | FST: immobility time <sup>†</sup><br>TST: immobility time <sup>†</sup><br>SPT: sacrose preference <sup>†</sup>                                                                                                                                | At around 10:00 for KO mice<br><br>After 14 days of antibiotics treatment and 14 days of FMT                                                                 | Fecal samples                                         | -80 °C | 16S rRNA sequencing analysis-MyMetagenome Co., Ltd. (Tokyo, Japan)                                                                         | Unspecified    | Chrm7 KO-depression and wild-type<br><br>FMT-Chrm7 KO-depression and FMT-wild-type | LEIS: $p < 0.05$ and LDA > 2.0                                                                                   |
| Puscoddu MM et al. 2015 <sup>[97]</sup>      | Sprague-Dawley rats                    | Ireland | case-control | 5 rats/cage   | MS                                                        | MS (N=10)<br>MS+EPA/DHA low-dose (N=10)<br>MS+EPA/DHA high-dose (N=10)<br>Control (N=10)                                                                                                                                                                                                           | 17-week-old | female | NA                                                                                                                                                                                                                                            | After maternally separation stress (PND2-12) and EPA/DHA treatment (weeks 5-17), faecal pellets were collected at weeks 17 from female rats                  | Fecal samples                                         | -80 °C | 16S rDNA gene sequencing-Illumina MiSeq platform                                                                                           | Unspecified    | MS and control                                                                     | Wilcoxon rank test: $p < 0.05$                                                                                   |

|                                     |                             |       |              |        |                                                          |                                                                                                                            |                 |      |                                                                                                                                                                          |                                                                                                                                                                                 |                     |        |                                                                                                                                |       |                                                                                              |                                                                                               |  |
|-------------------------------------|-----------------------------|-------|--------------|--------|----------------------------------------------------------|----------------------------------------------------------------------------------------------------------------------------|-----------------|------|--------------------------------------------------------------------------------------------------------------------------------------------------------------------------|---------------------------------------------------------------------------------------------------------------------------------------------------------------------------------|---------------------|--------|--------------------------------------------------------------------------------------------------------------------------------|-------|----------------------------------------------------------------------------------------------|-----------------------------------------------------------------------------------------------|--|
|                                     |                             |       |              |        |                                                          | Control+EPADHA low-dose (N=10)<br>Control+EPADHA high-dose (N=10)                                                          |                 |      |                                                                                                                                                                          |                                                                                                                                                                                 |                     |        |                                                                                                                                |       |                                                                                              |                                                                                               |  |
| Qiao Y et al. 2020 <sup>[106]</sup> | Kunming mice                | China | case-control | -      | CRS-depression<br>CUMS-depression<br>CRS+CUMS-depression | CRS (N=10)<br>CUMS (N=10)<br>CRS+CUMS (N=10)<br>Control (N=10)                                                             | 8-week-old      | male | Body weight <br>Food consumption <br>SPT: sucrose preference <br>FST: immobility time <br>TST: immobility time <br>OFT: rest time , move time , center time and distance | After 1 week of acclimatization and 3 weeks of stress                                                                                                                           | Rectal contents     | -80 °C | 16S rRNA gene sequencing-<br>Illumina MiSeq platform                                                                           | V3-V4 | CRS-depression and control<br>CUMS-depression and control<br>CRS+CUMS-depression and control | Multiple t-test: p <0.05<br>LEISr: p < 0.05 and LDA > 2.0                                     |  |
| Qiu X et al. 2021 <sup>[109]</sup>  | C57BL/6J mice               | China | case-control | Single | LPS-depression                                           | LPS (N=8)<br>LPS+Lactobacillus (N=8)<br>Control (N=8)<br>Control+Lactobacillus (N=8)                                       | 8-week-old      | -    | SPT: sucrose preference <br>FST: immobility time                                                                                                                         | After 7 days of acclimatization, followed by LPS and 7 days of Lactobacillus treatment                                                                                          | Fecal samples       | -      | qPCR                                                                                                                           | -     | LPS-depression and control                                                                   | Two-way ANOVA followed by least significant difference (LSD) post-hoc test: p < 0.05          |  |
| Qu W et al. 2019 <sup>[108]</sup>   | Sprague-Dawley rats         | China | case-control | Single | CUMS-depression                                          | CUMS-susceptible (N=6)<br>CUMS-susceptible+TCM (N=19)<br>Control (N=12)                                                    | adult 180-220 g | male | SPT: sucrose preference <br>OFT: rearing and crossing numbers <br>LDT: dark zone time                                                                                    | At least 2 fecal pellets were obtained from each rat in Week 9 and 15.                                                                                                          | Fecal samples       | -80°C  | 16S rRNA gene sequencing-<br>Illumina HiSeq 2500 platform<br><br>Shotgun metagenomic analysis-<br>Illumina HiSeq 4000 platform | V4-V5 | CUMS-depression and control                                                                  | One-way ANOVA followed by the LSD test: p < 0.05                                              |  |
| Qu Y et al. 2017 <sup>[111]</sup>   | C57BL/6 mice                | Japan | case-control | Single | CSDS-depression                                          | CSDS susceptible+Saline (N=6)<br>CSDS susceptible+(R)-ketamine (N=6)<br>CSDS susceptible+Lanicemine (N=6)<br>Control (N=6) | 8-week-old      | male | FST: immobility time <br>TST: immobility time <br>SPT: sucrose preference                                                                                                | After 10 days of CSDS and 3 days after a single dose of drugs                                                                                                                   | Fecal samples       | -80 °C | 16S rRNA gene sequencing-<br>Illumina MiSeq 16S<br>Metagenomic Sequencing                                                      | V4    | CSDS-depression susceptible and control                                                      | One-way ANOVA followed by post-hoc Tukey test: p < 0.05                                       |  |
| Qu Y et al. 2020 <sup>[112]</sup>   | C57BL/6 mice                | Japan | case-control | -      | CSDS-depression                                          | CSDS (N=9)<br>CSDS+Betaine (N=9)<br>Control (N=11)<br>Control+Betaine (N=11)                                               | 8-week-old      | male | SPT: sucrose preference                                                                                                                                                  | After 24 days of betaine treatment (day1-24) and 10 days of CSDS (day15-24), fecal samples were collected at day25                                                              | Fecal samples       | -80°C  | 16S rRNA gene sequencing-                                                                                                      | V3-V4 | CSDS-depression and control                                                                  | Two-way ANOVA followed by post-hoc Fisher's Least Significant Difference (LSD) test: p < 0.05 |  |
| Qu Y et al. 2022 <sup>[113]</sup>   | ICR mice                    | China | case-control | Single | CUMS-depression                                          | CUMS (N=12)<br>Control (N=12)                                                                                              | 7 weeks old     | male | Body weight <br>SPT: sugar preference <br>FST: immobility time <br>TST: immobility time                                                                                  | After 1 week of acclimatization and 8 weeks of CUMS                                                                                                                             | Intestinal contents | -80 °C | 16S rDNA gene sequencing-<br>Illumina MiSeq platform                                                                           | V3-V4 | CUMS-depression and control                                                                  | Pearson's correlation analysis: p < 0.05                                                      |  |
| Rao J et al. 2021 <sup>[114]</sup>  | Sprague-Dawley rats         | China | case-control | -      | CUMS-depression                                          | CUMS (N=6)<br>CUMS+FMT-control (N=6)<br>Control (N=6)                                                                      | 180 ± 20 g      | male | SPT: sucrose preference <br>FST: immobility time                                                                                                                         | After 1 week of acclimatization, 4 weeks of CUMS and 2 weeks of fecal microbiota transplantation treatment                                                                      | Colonic contents    | -80°C  | 16S rRNA gene sequencing-<br>Illumina MiSeq platform                                                                           | V3-V4 | CUMS-depression and control                                                                  | Kruskal-Wallis test: p < 0.05                                                                 |  |
| Ray P et al. 2021 <sup>[115]</sup>  | C57BL/6 mice<br>BALB/c mice | India | case-control | -      | Vancomycin-depression                                    | Vancomycin (N=6)<br>Control (N=6)                                                                                          | 6-8-week-old    | male | EPM: closed arms time <br>OFT: center time <br>FST: immobility time                                                                                                      | Fresh cecal samples were collected everyday till 6th day (total of six time points) during perturbation and four time points of restoration (on 15th, 30th, 45th, and 60th day) | Cecal contents      | -      | 16S rRNA gene sequencing-<br>Illumina MiSeq platform                                                                           | V3-V4 | Vancomycin-depression and control                                                            | ANOVA: p < 0.05                                                                               |  |

|                                         |                     |         |              |               |                                |                                                                                                                                                                                                                                                          |                     |             |                                                                                                                                                                                                                                          |                                                                                                                                        |                |       |                                                  |       |                                                         |                                                                                                |
|-----------------------------------------|---------------------|---------|--------------|---------------|--------------------------------|----------------------------------------------------------------------------------------------------------------------------------------------------------------------------------------------------------------------------------------------------------|---------------------|-------------|------------------------------------------------------------------------------------------------------------------------------------------------------------------------------------------------------------------------------------------|----------------------------------------------------------------------------------------------------------------------------------------|----------------|-------|--------------------------------------------------|-------|---------------------------------------------------------|------------------------------------------------------------------------------------------------|
| Robertson RC et al. 2017 <sup>114</sup> | C57BL/6J mice       | Ireland | case-control | 3-4 mice/cage | n-3 PUFA deficiency-depression | n-3 PUFA supplement (N=10)<br>n-3 PUFA deficiency (N=10)<br>Control (N=10)                                                                                                                                                                               | 13-week-old         | male        | FST: immobility time <sup>†</sup><br>Three chamber test: time interaction with object <sup>†</sup> , time interaction with mouse <sup>†</sup>                                                                                            | Fecal samples were collected after 13 weeks of dietary treatment                                                                       | Fecal samples  | ~20°C | 16S rRNA gene sequencing-Illumina MiSeq platform | V3-V4 | n-3 PUFA deficiency-depression and control (adult only) | Kruskal-Wallis tests followed by Mann-Whitney tests: p < 0.05<br>LEISe: p < 0.05 and LDA > 2.0 |
| Rosa JM et al. 2020 <sup>117</sup>      | Swiss mice          | Brazil  | case-control | 10 mice/cage  | Aβ1-40-depression              | Aβ1-40 (N=8)<br>Aβ1-40+Exercise (N=8)<br>Control (N=8)<br>Control+Exercise (N=8)                                                                                                                                                                         | 30-40 g, 45-55 days | male        | FST: immobility time <sup>†</sup><br>FUST: sniffing time <sup>†</sup>                                                                                                                                                                    | After 1 week of acclimatization and 28 days of treadmill exercise (Aβ1-40 injection at day 18)                                         | Colon contents | ~80°C | RT-qPCR for Firmicutes and Bacteroidetes         | -     | Aβ1-40-depression and control                           | Two-way ANOVA followed by Duncan's multiple range post hoc test: p < 0.05                      |
| Schmidner AK et al. 2019 <sup>116</sup> | NAB/HAB rats        | Germany | case-control | 3-4 rats/cage | HAB-depression                 | HAB (N= no data)<br>HAB-Mnocyline (N= no data)<br>HAB+Escitalopram (N= no data)<br>HAB-Mnocyline+Escitalopram (N= no data)<br>NAB (N= no data)<br>NAB-Mnocyline (N= no data)<br>NAB+Escitalopram (N= no data)<br>NAB-Mnocyline+Escitalopram (N= no data) | 11-12-week-old      | male/female | FST: struggling score <sup>†</sup> , immobility score <sup>†</sup><br>LDT: light box time <sup>†</sup> , distance traveled <sup>†</sup><br>EPM: open arms time <sup>†</sup>                                                              | After 14 days of drugs injection                                                                                                       | Cecum contents | ~80°C | 16S rDNA gene sequencing-454 pyrosequencing      | V3-V6 | HAB-depression and NAB control                          | ANOVA with a subsequent Tukey's test: p < 0.05                                                 |
| Shan B et al. 2021 <sup>118</sup>       | Sprague-Dawley rats | China   | case-control | -             | CUS-depression                 | Experiment 1:<br>CUS (N=15)<br>Control (N=10)<br><br>Experiment 2:<br>ABX (N=8-10)<br>ABX FMT-CUS (N=8-10)<br>ABX FMT-Control (N=8-10)<br>D-lactic acid (N=8-10)<br>L-lactic acid (N=8-10)<br>Control (N=8-10)                                           | 180-220 g           | male        | OFT: center time <sup>†</sup><br>EPM: open arms time <sup>†</sup> , closed arms time <sup>†</sup><br>TST: immobility time <sup>†</sup><br>FST: immobility time <sup>†</sup>                                                              | After 1 week of acclimatization and 5 weeks of CUS                                                                                     | Fecal samples  | ~80°C | 16S rRNA gene sequencing-Illumina MiSeq platform | V3-V4 | CUS-depression and control                              | Wilcoxon rank-sum test: p < 0.05<br>LEISe: p < 0.05 and LDA > 2.0                              |
| Shao S et al. 2021 <sup>120</sup>       | C57BL/6 J mice      | China   | case-control | Single        | CRS-depression                 | CRS+CRS xenografts (N=5)<br>CRS+Fluoxetine+CRS xenografts (N=5)<br>CRS+XCHT-low+CRS xenografts (N=5)<br>CRS+XCHT-high+CRS xenografts (N=5)<br>Control+CRS xenografts (N=5)                                                                               | 6-7-week-old        | male        | SFP: sucrose preference <sup>†</sup><br>TST: immobility time <sup>†</sup>                                                                                                                                                                | After 7 days of acclimatization, 14 days of CRS, 25 days of behavioural tests, tumour cell injection, and fluoxetine or XCHT treatment | Fecal samples  | ~80°C | 16S rRNA gene sequencing-Illumina MiSeq platform | V3-V4 | CRS-depression and control                              | ANOVA test: p < 0.05                                                                           |
| Sheng L et al. 2021 <sup>121</sup>      | Sprague-Dawley rats | China   | case-control | -             | CUMS-depression                | CUMS (N=10)<br>CUMS+Fluoxetine (N=10)<br>CUMS+Exercise (N=10)<br>Control (N=10)                                                                                                                                                                          | 180 g               | female      | FST: swimming time <sup>†</sup> , resting time <sup>†</sup><br>TST: resting time <sup>†</sup><br>OFT: total distance <sup>†</sup> , peripheral distance <sup>†</sup><br>EPM: open arms time <sup>†</sup> , closed arms time <sup>†</sup> | Fecal samples were collected after 60 days of exercise                                                                                 | Fecal samples  | ~70°C | 16S rRNA gene sequencing-Illumina MiSeq platform | V4-V5 | CUMS-depression and control                             | Mann-Whitney nonparametric test: p < 0.05                                                      |
| Stopi E et al. 2020 <sup>122</sup>      | C57BL/6J mice       | France  | case-control | 5 mice/cage   | UCMS-depression                | Experiment 1:<br>UCMS (N=10)<br>Control (N=10)<br>ABX FMT-UCMS (N=10)                                                                                                                                                                                    | 8-week-old          | male        | TST: immobility time <sup>†</sup><br>FST: immobility time <sup>†</sup>                                                                                                                                                                   | After 9 week of UCMS (the last week were received behavioral testing)                                                                  | Fecal samples  | ~80°C | 16S rRNA gene sequencing-Illumina MiSeq platform | V3-V4 | UCMS-depression and control                             | ANOVA test: p < 0.05<br>FMT-UCMS-                                                              |

|                                       |               |       |              |        |                        |                                                                                                                                                                                                                                                                                                    |              |        |                                                                                                                                                                                |                                                                                                                                                   |               |        |                                                  |             |                                                             |                                                                                          |
|---------------------------------------|---------------|-------|--------------|--------|------------------------|----------------------------------------------------------------------------------------------------------------------------------------------------------------------------------------------------------------------------------------------------------------------------------------------------|--------------|--------|--------------------------------------------------------------------------------------------------------------------------------------------------------------------------------|---------------------------------------------------------------------------------------------------------------------------------------------------|---------------|--------|--------------------------------------------------|-------------|-------------------------------------------------------------|------------------------------------------------------------------------------------------|
|                                       |               |       |              |        | FMT-UCMS-depression    | <p>ABX FMT-Control (N=10)</p> <p>Experiment 2:<br/>UCMS (N=10)<br/>UCMS+Fluoxetine (N=12)<br/>Control (N=10)</p> <p>Experiment 3:<br/>ABX FMT-UCMS (N=15)<br/>ABX FMT-Control (N=13)<br/>ABX FMT-UCMS+Fluoxetine (N=10)<br/>ABX FMT-UCMS+5-HTP (N=10)<br/>ABX FMT-UCMS+Fluoxetine+5-HTP (N=10)</p> |              |        |                                                                                                                                                                                | After 1 week of ABX treatment, 4 days of microbiota transplantation, and 8 weeks of colonization (the last week were received behavioral testing) |               |        |                                                  |             | depression and FMT-control                                  |                                                                                          |
| Song J et al. 2019a <sup>[27]</sup>   | Wistar rats   | China | case-control | -      | ACTH-depression        | ACTH-treatment (N=10)<br>Control (N=10)                                                                                                                                                                                                                                                            | 10-week-old  | male   | FST: immobility time <sup>†</sup><br>TST: immobility time <sup>†</sup>                                                                                                         | After 14 days of ACTH treatment                                                                                                                   | Fecal samples | -80 °C | 16S rRNA gene sequencing-Illumina MiSeq platform | V3-V4       | ACTH-depression and control                                 | LEIS: p < 0.05 and LDA > 3.0                                                             |
| Song J et al. 2019b <sup>[28]</sup>   | Wistar rats   | China | case-control | -      | ACTH-depression        | ACTH (N=10)<br>ACTH+CGA (N=10)<br>control (N=10)                                                                                                                                                                                                                                                   | 10-week-old  | male   | SPT: sugar preference <sup>‡</sup><br>FST: immobility time <sup>†</sup><br>TST: immobility time <sup>†</sup><br>OFT: total distance <sup>‡</sup> , rearing number <sup>‡</sup> | After 7 days of acclimatization and 14 days of ACTH treatment                                                                                     | Fecal samples | -80 °C | 16S rRNA gene sequencing-Illumina MiSeq platform | V3-V4       | ACTH-depression and control                                 | LEIS: p < 0.05 and LDA > 3.0                                                             |
| Song X et al. 2021 <sup>[25]</sup>    | ICR mice      | China | case-control | Single | CUMS-depression        | CUMS (N=8)<br>CUMS+Fluoxetine (N=8)<br>CUMS+Puerarin low-dose (N=8)<br>CUMS+Puerarin high-dose (N=8)<br>Control (N=8)<br>Control+Fluoxetine (N=8)<br>Control+Puerarin high-dos (N=8)                                                                                                               | 20.0 ± 2.0 g | male   | SPT: sucrose preference <sup>‡</sup><br>FST: immobility time <sup>†</sup>                                                                                                      | After 1 week of acclimatization and 4 weeks of CUMS with drugs treatment                                                                          | Fecal samples | -80 °C | 16S rRNA gene sequencing-Illumina MiSeq platform | V3-V4       | CUMS-depression and control                                 | Kruskal-Wallis test with Bonferroni correction: p < 0.05<br>LEIS: p < 0.05 and LDA > 2.0 |
| Soviji WN et al. 2019 <sup>[29]</sup> | C57BL/6J mice | Japan | case-control | -      | Ovariectomy-depression | Experiment 1:<br>Ovariectomy (N=15)<br>Ovariectomy+Progesterone (N=15)                                                                                                                                                                                                                             | 6-week-old   | female | OFT: center time and entries <sup>‡</sup><br>FST: immobility time <sup>†</sup>                                                                                                 | After 2 weeks of recovery from ovariectomy (at 8-week-old of age) and 2 weeks of progesterone treatment                                           | Fecal samples | -      | 16S rRNA gene sequencing-Illumina MiSeq platform | V3-V4       | Ovariectomy-depression and ovariectomy+progesterone control | LEIS: p < 0.05 and LDA > 2.0                                                             |
| Sun L. et al. 2019a <sup>[27]</sup>   | C57/6 mice    | China | case-control | -      | CUMS-depression        | CUMS (N=10)<br>CUMS+Fluoxetine (N=10)<br>Control (N=10)                                                                                                                                                                                                                                            | 8-week-old   | male   | Body weight <sup>‡</sup><br>SPT: sucrose preference <sup>‡</sup><br>TST: immobility time <sup>†</sup><br>EPM: open arms time <sup>‡</sup>                                      | After 1 week of acclimatization and 5 weeks of CUMS                                                                                               | Fecal samples | -80 °C | 16S rRNA gene sequencing-Illumina MiSeq platform | Unspecified | CUMS-depression and control                                 | LEIS: Unspecified                                                                        |
| Sun L. et al. 2019b <sup>[28]</sup>   | C57BL/6 mice  | China | case-control | -      | Fto-KO anti-depression | Fto-KO (N=8)<br>Wild-type (N=8)                                                                                                                                                                                                                                                                    | 3-month-old  | male   | EPM: open arms time <sup>‡</sup><br>OFT: central time <sup>‡</sup><br>FST: floating time <sup>‡</sup>                                                                          | Unspecified                                                                                                                                       | Fecal samples | -80 °C | 16S rRNA gene sequencing-Illumina MiSeq platform | V3-V4       | Fto-KO anti-depression and wild-type                        | Wilcoxon rank sum test: p < 0.05                                                         |

|                                                |                      |        |              |               |                    |                                                                                                                                                                                                                                                              |              |      |                                                                                                    |                                                                                                                                             |                           |        |                                                                   |       |                                                              |                                                                     |
|------------------------------------------------|----------------------|--------|--------------|---------------|--------------------|--------------------------------------------------------------------------------------------------------------------------------------------------------------------------------------------------------------------------------------------------------------|--------------|------|----------------------------------------------------------------------------------------------------|---------------------------------------------------------------------------------------------------------------------------------------------|---------------------------|--------|-------------------------------------------------------------------|-------|--------------------------------------------------------------|---------------------------------------------------------------------|
|                                                |                      |        |              |               |                    | Pto-KO (N=7)<br>wild-type (N=7)                                                                                                                                                                                                                              |              |      |                                                                                                    |                                                                                                                                             |                           |        | Metagenomic-Illumina<br>Hiseq2500 Microbiome<br>Profiling setup   | -     |                                                              |                                                                     |
| Sun X et al.<br>2021 <sup>[170]</sup>          | C57BL/6 mice         | China  | case-control | 3-4 mice/cage | CRS-depression     | CRS (N=10)<br>CRS-WLPLD4 (N=10)<br>Control (N=10)                                                                                                                                                                                                            | 4-week-old   | male | OF1: center time  <br>EPM: open arms time and entries  <br>FST: immobility time                    | After 4 weeks of CRS                                                                                                                        | Fecal samples             | -      | 16S rRNA gene sequencing-<br>Illumina MiSeq platform              | V3-V4 | CRS-depression and control                                   | One-way ANOVA: p < 0.05                                             |
| Sun Y et al.<br>2019 <sup>[170]</sup>          | Kunming mice         | China  | case-control | -             | CUMS-depression    | CUMS (N=8)<br>CUMS+Fluoxetine (N=8)<br>CUMS+low-dose L.kefirnofaciens ZW3 (N=8)<br>CUMS+middle-dose L.kefirnofaciens ZW3 (N=8)<br>CUMS+high-dose L.kefirnofaciens ZW3 (N=8)<br>Control (N=8)                                                                 | 14-20 g      | male | SPT: sucrose preference  <br>FST: immobility time  <br>OF1: vertical movements  , crossings number | After 1 week of acclimatization and 6 weeks of CUMS (the last 2 weeks received drugs treatment)                                             | Fecal samples             | -      | 16S rRNA gene sequencing-<br>Illumina HiSeq platform              | V4    | CUMS-depression and control                                  | LEIS: p < 0.05 and LDA > 2.0                                        |
| Sun Y et al.<br>2020 <sup>[171]</sup>          | C57BL/6 mice         | China  | case-control | 4 mice/cage   | LPS-depression     | LPS (N=12)<br>LPS+Schizandrin (N=12)<br>Control (N=12)                                                                                                                                                                                                       | 20 ± 2 g     | male | FST: immobility time  <br>TST: immobility time                                                     | After 1 week of acclimatization and 2 weeks of vehicle or SCH treatment                                                                     | Fecal samples             | -80 °C | 16S rRNA gene sequencing-<br>Illumina MiSeq platform              | V3-V4 | LPS-depression and control                                   | One-way ANOVA followed by Tukey multiple comparison test : p < 0.05 |
| Suzuki K et al.<br>2021 <sup>[172]</sup>       | C57BL/6 J (B6) mice  | Japan  | case-control | -             | CSDS-depression    | CSDS (N=6)<br>CSDS-Crp4 (N=6)<br>Control (N=6)                                                                                                                                                                                                               | 7-week-old   | male | SIT: social interaction time  , distance traveled                                                  | We sampled at three time points on day 1, 9, and 14 in the first experiment and at two time points on day 0 and 32 in the second experiment | Fecal samples             | -80 °C | 16S rRNA gene sequencing-<br>Illumina MiSeq platform              | V3-V4 | After CSDS-<br>depression and pre-CSDS control               | Pairs student's t test: p < 0.05                                    |
| Szyszkowicz JK et al.<br>2021 <sup>[173]</sup> | C57BL/6 mice         | Canada | case-control | Single        | CSDS-depression    | CSDS-susceptible (N=10)<br>CSDS-resilient (N=8)<br>Control (N=6)                                                                                                                                                                                             | 7-9-week-old | male | SIT: social interaction ratios  , contact time  , Corner zones time                                | After 1 week of acclimatization and 3 weeks of CSDS                                                                                         | Cecum contents            | -80 °C | 16S rRNA gene sequencing-<br>Illumina MiSeq Sequencing            | V3-V4 | CSDS-depression and control                                  | One-way ANOVA followed by Bonferroni correction: p < 0.05           |
| Takahashi E et al.<br>2021a <sup>[174]</sup>   | C57BL/6Jc1 (B6) mice | Japan  | case-control | group         | AIN-93G-depression | AIN-93G young (N=10)<br>CRF-1 young (N=10)<br>AIN-93G old (N=10)<br>CRF-1 old (N=10)                                                                                                                                                                         | 3-week-old   | male | TST: immobility time  <br>FST: immobility time                                                     | After 5 weeks of AIN-93G diet for young and 85 weeks of AIN-93G diet for old mice                                                           | Small intestinal contents | -80 °C | Terminal restriction fragment length polymorphism (T-RFLP) method | -     | AIN-93G-depression and CRF-1 control (in old mice)           | ANOVA followed by the Bonferroni correction post hoc test: p < 0.05 |
| Takahashi E et al.<br>2021b <sup>[175]</sup>   | C57BL/6Jc1 (B6) mice | Japan  | case-control | group         | CRS-depression     | Cohort 1<br>CRS-AIN-93G short (N=10)<br>CRS-CRF-1 short (N=10)<br>Control-AIN-93G short (N=10)<br>Control-CRF-1 short (N=10)<br><br>Cohort 2<br>CRS-AIN-93G long (N=10)<br>CRS-CRF-1 long (N=10)<br>Control-AIN-93G long (N=10)<br>Control-CRF-1 long (N=10) | 3-week-old   | male | Body weight  <br>FST: struggling time  , immobility time  <br>SPT: sucrose preference              | After 3 weeks of CRS and 1 week of AIN-93G diet for cohort 1 or 5 weeks of AIN-93G diet for cohort 2                                        | cecum contents            | -80 °C | Terminal restriction fragment length polymorphism (T-RFLP) method | -     | CRS-AIN-93G long-depression and Control-AIN-93G long control | Unpaired t-test with Welch's correction: p < 0.05                   |

|                                        |                                                              |        |              |             |                          |                                                                                                                                                                 |                     |        |                                                                                                                                                                                                                                     |                                                                                                                                 |                                                                                    |                 |                                                                                                            |                |                                      |                                                                           |
|----------------------------------------|--------------------------------------------------------------|--------|--------------|-------------|--------------------------|-----------------------------------------------------------------------------------------------------------------------------------------------------------------|---------------------|--------|-------------------------------------------------------------------------------------------------------------------------------------------------------------------------------------------------------------------------------------|---------------------------------------------------------------------------------------------------------------------------------|------------------------------------------------------------------------------------|-----------------|------------------------------------------------------------------------------------------------------------|----------------|--------------------------------------|---------------------------------------------------------------------------|
| Teng Y et al. 2021 <sup>[156]</sup>    | Macaca fascicularis monkeys                                  | China  | case-control | Single      | CUMS-depression          | CUMS-depression (N=5)<br>Control (N=5)                                                                                                                          | 1-4 year-old        | male   | Frequency and duration of huddle posture <sup>†</sup><br>Frequency and duration of locomotion <sup>†</sup><br>AAT: attempts for the apple <sup>†</sup><br>HT: anxiety-like behaviors <sup>†</sup>                                   | Fresh feces were collected from mice of each group over 55 days after the model was built                                       | Lumen and mucosa of cecum, ascending colon, transverse colon, and descending colon | ~80 °C          | 16S rRNA gene sequencing-Illumina MiSeq platform                                                           | V3-V4          | CUMS-depression and control          | LEISe: p < 0.05 and LDA > 2.0                                             |
| Tian P et al. 2019 <sup>[177]</sup>    | C57BL/6J mice                                                | China  | case-control | -           | CUMS-depression          | CUMS (N=6)<br>CUMS+Fluoxetine (N=6)<br>CUMS+CCFM687 (N=6)<br>Control (N=6)                                                                                      | 6-week-old          | -      | FST: immobile time <sup>†</sup><br>TST: immobile time <sup>†</sup><br>SDT: latent time <sup>†</sup><br>EMP: open arms time <sup>†</sup><br>LDT: light box time <sup>†</sup>                                                         | After 1 week of acclimatization and 5 weeks of CUMS                                                                             | Fecal samples                                                                      | -               | 16S rRNA gene sequencing-Illumina MiSeq platform                                                           | V3-V4          | CUMS-depression and control          | One-way ANOVA followed by Fisher's LSD multiple comparison test: p < 0.05 |
| Tian P et al. 2019 <sup>[178]</sup>    | C57BL/6J mice                                                | China  | case-control | -           | CUMS-depression          | CUMS (N=6)<br>CUMS+Fluoxetine (N=6)<br>CUMS+Probiotics (N=6)<br>Control (N=6)                                                                                   | 6-week-old          | male   | FST: swimming time <sup>†</sup><br>SPT: sucrose preference <sup>†</sup><br>EPM: open arms time <sup>†</sup><br>OFT: center time <sup>†</sup><br>LDT: light chamber entries <sup>†</sup><br>SDT: latency (s) of jumping <sup>†</sup> | After 5 weeks of CUMS                                                                                                           | Fecal samples                                                                      | -               | 16S rRNA gene sequencing-Illumina MiSeq platform                                                           | V3-V4          | CUMS-depression and control          | LEISe: p < 0.05 and LDA > 2.0                                             |
| Tian P et al. 2020 <sup>[179]</sup>    | C57BL/6J mice                                                | China  | case-control | -           | CUMS-depression          | CUMS (N=10)<br>CUMS+Fluoxetine (N=10)<br>CUMS+CCFM1025 (N=10)<br>Control (N=10)                                                                                 | 6-week-old          | male   | FST: immobility time <sup>†</sup><br>TST: immobility time <sup>†</sup><br>OFT: center time <sup>†</sup><br>SPT: sucrose preference <sup>†</sup><br>EPM: open arms time <sup>†</sup>                                                 | After 1 week of acclimatization and 5 weeks of CUMS (and drugs)                                                                 | Fecal samples                                                                      | -               | 16S rRNA gene sequencing-Illumina MiSeq platform                                                           | V3-V4          | CUMS-depression and control          | LEISe: p < 0.05 and LDA > 3.0                                             |
| Tian P et al. 2021 <sup>[148]</sup>    | mice                                                         | China  | case-control | -           | CRS-depression           | CRS (N=6)<br>CRS+Acetylated starch (N=8)<br>CRS+Propionylated starch (N=8)<br>CRS+Butyrylated starch (N=8)<br>CRS+Isobutyrylated starch (N=8)<br>Control (N=10) | -                   | -      | OFT: active time <sup>†</sup> , open field time <sup>†</sup><br>FST: immobility time <sup>†</sup>                                                                                                                                   | After 1 week of acclimatization and 2 weeks of CRS                                                                              | Fecal samples                                                                      | -               | 16S rRNA gene sequencing-                                                                                  | V3-V4          | CRS-depression and control           | LEISe: p < 0.05 and LDA > 2.0                                             |
| Tian XY et al. 2021 <sup>[141]</sup>   | BALB/c mice                                                  | China  | case-control | Single      | IS-postpartum depression | IS-PPD (N=10)<br>IS-PPD+919 syrup (N=10)<br>Control (N=10)                                                                                                      | 7-week-old          | female | FST: immobility time <sup>†</sup><br>TST: immobility time <sup>†</sup>                                                                                                                                                              | On PND2, PND9, PND16, and PND23, fecal samples were collected from each mouse at 12 a.m. and quickly frozen in liquid nitrogen. | Fecal samples                                                                      | Liquid nitrogen | 16S rRNA gene sequencing-Illumina HiSeq2500 platform<br><br>Metagenomic Sequencing-Illumina HiSeq platform | V3-V4<br><br>- | IS-postpartum depression and control | LEISe: p < 0.05 and LDA > 3.0                                             |
| Tillmann S et al. 2019 <sup>[62]</sup> | Flinders sensitive line rats<br>Flinders resistant line rats | Danish | case-control | pair-housed | FSL-depression           | FSL-saline (N=8)<br>FSL-FMT-FSL (N=8)<br>FSL-FMT-FRL (N=8)<br>FRL-saline (N=8)<br>FRL-FMT-FSL (N=8)<br>FRL-FMT-FRL (N=8)                                        | 10.6 ±1.1 weeks old | male   | Body weight <sup>†</sup><br>OFT: No data<br>FST: No data                                                                                                                                                                            | After 2 weeks of acclimatization and 16 days of fecal suspensions transplantation                                               | Fecal samples                                                                      | ~80 °C          | 16S rRNA gene sequencing-Illumina MiSeq platform                                                           | V4             | FSL-depression and FRL-control       | DESeq2: adjusted p (Benjamini-Hochberg) < 0.05                            |

|                                     |                     |              |              |        |                                               |                                                                                                                                                                                      |             |                 |                                                                                                                                                                 |                                                                                                                                               |                |        |                                                                   |       |                                     |                                                                       |
|-------------------------------------|---------------------|--------------|--------------|--------|-----------------------------------------------|--------------------------------------------------------------------------------------------------------------------------------------------------------------------------------------|-------------|-----------------|-----------------------------------------------------------------------------------------------------------------------------------------------------------------|-----------------------------------------------------------------------------------------------------------------------------------------------|----------------|--------|-------------------------------------------------------------------|-------|-------------------------------------|-----------------------------------------------------------------------|
| Tung TH et al. 2019 <sup>[41]</sup> | Sprague-Dawley rats | China Taiwan | case-control | -      | CMS-depression                                | CMS (N=5)<br>CMS-Imipramine (N=5)<br>CMS-Fish oil (N=5)<br>CMS-Olive oil (N=5)<br>Control (N=5)                                                                                      | 6-week-old  | male            | Body weights;<br>OFT: total distances;<br>SPT: sucrose preference;<br>FST: immobile time†                                                                       | After 2 weeks of acclimatization and 12 weeks of CMS                                                                                          | Fecal samples  | -80 °C | 16S rRNA gene sequencing-Illumina MiSeq system                    | V3-V4 | CMS-depression and control          | LEIS: p < 0.05 and LDA > 2.0                                          |
| Wang L et al. 2020 <sup>[44]</sup>  | Kummung mice        | China        | case-control | Single | CUMS-depression                               | CUMS (N=8)<br>CUMS+low-dose TIV (N=8)<br>CUMS+medium-dose TIV (N=8)<br>CUMS+high-dose TIV (N=8)<br>CUMS+Fluoxetine (N=8)<br>Control (N=8)                                            | 6-week-old  | male            | Body weight;<br>FST: immobility time;<br>SPT: sucrose preference;                                                                                               | After 1 week of acclimatization and 4 weeks CUMS                                                                                              | Fecal samples  | -80 °C | 16S rRNA gene sequencing-Illumina HiSeq platform                  | V4    | CUMS-depression and control         | One-way ANOVA followed by LSD tests: p < 0.05                         |
| Wang L et al. 2021 <sup>[45]</sup>  | Sprague-Dawley rats | China        | case-control | -      | CUMS-depression                               | CUMS (N=10)<br>CUMS+Fluoxetine (N=10)<br>CUMS+low-dose SI (N=10)<br>CUMS+middle-dose SI (N=10)<br>CUMS+high-dose SI (N=10)<br>Control (N=10)                                         | 200-220g    | female and male | Body weight;<br>SPT: sucrose preference;<br>OFT: horizontal and vertical movements score;<br>LDT: dark area time†                                               | After 2 weeks of acclimatization, 10 weeks of CUMS and 8 weeks of drugs                                                                       | Fecal samples  | -      | 16S rRNA gene sequencing-Illumina MiSeq platform                  | V3-V4 | CUMS-depression and control         | LEIS: p < 0.05                                                        |
| Wang P et al. 2021 <sup>[46]</sup>  | C57BL/6J mice       | China        | case-control | -      | Antibiotic-depression                         | Antibiotic (N=9)<br>Antibiotic+Saline (N=9)<br>Antibiotic+Probiotics (N=9)<br>Control (N=9)                                                                                          | 6-week-old  | male            | EPM: total crossing[, open arms time, velocity];<br>OFT: total distance[, center time and distance];<br>TST: immobility time†<br>Splash test: grooming latency; | After 1 week of acclimatization, fecal samples were collected after 3 weeks of ASC antibiotics treatment, and 2 weeks of probiotics treatment | Fecal samples  | -      | qPCR                                                              | -     | Antibiotic-depression and control   | One-way ANOVA followed by Tukey's multiple comparisons test: p < 0.05 |
| Wang Q et al. 2019 <sup>[47]</sup>  | CD-1 mice           | China        | case-control | single | CMS-depression                                | CMS (N=8)<br>CMS+SE (N=8)<br>Control (N=8)                                                                                                                                           | 3-month-old | male            | SPT: sucrose preference;<br>FST: immobility time†<br>MBT: number of marbles buried;<br>LDT: light zone duration;                                                | After 2 weeks of acclimatization and 10 weeks of CMS                                                                                          | Fecal samples  | -      | 16S rRNA gene sequencing-Illumina MiSeq platform                  | V3-V4 | CMS-depression and control          | LEIS: p < 0.05 and LDA > 3.0                                          |
| Wang R et al. 2021 <sup>[48]</sup>  | C57BL/6J mice       | China        | case-control | -      | CRS-depression                                | CRS (N=5)<br>CRS+TFA low-dosage (N=5)<br>CRS+TFA high-dosage (N=5)<br>Control (N=5)                                                                                                  | 6-week-old  | male            | OFT: total distance;<br>FST: immobility time†<br>TST: immobility time†                                                                                          | After 7 days of acclimatization and 30 days of CRS                                                                                            | Cecum contents | -      | 16S rRNA gene sequencing-Illumina MiSeq platform                  | V3-V4 | CRS-depression and control          | One-way ANOVA: p < 0.05                                               |
| Wang S et al. 2020b <sup>[49]</sup> | C57BL/6 mice        | Japan        | case-control | Single | FMT CSDS-depression<br><br>Microbe-depression | ABX FMT CSDS-susceptible (N=7)<br>Water FMT CSDS-susceptible (N=7)<br>ABX FMT control (N=7)<br>Water FMT control (N=7)<br><br>ABX-Microbe (N=10)<br>ABX+Water (N=10)<br>Water (N=10) | 8-week-old  | male            | SPT: sucrose preference;<br>FST: immobility time†<br>TST: immobile time†                                                                                        | After 14 days of antibiotic cocktail treatment and 14 days of FMT from CSDS-susceptible mice or control                                       | Fecal samples  | -      | 16S rRNA gene sequencing-MiSeq according to the Illumina protocol | V1-V2 | FMT CSDS-depression and FMT control | Two-way ANOVA followed by post hoc Fisher's LSD test: p < 0.05        |
| Wang S et al. 2020b <sup>[50]</sup> | C57BL/6 mice        | Japan        | case-control | -      | CSDS-depression                               | CSDS (N=10)<br>CSDS+Antibiotics (N=10)                                                                                                                                               | 8-week-old  | male            | SPT: sucrose preference;                                                                                                                                        | Fresh fecal samples were collected on day 15 before CSDS                                                                                      | Fecal samples  | -80-C  | 16S rRNA gene sequencing-Illumina MiSeq platform                  | V1-V2 | CSDS-depression and control         | Two-way ANOVA followed by post hoc Tukey test: p < 0.05               |

|                                         |               |              |              |             |                                           |                                                                                                                                                                                                |               |        |                                                                                                                                                        |                                                                                                                                                   |                 |        |                                                                                                            |       |                                                                      |                                                                           |
|-----------------------------------------|---------------|--------------|--------------|-------------|-------------------------------------------|------------------------------------------------------------------------------------------------------------------------------------------------------------------------------------------------|---------------|--------|--------------------------------------------------------------------------------------------------------------------------------------------------------|---------------------------------------------------------------------------------------------------------------------------------------------------|-----------------|--------|------------------------------------------------------------------------------------------------------------|-------|----------------------------------------------------------------------|---------------------------------------------------------------------------|
|                                         |               |              |              |             |                                           | Control (N=10)<br>Control+Antibiotics (N=10)                                                                                                                                                   |               |        |                                                                                                                                                        | and 24 hours after CSDS (day15-24)                                                                                                                |                 |        |                                                                                                            |       |                                                                      |                                                                           |
| Wang S et al. 2021 <sup>[151]</sup>     | C57BL/6 mice  | Japan        | case-control | Single      | FMT CSDS-depression                       | ABX FMT CSDS-susceptible Eplax2 KO (N=10)<br>ABX FMT CSDS-susceptible WT (N=10)<br>ABX FMT control Eplax2 KO (N=10)<br>ABX FMT control WT (N=10)                                               | 8-week-old    | male   | SPT: sucrose preference ↓                                                                                                                              | After 14 days for antibiotic cocktail treatment and 14 days for FMT procedure                                                                     | Fecal samples   | -80 °C | 16S rRNA gene sequencing-Illumina MiSeq platform                                                           | V1-V2 | FMT CSDS-depression and control (in both Eplax2 KO mice and WT mice) | Kruskal-Wallis test: p < 0.05                                             |
| Wang Y et al. 2021 <sup>[152]</sup>     | C57BL/6 mice  | China        | case-control | 4 mice/cage | LPS-depression                            | LPS (N=20)<br>LPS+(S)-norketamine (N=15)<br>LPS+(R)-norketamine (N=15)<br>Control (N=8)                                                                                                        | 2-month-old   | male   | FST: immobility time ↑<br>TST: immobility time ↑                                                                                                       | After 1 week of acclimatization and a single injection of LPS                                                                                     | Fecal samples   | -80 °C | 16S rRNA gene sequencing-Illumina MiSeq platform                                                           | V3-V5 | LPS-depression and control                                           | Kruskal-Wallis test: p < 0.05                                             |
| Ward AK et al. 2019 <sup>[153]</sup>    | C57BL/6 mice  | Ireland      | case-control | 4 mice/cage | ADR-159-depression                        | ADR-159 (N=12)<br>Control (N=12)                                                                                                                                                               | 8-week-old    | male   | OFT: center time ↓, total distance ↓<br>3CT: interaction time ↓, chamber time ↑<br>TST: immobility time ↑                                              | After 1 week of acclimatization, faecal samples were collected weekly during the 8 weeks of designated diet                                       | Fecal samples   | -80 °C | 16S rRNA gene sequencing-MiSeq sequencing (Germany)                                                        | V3-V4 | ADR-159-depression and control                                       | DESeq2 with Wald test: p < 0.05                                           |
| Wei CL et al. 2019 <sup>[154]</sup>     | C57BL/6J mice | China-Taiwan | case-control | 4 mice/cage | Corticosterone-depression                 | Corticosterone (N=8)<br>Corticosterone+Fluoxetine (N=8)<br>Corticosterone+Live L. paracasei PS23 (N=8)<br>Corticosterone+Heat-killed L. paracasei PS23 (N=8)<br>Control (N=8)                  | 6-8 weeks old | male   | OFT: total distance ↓, center time and entries ↓<br>SPT: sugar preference ↓<br>FST: immobility time ↑                                                  | Three or four fecal pellets were collected on day 38                                                                                              | Fecal samples   | -20 °C | qPCR for Bifidobacterium, Clostridium coccoides group, Enterobacteriaceae, Enterococcus, and Lactobacillus | -     | Corticosterone-depression and control                                | One-way ANOVA followed by Newman-Keuls multiple comparison test: p < 0.05 |
| Wei LN et al. 2019 <sup>[155]</sup>     | Wistar rats   | China        | case-control | Single      | CUMS-depression                           | CUMS (N=9)<br>Control (N=9)                                                                                                                                                                    | 180-210 g     | male   | SPT: sucrose preference ↓<br>FST: swimming time ↓, immobility time ↓                                                                                   | After 1 week of acclimatization and 5 weeks of CUMS                                                                                               | Rectal contents | -80 °C | 16S rRNA gene sequencing-Illumina HiSeq2500 platform                                                       | V4    | CUMS-depression and control                                          | LEISc: p < 0.05 and LDA > 4.0                                             |
| Westfall S et al. 2021 <sup>[156]</sup> | C57BL/6J mice | USA          | case-control | group       | CUMS-depression<br><br>CUMS+US-depression | Stress (N=16)<br>Stress+BDPP (N=16)<br>Stress+Probiotics (N=16)<br>Stress+Synbiotics (N=16)<br>Control (N=16)<br>Control+BDPP (N=16)<br>Control+Probiotics (N=16)<br>Control+Synbiotics (N=16) | 8-week-old    | male   | FST: freezing time ↑<br>OFT: center time ↓                                                                                                             | After 2 week of acclimatization and 11 weeks of respective treatment (fecal pellets were collected after 4 weeks of CUMS and after 7 days of US ) | Fecal samples   | -80 °C | 16S rRNA gene sequencing-Illumina MiSeq platform                                                           | V4    | CUMS-depression and control<br><br>CUMS+US-depression and control    | One-way ANOVA and Tukey's post-hoc analysis: p < 0.05                     |
| Wong ML et al. 2016 <sup>[157]</sup>    | C57BL/6J mice | Australia    | case-control | group       | CRS-depression                            | CRS (N=15)<br>CRS+Minocycline (N=15)<br>Minocycline (N=12)<br>Control (N=12)                                                                                                                   | 60-90 days    | male   | Body weight ↓<br>FST: floating time ↑, swimming and climbing behaviors ↓<br>EPM: open arms time ↓, open/close arms time ↓<br>OFT: defecations number ↑ | After 21 days of CRS                                                                                                                              | Fecal samples   | -80 °C | 16S rRNA gene sequencing-Illumina MiSeq platform                                                           | V4    | CRS-depression and control                                           | Mann-Whitney U-test: p < 0.05                                             |
| Wu F et al. 2020 <sup>[158]</sup>       | C57BL/6 mice  | China        | case-control | -           | HFD-depression                            | HFD (N=10)<br>HFD+A. muciniphila (N=10)<br>Control (N=10)<br>Control+A. muciniphila (N=10)                                                                                                     | 8-week-old    | female | SPT: sugar preference ↓<br>YMT: the error times ↑                                                                                                      | After 2 week of acclimatization and 10 months of high-fat diet plus A. muciniphilus gavage                                                        | Fecal samples   | -      | 16S rDNA gene sequencing-Illumina MiSeq platform                                                           | V4    | HFD-depression and control                                           | One-way ANOVA: p < 0.05                                                   |



|                                     |                             |       |              |             |                                             |                                                                                                                         |                 |        |                                                                                                                                                                                                                                                        |                                                                                                                        |                                                |        |                                                          |       |                                                                     |                                                                                                    |
|-------------------------------------|-----------------------------|-------|--------------|-------------|---------------------------------------------|-------------------------------------------------------------------------------------------------------------------------|-----------------|--------|--------------------------------------------------------------------------------------------------------------------------------------------------------------------------------------------------------------------------------------------------------|------------------------------------------------------------------------------------------------------------------------|------------------------------------------------|--------|----------------------------------------------------------|-------|---------------------------------------------------------------------|----------------------------------------------------------------------------------------------------|
| Wu J et al. 2021 <sup>[159]</sup>   | C57BL/6 mice                | China | case-control | Single      | CUMS-depression<br>Dexamethasone-depression | CUMS (N=15)<br>Dexamethasone (N=15)<br>Control (N=15)                                                                   | 4 to 6-week-old | female | OFF: total distance <sub>1</sub> , speed <sub>1</sub> , crossing and rearing number <sub>1</sub><br>EPM: open arms time <sub>1</sub><br>FST: immobility time <sub>1</sub><br>TST: immobility time <sub>1</sub><br>SPT: sucrose preference <sub>1</sub> | After 1 week of acclimatization, the fecal samples were collected after 35 days of CUMS or dexamethasone treatment     | Fecal samples                                  | -80 °C | 16S rRNA sequencing analysis-<br>Illumina MiSeq platform | V3-V4 | CUMS-depression and control<br>Dexamethasone-depression and control | LEIS: p < 0.05 and LDA > 3.0<br>Kruskal-Wallis tests with multiple comparison correction: p < 0.05 |
| Wu J et al. 2022 <sup>[160]</sup>   | Macaca fascicularis monkeys | China | case-control | group       | Naturally-occurring depression              | Depression (N=6)<br>Control (N=6)                                                                                       | Adult           | female | Duration of huddle and sit alone behaviors <sub>1</sub><br>Duration of amicable and locomotion activities <sub>1</sub>                                                                                                                                 | After behavioral tests                                                                                                 | Cecum contents                                 | -80 °C | Metagenomic-Illumina HiSeq X platform                    | -     | Naturally-occurring depression and control                          | LEIS: p < 0.05 and LDA > 2.0                                                                       |
| Wu M et al. 2020 <sup>[161]</sup>   | C57BL/6 mice                | China | case-control | Single      | CRS-depression                              | CRS (N=20)<br>Control (N=20)                                                                                            | 8-16 week-old   | male   | OFF: center time <sub>1</sub> , center distance <sub>1</sub><br>FST: immobility time <sub>1</sub><br>SPT: sucrose preference <sub>1</sub><br>Body weight <sub>1</sub>                                                                                  | After 4 weeks of CRS                                                                                                   | Fecal samples                                  | -80 °C | 16S rRNA gene sequencing-<br>Roche 454 sequencing        | V3-V5 | CRS-depression and control                                          | LEIS: p < 0.05 and LDA > 3.0                                                                       |
| Xiu J et al. 2021 <sup>[162]</sup>  | C57BL/6 mice                | China | case-control | Single      | LPS-depression                              | LPS (N=6)<br>CAP (N=6)<br>LPS+CAP (N=6)<br>Control (N=6)                                                                | 4-week-old      | male   | SPT: sucrose preference <sub>1</sub><br>OFF: rearing and crossing number <sub>1</sub><br>FST: immobility time <sub>1</sub><br>TST: immobility time <sub>1</sub>                                                                                        | After 4 months of CAP treatment. During the last 5 days, mice in LPS and CAP+LPS groups received lipopolysaccharide    | Fecal samples                                  | -80 °C | 16S rRNA gene sequencing-<br>Illumina MiSeq platform     | V3-V4 | LPS-depression and control                                          | LEIS: p < 0.05 and LDA > 3.0                                                                       |
| Xiao Q et al. 2020 <sup>[163]</sup> | C57BL/6 mice                | China | case-control | Single      | CRS-depression                              | CRS (N=10)<br>CRS+Crocin-1 (N=10)<br>Control (N=10)                                                                     | 6-week-old      | male   | SPT: sucrose preference <sub>1</sub><br>FST: immobility time <sub>1</sub><br>TST: immobility time <sub>1</sub>                                                                                                                                         | After 1 week of acclimatization and 10 weeks of CRS (the last 6 weeks received crocin-1 and duration of CRS is halved) | Cecal contents                                 | -80 °C | 16S rRNA gene sequencing-<br>Illumina MiSeq platform     | V3-V4 | CRS-depression and control                                          | LEIS: p < 0.05 and LDA > 2.0                                                                       |
| Xie R et al. 2020a <sup>[164]</sup> | C57BL/6 mice                | China | case-control | Single      | CSDS-depression                             | CSDS-susceptible (N=7)<br>CSDS-resistant (N=7)<br>Control (N=7)                                                         | 7-week-old      | male   | SIT: interaction ratio <sub>1</sub> , interaction time <sub>1</sub><br>SPT: sucrose preference <sub>1</sub><br>OFF: total distance <sub>1</sub> , center time <sub>1</sub> , center entries <sub>1</sub>                                               | After 1 week of acclimatization and 10 days of CSDS                                                                    | Peyer's patches-gut-associated lymphoid tissue | -      | 16S rRNA gene sequencing-<br>Illumina MiSeq platform     | V3-V4 | CSDS-depression susceptible and control                             | One-way ANOVA: p < 0.05                                                                            |
| Xie R et al. 2020b <sup>[165]</sup> | C57BL/6 mice                | China | case-control | 4 mice/cage | CSDS-depression                             | CSDS-susceptible (N=10)<br>CSDS-susceptible+L. reuteri 3 (N=10)<br>Control (N=10)<br>Control+L. reuteri 3 (N=10)        | 8-week-old      | male   | SIT: interaction ratio <sub>1</sub><br>SPT: sucrose preference <sub>1</sub><br>TST: immobility time <sub>1</sub><br>OFF: center time and entries <sub>1</sub> , total distance <sub>1</sub>                                                            | After 1 week of acclimatization, 10 days of CSDS and 4 weeks of microbial treatment                                    | Colonic contents                               | -80 °C | 16S rRNA gene sequencing-<br>Illumina MiSeq sequencing   | V3-V4 | CSDS-depression and control                                         | One-way ANOVA test followed by Tukey's test: p < 0.05                                              |
| Xie Y et al. 2021 <sup>[166]</sup>  | C57BL/6 mice                | China | case-control | Single      | SIMT-anti-depression                        | Small intestinal microbiota transplantation (N=6)<br>Large intestinal microbiota transplantation (N=6)<br>Control (N=6) | PND56           | male   | SPT: sucrose preference <sub>1</sub><br>FST: immobility time <sub>1</sub><br>TST: immobility time <sub>1</sub>                                                                                                                                         | Before microbiota transplantation (PND7) and after 14 days of microbiota transplantation (PND92)                       | Fecal samples                                  | -80 °C | 16S rRNA gene sequencing-<br>Illumina MiSeq platform     | V3-V4 | SIMT-anti-depression and control                                    | Kruskal-Wallis H test followed by the Bonferroni post hoc test: p < 0.05                           |
| Xu J et al. 2022 <sup>[167]</sup>   | C57BL/6 mice                | China | case-control | Single      | CUMS-depression                             | CUMS (N=12)<br>CUMS+high-dose L. rhamnosus zz-1 (N=12)<br>CUMS+middle-dose L. rhamnosus zz-1                            | 4-week-old      | male   | Body weight <sub>1</sub><br>SPT: sugar preference <sub>1</sub><br>FST: immobility time <sub>1</sub><br>OFF: total distance <sub>1</sub> , center time <sub>1</sub>                                                                                     | After 1 week of acclimatization and 5 weeks of CUMS                                                                    | Cecal contents                                 | -80 °C | 16S rRNA gene sequencing-<br>Illumina MiSeq platform     | V3-V4 | CUMS-depression and control                                         | one-way analyses of variance (ANOVAs) followed by Tukey's post hoc test: p < 0.05<br>LEIS          |

|                                      |               |       |              |             |                    |                                                                                                                                                                                                                                         |            |      |                                                                                                                                                                    |                                                                                                               |                |        |                                                                                            |       |                                         |                                                                                                     |
|--------------------------------------|---------------|-------|--------------|-------------|--------------------|-----------------------------------------------------------------------------------------------------------------------------------------------------------------------------------------------------------------------------------------|------------|------|--------------------------------------------------------------------------------------------------------------------------------------------------------------------|---------------------------------------------------------------------------------------------------------------|----------------|--------|--------------------------------------------------------------------------------------------|-------|-----------------------------------------|-----------------------------------------------------------------------------------------------------|
|                                      |               |       |              |             |                    | (N=12)<br>CUMS+low-dose <i>L. rhamnosus</i> zz-1<br>(N=12)<br>Control (N=12)                                                                                                                                                            |            |      |                                                                                                                                                                    |                                                                                                               |                |        |                                                                                            |       |                                         |                                                                                                     |
| Xu M et al. 2022 <sup>[166]</sup>    | C57BL/6J mice | China | case-control | -           | CUS-depression     | CUS (N=9)<br>CUMS+ <i>Lactobacillus</i> for each strain (N=7)<br>Control (N=8)                                                                                                                                                          | 6 weeks    | male | OF1: center time;<br>MBT: number of buried beads;<br>LDT: open chamber time;<br>FST: immobility time;<br>TST: immobility time                                      | After 1 week of acclimatization and 6 weeks of CUS                                                            | Colon contents | -      | 16S rRNA gene sequencing-<br>Illumina MiSeq platform                                       | V3-V4 | CUS-depression and control              | -                                                                                                   |
| Xu Z et al. 2019 <sup>[166]</sup>    | C57BL/6 mice  | China | case-control | 4 mice/cage | CAE-depression     | CAE (N=6)<br>Control (N=6)                                                                                                                                                                                                              | 4-week-old | male | OF1: center time and distance;<br>EPM: open arms time;<br>FST: mobility time;<br>TST: immobility time                                                              | After 1 week of acclimatization and fecal samples were collected at the twentieth day of the drinking session | Fecal samples  | -80 °C | 16S rRNA metagenomic sequencing-<br>16S metagenomic sequencing library protocol (Illumina) | V3-V5 | CAE-depression and control              | Unpaired Student's t-test; p < 0.05                                                                 |
| Xue M et al. 2021 <sup>[170]</sup>   | C57BL/6J mice | China | case-control | Single      | Alcohol-depression | Alcohol (N=8)<br>Alcohol+Facoidan (N=8)<br>Control (N=8)                                                                                                                                                                                | 8-week-old | male | Body weight;<br>Food intake;<br>SPT: sucrose preference;<br>FST: immobility time;<br>Y-maze test: novel arms time;<br>OF1: total distance, center time and entries | After 3 weeks of acclimatization and 10 weeks of alcohol exposure (and facoidan treatment)                    | Colon contents | -      | 16S rRNA gene sequencing-<br>Illumina HiSeq platform                                       | V3-V4 | Alcohol-depression and control          | One-way ANOVA followed by Tukey's test or Kruskal-Wallis test followed by Bonferroni test; p < 0.05 |
| Yan T et al. 2020 <sup>[171]</sup>   | C57BL/6 mice  | China | case-control | 4 mice/cage | CUMS-depression    | CUMS (N=10)<br>CUMS+Polysaccharide (N=10)<br>Control (N=10)<br>CUMS-donor (N=10)<br>CUMS+Polysaccharide-donor (N=10)<br>Control-donor (N=10)<br><br>ABX FMT-CUMS (N=10)<br>ABX FMT-CUMS+Polysaccharide (N=10)<br>ABX FMT-Control (N=10) | 18-22 g    | male | OF1: center distance;<br>EPM: open arms time and entries;<br>TST: immobility time;<br>FST: immobility time                                                         | After 1 week of acclimatization and 4 weeks of CUMS                                                           | Cecum contents | -80 °C | 16S rRNA gene sequencing-<br>Illumina MiSeq platform                                       | V3-V4 | CUMS-depression and control             | One-way ANOVA followed by Tukey multiple comparison tests; p < 0.05                                 |
| Yan T et al. 2021 <sup>[172]</sup>   | C57BL/6 mice  | China | case-control | 4 mice/cage | LPS-depression     | LPS (N=10)<br>LPS+SCE (N=10)<br>LPS+SCL (N=10)<br>LPS+SCPS (N=10)<br>LPS+SCVO (N=10)<br>Control (N=10)                                                                                                                                  | 18-22 g    | male | FST: immobility time;<br>TST: immobility time                                                                                                                      | After 7 days of acclimatization and 14 days of drugs                                                          | Fecal samples  | -      | 16S rRNA gene pyrosequencing-<br>Illumina MiSeq platform                                   | V3-V4 | LPS-depression and control              | One-way ANOVA followed by Tukey multiple comparison tests; p < 0.05                                 |
| Yang C et al. 2017a <sup>[173]</sup> | C57BL/6 mice  | Japan | case-control | Single      | CSDS-depression    | CSDS-susceptible (N=8)<br>CSDS-resistant (N=6)<br>Control (N=8)                                                                                                                                                                         | 8-week-old | male | SIT: interaction time                                                                                                                                              | After 10 days of CSDS                                                                                         | Fecal samples  | -80 °C | 16S rRNA analysis-Terminal restriction fragment length polymorphism (T-RFLP) analysis      | -     | CSDS-depression susceptible and control | Fisher's exact test; p < 0.05                                                                       |

|                                     |                                         |       |              |             |                                                      |                                                                                                                                                                                             |                  |        |                                                                                                                                                    |                                                                                                                                                                                       |                |        |                                                                                                                 |       |                                                                                                      |                                                                        |
|-------------------------------------|-----------------------------------------|-------|--------------|-------------|------------------------------------------------------|---------------------------------------------------------------------------------------------------------------------------------------------------------------------------------------------|------------------|--------|----------------------------------------------------------------------------------------------------------------------------------------------------|---------------------------------------------------------------------------------------------------------------------------------------------------------------------------------------|----------------|--------|-----------------------------------------------------------------------------------------------------------------|-------|------------------------------------------------------------------------------------------------------|------------------------------------------------------------------------|
| Yang C et al. 2017 <sup>9174</sup>  | C57BL/6 mice                            | Japan | case-control | Single      | CSDS-depression                                      | CSDS (N=6)<br>CSDS+(R)-ketamine (N=6)<br>CSDS+(S)-ketamine (N=6)<br>Control (N=6)                                                                                                           | 8-week-old       | male   | FST: immobility↓<br>TST: immobility↑<br>SPT: sucrose preference↓                                                                                   | The fecal samples were collected 10 days of CSDS and 4 days (day 16) after a single dose of drugs                                                                                     | Fecal samples  | -80 °C | 16S rRNA sequencing analysis-Illumina MiSeq platform                                                            | V4    | CSDS-depression and control                                                                          | One-way ANOVA: p < 0.05                                                |
| Yang C et al. 2019 <sup>1775</sup>  | Sprague-Dawley rats<br><br>C57BL/6 mice | China | case-control | -           | SNI-depression<br><br>FMT SNI susceptible-depression | SNI anhedonia susceptible (N=8)<br>SNI anhedonia resilient (N=8)<br>Control (N=8)<br><br>ABX FMT-SNI susceptible (N=10)<br>ABX FMT-SNI resilient (N=10)<br>ABX PBS (N=10)<br>Control (N=10) | 2-month-old      | male   | Body weight↓<br>MWt: withdraw threshold↓<br>SPT: sucrose preference↓<br>TFT: tail flick latency↓<br>FST: immobility time↑<br>TST: immobility time↑ | After 7 days of acclimation, then 23 days after spared nerve injury (day 0)<br><br>After 7 days of acclimation, 14 days of antibiotics treatment and 14 days of feces transplantation | Fecal samples  | -80 °C | 16S rRNA gene sequencing-Illumina MiSeq system                                                                  | V3-V4 | SNI-depression susceptible and control<br><br>ABX FMT SNI susceptible-depression and ABX PBS-control | One-way ANOVA followed by post-hoc Tukey's test: p < 0.05              |
| Yang HL et al. 2021 <sup>1776</sup> | C57BL/6J mice                           | China | case-control | -           | CRS-depression                                       | CRS (N=15)<br>CRS+Dexamethasone (N=15)<br>Control (N=15)<br>Control+Dexamethasone (N=15)                                                                                                    | 7-week-old       | male   | SPT: sucrose preference↓<br>FST: immobility time↑<br>OFT: center time↓<br>EPM: closed arms time↑                                                   | After 1 week of acclimatization and 5 weeks of CRS along with dexamethasone                                                                                                           | Fecal samples  | -      | 16S rRNA gene sequencing-Illumina MiSeq platform                                                                | V3-V4 | CRS-depression and control                                                                           | One-way ANOVA followed by Dunnett's multiple comparison test: p < 0.05 |
| Yang J et al. 2021 <sup>1777</sup>  | Sprague-Dawley rats                     | China | case-control | -           | PSD-depression                                       | PSD (N=15)<br>PSD+Exercise Training (N=15)<br>Control (n=15)                                                                                                                                | 230-250 g        | male   | -                                                                                                                                                  | After 7 days of acclimatization and 30 consecutive days of UCS                                                                                                                        | -              | -      | -                                                                                                               | -     | PSD-depression and control                                                                           | LEIS: p < 0.05 and LDA > 3.0                                           |
| Yang Q et al. 2020 <sup>1778</sup>  | C57BL/6 mice                            | China | case-control | 5 mice/cage | CUMS-depression                                      | CUMS (N=8)<br>CUMS+Imipramine (N=8)<br>CUMS+chronic minocycline (N=8)<br>CUMS+acute minocycline (N=8)<br>Control (N=8)                                                                      | 6-8 week-old     | male   | OFT: total distance↓, center time↓<br>TST: immobility time↑<br>FST: immobility time↑                                                               | After 1 week of acclimatization and 6 weeks of CUMS (the last 4 weeks received drugs treatment)                                                                                       | Fecal samples  | -80 °C | 16S rRNA gene sequencing-Illumina MiSeq platform                                                                | V4-V5 | CUMS-depression and control                                                                          | LEIS: p < 0.05 and LDA > 2.0                                           |
| Yang Y et al. 2022 <sup>1779</sup>  | Sprague-Dawley rats                     | China | case-control | -           | MS-postpartum depression                             | MS (N=8)<br>MS+Lactobacillus casei (N=8)<br>MS+Paroxetine (N=8)<br>Control (N=8)                                                                                                            | Postpartum PND28 | female | SPT: sugar preference↓<br>EPM: open arms time and entries↓<br>FST: immobility time↑<br>TST: immobility time↑                                       | PND 28 (PND2-PND21 for MS)                                                                                                                                                            | Cecal contents | -      | qPCR for <i>Enterococcus faecalis</i> , <i>Bifidobacterium</i> , <i>Lactobacillus</i> , <i>Escherichia coli</i> | -     | MS-postpartum depression and control                                                                 | ANOVA: p < 0.05                                                        |
| Yu JB et al. 2019 <sup>1780</sup>   | Sprague-Dawley rats                     | China | case-control | -           | CUS-depression                                       | CUS (N=8)<br>CUS+Fluoxetine (N=8)<br>CUS+Paclitaxel low-dosage (N=8)<br>CUS+Paclitaxel high-dosage (N=8)<br>Control (N=8)                                                                   | 180-200 g        | male   | SPT: sucrose preference↓                                                                                                                           | After 8 weeks of CUMS (the last 2 weeks received drugs treatment)                                                                                                                     | Fecal samples  | -      | 16S rRNA gene sequencing-Barcoded pyro sequencing                                                               | V3-V4 | CUMS-depression and control                                                                          | Student's t-test: p < 0.05                                             |
| Yu M et al. 2017 <sup>1781</sup>    | Wistar rats                             | China | case-control | -           | CVS-depression                                       | CVS (N=8)<br>Control (N=8)                                                                                                                                                                  | 8-week-old       | male   | Body weight↓<br>OFT: rearing and crossing numbers↓<br>SPT: sucrose preference↓                                                                     | After 4 weeks of CVS                                                                                                                                                                  | Fecal samples  | -80 °C | 16S rRNA gene sequencing-Illumina HiSeq platform                                                                | V3-V4 | CVS-depression and control                                                                           | Student's t-test: p < 0.05                                             |
| Yu M et al. 2020 <sup>1782</sup>    | Wistar rats                             | China | case-control | -           | CVS-depression                                       | CVS (N=8)<br>CVS+Antibiotic (N=8)<br>CVS+CSGS (N=8)<br>CVS+Antibiotic+CSGS (N=8)<br>Control (N=8)                                                                                           | 200 ± 20 g       | male   | Body weight↓<br>SPT: sucrose preference↓<br>OFT: rearing number↓, crossing number↓                                                                 | After 28 days of CVS experiment                                                                                                                                                       | Fecal samples  | -80 °C | 16S rRNA gene sequencing-Illumina MiSeq platform                                                                | V3-V4 | CVS-depression and control                                                                           | One-way ANOVA: p < 0.05                                                |

|                                       |                     |       |              |             |                 |                                                                                                                                                       |               |      |                                                                                                                     |                                                                                                                                   |                |        |                                                                      |       |                                                       |                                                                                               |
|---------------------------------------|---------------------|-------|--------------|-------------|-----------------|-------------------------------------------------------------------------------------------------------------------------------------------------------|---------------|------|---------------------------------------------------------------------------------------------------------------------|-----------------------------------------------------------------------------------------------------------------------------------|----------------|--------|----------------------------------------------------------------------|-------|-------------------------------------------------------|-----------------------------------------------------------------------------------------------|
| Yu M et al. 2021 <sup>[103]</sup>     | Wistar rats         | China | case-control | -           | CVS-depression  | CVS (N=8)<br>Antibiotic (N=8)<br>CVS+Antibiotic (N=8)<br>Control (N=8)                                                                                | 200 ± 20 g    | male | OFF: number of rearing and crossing ↓<br>SPT: sucrose preference ↓                                                  | After 4 weeks of CVS                                                                                                              | Fecal samples  | -80 °C | 16S rRNA gene sequencing-Illumina HiSeq platform                     | V3-V4 | CVS-depression and control                            | One-way ANOVA: p < 0.05                                                                       |
| Yun SW et al. 2020 <sup>[104]</sup>   | C57BL/6J mice       | Korea | case-control | -           | EC-depression   | EC (N=6)<br>EC+L. gasseri NK109 (N=6)<br>Control (N=6)                                                                                                | 5-week-old    | male | TST: immobility time ↑<br>FST: immobility time ↑                                                                    | After 1 week of acclimatization and 5 days of Escherichia coli K1 treatment and 5 days of Lactobacillus gasseri NK109 treatment   | Fecal samples  | -80°C  | 16S rRNA gene sequencing-Illumina iSeq 100 platform                  | V4    | EC-depression and control                             | Unpaired t-test: p < 0.05                                                                     |
| Yun SW et al. 2021 <sup>[105]</sup>   | C57BL/6J mice       | Korea | case-control | 3 mice/cage | EC-depression   | EC (N=6)<br>EC+L. paracasei NK112 (N=6)<br>Control (N=6)                                                                                              | 5-week-old    | male | EPM: open arms time and entries ↓<br>TST: immobility time ↑<br>FST: immobility time ↑                               | After 1 week of acclimatization and 5 days of Escherichia coli K1 treatment and 5 days of Lactobacillus paracasei NK112 treatment | Fecal samples  | -80°C  | 16S rRNA gene sequencing-Illumina iSeq 100 platform                  | V4    | EC-depression and control                             | one-way ANOVA with Tukey's multiple comparison test: p < 0.05<br>LEIS: p < 0.05 and LDA > 4.0 |
| Zhang F et al. 2020 <sup>[106]</sup>  | Sprague-Dawley rats | China | case-control | 5 rats/cage | 5-Fu-depression | 5-Fu treatment (N=10)<br>Control (N=10)                                                                                                               | 5-week-old    | male | Body weight and food intake ↓<br>TST: sedentary time ↑<br>SPT: sugar preference rate ↓                              | After 1 week of adaption and 4 days of 5-Fu treatment                                                                             | Fecal samples  | -80 °C | 16S rRNA gene sequencing-Illumina NovaSeq platform                   | V3-V4 | 5-Fu-depression and control                           | Wilcoxon's rank-sum test: p < 0.05                                                            |
| Zhang J et al. 2020 <sup>[107]</sup>  | C57BL/6 mice        | Japan | case-control | -           | LPS-depression  | LPS (N=10)<br>LPS+SDV (N=10)<br>SDV (N=10)<br>Control (N=10)                                                                                          | 8-week-old    | male | FST: immobility time ↑                                                                                              | After 14 days of recovery and LPS intraperitoneally (i.p.) injected                                                               | Fecal samples  | -80 °C | 16S rRNA gene sequencing-MiSeq according to the Illumina protocol    | V1-V2 | LPS-depression and control                            | Two-way ANOVA followed by post-hoc Tukey's multiple comparison tests: p < 0.05                |
| Zhang JC et al. 2017 <sup>[108]</sup> | C57BL/6 mice        | Japan | case-control | Single      | CSDS-depression | CSDS (N=5)<br>CSDS+MR16-1 (N=5)<br>Control (N=5)                                                                                                      | 8-week-old    | male | SIT: No data<br>SPT: sucrose preference ↓<br>FST: immobility time ↑<br>TST: immobility time ↑                       | After 10 days of CSDS                                                                                                             | Fecal samples  | -80 °C | 16S rRNA gene sequencing-Illumina MiSeq platform                     | V4    | CSDS-depression and control                           | One-way ANOVA followed by the post hoc LSD test: p < 0.05                                     |
| Zhang K et al. 2019 <sup>[109]</sup>  | Sprague-Dawley rats | Japan | case-control | -           | LH-depression   | LH (N=6)<br>non-LH (N=7)<br>Control (N=7)                                                                                                             | 7-week-old    | male | Post-shock test: numbers of escape failures ↑                                                                       | Fresh fecal samples were collected in a blind manner before post-shock stress on day 4                                            | Fecal samples  | -80°C  | 16S rRNA gene sequencing-Illumina MiSeq platform                     | V3-V4 | LH-depression and control                             | One-way analysis of variance, followed by post hoc Fisher's LSD test: p < 0.05                |
| Zhang L et al. 2021 <sup>[110]</sup>  | Kunming mice        | China | case-control | Single      | CUMS-depression | CUMS (N=12)<br>CUMS+Fluoxetine (N=12)<br>CUMS+TIV low-dosage (N=12)<br>CUMS+TIV middle-dosage (N=12)<br>CUMS+TIV high-dosage (N=12)<br>Control (N=12) | Adult 16-20 g | male | Body weight ↓<br>TST: immobility time ↑<br>SPT: sucrose preference ↓                                                | After 1 week of acclimatization and 4 weeks of CUMS (the last 2 weeks received drugs treatment)                                   | Colon contents | -20°C  | 16S rRNA gene sequencing-Rhoinia's MiSeq platform                    | V4    | CUMS-depression and control                           | One-way ANOVA: p < 0.05                                                                       |
| Zhang M et al. 2021 <sup>[111]</sup>  | ICR mice            | China | case-control | Single      | CUMS-depression | CUMS (N=10)<br>CUMS+Imipramine (N=10)<br>CUMS+Alkaloids (N=10)<br>Control (N=10)                                                                      | 20-25 g       | male | SPT: sucrose preference ↓<br>FST: immobility time ↑<br>OFF: crossings and rearings number ↓, modifications number ↓ | After 1 week of acclimatization and 7 weeks of CUMS (the last 4 weeks received drugs treatment)                                   | Cecum contents | -20°C  | 16S rRNA gene sequencing-Illumina NovaSeq platform                   | V3-V4 | Depression-like behaviors correlate with gut microbes | LEIS: p < 0.05 and LDA > 2.0<br>Spearman correlation test: p < 0.05                           |
| Zhang W et al. 2021 <sup>[112]</sup>  | Sprague-Dawley rats | China | case-control | Single      | CUMS-depression | At weeks 9:<br>CUMS (N=36)<br>Control (N=12)                                                                                                          | 180-220 g     | male | Body weight ↓<br>SPT: sucrose preference ↓<br>OFF: rearing and crossing numbers ↓<br>LDT: dark time ↑               | After 1 week of acclimatization, 8 weeks of CUMS and 6 weeks of treatment period. Fecal samples were collected at weeks 9 and 15. | Fecal samples  | -      | At weeks 9:<br>16S rRNA gene sequencing-Illumina HiSeq 2500 platform | V4-V5 | CUMS-depression and control at weeks 9 and 15         | Kruskal-Wallis H test with Tukey's posthoc tests: p < 0.05<br>LEIS: p < 0.05 and LDA > 2.0    |

|                                     |                            |       |              |             |                                                                                                                                                                                                               |              |        |                                                                                                                                                                                                          |                                                                                                                                              |               |         |                                                                       |       |                                                                             |                                                                                         |
|-------------------------------------|----------------------------|-------|--------------|-------------|---------------------------------------------------------------------------------------------------------------------------------------------------------------------------------------------------------------|--------------|--------|----------------------------------------------------------------------------------------------------------------------------------------------------------------------------------------------------------|----------------------------------------------------------------------------------------------------------------------------------------------|---------------|---------|-----------------------------------------------------------------------|-------|-----------------------------------------------------------------------------|-----------------------------------------------------------------------------------------|
|                                     |                            |       |              |             | At weeks 15:<br>CUMS (N=6)<br>CUMS+Amiripryline (N=6)<br>CUMS+Fluoxetine (N=7)<br>Control (N=12)                                                                                                              |              |        |                                                                                                                                                                                                          |                                                                                                                                              |               |         | At weeks 15:<br>Shotgun metagenomics-<br>Illumina HiSeq 4000 platform | NA    |                                                                             |                                                                                         |
| Zhang Y et al. 2021 <sup>[39]</sup> | Sprague-Dawley rats        | China | case-control | -           | CUMS-depression<br>CUMS (N=9)<br>CUMS+Fluoxetine (N=9)<br>CUMS+Green tea (N=9)<br>CUMS+low-dose jasmine tea (N=9)<br>CUMS+middle-dose jasmine tea (N=9)<br>CUMS+high-dose jasmine tea (N=9)<br>Control (N=9)  | 4 weeks      | male   | Body weight <br>SPT: sugar preference <br>FST: immobility time <br>OFT: inner/outer/staging number                                                                                                       | After 1 week of acclimatization, feces of rats in each group at day 29 were collected                                                        | Fecal samples | -80 °C  | 16S rRNA gene sequencing-<br>Illumina MiSeq platform                  | V3-V4 | CUMS-depression and control                                                 | ANOVA followed by Bonferroni's test: p < 0.05                                           |
| Zhang Y et al. 2019 <sup>[39]</sup> | C57BL/6 mice               | China | case-control | -           | NLRP3-KO anti-depression<br>NLRP3-KO (N=14)<br>Wild-type (N=14)<br><br>CUS-depression<br>ABX FMT-NLRP3-KO CUS (N=16)<br>ABX FMT-NLRP3-KO Control (N=15)<br>ABX FMT-WT CUS (N=14)<br>ABX FMT-WT Control (N=15) | 6-8-week-old | male   | NLRP3-KO:<br>FST: immobility time <br>TST: immobility time <br>OFT: total distance , center time , center distance <br>CUS:<br>SPT: sucrose preference <br>FST: immobility time <br>TST: immobility time | Unspecified                                                                                                                                  | Fecal samples | -       | 16S rRNA gene sequencing-<br>-                                        | V4-V5 | NLRP3-KO anti-depression and wild-type<br><br>FMT-WT CUS and FMT-WT Control | Mann-Whitney test: p < 0.05                                                             |
| Zhang Z et al. 2021 <sup>[39]</sup> | C57BL/6 mice               | China | case-control | -           | Offspring of prenatal IS-depression<br>Prenatal IS (N=12)<br>Control (N=12)                                                                                                                                   | 6-8 week-old | female | EPM: open arm time , closed arm time <br>LDT: dark area time <br>SPT: sucrose preference <br>FST: immobility time                                                                                        | Fecal samples were collected from F1 adult female mice at 6-8 weeks old                                                                      | Fecal samples | -80°C   | 16S rRNA gene sequencing-<br>Illumina MiSeq platform                  | V3-V4 | Prenatal IS-depression and control                                          | LEIS: p < 0.05 and LDA > 2.0                                                            |
| Zhang Z et al. 2020 <sup>[39]</sup> | athymic nude mice (NCR-nu) | China | case-control | 5 mice/cage | CRS-depression<br>CRS-CRC xenografts (N=15)<br>CRS-Fluoxetine-CRC xenografts (N=15)<br>CRS-Xiaoyaosan-low-CRC xenografts (N=15)<br>CRS-Xiaoyaosan-high-CRC xenografts (N=15)<br>Control-CRC xenografts (N=15) | 6-7 week-old | male   | SPT: sucrose preference <br>TST: immobility time                                                                                                                                                         | After 7 days of acclimatization, 14 days of CRS, 42 days of behavioural tests, tumour cell injection, and fluoxetine or xiaoyaosan treatment | Fecal samples | -       | 16S rRNA gene sequencing-<br>Illumina MiSeq platform                  | V3-V4 | CRS-depression and control                                                  | LEIS: p < 0.05 and LDA ≥ 2.0                                                            |
| Zhang Z et al. 2022 <sup>[39]</sup> | C57BL/6 mice               | China | case-control | Single      | CRS-depression<br>CRS (N=7)<br>CRS-Hyperforin (N=7)<br>Control (N=7)                                                                                                                                          | 7-9 weeks    | male   | SPT: sucrose preference                                                                                                                                                                                  | After 1 week of acclimatization and 10 days of CRS and hyperforin treatment                                                                  | Fecal samples | Dry ice | Full-length 16S rRNA gene sequencing-PacBio platform                  | -     | CRS-depression and control                                                  | Metastat analysis: p < 0.05                                                             |
| Zhao B et al. 2020 <sup>[39]</sup>  | C57BL/6 mice               | China | case-control | -           | DSS-depression<br>DSS (N=12)<br>DSS+Lycopene (N=12)<br>Control (N=12)                                                                                                                                         | 8-week-old   | male   | OFT: path length , dwell time <br>BMT: marbles buried <br>TST: immobility time <br>EPM: percentage of open arm entries                                                                                   | After 35 days of corresponding diet and 7 days of DSS treatment                                                                              | Fecal samples | -80°C   | 16S rRNA gene sequencing-<br>Illumina MiSeq platform                  | V3-V4 | DSS-depression and control                                                  | Kruskal-Wallis test or Wilcoxon rank-sum test: p < 0.05<br>LEIS: p < 0.05 and LDA > 3.0 |
| Zhao F et al. 2021 <sup>[39]</sup>  | Sprague-Dawley rats        | China | case-control | single      | CUMS-depression<br>Pregnant rat<br>CUMS (N=8)<br>CUMS+LBP (N=8)                                                                                                                                               | 200 ± 20 g   | female | SPT: sucrose preference <br>OFT: horizontal and vertical movements                                                                                                                                       | Fresh feces were collected from female rats at 21 days after CUMS procedure, feces of the                                                    | Fecal samples | -80°C   | 16S rRNA gene sequencing-<br>Illumina MiSeq platform                  | V3-V4 | Pregnant rat<br>CUMS-depression and control                                 | One-way ANOVA followed by Bonferroni multiple comparison test: p < 0.05                 |

|                                      |                             |       |              |              |                                       |                                                                                                                                                   |                |                     |                                                                                                                                       |                                                                                              |                                    |                 |                                                                                             |                |                                                   |                                                           |
|--------------------------------------|-----------------------------|-------|--------------|--------------|---------------------------------------|---------------------------------------------------------------------------------------------------------------------------------------------------|----------------|---------------------|---------------------------------------------------------------------------------------------------------------------------------------|----------------------------------------------------------------------------------------------|------------------------------------|-----------------|---------------------------------------------------------------------------------------------|----------------|---------------------------------------------------|-----------------------------------------------------------|
|                                      |                             |       |              | 4 rats/cage  | Offspring of prenatal CUMS-depression | Control (N=8)<br>Offspring of Prenatal CUMS (N=16)<br>Prenatal CUMS+LBP (N=16)<br>Control (N=16)                                                  | PND 20         | female : male (1:1) | Offspring<br>Body weight <br>SPT: sucrose preference  <br>OFT: horizontal and vertical movements <br>TST: immobility time             | offspring were collected at PND 20                                                           |                                    |                 |                                                                                             |                | Offspring of Prenatal CUMS-depression and control |                                                           |
| Zhao W et al. 2019 <sup>[200]</sup>  | C57BL/6J mice               | China | case-control | -            | ABX FMT-Alc depression                | ABX FMT-Alc (N=14)<br>ABX FMT-Con (N=14)<br>Control (N=12)                                                                                        | 6 week-old     | male                | OFT: center time , center distance <br>EPM: open arms time and entries <br>TST: immobility time                                       | After 21 days of antibiotics administration and 13 days of FMT                               | Fecal samples                      | -80 °C          | 16S rRNA gene sequencing-                                                                   | V3-V5          | ABX FMT-Alc depression and ABX FMT-control        | Student's unpaired t-test and Mann-Whitney test: p < 0.05 |
| Zhao Z et al. 2020 <sup>[201]</sup>  | BALB/c mice                 | China | case-control | 10 mice/cage | Antibiotic-depression                 | Ceftriaxone (N=20)<br>Control (N=20)                                                                                                              | 6-8 week-old   | male                | Body weight <br>OFT: center time , center distance , peripheral time , peripheral distance <br>TST: activity phase , quiescence phase | After 1 week of acclimatization and 11 weeks of ceftriaxone sodium solution intragastrically | Fecal samples                      | -80 °C          | 16S rRNA gene sequencing-Illumina MiSeq platform                                            | V3-V4          | Antibiotic-depression and control                 | One-way ANOVA or Wilcoxon rank sum test: p < 0.05         |
| Zheng P et al. 2016 <sup>[202]</sup> | Kunming mice                | China | case-control | 5 mice/cage  | GF FMT-depression                     | GF FMT-MDD (N=63)<br>GF FMT-HC (N=69)                                                                                                             | 6-8 week-old   | male                | OFT: proportion of center motion distance <br>FST: duration of immobility <br>TST: duration of immobility                             | 2 weeks post FMT                                                                             | Fecal samples<br><br>Cecum samples | -80 °C          | 16S rRNA gene sequencing-Roche 454 sequencing<br><br>Shotgun metagenomic-Illumina HiSeq2500 | V3-V5<br><br>- | FMT-MDD and FMT-HC                                | Random Forests                                            |
| Zheng P et al. 2020 <sup>[203]</sup> | Macaca fascicularis monkeys | China | case-control | group        | Naturally-occurring depression        | Depression (N=6)<br>Control (N=6)                                                                                                                 | Adult          | female              | Duration of huddle and sit-alone behaviors <br>Duration of amicable and locomotion activities                                         | After behavioral tests                                                                       | Cecum contents                     | -80 °C          | 16S rRNA gene sequencing-Illumina MiSeq platform<br>Metagenomic-Illumina HiSeq X platform   | V3-V4<br><br>- | Naturally-occurring depression and control        | LEIS: p < 0.05 and LDA > 2.0                              |
| Zhou H et al. 2022 <sup>[204]</sup>  | C57BL/6 mice                | China | case-control | -            | Dcf1 KO-depression                    | Dcf1 KO (N=5)<br>Dcf1 KO+ B. longum (N=5)<br>Dcf1 KO+ L. marinus (N=5)<br>Dcf1 KO+ L. reuteri (N=5)<br>WT (N=5)<br>WT+Fecal of Dcf1 KO mice (N=5) | Adult, 20-25 g | male                | SPT: sucrose preference <br>FST: immobility time <br>TST: immobility time                                                             | -                                                                                            | Fecal samples                      | -               | 16S rRNA gene sequencing-                                                                   | Unspecified    | Dcf1 KO depression and wild-type                  | -                                                         |
| Zhu HZ et al. 2019 <sup>[205]</sup>  | Sprague-Dawley rats         | China | case-control | -            | CRS-depression                        | CRS (N=13)<br>CRS+Xiaoyaosan (N=13)<br>CRS+Flaxosine (N=13)<br>Control (N=13)                                                                     | 200 ± 20 g     | male                | Body weight <br>SPT: sugar preference  <br>OFT: residence time , total distance , number of entries                                   | After 7 days of acclimatization and 21 days of CRS                                           | Fecal samples                      | -20 °C          | 16S rRNA gene sequencing-Illumina-MiSeq high-throughput sequencing platform                 | V3-V4          | CRS-depression and control                        | Metastats: p < 0.05<br>LEIS: p < 0.05 and LDA > 2.0       |
| Zhu JP et al. 2021 <sup>[206]</sup>  | Sprague-Dawley rats         | China | case-control | -            | CUMS-depression                       | CUMS (N=12)<br>CUMS+Flaxosine (N=12)<br>CUMS+low-dose BHT (N=12)<br>CUMS+middle-dose BHT (N=12)<br>CUMS+high-dose BHT (N=12)<br>Control (N=12)    | 230-250 g      | male                | SPT: sucrose preference <br>OFT: horizontal crossings , vertical erections                                                            | After 5 days of acclimatization and 30 consecutive days of CUMS                              | Rectum contents                    | Liquid nitrogen | 16S rRNA sequencing analysis-Shanghai Biotech Biotechnology Co., Ltd.                       | Unspecified    | CUMS-depression and control                       | One-way ANOVA or Kruskal-Wallis H test: p < 0.05          |

## References

1. A. Abildgaard, T. Kern, O. Pedersen, T. Hansen, S. Lund and G. Wegener, *Eur Neuropsychopharmacol* **2021**, *43*, 10-21.
2. Y. Aitbali, S. Ba-M'hamed, N. Elhidar, A. Nafis, N. Soraa and M. Bennis, *Neurotoxicol Teratol* **2018**, *67*, 44-49.
3. H. Amini-Khoei, E. Haghani-Samani, M. Beigi, A. Soltani, G. R. Mobini, S. Balali-Dehkordi, A. Haj-Mirzaian, M. Rafieian-Kopaei, A. Alizadeh, M. R. Hojjati and M. Validi, *Int Immunopharmacol* **2019**, *66*, 242-250.
4. Q. An, C. Li, Y. Chen, Y. Yang, R. Song, L. Zhou, J. Li, A. Tong and Y. Luo, *Pharmacol Biochem Behav* **2020**, *192*, 172910.
5. A. Arslanova, A. Tarasova, A. Alexandrova, V. Novoselova, I. Shaidullova, D. Khusnutdinova, T. Grigoryeva, D. Yarullina, O. Yakovleva and G. Sitdikova, *Life (Basel)* **2021**, *11*,
6. A. Bharwani, M. F. Mian, M. G. Surette, J. Bienenstock and P. Forsythe, *BMC Med* **2017**, *15*, 7.
7. L. C. Bridgewater, C. Zhang, Y. Wu, W. Hu, Q. Zhang, J. Wang, S. Li and L. Zhao, *Sci Rep* **2017**, *7*, 10776.
8. A. Burokas, S. Arboleya, R. D. Moloney, V. L. Peterson, K. Murphy, G. Clarke, C. Stanton, T. G. Dinan and J. F. Cryan, *Biol Psychiatry* **2017**, *82*, 472-487.
9. C. Cao, M. Liu, S. Qu, R. Huang, M. Qi, Z. Zhu, J. Zheng, Z. Chen, Z. Wang, Z. Han, Y. Zhu, F. Huang and J.-A. Duan, *J Ethnopharmacol* **2020**, *261*, 113055.
10. A. Chakraborti, C. Graham, S. Chehade, B. Vashi, A. Umfress, P. Kurup, B. Vickers, H. A. Chen, R. Telange, T. Berryhill, W. Van Der Pol, M. Powell, S. Barnes, C. Morrow, D. L. Smith, M. S. Mukhtar, S. Watts, G. Kennedy and J. Bibb, *Front Neurosci* **2021**, *15*, 669410.
11. L. Chen, W. Qing, Z. Yi, G. Lin, Q. Peng and F. Zhou, *Front Nutr* **2021**, *8*, 701760.
12. P. Chen, M. Hei, L. Kong, Y. Liu, Y. Yang, H. Mu, X. Zhang, S. Zhao and J. Duan, *Food Funct* **2019**, *10*, 8161-8171.
13. T. Chen, R. Wang, Z. Duan, X. Yuan, Y. Ding, Z. Feng, F. Bu, L. Liu, Q. Wang, J. Zhou, L. Zhu, Q. Ni, G. Shi and Y. Chen, *Front Cell Infect Microbiol* **2021**, *11*, 723856.
14. X. Chen, S. Meng, S. Li, L. Zhang, L. Wu, H. Zhu and Y. Zhang, *Biomed Res Int* **2021**, *2021*, 5516604.
15. X. Chen, S. Meng, Y. Yu, S. Li, L. Wu and Y. Zhang, *Int J Occup Med Environ Health* **2022**, *35*,
16. Y. Chen, M. Wan, Y. Zhong, T. Gao, Y. Zhang, F. Yan, D. Huang, Y. Wu and Z. Weng, *Mol Nutr Food Res* **2021a**, *65*, e2100146.

17. Y. Chen, N. Xiao, Y. Chen, X. Chen, C. Zhong, Y. Cheng, B. Du and P. Li, *Food Res Int* **2021b**, *150*, 110808.
18. D. Cheng, H. Chang, S. Ma, J. Guo, G. She, F. Zhang, L. Li, X. Li and Y. Lu, *Molecules* **2018**, *23*,
19. R. Cheng, W. Xu, J. Wang, Z. Tang and M. Zhang, *Biochem Biophys Res Commun* **2021**, *566*, 170-176.
20. G. Chevalier, E. Siopi, L. Guenin-Macé, M. Pascal, T. Laval, A. Rifflet, I. G. Boneca, C. Demangel, B. Colsch, A. Pruvost, E. Chu-Van, A. Messenger, F. Leulier, G. Lepousez, G. Eberl and P.-M. Lledo, *Nat Commun* **2020**, *11*, 6363.
21. L. Chi, I. Khan, Z. Lin, J. Zhang, M. Y. S. Lee, W. Leong, W. L. W. Hsiao and Y. Zheng, *Phytomedicine* **2020**, *67*, 153157.
22. J. Choi, H. Kwon, Y.-K. Kim and P.-L. Han, *Mol Neurobiol* **2022**, *59*, 2715-2728.
23. V. Daugé, C. Philippe, M. Mariadassou, O. Rué, J.-C. Martin, M.-N. Rossignol, N. Dourmap, L. Sivilar, F. Tourniaire, M. Monnoye, D. JarDET, M. Bangratz, S. Holowacz, S. Rabot and L. Naudon, *Front Behav Neurosci* **2020**, *14*, 581296.
24. Y. Deng, M. Zhou, J. Wang, J. Yao, J. Yu, W. Liu, L. Wu, J. Wang and R. Gao, *Gut Microbes* **2021**, *13*,
25. J. Dhaliwal, D. P. Singh, S. Singh, A. K. Pinnaka, R. K. Boparai, M. Bishnoi, K. K. Kondepudi and K. Chopra, *J Appl Microbiol* **2018**, *125*, 257-269.
26. Y. Ding, F. Bu, T. Chen, G. Shi, X. Yuan, Z. Feng, Z. Duan, R. Wang, S. Zhang, Q. Wang, J. Zhou and Y. Chen, *Appl Microbiol Biotechnol* **2021**, *105*, 8411-8426.
27. S. Diviccaro, S. Giatti, F. Borgo, M. Barcella, E. Borghi, J. L. Trejo, L. M. Garcia-Segura and R. C. Melcangi, *Psychoneuroendocrinology* **2019**, *99*, 206-215.
28. F. Donoso, S. Egerton, T. F. S. Bastiaanssen, P. Fitzgerald, S. Gite, F. Fouhy, R. P. Ross, C. Stanton, T. G. Dinan and J. F. Cryan, *Psychoneuroendocrinology* **2020**, *116*, 104673.
29. H.-X. Du, Y. Liu, L.-G. Zhang, C.-S. Zhan, J. Chen, M. Zhang, X.-G. Chen, L. Zhang and C.-Z. Liang, *Prostate* **2020**, *80*, 663-673.
30. J. Duan, Y. Huang, X. Tan, T. Chai, J. Wu, H. Zhang, Y. Li, X. Hu, P. Zheng, P. Ji, L. Zhao, D. Yang, L. Fang, J. Song and P. Xie, *Transl Psychiatry* **2021**, *11*, 303.
31. S. Egerton, F. Donoso, P. Fitzgerald, S. Gite, F. Fouhy, J. Whooley, T. G. Dinan, J. F. Cryan, S. C. Culloty, R. P. Ross and C. Stanton, *Nutr Neurosci* **2020**, *25*, 356-378.
32. S. El Aidy, A. S. Ramsteijn, F. Dini-Andreote, R. van Eijk, D. J. Houwing, J. F. Salles and J. D. A. Olivier, *Front Cell Neurosci* **2017**, *11*, 222.



33. L. Fan, Y. Peng, J. Wang, P. Ma, L. Zhao and X. Li, *Phytomedicine* **2021**, *83*, 153471.
34. P. Farshim, G. Walton, B. Chakrabarti, I. Givens, D. Saddy, I. Kitchen, J. R Swann and A. Bailey, *Sci Rep* **2016**, *6*, 21958.
35. Y. Feng, X. Gao, M. Meng, H. Xue and X. Qin, *J Ethnopharmacol* **2020**, *256*, 112806.
36. Z. Feng, X. Ma, S. Meng, H. Wang, X. Zhou, M. Shi and J. Zhao, *Evid Based Complement Alternat Med* **2020**, *2020*, 3290450.
37. S. Forouzan, K. L. Hoffman and T. A. Kosten, *Psychopharmacology (Berl)* **2021**, *238*, 281-292.
38. K. Gao, A. Farzi, X. Ke, Y. Yu, C. Chen, S. Chen, T. Yu, H. Wang and Y. Li, *Food Funct* **2022**, *13*, 957-969.
39. X. Gao, Y. Feng, H. Xue, M. Meng and X. Qin, *Journal of Liquid Chromatography & Related Technologies* **2020**, *43*, 494-507.
40. X. Gong, C. Huang, X. Yang, J. Chen, J. Pu, Y. He and P. Xie, *Front Neurosci* **2021**, *15*, 701355.
41. F. Gu, Y. Wu, Y. Liu, M. Dou, Y. Jiang and H. Liang, *Food Funct* **2020**, *11*, 6148-6157.
42. X. Gu, S. Zhang, W. Ma, Q. Wang, Y. Li, C. Xia, Y. Xu, T. Zhang, L. Yang and M. Zhou, *Front Microbiol* **2022**, *13*, 778512.
43. F. Guida, F. Turco, M. Iannotta, D. De Gregorio, I. Palumbo, G. Sarnelli, A. Furiano, F. Napolitano, S. Boccella, L. Luongo, M. Mazzitelli, A. Usiello, F. De Filippis, F. A. Iannotti, F. Piscitelli, D. Ercolini, V. de Novellis, V. Di Marzo, R. Cuomo and S. Maione, *Brain Behav Immun* **2018**, *67*, 230-245.
44. Y. Guo, J. Xie, X. Li, Y. Yuan, L. Zhang, W. Hu, H. Luo, H. Yu and R. Zhang, *Front Pharmacol* **2018**, *9*, 1126.
45. Y. Guo, J.-P. Xie, K. Deng, X. Li, Y. Yuan, Q. Xuan, J. Xie, X.-M. He, Q. Wang, J.-J. Li and H.-R. Luo, *Front Behav Neurosci* **2019**, *13*, 126.
46. S.-K. Han and D. H. Kim, *J Microbiol Biotechnol* **2019**, *29*, 1369-1374.
47. S.-K. Han, M.-K. Joo, J.-K. Kim, W. Jeung, H. Kang and D.-H. Kim, *Nutrients* **2020a**, *12*,
48. S.-K. Han, J.-K. Kim, M.-K. Joo, K.-E. Lee, S.-W. Han and D. H. Kim, *J Microbiol Biotechnol* **2020b**, *30*, 1222-1226.
49. S.-K. Han, J.-K. Kim, H.-S. Park, Y.-J. Shin and D.-H. Kim, *Chin Med* **2021**, *16*, 77.

50. W. Hao, J. Wu, N. Yuan, L. Gong, J. Huang, Q. Ma, H. Zhu, H. Gan, X. Da, L. Deng, X. Li and J. Chen, *Front Pharmacol* **2021**, *12*, 619103.
51. W.-Z. Hao, Q.-Y. Ma, G. Tao, J.-Q. Huang and J.-X. Chen, *Food Funct* **2021**, *12*, 12550-12564.
52. A. M. Hassan, G. Mancano, K. Kashofer, E. E. Fröhlich, A. Matak, R. Mayerhofer, F. Reichmann, M. Olivares, A. M. Neyrinck, N. M. Delzenne, S. P. Claus and P. Holzer, *Nutr Neurosci* **2019**, *22*, 877-893.
53. F. Huang, X. Liu, S. Xu, S. Hu, S. Wang, D. Shi, K. Wang, Z. Wang, Q. Lin, S. Li, S. Zhao, K. Jin, C. Wang, L. Chen and F. Wang, *Front Nutr* **2021**, *8*, 805465.
54. N. Huang, D. Hua, G. Zhan, S. Li, B. Zhu, R. Jiang, L. Yang, J. Bi, H. Xu, K. Hashimoto, A. Luo and C. Yang, *Pharmacol Biochem Behav* **2019**, *176*,
55. Y.-J. Huang, L.-X. C. Choong, S. Panyod, Y.-E. Lin, H.-S. Huang, K.-H. Lu, W.-K. Wu and L.-Y. Sheen, *Phytother Res* **2021**, *35*, 5133-5142.
56. Y.-Y. Huang, Y.-P. Wu, X.-Z. Jia, J. Lin, L.-F. Xiao, D.-M. Liu and M.-H. Liang, *Food Funct* **2022**, *13*, 411-424.
57. A. Inserra, J. M. Choo, M. D. Lewis, G. B. Rogers, M.-L. Wong and J. Licinio, *Sci Rep* **2019**, *9*, 6456.
58. H.-M. Jang, K.-E. Lee and D.-H. Kim, *Nutrients* **2019**, *11*,
59. S. Ji, S. Han, L. Yu, L. Du, Y. You, J. Chen, M. Wang, S. Wu, S. Li, X. Sun, R. Luo and X. Zhao, *Phytomedicine* **2022**, *98*, 153940.
60. W. Jiang, L. Gong, F. Liu, Y. Ren and J. Mu, *Front Cell Infect Microbiol* **2021**, *11*, 663967.
61. Y. Jiang, Y. Liu, M. Gao, M. Xue, Z. Wang and H. Liang, *Food Funct* **2020**, *11*, 378-391.
62. L. Jianguo, J. Xueyang, W. Cui, W. Changxin and Q. Xuemei, *Transl Psychiatry* **2019**, *9*, 40.
63. Y. Kamimura, E. Kuwagaki, S. Hamano, M. Kobayashi, Y. Yamada, Y. Takahata, W. Yoshimoto, H. Morimoto, T. Yasukawa, Y. Uozumi and K. Nagasawa, *Life Sci* **2021**, *282*, 119821.
64. C. Karen, D. J. H. Shyu and K. E. Rajan, *Front Neurosci* **2021**, *15*, 719933.
65. J. R. Kelly, Y. Borre, C. O'Brien, E. Patterson, S. El Aidy, J. Deane, P. J. Kennedy, S. Beers, K. Scott, G. Moloney, A. E. Hoban, L. Scott, P. Fitzgerald, P. Ross, C. Stanton, G. Clarke, J. F. Cryan and T. G. Dinan, *J Psychiatr Res* **2016**, *82*, 109-118.
66. K. M. Kemp, J. Colson, R. G. Lorenz, C. L. Maynard and J. S. Pollock, *Am J Physiol Regul Integr Comp Physiol* **2021**, *320*, R663-R674.

67. J.-K. Kim, K.-E. Lee, S.-A. Lee, H.-M. Jang and D.-H. Kim, *Front Immunol* **2020**, *11*, 273.
68. J.-K. Kim, S.-K. Han, M.-K. Joo and D.-H. Kim, *Sci Rep* **2021**, *11*, 6094.
69. J. K. Knudsen, T. Y. Michaelsen, C. Bundgaard-Nielsen, R. E. Nielsen, S. Hjerrild, P. Leutscher, G. Wegener and S. Sorensen, *Sci Rep* **2021**, *11*, 21869.
70. A. Kosuge, K. Kunisawa, S. Arai, Y. Sugawara, K. Shinohara, T. Iida, B. Wulaer, T. Kawai, H. Fujigaki, Y. Yamamoto, K. Saito, T. Nabeshima and A. Mouri, *Brain Behav Immun* **2021**, *96*, 200-211.
71. D. Kuti, Z. Winkler, K. Horváth, B. Juhász, M. Paholsek, A. Stágel, G. Gulyás, L. Czeglédi, S. Ferenczi and K. J. Kovács, *Brain Behav Immun* **2020**, *84*, 218-228.
72. W.-D. Lai, T.-H. Tung, C.-Y. Teng, C.-H. Chang, Y.-C. Chen, H.-Y. Huang, H.-C. Lee and S.-Y. Huang, *Food Funct* **2022**, *13*, 2662-2680.
73. S. Leclercq, T. Le Roy, S. Furgieue, V. Coste, L. B. Bindels, Q. Leyrolle, A. M. Neyrinck, C. Quoilin, C. Amadieu, G. Petit, L. Dricot, V. Tagliatti, P. D. Cani, K. Verbeke, J.-M. Colet, P. Stärkel, P. de Timary and N. M. Delzenne, *Cell Rep* **2020**, *33*, 108238.
74. H.-C. Lee, Y.-C. Lo, S.-C. Yu, T.-H. Tung, I. H. Lin and S.-Y. Huang, *Int J Food Sci Nutr* **2020**, *71*, 440-452.
75. H. Li, P. Wang, L. Huang, P. Li and D. Zhang, *Neurogastroenterol Motil* **2019**, *31*, e13677.
76. H. Li, Y. Xiang, Z. Zhu, W. Wang, Z. Jiang, M. Zhao, S. Cheng, F. Pan, D. Liu, R. C. M. Ho and C. S. H. Ho, *J Neuroinflammation* **2021**, *18*, 254.
77. N. Li, Q. Wang, Y. Wang, A. Sun, Y. Lin, Y. Jin and X. Li, *Front Behav Neurosci* **2018**, *12*, 266.
78. N. Li, Q. Wang, Y. Wang, A. Sun, Y. Lin, Y. Jin and X. Li, *Stress* **2019**, *22*, 592-602.
79. P. Li, W. Huang, Y.-N. Yan, W. Cheng, S. Liu, Y. Huang, W. Chen, Y.-P. Chen, Y. Gao, W. Lu, Y. Xu and X. Meng, *Med Sci Monit* **2021**, *27*, e929027.
80. Q. Li, L. Li, X. Niu, C. Tang, H. Wang, J. Gao and J. Hu, *Neuroreport* **2021**, *32*, 686-693.
81. Y. Li, Y. Peng, P. Ma, H. Yang, H. Xiong, M. Wang, C. Peng, P. Tu and X. Li, *Front Pharmacol* **2018**, *9*, 967.
82. E. Y. Lim, E. J. Song, J. G. Kim, S. Y. Jung, S. Y. Lee, H. S. Shin, Y. D. Nam and Y. T. Kim, *Benef Microbes* **2021**, *12*, 503-516.
83. S. Lin, Q. Li, S. Jiang, Z. Xu, Y. Jiang, L. Liu, J. Jiang, Y. Tong and P. Wang, *J Ethnopharmacol* **2021**, *268*, 113608.

84. Q. F. Liu, H.-M. Kim, S. Lim, M.-J. Chung, C.-Y. Lim, B.-S. Koo and S.-S. Kang, *Daru* **2020**, *28*, 181-189.
85. X. Liu, T. Teng, X. Li, L. Fan, Y. Xiang, Y. Jiang, K. Du, Y. Zhang, X. Zhou and P. Xie, *Front Cell Infect Microbiol* **2021a**, *11*, 697640.
86. X. Liu, M. Lv, Y. Wang, P. Qu, S. Li, Z. Yu and X. Qin, *Phytomedicine* **2021b**, *87*, 153581.
87. Z. Liu, L. Li, S. Ma, J. Ye, H. Zhang, Y. Li, A. T. Sair, J. Pan, X. Liu, X. Li, S. Yan and X. Liu, *J Agric Food Chem* **2020**, *68*, 13697-13710.
88. X. Luo, X. Huang, Z. Luo, Z. Wang, G. He, Y. Tan, B. Zhang, H. Zhou, P. Li, T. Shen, X. Yu and X. Yang, *Ecotoxicol Environ Saf* **2021**, *228*, 112980.
89. M. Lv, Y. Wang, P. Qu, S. Li, Z. Yu, X. Qin and X. Liu, *J Ethnopharmacol* **2021**, *276*, 114167.
90. W.-J. Lv, X.-L. Wu, W.-Q. Chen, Y.-F. Li, G.-F. Zhang, L.-M. Chao, J.-H. Zhou, A. Guo, C. Liu and S.-N. Guo, *Oxid Med Cell Longev* **2019**, *2019*, 7902874.
91. W.-J. Lv, C. Liu, L.-Z. Yu, J.-H. Zhou, Y. Li, Y. Xiong, A. Guo, L.-M. Chao, Q. Qu, G.-W. Wei, X.-G. Tang, Y.-L. Yin and S.-N. Guo, *Oxid Med Cell Longev* **2020**, *2020*, 1241894.
92. W. Ma, J. Song, H. Wang, F. Shi, N. Zhou, J. Jiang, Y. Xu, L. Zhang, L. Yang and M. Zhou, *Life Sci* **2019**, *225*, 88-97.
93. I. A. Marin, J. E. Goertz, T. Ren, S. S. Rich, S. Onengut-Gumuscu, E. Farber, M. Wu, C. C. Overall, J. Kipnis and A. Gaultier, *Sci Rep* **2017**, *7*, 43859.
94. D. Martín-Hernández, J. R. Caso, Á. G. Bris, S. R. Maus, J. L. M. Madrigal, B. García-Bueno, K. S. MacDowell, L. Alou, M. L. Gómez-Lus and J. C. Leza, *Neuropharmacology* **2016**, *103*, 122-133.
95. Y. Matsuda, N. Ozawa, T. Shinozaki, K.-I. Wakabayashi, K. Suzuki, Y. Kawano, I. Ohtsu and Y. Tatebayashi, *Transl Psychiatry* **2020**, *10*, 170.
96. K. D. McGaughey, T. Yilmaz-Swenson, N. M. Elsayed, D. A. Cruz, R. M. Rodriguiz, M. D. Kritzer, A. V. Peterchev, J. Roach, W. C. Wetsel and D. E. Williamson, *Sci Rep* **2019**, *9*, 3281.
97. E. M. Medina-Rodriguez, D. Madorma, G. O'Connor, B. L. Mason, D. Han, S. K. Deo, M. Oppenheimer, C. B. Nemeroff, M. H. Trivedi, S. Daunert and E. Beurel, *Am J Psychiatry* **2020**, *177*, 974-990.
98. C. Meng, S. Feng, Z. Hao, C. Dong and H. Liu, *Psychoneuroendocrinology* **2022**, *136*, 105620.
99. A. Moya-Pérez, A. Perez-Villalba, A. Benítez-Páez, I. Campillo and Y. Sanz, *Brain Behav Immun* **2017**, *65*, 43-56.
100. E. Murray, R. Sharma, K. B. Smith, K. D. Mar, R. Barve, M. Lukasik, A. F. Pirwani, E. Malette-Guyon, S. Lamba, B. J. Thomas, H. Sadeghi-Emamchaie, J. Liang, J.-F. Mallet, C. Matar and N. Ismail, *Brain Behav Immun* **2019**, *81*, 198-212.

101. S. M. O'Mahony, K.-A. McVey Neufeld, R. V. Waworuntu, M. M. Puscaddu, S. Manurung, K. Murphy, C. Strain, M. C. Laguna, V. L. Peterson, C. Stanton, B. M. Berg, T. G. Dinan and J. F. Cryan, *Eur J Neurosci* **2020**, *51*, 1042-1058.
102. A. Osman, S. Zuffa, G. Walton, E. Fagbodun, P. Zanos, P. Georgiou, I. Kitchen, J. Swann and A. Bailey, *iScience* **2021**, *24*, 103048.
103. K. A. Partrick, A. M. Rosenhauer, J. Auger, A. R. Arnold, N. M. Ronczkowski, L. M. Jackson, M. N. Lord, S. M. Abdulla, B. Chassaing and K. L. Huhman, *Sci Rep* **2021**, *11*, 3763.
104. E. Patterson, P. M. Ryan, N. Wiley, I. Carafa, E. Sherwin, G. Moloney, E. Franciosi, R. Mandal, D. S. Wishart, K. Tuohy, R. P. Ross, J. F. Cryan, T. G. Dinan and C. Stanton, *Sci Rep* **2019**, *9*, 16323.
105. J. Pearson-Leary, C. Zhao, K. Bittinger, D. Eacret, S. Luz, A. S. Vigderman, G. Dayanim and S. Bhatnagar, *Mol Psychiatry* **2020**, *25*, 1068-1079.
106. Y. Pu, Y. Tan, Y. Qu, L. Chang, S. Wang, Y. Wei, X. Wang and K. Hashimoto, *Brain Behav Immun* **2021**, *94*, 318-326.
107. M. M. Puscaddu, S. El Aidy, F. Crispie, O. O'Sullivan, P. Cotter, C. Stanton, P. Kelly, J. F. Cryan and T. G. Dinan, *PLoS One* **2015**, *10*, e0139721.
108. Y. Qiao, J. Zhao, C. Li, M. Zhang, L. Wei, X. Zhang, O. Kurskaya, H. Bi and T. Gao, *Ann Transl Med* **2020**, *8*, 942.
109. X. Qiu, G. Wu, L. Wang, Y. Tan and Z. Song, *Ann Transl Med* **2021**, *9*, 366.
110. W. Qu, S. Liu, W. Zhang, H. Zhu, Q. Tao, H. Wang and H. Yan, *Food Funct* **2019**, *10*, 5886-5897.
111. Y. Qu, C. Yang, Q. Ren, M. Ma, C. Dong and K. Hashimoto, *Sci Rep* **2017**, *7*, 15725.
112. Y. Qu, K. Zhang, Y. Pu, L. Chang, S. Wang, Y. Tan, X. Wang, J. Zhang, T. Ohnishi, T. Yoshikawa and K. Hashimoto, *J Affect Disord* **2020**, *272*, 66-76.
113. Y. Qu, C. Su, Q. Zhao, A. Shi, F. Zhao, L. Tang, D. Xu, Z. Xiang, Y. Wang, Y. Wang, J. Pan and Y. Yu, *Front Pharmacol* **2022**, *13*, 837543.
114. J. Rao, R. Xie, L. Lin, J. Jiang, L. Du, X. Zeng, G. Li, C. Wang and Y. Qiao, *Eur J Neurosci* **2021**, *53*, 3598-3611.
115. P. Ray, U. Pandey, D. Das and P. Aich, *Dig Dis Sci* **2021**, *66*, 3776-3791.
116. R. C. Robertson, C. Seira Oriach, K. Murphy, G. M. Moloney, J. F. Cryan, T. G. Dinan, R. Paul Ross and C. Stanton, *Brain Behav Immun* **2017**, *59*, 21-37.
117. J. M. Rosa, F. L. Pazini, A. Camargo, I. A. V. Wolin, G. Olescowicz, L. B. Eslabão, O. B. Romero, E. C. Winkelmann-Duarte and A. L. S. Rodrigues, *Behav Brain Res* **2020**, *393*, 112791.

118. A. K. Schmidtner, D. A. Slattery, J. Gläsner, A. Hiergeist, K. Gryksa, V. A. Malik, J. Hellmann-Regen, I. Heuser, T. C. Baghai, A. Gessner, R. Rupprecht, B. Di Benedetto and I. D. Neumann, *Transl Psychiatry* **2019**, *9*, 223.
119. B. Shan, Z. Ai, S. Zeng, Y. Song, J. Song, Q. Zeng, Z. Liao, T. Wang, C. Huang and D. Su, *Psychoneuroendocrinology* **2020**, *117*, 104699.
120. S. Shao, R. Jia, L. Zhao, Y. Zhang, Y. Guan, H. Wen, J. Liu, Y. Zhao, Y. Feng, Z. Zhang, Q. Ji, Q. Li and Y. Wang, *Phytomedicine* **2021**, *88*, 153606.
121. L. Sheng, Y. Wang, A. Jiang, Y. Zhou, H. Zhou and F. M. El-Demerdash, *Journal of Food Quality* **2021**, *2021*, 1-8.
122. E. Siopi, G. Chevalier, L. Katsimparidi, S. Saha, M. Bigot, C. Moigneu, G. Eberl and P.-M. Lledo, *Cell Rep* **2020**, *30*,
123. J. Song, W. Ma, X. Gu, L. Zhao, J. Jiang, Y. Xu, L. Zhang, M. Zhou and L. Yang, *J Transl Med* **2019a**, *17*, 224.
124. J. Song, N. Zhou, W. Ma, X. Gu, B. Chen, Y. Zeng, L. Yang and M. Zhou, *Food Funct* **2019b**, *10*, 2947-2957.
125. X. Song, W. Wang, S. Ding, X. Liu, Y. Wang and H. Ma, *J Affect Disord* **2021**, *290*, 353-363.
126. W. N. Sovijit, W. E. Sovijit, S. Pu, K. Usuda, R. Inoue, G. Watanabe, H. Yamaguchi and K. Nagaoka, *Neurosci Res* **2019**, *168*, 76-82.
127. L. Sun, H. Zhang, Y. Cao, C. Wang, C. Zhao, H. Wang, G. Cui, M. Wang, Y. Pan, Y. Shi and Y. Nie, *Int J Med Sci* **2019a**, *16*, 1260-1270.
128. L. Sun, L. Ma, H. Zhang, Y. Cao, C. Wang, N. Hou, N. Huang, K. M. von Deneen, C. Zhao, Y. Shi, Y. Pan, M. Wang, G. Ji and Y. Nie, *Theranostics* **2019b**, *9*, 721-733.
129. X. Sun, H.-F. Zhang, C.-L. Ma, H. Wei, B.-M. Li and J. Luo, *Can J Infect Dis Med Microbiol* **2021**, *2021*, 6613903.
130. Y. Sun, W. Geng, Y. Pan, J. Wang, P. Xiao and Y. Wang, *Food Funct* **2019**, *10*, 925-937.
131. Y. Sun, T. Yan, G. Gong, Y. Li, J. Zhang, B. Wu, K. Bi and Y. Jia, *Int Immunopharmacol* **2020**, *89*, 107029.
132. K. Suzuki, K. Nakamura, Y. Shimizu, Y. Yokoi, S. Ohira, M. Hagiwara, Y. Wang, Y. Song, T. Aizawa and T. Ayabe, *Sci Rep* **2021**, *11*, 9915.
133. J. K. Szyszkowicz, A. Wong, H. Anisman, Z. Merali and M.-C. Audet, *Brain Behav Immun* **2017**, *66*, 45-55.
134. E. Takahashi and E. Ono, *Biochem Biophys Rep* **2021a**, *28*, 101152.

135. E. Takahashi and E. Ono, *Physiol Behav* **2021b**, *243*, 113623.
136. T. Teng, G. Clarke, M. Maes, Y. Jiang, J. Wang, X. Li, B. Yin, Y. Xiang, L. Fan, X. Liu, J. Wang, S. Liu, Y. Huang, J. Licinio, X. Zhou and P. Xie, *Mol Psychiatry* **2021**,
137. P. Tian, R. Zou, L. Song, X. Zhang, B. Jiang, G. Wang, Y.-K. Lee, J. Zhao, H. Zhang and W. Chen, *Food Funct* **2019a**, *10*, 7588-7598.
138. P. Tian, G. Wang, J. Zhao, H. Zhang and W. Chen, *J Nutr Biochem* **2019b**, *66*, 43-51.
139. P. Tian, K. J. O'Riordan, Y.-K. Lee, G. Wang, J. Zhao, H. Zhang, J. F. Cryan and W. Chen, *Neurobiol Stress* **2020**, *12*, 100216.
140. P. Tian, H. Zhu, X. Qian, Y. Chen, Z. Wang, J. Zhao, H. Zhang, G. Wang and W. Chen, *Front Immunol* **2021**, *12*, 755481.
141. X.-Y. Tian, J.-W. Xing, Q.-Q. Zheng and P.-F. Gao, *Front Cell Infect Microbiol* **2021**, *11*, 694443.
142. S. Tillmann, A. Abildgaard, G. Winther and G. Wegener, *Psychopharmacology (Berl)* **2019**, *236*, 1445-1457.
143. T.-H. Tung, Y.-T. Tung, I. H. Lin, C.-K. Shih, N. T. K. Nguyen, A. Shabrina and S.-Y. Huang, *Biomolecules* **2019**, *9*,
144. L. Wang, Y. Sun, T. Zhao, Y. Li, X. Zhao, L. Zhang, L. Wu, L. Zhang, T. Zhang, G. Wei, A. Altamirano, Y. Tong and Z. Yan, *Planta Med* **2020**, *86*, 172-179.
145. L. Wang, X. Wu, Y. Ma, X. Li, J. Zhang and L. Zhao, *Food Funct* **2021**, *12*, 4995-5006.
146. P. Wang, K. Tu, P. Cao, Y. Yang, H. Zhang, X.-T. Qiu, M.-M. Zhang, X.-J. Wu, H. Yang and T. Chen, *Mol Brain* **2021**, *14*, 49.
147. Q. Wang, M. Jia, Y. Zhao, Y. Hui, J. Pan, H. Yu, S. Yan, X. Dai, X. Liu and Z. Liu, *J Agric Food Chem* **2019**, *67*, 12441-12451.
148. R. Wang, T. Chen, Q. Wang, X.-M. Yuan, Z.-L. Duan, Z.-Y. Feng, Y. Ding, F. Bu, G.-P. Shi and Y.-G. Chen, *Drug Des Devel Ther* **2021**, *15*, 2999-3016.
149. S. Wang, T. Ishima, J. Zhang, Y. Qu, L. Chang, Y. Pu, Y. Fujita, Y. Tan, X. Wang and K. Hashimoto, *J Neuroinflammation* **2020a**, *17*, 241.
150. S. Wang, Y. Qu, L. Chang, Y. Pu, K. Zhang and K. Hashimoto, *J Affect Disord* **2020b**, *260*, 448-457.
151. S. Wang, T. Ishima, Y. Qu, J. Shan, L. Chang, Y. Wei, J. Zhang, Y. Pu, Y. Fujita, Y. Tan, X. Wang, L. Ma, X. Wan, B. D. Hammock and K. Hashimoto, *J Affect Disord* **2021**, *292*, 565-573.
152. Y. Wang, R. Jiang, Z. Wu, L. Zhou, J. Xu, C. Huang, L. Yang, B. Zhu, E. Yan, C. Liu and C. Yang, *Pharmacol Biochem Behav* **2021**, *207*, 173226.

153. A. K. Warda, K. Rea, P. Fitzgerald, C. Hueston, E. Gonzalez-Tortuero, T. G. Dinan and C. Hill, *Behav Brain Res* **2019**, *362*, 213-223.
154. C.-L. Wei, S. Wang, J.-T. Yen, Y.-F. Cheng, C.-L. Liao, C.-C. Hsu, C.-C. Wu and Y.-C. Tsai, *Brain Res* **2019**, *1711*, 202-213.
155. L. Wei, Y. Li, W. Tang, Q. Sun, L. Chen, X. Wang, Q. Liu, S. Yu, S. Yu, C. Liu and X. Ma, *Front Physiol* **2019**, *10*, 1228.
156. S. Westfall, F. Caracci, M. Estill, T. Frolinger, L. Shen and G. M. Pasinetti, *Front Immunol* **2021**, *12*, 670500.
157. M. L. Wong, A. Insera, M. D. Lewis, C. A. Mastronardi, L. Leong, J. Choo, S. Kentish, P. Xie, M. Morrison, S. L. Wesselingh, G. B. Rogers and J. Licinio, *Mol Psychiatry* **2016**, *21*, 797-805.
158. F. Wu, X. Guo, M. Zhang, Z. Ou, D. Wu, L. Deng, Z. Lu, J. Zhang, G. Deng, S. Chen, S. Li, J. Yi and Y. Peng, *Anaerobe* **2020**, *61*, 102138.
159. J. Wu, J. Li, C. Gaurav, U. Muhammad, Y. Chen, X. Li, J. Chen and Z. Wang, *Gen Psychiatr* **2021**, *34*, e100529.
160. J. Wu, T. Chai, H. Zhang, Y. Huang, S. W. Perry, Y. Li, J. Duan, X. Tan, X. Hu, Y. Liu, J. Pu, H. Wang, J. Song, X. Jin, P. Ji, P. Zheng and P. Xie, *Transl Psychiatry* **2022**, *12*, 74.
161. M. Wu, T. Tian, Q. Mao, T. Zou, C.-J. Zhou, J. Xie and J.-J. Chen, *Transl Psychiatry* **2020**, *10*, 350.
162. J. Xia, L. Gu, Y. Guo, H. Feng, S. Chen, J. Jurat, W. Fu and D. Zhang, *Front Cell Infect Microbiol* **2021**, *11*, 627608.
163. Q. Xiao, R. Shu, C. Wu, Y. Tong, Z. Xiong, J. Zhou, C. Yu, X. Xie and Z. Fu, *J Affect Disord* **2020**, *276*, 476-486.
164. R. Xie, P. Jiang, L. Lin, B. Yu, C. Wang, Y. Pan, J. Rao, W. Wei and Y. Qiao, *FASEB J* **2020a**, *34*, 8310-8325.
165. R. Xie, P. Jiang, L. Lin, J. Jiang, B. Yu, J. Rao, H. Liu, W. Wei and Y. Qiao, *J Psychiatr Res* **2020b**, *122*, 70-78.
166. Y. Xie, L. Song, J. Yang, T. Tao, J. Yu, J. Shi and X. Jin, *Life Sci Alliance* **2021**, *4*,
167. J. Xu, M. Tang, X. Wu, X. Kong, Y. Liu and X. Xu, *Food Funct* **2022**, *13*, 4331-4343.
168. M. Xu, P. Tian, H. Zhu, R. Zou, J. Zhao, H. Zhang, G. Wang and W. Chen, *Nutrients* **2022**, *14*,
169. Z. Xu, C. Wang, X. Dong, T. Hu, L. Wang, W. Zhao, S. Zhu, G. Li, Y. Hu, Q. Gao, J. Wan, Z. Liu and J. Sun, *Biofactors* **2019**, *45*, 187-199.
170. M. Xue, X. Teng, H. Liang, J. Zhao, Y. Jiang, X. Qiu, Z. Zhang, Z. Pei, N. Zhang and Y. Qin, *Journal of Functional Foods* **2021**, *86*,



171. T. Yan, T. Nian, Z. Liao, F. Xiao, B. Wu, K. Bi, B. He and Y. Jia, *Int J Biol Macromol* **2020**, *144*, 427-440.
172. T. Yan, N. Wang, B. Liu, B. Wu, F. Xiao, B. He and Y. Jia, *Phytother Res* **2021**, *35*, 289-296.
173. C. Yang, Y. Fujita, Q. Ren, M. Ma, C. Dong and K. Hashimoto, *Sci Rep* **2017a**, *7*, 45942.
174. C. Yang, Y. Qu, Y. Fujita, Q. Ren, M. Ma, C. Dong and K. Hashimoto, *Transl Psychiatry* **2017**, *7*, 1294.
175. C. Yang, X. Fang, G. Zhan, N. Huang, S. Li, J. Bi, R. Jiang, L. Yang, L. Miao, B. Zhu, A. Luo and K. Hashimoto, *Transl Psychiatry* **2019**, *9*, 57.
176. H.-L. Yang, M.-M. Li, M.-F. Zhou, H.-S. Xu, F. Huan, N. Liu, R. Gao, J. Wang, N. Zhang and L. Jiang, *Inflammation* **2021**, *44*, 2448-2462.
177. J. Yang, G. Zhou, Z. Ou, N. Jia and D. Wang, *Comput Math Methods Med* **2021**, *2021*, 3567447.
178. Q. Yang, L. Luo, T. Sun, L. Yang, L.-F. Cheng, Y. Wang, Q.-Q. Liu, A. Liu, H.-Y. Liu, M.-G. Zhao, S.-X. Wu and B. Feng, *Psychopharmacology (Berl)* **2020**, *237*, 3201-3213.
179. Y. Yang, S. Zhao, X. Yang, W. Li, J. Si and X. Yang, *Neurosci Lett* **2022**, *774*, 136474.
180. J.-B. Yu, Z.-X. Zhao, R. Peng, L.-B. Pan, J. Fu, S.-R. Ma, P. Han, L. Cong, Z.-W. Zhang, L.-X. Sun, J.-D. Jiang and Y. Wang, *Front Pharmacol* **2019**, *10*, 268.
181. M. Yu, H. Jia, C. Zhou, Y. Yang, Y. Zhao, M. Yang and Z. Zou, *J Pharm Biomed Anal* **2017**, *138*, 231-239.
182. M. Yu, H.-M. Jia, T. Zhang, H. Shang, H.-W. Zhang, L.-Y. Ma and Z.-M. Zou, *Metabolites* **2020**, *10*,
183. M. Yu, H.-M. Jia, L.-L. Qin and Z.-M. Zou, *J Affect Disord* **2021**, *297*,
184. S.-W. Yun, J.-K. Kim, K.-E. Lee, Y. J. Oh, H.-J. Choi, M. J. Han and D.-H. Kim, *Nutrients* **2020**, *12*,
185. S. W. Yun, J. K. Kim, M. J. Han and D. H. Kim, *Benef Microbes* **2021**, *12*, 541-551.
186. F. Zhang, H. Chen, R. Zhang, Y. Liu, N. Kong, Y. Guo and M. Xu, *Biochim Biophys Acta Mol Basis Dis* **2020**, *1866*, 165884.
187. J. Zhang, L. Ma, L. Chang, Y. Pu, Y. Qu and K. Hashimoto, *Transl Psychiatry* **2020**, *10*, 186.
188. J. C. Zhang, W. Yao, C. Dong, C. Yang, Q. Ren, M. Ma and K. Hashimoto, *Transl Psychiatry* **2017**, *7*, e1138.

189. K. Zhang, Y. Fujita, L. Chang, Y. Qu, Y. Pu, S. Wang, Y. Shirayama and K. Hashimoto, *Transl Psychiatry* **2019**, *9*, 231.
190. L. Zhang, L. Wang, L. Huang, Y. Zhao, H. Ding, B. Li, L. Wen, W. Xiong, Y. Liu, T. Zhang, L. Zhang, L. Wu, Q. Xu, Y. Fan, G. Wei, Q. Yin, Y. Chen, T. Zhang and Z. Yan, *Pharm Biol* **2021**, *59*, 912-921.
191. M. Zhang, A. Li, Q. Yang, J. Li, L. Wang, X. Liu, Y. Huang and L. Liu, *Front Cell Infect Microbiol* **2021**, *11*, 665159.
192. W. Zhang, W. Qu, H. Wang and H. Yan, *Transl Psychiatry* **2021**, *11*, 131.
193. Y. Zhang, J. Huang, Y. Xiong, X. Zhang, Y. Lin and Z. Liu, *Nutrients* **2021**, *14*,
194. Y. Zhang, R. Huang, M. Cheng, L. Wang, J. Chao, J. Li, P. Zheng, P. Xie, Z. Zhang and H. Yao, *Microbiome* **2019**, *7*, 116.
195. Z. Zhang, N. Li, R. Chen, T. Lee, Y. Gao, Z. Yuan, Y. Nie and T. Sun, *Neurobiol Stress* **2021**, *15*, 100333.
196. Z. Zhang, S. Shao, Y. Zhang, R. Jia, X. Hu, H. Liu, M. Sun, B. Zhang, Q. Li and Y. Wang, *Biomed Pharmacother* **2020**, *132*, 110916.
197. Z. Zhang, C. Yao, M. Li, L.-C. Wang, W. Huang and Q.-J. Chen, *Lett Appl Microbiol* **2022**,
198. B. Zhao, J. Wu, J. Li, Y. Bai, Y. Luo, B. Ji, B. Xia, Z. Liu, X. Tan, J. Lv and X. Liu, *J Agric Food Chem* **2020**, *68*, 3963-3975.
199. F. Zhao, S. Guan, Y. Fu, K. Wang, Z. Liu and T. B. Ng, *Biomed Pharmacother* **2021**, *143*, 112087.
200. W. Zhao, Y. Hu, C. Li, N. Li, S. Zhu, X. Tan, M. Li, Y. Zhang, Z. Xu, Z. Ding, L. Hu, Z. Liu and J. Sun, *Biofactors* **2019**, *46*, 38-54.
201. Z. Zhao, B. Wang, L. Mu, H. Wang, J. Luo, Y. Yang, H. Yang, M. Li, L. Zhou and C. Tao, *Front Cell Infect Microbiol* **2020**, *10*, 258.
202. P. Zheng, B. Zeng, C. Zhou, M. Liu, Z. Fang, X. Xu, L. Zeng, J. Chen, S. Fan, X. Du, X. Zhang, D. Yang, Y. Yang, H. Meng, W. Li, N. D. Melgiri, J. Licinio, H. Wei and P. Xie, *Mol Psychiatry* **2016**, *21*, 786-796.
203. P. Zheng, J. Wu, H. Zhang, S. W. Perry, B. Yin, X. Tan, T. Chai, W. Liang, Y. Huang, Y. Li, J. Duan, M.-L. Wong, J. Licinio and P. Xie, *Mol Psychiatry* **2020**, *26*, 2380-2392.
204. H. Zhou, S. Zhang, X. Zhang, H. Zhou, T. Wen and J. Wang, *Biochem Biophys Res Commun* **2022**, *593*, 137-143.
205. H.-Z. Zhu, Y.-D. Liang, Q.-Y. Ma, W.-Z. Hao, X.-J. Li, M.-S. Wu, L.-J. Deng, Y.-M. Li and J.-X. Chen, *Biomed Pharmacother* **2019**, *112*, 108621.
206. J.-P. Zhu, H.-Y. Wu, Y. Zi, X.-B. Xia, M.-Z. Xie and Z.-Y. Yuan, *Evid Based Complement Alternat Med* **2021**, *2021*, 5554363.

**Table S3.** Microbiota  $\beta$ -diversity in patients with depression.

| Study                         | Metric                                                | Analysis                | Significance                                                |
|-------------------------------|-------------------------------------------------------|-------------------------|-------------------------------------------------------------|
| Bai S et al. 2021             | –                                                     | PCoA                    | Sig. difference                                             |
| Bai S et al. 2022             | –                                                     | OPLS-DA                 | Sig. difference                                             |
| Caso JR et al. 2021           | Bray–Curtis<br>Jaccard                                | PCoA, PERMANOVA         | No sig. difference<br>No sig. difference                    |
| Chahwan B et al. 2019         | Weighted Unifrac                                      | PCoA, PERMANOVA         | No sig. difference                                          |
| Chen JJ et al. 2018           | UniFrac                                               | PCoA, PLS-DA            | Sig. difference                                             |
| Chen JJ et al. 2020           | –                                                     | OPLS-DA                 | Sig. difference                                             |
| Chen T et al. 2021            | Unweighted UniFrac                                    | PCoA, ANOSIM            | Sig. difference                                             |
| Chen YH et al. 2021           | Weighted Unifrac<br>Unweighted UniFrac                | PCoA                    | Sig. difference<br>Sig. difference                          |
| Chung YE et al. 2019          | Weighted Unifrac<br>Unweighted UniFrac                | PERMANOVA               | Sig. difference<br>Sig. difference                          |
| Ciocan D et al. 2021          | Weighted Unifrac<br>Unweighted UniFrac                | ANOSIM                  | No sig. difference<br>Sig. difference                       |
| Dong Z et al. 2021            | Bray–Curtis                                           | PCA                     | No sig. difference                                          |
| Huang Y et al. 2018           | Weighted Unifrac<br>Unweighted UniFrac                | PCoA                    | Sig. difference<br>No sig. difference                       |
| Huang Y et al. 2021           | Bray–Curtis                                           | PLS-DA, PCA, PCoA, NMDS | Sig. difference                                             |
| Jiang H et al. 2015           | Unweighted UniFrac                                    | PCoA                    | No sig. difference                                          |
| Jiang HY et al. 2020          | Bray–Curtis<br>Weighted Unifrac<br>Unweighted UniFrac | PCoA                    | Sig. difference<br>No sig. difference<br>No sig. difference |
| Kelly JR et al. 2016          | Bray–Curtis<br>Weighted Unifrac<br>Unweighted UniFrac | PCoA, Adonis PERMANOVA  | Sig. difference<br>Sig. difference<br>Sig. difference       |
| Kleiman SC et al. 2015        | Weighted Unifrac<br>Unweighted UniFrac                | –                       | No sig. difference<br>Sig. difference                       |
| Kurokawa S et al. 2018        | Weighted UniFrac<br>Unweighted UniFrac                | PCoA                    | No sig. difference<br>Sig. difference                       |
| Lai WT et al. 2021            | Bray–Curtis                                           | PCoA, PERMANOVA         | Sig. difference                                             |
| Lin P et al. 2017             | Weighted Unifrac                                      | PCoA                    | Sig. difference                                             |
| Ling Y et al. 2020            | Bray–Curtis                                           | PCoA, ANOSIM            | No sig. difference                                          |
| Liśkiewicz P et al. 2021      | Bray–Curtis<br>Unweighted UniFrac                     | PCoA, PERMANOVA         | –<br>No sig. difference                                     |
| Liu P et al. 2021             | Jaccard                                               | PCoA                    | Sig. difference                                             |
| Liu RT et al. 2020            | Bray–Curtis<br>Weighted Unifrac<br>Unweighted UniFrac | PCoA, Adonis            | Sig. difference<br>Sig. difference<br>Sig. difference       |
| Liu T et al. 2020             | Bray–Curtis                                           | PCoA, ANOSIM            | No sig. difference                                          |
| Liu Y et al. 2016             | –                                                     | PCA                     | Sig. difference                                             |
| Madan A et al. 2020           | Jaccard similarity index                              | –                       | Sig. difference                                             |
| Mason BL et al. 2020          | Weighted UniFrac                                      | PERMANOVA               | No sig. difference                                          |
| Minichino A et al. 2021       | Weighted Unifrac<br>Unweighted UniFrac                | PCoA                    | Sig. difference<br>Sig. difference                          |
| Naseribafrouei A et al. 2014  | –                                                     | PLS-DA                  | Sig. difference                                             |
| P érez-Santiago J et al. 2021 | Weighted Unifrac<br>Unweighted UniFrac                | PCoA, PERMANOVA         | Sig. difference<br>Sig. difference                          |
| Qin Q et al. 2021             | –                                                     | PCA, NMDS               | No sig. difference                                          |

|                         |                                                                  |                              |                                                                                   |
|-------------------------|------------------------------------------------------------------|------------------------------|-----------------------------------------------------------------------------------|
| Rhee SJ et al. 2020     | Bray-Curtis<br>Weighted Unifrac<br>Unweighted UniFrac            | PCoA, PERMANOVA              | Sig. difference<br>No sig. difference<br>Sig. difference                          |
| Rhee SJ et al. 2021     | Bray-Curtis<br>Weighted Unifrac<br>Unweighted UniFrac            | PERMANOVA                    | No sig. difference<br>Sig. difference<br>No sig. difference                       |
| Shen Y et al. 2021      | Binary jaccard algorithm                                         | PCoA                         | Sig. difference                                                                   |
| Simpson CA et al. 2020  | Weighted Unifrac<br>Unweighted UniFrac                           | PCoA, PERMANOVA              | No sig. difference<br>No sig. difference                                          |
| Stevens BR et al. 2020  | Bray-Curtis (unfiltered data)<br>Bray-Curtis (filtered data)     | PERMANOVA                    | No sig. difference<br>Sig. difference                                             |
| Stevens BR et al. 2021  | Bray-Curtis                                                      | PCoA                         | Sig. difference                                                                   |
| Taylor AM et al. 2020   | Weighted UniFrac                                                 | –                            | –                                                                                 |
| Taylor BC et al. 2020   | Unweighted Unifrac                                               | PERMANOVA                    | Sig. difference                                                                   |
| Wingfield B et al. 2021 | Bray-Curtis                                                      | –                            | Sig. difference                                                                   |
| Yang J et al. 2020      | Bray-Curtis                                                      | PCoA, PERMANOVA              | Sig. difference                                                                   |
| Yang Y et al. 2021      | Bray-Curtis<br>Weighted Unifrac<br>Unweighted UniFrac            | PCoA, NMDS, ADONIS           | Sig. difference<br>Sig. difference<br>Sig. difference                             |
| Ye X et al. 2021        | Unweighted UniFrac                                               | PCoA                         | Sig. difference                                                                   |
| Zhang Q et al. 2021     | Bray-Curtis<br>Jaccard<br>Weighted Unifrac<br>Unweighted UniFrac | PCoA, ANOSIM                 | Sig. difference<br>Sig. difference<br>Sig. difference<br>Sig. difference          |
| Zhao H et al. 2021      | –                                                                | PCA                          | Sig. difference                                                                   |
| Zheng P et al. 2016     | Bray-Curtis<br>Unweighted UniFrac                                | PCoA                         | Sig. difference                                                                   |
| Zheng P et al. 2020     | –                                                                | PLS-DA, PERMANOVA            | Sig. difference                                                                   |
| Zhou Y et al. 2020      | Weighted UniFrac                                                 | PCoA, Wilcoxon rank-sum test | Sig. difference                                                                   |
| Zhu J et al. 2021       | Bary-Curtis<br>Jaccard<br>Weighted Unifrac<br>Unweighted UniFrac | PCoA, PERMANOVA              | No sig. difference<br>Sig. difference<br>No sig. difference<br>No sig. difference |

**Table S4.** Microbial  $\beta$ -diversity in animal models of depression.

| Study                      | Metric                                                | Analysis               | Significance                                          |
|----------------------------|-------------------------------------------------------|------------------------|-------------------------------------------------------|
| Abildgaard A et al. 2021   | Bray-Curtis<br>Jaccard                                | PCoA, PERMANOVA        | Sig. difference<br>Sig. difference                    |
| An Q et al. 2020           | Unweighted UniFrac                                    | PCA, ANOSIM            | Sig. difference                                       |
| Arslanova A et al. 2021    | Weighted Unifrac<br>Unweighted UniFrac                | PCoA                   | –                                                     |
| Bharwani A et al. 2017     | Bray-Curtis                                           | PCoA                   | Sig. difference                                       |
| Bridgewater LC et al. 2017 | Bray-Curtis                                           | PCoA                   | Sig. difference                                       |
| Burokas A et al. 2017      | Unweighted UniFrac                                    | PCoA                   | Sig. difference                                       |
| Chakraborti A et al. 2021  | Weighted Unifrac<br>Unweighted UniFrac<br>Bray-Curtis | PCoA, PERMANOVA        | Sig. difference<br>Sig. difference<br>Sig. difference |
| Chen L et al. 2021         | –                                                     | PCA                    | Sig. difference                                       |
| Chen P et al. 2019         | Bray-Curtis<br>Jaccard                                | PCoA, NMDS             | Sig. difference<br>Sig. difference                    |
| Chen T et al. 2021         | Unweighted UniFrac                                    | PCoA, ANOSIM           | Sig. difference                                       |
| Chen X et al. 2021         | Weighted UniFrac                                      | PCA                    | Sig. difference                                       |
| Chen X et al. 2022         | Weighted Unifrac                                      | PCoA                   | Sig. difference                                       |
| Chen Y et al. 2021b        | Weighted Unifrac<br>Bray-Curtis                       | PCoA, PERMANOVA        | Sig. difference<br>Sig. difference                    |
| Cheng D et al. 2018        | Morisita-Horn dissimilarity                           | PCA                    | Sig. difference                                       |
| Cheng R et al. 2021        | UniFrac                                               | PCoA                   | Sig. difference                                       |
| Chevalier G et al. 2020    | Bray-Curtis                                           | PCoA                   | –                                                     |
| Chi L et al. 2020          | –                                                     | PLS-DA                 | Sig. difference                                       |
| Daug V et al. 2020         | Bray-Curtis                                           | MDS                    | Sig. difference                                       |
| Deng Y et al. 2021         | –                                                     | PCoA                   | Sig. difference                                       |
| Ding Y et al. 2021         | –                                                     | PCA, ANOSIM            | Sig. difference                                       |
| Diviccaro S et al. 2019    | Weighted Unifrac<br>Unweighted UniFrac<br>Bray-Curtis | PCoA, PEMANOVA         | Sig. difference<br>Sig. difference<br>Not mention     |
| Donoso F et al. 2020       | Aitchison                                             | PCA, PERMANOVA         | Sig. difference                                       |
| Du HX et al. 2020          | Bray-Curtis                                           | NMDS                   | Sig. difference                                       |
| Duan J et al. 2021         | Unweighted UniFrac                                    | PCoA, PLS-DA, ANOSIM   | Sig. difference                                       |
| Egerton S et al. 2020      | Bray-Curtis                                           | PCoA, Adonis PERMANOVA | Sig. difference                                       |
| El Aidy S et al. 2017      | Weighted UniFrac                                      | PCoA, PEMANOVA         | Sig. difference                                       |
| Fan L et al. 2021          | –                                                     | PCoA                   | Sig. difference                                       |
| Feng Y et al. 2020         | –                                                     | PLS-DA                 | Sig. difference                                       |
| Feng Z et al. 2020         | UniFrac                                               | PCA, NMDS              | Sig. difference                                       |
| Forouzan S et al. 2021     | Weighted UniFrac                                      | PCoA                   | Sig. difference                                       |
| Gao K et al. 2022          | Bray-Curtis                                           | PCoA, PERMANOVA        | Sig. difference                                       |
| Gao X et al. 2020          | –                                                     | PLS-DA                 | Sig. difference                                       |
| Gong X et al. 2021         | Weighted UniFrac                                      | PCoA                   | Sig. difference                                       |
| Gu F et al. 2020           | Weighted UniFrac                                      | PCoA                   | Sig. difference                                       |
| Gu X et al. 2022           | Weighted UniFrac                                      | PLS-DA, ANOSIM         | Sig. difference                                       |
| Guida F et al. 2018        | Bray-Curtis<br>Jaccard                                | PEMANOVA               | Sig. difference<br>Sig. difference                    |
| Guo Y et al. 2018          | –                                                     | NMDS                   | Sig. difference                                       |
| Guo Y et al. 2019          | –                                                     | PCA, Adonis            | No sig. difference                                    |
| Han SK et al. 2020a        | Jensen-Shannon                                        | PCoA                   | Sig. difference                                       |

|                        |                                                       |                                       |                                                          |
|------------------------|-------------------------------------------------------|---------------------------------------|----------------------------------------------------------|
| Han SK et al. 2020b    | Jensen-Shannon                                        | PCoA                                  | Sig. difference                                          |
| Han SK et al. 2021     | Weighted UniFrac                                      | PCoA                                  | Sig. difference                                          |
| Hao W et al. 2021      | –                                                     | PCA                                   | Sig. difference                                          |
| Hao WZ et al. 2021     | Weighted Unifrac<br>Unweighted UniFrac<br>Bray-Curtis | PCoA                                  | Sig. difference<br>Sig. difference<br>Sig. difference    |
| Hassan AM et al. 2019  | Weighted UniFrac                                      | PCoA, Adonis                          | Sig. difference                                          |
| Huang F et al. 2021    | UniFrac                                               | PCA                                   | Sig. difference                                          |
| Huang N et al. 2019    | Euclidean<br>Bray-Curtis                              | PCoA                                  | Sig. difference<br>Sig. difference                       |
| Huang YJ et al. 2021   | Bray-Curtis                                           | PCoA                                  | Sig. difference                                          |
| Huang YY et al. 2022   | Bray-Curtis                                           | PcoA                                  | Sig. difference                                          |
| Inserra A et al. 2019  | Weighted UniFrac                                      | PERMANOVA                             | Sig. difference                                          |
| Ji S et al. 2022       | Weighted Unifrac<br>Unweighted UniFrac<br>Bray-Curtis | PCoA, PERMANOVA                       | No sig. difference<br>Sig. difference<br>Sig. difference |
| Jiang W et al. 2021    | –                                                     | PCoA, Adonis                          | Sig. difference                                          |
| Jiang Y et al. 2020    | Unweighted UniFrac                                    | PCoA, ANOSIM                          | Sig. difference                                          |
| Jianguo L et al. 2019  | Bray-Curtis                                           | PERMANOVA                             | Sig. difference                                          |
| Kamimura Y et al. 2021 | Weighted UniFrac                                      | PCoA                                  | Sig. difference                                          |
| Kemp KM et al. 2021    | Aitchison                                             | PCA, Adonis PERMANOVA                 | Sig. difference                                          |
| Kim JK et al. 2020     | Weighted Unifrac                                      | PcoA                                  | Sig. difference                                          |
| Kim JK et al. 2021     | Generalized UniFrac                                   | PCoA                                  | Sig. difference                                          |
| Knudsen JK et al. 2021 | –                                                     | PCA                                   | Sig. difference                                          |
| Kosuge A et al. 2021   | Bray-Curtis<br>Jaccard                                | PCoA, Adonis PERMANOVA                | Sig. difference<br>Sig. difference                       |
| Lai WD et al. 2022     | –                                                     | PCA, PcoA, NMDS                       | Sig. difference                                          |
| Leclercq S et al. 2020 | Bray-Curtis<br>Unweighted UniFrac                     | PCoA                                  | Sig. difference<br>Sig. difference                       |
| Lee HC et al. 2020     | Weighted Unifrac<br>Unweighted UniFrac                | PCoA                                  | Sig. difference<br>Sig. difference                       |
| Li H et al. 2021       | Bray-Curtis                                           | PCoA                                  | Sig. difference                                          |
| Li N et al. 2018       | Weighted Unifrac<br>Unweighted UniFrac                | PCoA, ANOSIM                          | Sig. difference<br>Sig. difference                       |
| Li N et al. 2019       | Weighted Unifrac<br>Unweighted UniFrac                | PCoA                                  | Sig. difference<br>Sig. difference                       |
| Li P et al. 2021       | Unweighted UniFrac                                    | PCoA                                  | Sig. difference                                          |
| Li Y et al. 2018       | Weighted Unifrac                                      | PCoA                                  | Sig. difference                                          |
| Lim EY et al. 2021     | Weighted Unifrac                                      | PCoA                                  | Sig. difference                                          |
| Lin S et al. 2021      | –                                                     | PCA, NMDS                             | Sig. difference                                          |
| Liu QF et al. 2020     | Unweighted UniFrac                                    | PCoA                                  | Sig. difference                                          |
| Liu X et al. 2021a     | Bray-Curtis                                           | PCoA, PLS-DA                          | Sig. difference                                          |
| Liu X et al. 2021b     | Bray-Curtis                                           | PCoA, NMDS, Adonis, Permdisp          | Sig. difference                                          |
| Liu Z et al. 2020      | Unweighted UniFrac                                    | PCoA                                  | Sig. difference                                          |
| Luo X et al. 2021      | Bray-Curtis                                           | NMDS, ANOSIM                          | Sig. difference                                          |
| Lv M et al. 2021       | Weighted Unifrac                                      | PCoA, NMDS                            | Sig. difference                                          |
| Lv WJ et al. 2019      | Weighted Unifrac                                      | PCA, PCoA, PLS-DA                     | Sig. difference                                          |
| Lv WJ et al. 2020      | Unweighted UniFrac                                    | PCA, PCoA, NMDS,<br>PERMANOVA, ANOSIM | Sig. difference                                          |
| Ma W et al. 2019       | Bray-Curtis                                           | PCA                                   | Sig. difference                                          |

|                             |                                                       |                             |                                                       |
|-----------------------------|-------------------------------------------------------|-----------------------------|-------------------------------------------------------|
| Matsuda Y et al. 2020       | Bray-Curtis                                           | PcoA                        | Sig. difference                                       |
| McGaughey KD et al. 2019    | Unweighted UniFrac                                    | PCoA, ANOSIM                | Sig. difference                                       |
| Meng C et al. 2022          | –                                                     | CPCoA, PcoA                 | Sig. difference                                       |
| Moya-Pérez A et al. 2017    | Bray-Curtis                                           | PCoA, Permanova             | Sig. difference                                       |
| O'Mahony SM et al. 2020     | Bray-Curtis                                           | PCoA, Adonis                | Sig. difference                                       |
| Partrick KA et al. 2021     | Unweighted UniFrac                                    | PCoA, PERMANOVA             | Sig. difference                                       |
| Patterson E et al. 2019     | Bray-Curtis                                           | PCoA                        | Sig. difference                                       |
| Pearson-Leary J et al. 2020 | Bray-Curtis<br>Weighted UniFrac                       | PCoA                        | Sig. difference<br>Sig. difference                    |
| Pu Y et al. 2021            | –                                                     | PCA, ANOSIM                 | No sig. difference                                    |
| Pusceddu MM et al. 2015     | –                                                     | RDA                         | Sig. difference                                       |
| Qiao Y et al. 2020          | Bray-Curtis<br>Weighted Unifrac<br>Unweighted UniFrac | PCoA                        | Sig. difference<br>Sig. difference<br>Sig. difference |
| Qu W et al. 2019            | Bray-Curtis                                           | PCoA                        | Sig. difference                                       |
| Qu Y et al. 2017            | Bray-Curtis                                           | PCoA                        | Sig. difference                                       |
| Qu Y et al. 2020            | Weighted Unifrac                                      | PCoA                        | Sig. difference                                       |
| Rao J et al. 2021           | Bray-Curtis<br>Jaccard                                | PCoA                        | Sig. difference                                       |
| Robertson RC et al. 2017    | Unweighted UniFrac                                    | PCoA                        | Sig. difference                                       |
| Schmidtner AK et al. 2019   | Bray-Curtis                                           | PCoA                        | Sig. difference                                       |
| Shan B et al. 2021          | Bray-Curtis                                           | PCoA                        | Sig. difference                                       |
| Shao S et al. 2021          | –                                                     | PCoA                        | No sig. difference                                    |
| Sheng L et al. 2021         | Unweighted UniFrac                                    | PCoA                        | Sig. difference                                       |
| Siopi E et al. 2020         | Bray-Curtis                                           | PCoA                        | Sig. difference                                       |
| Song J et al. 2019a         | –                                                     | PLS-DA                      | Sig. difference                                       |
| Song J et al. 2019b         | –                                                     | PLS-DA                      | Sig. difference                                       |
| Song X et al. 2021          | Bray-Curtis<br>Unweighted UniFrac                     | PLS-DA, ANOSIM              | Sig. difference<br>Sig. difference                    |
| Sovijit WN et al. 2019      | Bray-Curtis                                           | PCoA, PERMANOVA             | Sig. difference                                       |
| Sun L et al. 2019a          | Bray-Curtis                                           | PCoA                        | Sig. difference                                       |
| Sun L et al. 2019b          | Unweighted UniFrac                                    | PCoA                        | Sig. difference                                       |
| Sun Y et al. 2019           | Unweighted UniFrac                                    | PCA, PCoA                   | Sig. difference                                       |
| Sun Y et al. 2020           | Weighted Unifrac                                      | PCoA                        | Sig. difference                                       |
| Suzuki K et al. 2021        | Unweighted UniFrac                                    | PCoA, PERMANOVA             | Sig. difference                                       |
| Szyszkowicz JK et al. 2017  | –                                                     | PCA                         | Sig. difference                                       |
| Teng T et al. 2021          | Bray-Curtis                                           | PCoA, PLS-DA, sparse PLS-DA | Sig. difference                                       |
| Tian P et al. 2019a         | –                                                     | PCoA                        | Sig. difference                                       |
| Tian P et al. 2019b         | –                                                     | PCA                         | Sig. difference                                       |
| Tian P et al. 2020          | Unweighted UniFrac                                    | PCA, PCoA, PERMANOVA        | Sig. difference                                       |
| Tian P et al. 2021          | Aitchison                                             | PCA, PERMANOVA              | Sig. difference                                       |
| Tian XY et al. 2021         | –                                                     | PCA, PCoA, ANOSIM, Adonis   | Sig. difference                                       |
| Tillmann S et al. 2019      | –                                                     | PCA, PLS-DA                 | Sig. difference                                       |
| Tung TH et al. 2019         | Bray-Curtis                                           | NMDS                        | Sig. difference                                       |
| Wang L et al. 2020          | Unweighted UniFrac                                    | PCoA                        | Sig. difference                                       |
| Wang L et al. 2021          | –                                                     | PCoA                        | Sig. difference                                       |
| Wang Q et al. 2019          | Unweighted UniFrac                                    | PCoA, PERMANOVA             | Sig. difference                                       |
| Wang R et al. 2021          | Bray-Curtis                                           | PCoA                        | Sig. difference                                       |

|                        |                                                       |                            |                                    |
|------------------------|-------------------------------------------------------|----------------------------|------------------------------------|
| Wang S et al. 2020a    | Unweighted UniFrac                                    | PCoA                       | Sig. difference                    |
| Wang S et al. 2020b    | Unweighted UniFrac                                    | PCoA                       | Sig. difference                    |
| Wang S et al. 2021     | –                                                     | PCA, ANOSIM                | Sig. difference                    |
| Wang Y et al. 2021     | Weighted Unifrac<br>Jaccard                           | PCoA                       | Sig. difference<br>Sig. difference |
| Warda AK et al. 2019   | Bray-Curtis                                           | PCoA, PERMANOVA            | Sig. difference                    |
| Wei LN et al. 2019     | Bray-Curtis                                           | PCoA, NMDS                 | Sig. difference                    |
| Westfall S et al. 2021 | Weighted Unifrac                                      | PCoA, PERMANOVA            | Sig. difference                    |
| Wong ML et al. 2016    | Bray-Curtis                                           | PERMANOVA                  | Sig. difference                    |
| Wu F et al. 2020       | Unweighted UniFrac                                    | PcoA                       | Sig. difference                    |
| Wu J et al. 2021       | Unweighted UniFrac                                    | PCoA                       | Sig. difference                    |
| Wu M et al. 2020       | –                                                     | PCoA                       | Sig. difference                    |
| Xia J et al. 2021      | Weighted Unifrac<br>Unweighted UniFrac                | PCoA, OPLS-DA              | Sig. difference<br>Sig. difference |
| Xiao Q et al. 2020     | Unweighted UniFrac                                    | PCoA, NMDS                 | Sig. difference                    |
| Xie R et al. 2020a     | Weighted Unifrac<br>Unweighted UniFrac                | PCoA                       | Sig. difference<br>Sig. difference |
| Xie R et al. 2020b     | –                                                     | PCA                        | Sig. difference                    |
| Xie Y et al. 2021      | Bray-Curtis                                           | PCoA                       | Sig. difference                    |
| Xu M et al. 2022       | –                                                     | PCoA                       | Sig. difference                    |
| Xu Z et al. 2019       | Bray-Curtis<br>Unweighted UniFrac                     | PCoA                       | Sig. difference<br>Sig. difference |
| Xue M et al. 2021      | Unweighted UniFrac                                    | PCoA, Adonis               | Sig. difference                    |
| Yang C et al. 2017b    | Bray-Curtis<br>Euclidean                              | PCoA                       | Not mention<br>Not mention         |
| Yang C et al. 2019     | –                                                     | PCoA                       | Sig. difference                    |
| Yang HL et al. 2021    | Unweighted UniFrac                                    | PCoA                       | No sig. difference                 |
| Yang Q et al. 2020     | Bray-Curtis<br>Weighted Unifrac<br>Unweighted UniFrac | PCoA                       | Not mention                        |
| Yu M et al. 2017       | Bray-Curtis                                           | PCoA                       | Sig. difference                    |
| Yu M et al. 2020       | –                                                     | PCoA                       | Sig. difference                    |
| Yu M et al. 2021       | Bray-Curtis                                           | PCoA                       | Sig. difference                    |
| Yun SW et al. 2020     | Jansen-Shannon                                        | PCoA                       | Sig. difference                    |
| Yun SW et al. 2021     | Bray-Curtis                                           | PCoA                       | Sig. difference                    |
| Zhang F et al. 2020    | –                                                     | PCoA                       | Sig. difference                    |
| Zhang J et al. 2020    | Bray-Curtis                                           | PCoA                       | Sig. difference                    |
| Zhang K et al. 2019    | –                                                     | PCoA                       | Sig. difference                    |
| Zhang L et al. 2021    | Bray-Curtis                                           | PCoA, NMDS                 | Sig. difference                    |
| Zhang M et al. 2021    | Bray-Curtis                                           | PCoA, PERMANOVA,<br>ANOSIM | Sig. difference                    |
| Zhang W et al. 2021    | Weighted Unifrac<br>Unweighted UniFrac                | PCoA                       | Sig. difference<br>Sig. difference |
| Zhang Y et al. 2019    | Unweighted UniFrac                                    | PCoA                       | Sig. difference                    |
| Zhang Y et al. 2021    | Bray-Curtis                                           | PLS-DA                     | Sig. difference                    |
| Zhang Z et al. 2020    | –                                                     | PLS-DA                     | No sig. difference                 |
| Zhang Z et al. 2021    | Unweighted UniFrac                                    | PCoA, NMDS, ANOSIM         | Sig. difference                    |
| Zhang Z et al. 2022    | Unweighted UniFrac                                    | PCoA, PERMANOVA,<br>ANOSIM | No sig. difference                 |
| Zhao B et al. 2020     | Weighted Unifrac<br>Unweighted UniFrac                | PCoA                       | Sig. difference<br>Sig. difference |



|                     |                                        |                 |                                    |
|---------------------|----------------------------------------|-----------------|------------------------------------|
| Zhao F et al. 2021  | Bray-Curtis                            | PCoA            | Not mention                        |
| Zhao Z et al. 2020  | Weighted Unifrac                       | PCA, PCoA, MDS  | Sig. difference                    |
| Zheng P et al. 2016 | Weighted Unifrac<br>Unweighted UniFrac | PCoA            | Sig. difference<br>Sig. difference |
| Zheng P et al. 2020 | –                                      | PLS-DA          | Sig. difference                    |
| Zhou H et al. 2022  | –                                      | PCoA            | Sig. difference                    |
| Zhu HZ et al. 2019  | Weighted Unifrac<br>Unweighted UniFrac | PCA, PCoA, NMDS | Sig. difference<br>Sig. difference |



|                     |                    |                    |                    |                    |                |    |    |    |   |   |   |   |    |   |   |    |   |   |   |   |   |   |
|---------------------|--------------------|--------------------|--------------------|--------------------|----------------|----|----|----|---|---|---|---|----|---|---|----|---|---|---|---|---|---|
| Actinobacteria      | Actinobacteria     | Actinomycetales    | Actinomycetaceae   | 7                  | 6              | 1  | 5  | 5  | 0 |   |   |   | 4  | 4 | 0 | 4  | 4 | 0 |   |   |   |   |
|                     |                    | Bifidobacteriales  | Bifidobacteriaceae | 8                  | 6              | 2  | 8  | 6  | 2 |   |   |   |    | 7 | 6 | 1  | 7 | 6 | 1 |   |   |   |
|                     |                    | Corynebacteriales  | Corynebacteriaceae | 2                  | 1              | 1  | 2  | 1  | 1 |   |   |   |    | 2 | 1 | 1  | 2 | 1 | 1 |   |   |   |
|                     |                    | Micrococcales      | Micrococcaceae     | 3                  | 1              | 2  | 2  | 1  | 1 |   |   |   |    | 2 | 1 | 1  | 2 | 1 | 1 |   |   |   |
| Bacteroidetes       | Coriobacteria      | Coriobacteriales   | Coriobacteriaceae  | 9                  | 5              | 4  | 9  | 5  | 4 | 2 | 1 | 1 | 6  | 4 | 2 | 7  | 4 | 3 | 2 | 1 | 1 |   |
|                     | Bacteroidia        | Bacteroidales      | Bacteroidaceae     | 10                 | 4              | 6  | 9  | 4  | 5 |   |   |   | 9  | 4 | 5 | 9  | 4 | 5 |   |   |   |   |
|                     |                    |                    | Barnesiellaceae    | 3                  | 1              | 2  | 3  | 1  | 2 |   |   |   |    | 2 | 1 | 1  | 3 | 1 | 2 |   |   |   |
|                     |                    |                    | Porphyromonadaceae | 5                  | 5              | 0  | 5  | 5  | 0 |   |   |   |    | 5 | 5 | 0  | 5 | 5 | 0 |   |   |   |
|                     |                    |                    | Prevotellaceae     | 9                  | 0              | 9  | 9  | 0  | 9 |   |   |   |    | 8 | 0 | 8  | 8 | 0 | 8 |   |   |   |
|                     |                    |                    | Rikenellaceae      | 10                 | 6              | 4  | 10 | 6  | 4 | 3 | 0 | 3 |    | 7 | 6 | 1  | 7 | 5 | 2 | 3 | 1 | 2 |
|                     |                    |                    | Tannerellaceae     | 3                  | 3              | 0  | 3  | 3  | 0 |   |   |   |    | 3 | 3 | 0  | 3 | 3 | 0 |   |   |   |
|                     |                    |                    | Marinilabiales     | Marinilabillaceae  | 2              | 1  | 1  | 2  | 1 | 1 |   |   |    |   |   |    |   | 2 | 1 | 1 |   |   |
|                     | Chitinophagia      | Chitinophagales    | Chitinophagaceae   | 2                  | 0              | 2  | 2  | 0  | 2 |   |   |   | 2  | 0 | 2 | 2  | 0 | 2 |   |   |   |   |
|                     | Flavobacteria      | Flavobacteriales   | Flavobacteriaceae  | 3                  | 1              | 2  | 2  | 1  | 1 |   |   |   |    |   |   | 2  | 1 | 1 |   |   |   |   |
|                     |                    |                    | Fusobacteriaceae   | 3                  | 2              | 1  | 2  | 2  | 0 |   |   |   |    | 2 | 2 | 0  | 2 | 2 | 0 |   |   |   |
|                     | Firmicutes         | Bacilli            | Lactobacillales    | Camobacteriaceae   | 2              | 1  | 1  | 2  | 1 | 1 |   |   |    | 2 | 1 | 1  |   |   |   |   |   |   |
| Enterococcaceae     |                    |                    |                    | 5                  | 3              | 2  | 4  | 3  | 1 |   |   |   |    | 3 | 2 | 1  | 4 | 3 | 1 |   |   |   |
| Erysipelotrichaceae |                    |                    |                    | 4                  | 1              | 3  | 4  | 1  | 3 |   |   |   |    | 3 | 1 | 2  | 3 | 1 | 2 |   |   |   |
| Lactobacillaceae    |                    |                    |                    | 4                  | 1              | 3  | 4  | 1  | 3 |   |   |   |    | 3 | 1 | 2  | 3 | 1 | 2 |   |   |   |
| Leuconostocaceae    |                    |                    |                    | 2                  | 2              | 0  | 2  | 2  | 0 |   |   |   |    | 2 | 2 | 0  |   |   |   |   |   |   |
| Streptococcaceae    |                    |                    |                    | 4                  | 3              | 1  | 4  | 3  | 1 |   |   |   |    | 3 | 2 | 1  | 3 | 2 | 1 |   |   |   |
| Clostridia          |                    |                    |                    | Clostridiales      | Clostridiaceae | 9  | 3  | 6  | 9 | 3 | 6 |   |    |   | 9 | 3  | 6 | 8 | 2 | 6 |   |   |
| Eubacteriaceae      |                    | 5                  | 4                  |                    | 1              | 5  | 4  | 1  |   |   |   |   | 4  | 4 | 0 | 4  | 3 | 1 |   |   |   |   |
| Lachnospiraceae     |                    | 20                 | 8                  |                    | 12             | 19 | 7  | 12 | 3 | 0 | 3 |   | 14 | 5 | 9 | 13 | 6 | 7 | 6 | 1 | 5 |   |
| Oscillospiraceae    |                    | 4                  | 3                  |                    | 1              | 4  | 3  | 1  |   |   |   |   | 4  | 3 | 1 | 4  | 3 | 1 |   |   |   |   |
| Ruminococcaceae     |                    | 15                 | 6                  |                    | 9              | 15 | 6  | 9  | 4 | 1 | 3 |   | 10 | 5 | 5 | 11 | 4 | 7 | 4 | 2 | 2 |   |
| Erysipelotrichia    |                    | Erysipelotrichales | Turicibacteraceae  | 2                  | 0              | 2  | 2  | 0  | 2 |   |   |   |    |   |   |    |   |   |   |   |   |   |
| Negativicutes       |                    | Acidaminococcales  | Acidaminococcaceae | 8                  | 5              | 3  | 8  | 5  | 3 |   |   |   | 7  | 4 | 3 | 6  | 3 | 3 | 2 | 2 | 0 |   |
|                     |                    | Veillonellales     | Veillonellaceae    | 6                  | 4              | 2  | 5  | 3  | 2 |   |   |   | 5  | 3 | 2 | 5  | 3 | 2 |   |   |   |   |
| Patescibacteria     |                    | Saccharimonadia    | Saccharimonadales  | Saccharimonadaceae | 2              | 2  | 0  | 2  | 2 | 0 |   |   |    |   |   |    |   |   | 2 | 2 | 0 |   |
| Proteobacteria      | Betaproteobacteria | Burkholderiales    | Burkholderiaceae   | 3                  | 2              | 1  | 3  | 2  | 1 |   |   |   | 3  | 2 | 1 | 3  | 2 | 1 |   |   |   |   |
|                     |                    |                    | Oxalobacteraceae   | 2                  | 0              | 2  |    |    |   |   |   |   |    |   |   |    |   |   |   |   |   |   |
|                     |                    |                    | Sutterellaceae     | 2                  | 0              | 2  | 2  | 0  | 2 |   |   |   |    | 2 | 0 | 2  | 2 | 0 | 2 |   |   |   |
|                     |                    |                    | Campylobacteriales | Campylobacteraceae | 2              | 2  | 0  | 2  | 2 | 0 |   |   |    | 2 | 2 | 0  |   |   |   |   |   |   |

|                     |                  |                    |    |    |   |    |   |   |   |   |   |   |   |   |   |   |   |   |   |   |
|---------------------|------------------|--------------------|----|----|---|----|---|---|---|---|---|---|---|---|---|---|---|---|---|---|
| Gammaproteobacteria | Enterobacterales | Enterobacteriaceae | 13 | 10 | 3 | 12 | 9 | 3 | 2 | 2 | 0 | 9 | 6 | 3 | 8 | 5 | 3 | 4 | 4 | 0 |
|                     | Pasteurellales   | Pasteurellaceae    | 3  | 1  | 2 | 3  | 1 | 2 |   |   |   | 3 | 1 | 2 | 3 | 1 | 2 |   |   |   |

**Table S6.** Commensal microbiota alterations at Genus level in patients with depression.

| Microorganisms |                |                  |                            |                    | Commensal microbiota   |                  |                  | Gut microbiota         |                  |                  |                        |                  |                  |                        |                  |                  |                        |                  |                  |                        |                  |                  |   |   |   |
|----------------|----------------|------------------|----------------------------|--------------------|------------------------|------------------|------------------|------------------------|------------------|------------------|------------------------|------------------|------------------|------------------------|------------------|------------------|------------------------|------------------|------------------|------------------------|------------------|------------------|---|---|---|
|                |                |                  |                            |                    |                        |                  |                  | Total                  |                  |                  | American               |                  |                  | Chinese                |                  |                  | MDD                    |                  |                  | Depression             |                  |                  |   |   |   |
|                |                |                  |                            |                    | Total no. of frequency | No. of increased | No. of decreased | Total no. of frequency | No. of increased | No. of decreased | Total no. of frequency | No. of increased | No. of decreased | Total no. of frequency | No. of increased | No. of decreased | Total no. of frequency | No. of increased | No. of decreased | Total no. of frequency | No. of increased | No. of decreased |   |   |   |
| Phylum         | Class          | Order            | Family                     | Genus              |                        |                  |                  |                        |                  |                  |                        |                  |                  |                        |                  |                  |                        |                  |                  |                        |                  |                  |   |   |   |
| Actinobacteria | Actinobacteria | Actinomycetales  | Actinomycetaceae           | Actinomyces        | 6                      | 5                | 1                | 4                      | 4                | 0                |                        |                  |                  | 4                      | 4                | 0                | 4                      | 4                | 0                |                        |                  |                  |   |   |   |
|                |                |                  | Bifidobacteriales          | Bifidobacteriaceae | Bifidobacterium        | 11               | 4                | 7                      | 11               | 4                | 7                      |                  |                  |                        | 9                | 4                | 5                      | 8                | 4                | 4                      | 3                | 0                | 3 |   |   |
|                | Coriobacteria  | Coriobacteriales | Coriobacteriaceae          | Collinsella        | Collinsella            | 4                | 3                | 1                      | 4                | 3                | 1                      |                  |                  |                        | 3                | 2                | 1                      | 2                | 2                | 0                      | 2                | 1                | 1 |   |   |
|                |                |                  |                            | Atopobiaceae       | Atopobium              | 2                | 2                | 0                      | 2                | 2                | 0                      |                  |                  |                        | 2                | 2                | 0                      | 2                | 2                | 0                      |                  |                  |   |   |   |
|                |                |                  |                            | Olsenella          | Olsenella              | 4                | 3                | 1                      | 4                | 3                | 1                      |                  |                  |                        | 4                | 3                | 1                      | 3                | 3                | 0                      |                  |                  |   |   |   |
|                |                |                  |                            | Adlercreutzia      | Adlercreutzia          | 2                | 2                | 0                      | 2                | 2                | 0                      |                  |                  |                        | 2                | 2                | 0                      | 2                | 2                | 0                      |                  |                  |   |   |   |
|                |                |                  |                            | Eggerthellales     | Eggerthellaceae        | Eggerthella      | 7                | 7                      | 0                | 7                | 7                      | 0                |                  |                        |                  | 6                | 6                      | 0                | 7                | 7                      | 0                |                  |   |   |   |
|                |                |                  | Granulicatella             | Granulicatella     | 2                      | 2                | 0                | 2                      | 2                | 0                |                        |                  |                  | 2                      | 2                | 0                |                        |                  |                  | 2                      | 2                | 0                |   |   |   |
| Bacteroidetes  | Bacteroidia    | Bacteroidales    | Bacteroidaceae             | Bacteroides        | 18                     | 8                | 10               | 17                     | 8                | 9                | 2                      | 1                | 1                | 11                     | 5                | 6                | 12                     | 7                | 5                | 5                      | 1                | 4                |   |   |   |
|                |                |                  |                            | Barnesiella        | 6                      | 1                | 5                | 6                      | 1                | 5                |                        |                  |                  | 3                      | 1                | 2                | 2                      | 1                | 1                | 4                      | 0                | 4                |   |   |   |
|                |                |                  | Odoribacteraceae           | Butyricimonas      | 2                      | 1                | 1                | 2                      | 1                | 1                |                        |                  |                  | 2                      | 1                | 1                |                        |                  |                  |                        |                  |                  |   |   |   |
|                |                |                  |                            | Odoribacter        | 3                      | 1                | 2                | 3                      | 1                | 2                |                        |                  |                  | 3                      | 1                | 2                | 2                      | 1                | 1                |                        |                  |                  |   |   |   |
|                |                |                  | Prevotellaceae             | Alloprevotella     | 2                      | 1                | 1                | 2                      | 1                | 1                |                        |                  |                  | 2                      | 1                | 1                |                        |                  |                  |                        |                  |                  |   |   |   |
|                |                |                  |                            | Paraprevotella     | 6                      | 6                | 0                | 6                      | 6                | 0                |                        |                  |                  | 3                      | 3                | 0                | 3                      | 3                | 0                | 3                      | 3                | 0                | 3 | 3 | 0 |
|                |                |                  |                            | Prevotella         | 10                     | 5                | 5                | 9                      | 4                | 5                |                        |                  |                  | 7                      | 3                | 4                | 7                      | 3                | 4                | 3                      | 2                | 1                |   |   |   |
|                |                |                  |                            | Prevotella-2       | 3                      | 1                | 2                | 2                      | 0                | 2                |                        |                  |                  | 2                      | 0                | 2                | 2                      | 0                | 2                |                        |                  |                  |   |   |   |
|                |                |                  |                            | Prevotella-9       | 3                      | 2                | 1                | 2                      | 1                | 1                |                        |                  |                  | 2                      | 1                | 1                | 3                      | 2                | 1                |                        |                  |                  |   |   |   |
|                |                |                  | Tannerellaceae             | Alistipes          | 12                     | 7                | 5                | 11                     | 6                | 5                |                        |                  |                  | 8                      | 4                | 4                | 7                      | 5                | 2                | 4                      | 1                | 3                |   |   |   |
|                |                |                  | Parabacteroides            | Parabacteroides    | 9                      | 8                | 1                | 9                      | 8                | 1                |                        |                  |                  | 8                      | 7                | 1                | 7                      | 7                | 0                | 2                      | 1                | 1                |   |   |   |
| Firmicutes     | Bacilli        | Bacillales       | Bacillales_incertae_se_dis | Gemella            | 2                      | 2                | 0                |                        |                  |                  |                        |                  |                  |                        |                  |                  |                        |                  |                  |                        |                  |                  |   |   |   |
|                |                |                  | Enterococcaceae            | Enterococcus       | 5                      | 4                | 1                | 4                      | 4                | 0                |                        |                  |                  | 3                      | 3                | 0                | 3                      | 3                | 0                |                        |                  |                  |   |   |   |
|                |                | Lactobacillales  | Lactobacillaceae           | Lactobacillus      | 9                      | 5                | 4                | 9                      | 5                | 4                |                        |                  |                  | 5                      | 4                | 1                | 6                      | 4                | 2                | 3                      | 1                | 2                |   |   |   |
|                |                |                  | Weissella                  | Weissella          | 2                      | 0                | 2                | 2                      | 0                | 2                |                        |                  |                  | 2                      | 0                | 2                |                        |                  |                  |                        |                  |                  |   |   |   |
|                |                |                  | Streptococcaceae           | Streptococcus      | 11                     | 9                | 2                | 9                      | 7                | 2                |                        |                  |                  | 8                      | 7                | 1                | 7                      | 5                | 2                | 2                      | 2                | 0                |   |   |   |



|  |  |  |  |                         |    |   |    |    |   |    |   |   |   |    |   |    |    |   |   |   |   |   |
|--|--|--|--|-------------------------|----|---|----|----|---|----|---|---|---|----|---|----|----|---|---|---|---|---|
|  |  |  |  | Anaerotruncus           | 2  | 2 | 0  | 2  | 2 | 0  |   |   |   | 2  | 2 | 0  | 3  | 3 | 0 |   |   |   |
|  |  |  |  | Clostridium_IV          | 2  | 1 | 1  | 2  | 1 | 1  |   |   |   |    |   |    |    |   |   |   |   |   |
|  |  |  |  | Faecalibacterium        | 19 | 3 | 16 | 18 | 2 | 16 | 3 | 0 | 3 | 12 | 2 | 10 | 10 | 2 | 8 | 8 | 0 | 8 |
|  |  |  |  | Flavonifractor          | 5  | 5 | 0  | 5  | 5 | 0  | 2 | 2 | 0 | 3  | 3 | 0  | 4  | 4 | 0 |   |   |   |
|  |  |  |  | Oscillospira            | 2  | 2 | 0  | 2  | 2 | 0  |   |   |   |    |   |    | 2  | 2 | 0 |   |   |   |
|  |  |  |  | Ruminococcaceae_UCG-002 | 2  | 1 | 1  |    |   |    |   |   |   |    |   |    |    |   |   |   |   |   |
|  |  |  |  | Ruminococcaceae_UCG-014 | 2  | 2 | 0  | 2  | 2 | 0  |   |   |   |    |   |    |    |   |   |   |   |   |
|  |  |  |  | Ruminococcus            | 9  | 1 | 8  | 9  | 1 | 8  | 3 | 0 | 3 | 4  | 1 | 3  | 3  | 1 | 2 | 6 | 0 | 6 |
|  |  |  |  | Ruminococcus-1          | 3  | 1 | 2  | 3  | 1 | 2  | 2 | 1 | 1 |    |   |    | 2  | 0 | 2 |   |   |   |
|  |  |  |  | Ruminococcus-2          | 2  | 0 | 2  | 2  | 0 | 2  |   |   |   | 2  | 0 | 2  | 2  | 0 | 2 |   |   |   |
|  |  |  |  | Subdoligranulum         | 3  | 0 | 3  | 3  | 0 | 3  |   |   |   | 2  | 0 | 2  | 2  | 0 | 2 |   |   |   |
|  |  |  |  | Clostridium_XVIII       | 2  | 1 | 1  | 2  | 1 | 1  |   |   |   |    |   |    |    |   |   |   |   |   |
|  |  |  |  | Faecalitalea            | 3  | 2 | 1  | 3  | 2 | 1  |   |   |   | 3  | 2 | 1  | 3  | 2 | 1 |   |   |   |
|  |  |  |  | Holdemania              | 2  | 0 | 2  | 2  | 0 | 2  |   |   |   |    |   |    |    |   |   | 2 | 0 | 2 |
|  |  |  |  | Holdemania              | 5  | 5 | 0  | 5  | 5 | 0  |   |   |   | 3  | 3 | 0  | 4  | 4 | 0 |   |   |   |
|  |  |  |  | Turicibacter            | 4  | 2 | 2  | 4  | 2 | 2  |   |   |   | 2  | 1 | 1  | 3  | 2 | 1 |   |   |   |
|  |  |  |  | Acidaminococcus         | 3  | 3 | 0  | 3  | 3 | 0  |   |   |   | 2  | 2 | 0  | 2  | 2 | 0 |   |   |   |
|  |  |  |  | Phascolarctobacterium   | 7  | 2 | 5  | 7  | 2 | 5  |   |   |   | 6  | 1 | 5  | 6  | 1 | 5 |   |   |   |
|  |  |  |  | Megamonas               | 6  | 1 | 5  | 6  | 1 | 5  |   |   |   | 6  | 1 | 5  | 5  | 1 | 4 |   |   |   |
|  |  |  |  | Mitsuokella             | 3  | 1 | 2  | 2  | 0 | 2  |   |   |   | 2  | 0 | 2  |    |   |   | 2 | 0 | 2 |
|  |  |  |  | Dialister               | 12 | 5 | 7  | 11 | 4 | 7  | 2 | 2 | 0 | 5  | 2 | 3  | 5  | 2 | 3 | 6 | 2 | 4 |
|  |  |  |  | Megasphaera             | 4  | 1 | 3  | 4  | 1 | 3  |   |   |   | 4  | 1 | 3  | 4  | 1 | 3 |   |   |   |
|  |  |  |  | Veillonella             | 8  | 7 | 1  | 7  | 6 | 1  |   |   |   | 6  | 5 | 1  | 2  | 2 | 0 | 5 | 4 | 1 |
|  |  |  |  | Parvimonas              | 4  | 3 | 1  | 3  | 2 | 1  |   |   |   | 3  | 2 | 1  | 2  | 2 | 0 |   |   |   |
|  |  |  |  | Fusobacterium           | 5  | 2 | 3  | 3  | 1 | 2  |   |   |   | 3  | 1 | 2  | 2  | 1 | 1 |   |   |   |
|  |  |  |  | Gemmiger                | 3  | 0 | 3  | 3  | 0 | 3  |   |   |   | 2  | 0 | 2  |    |   |   | 3 | 0 | 3 |
|  |  |  |  | Parasutterella          | 2  | 1 | 1  | 2  | 1 | 1  |   |   |   | 2  | 1 | 1  | 2  | 1 | 1 |   |   |   |
|  |  |  |  | Sutterella              | 8  | 1 | 7  | 8  | 1 | 7  |   |   |   | 7  | 0 | 7  | 6  | 1 | 5 | 2 | 0 | 2 |
|  |  |  |  | Desulfovibrio           | 5  | 4 | 1  | 5  | 4 | 1  |   |   |   | 2  | 2 | 0  | 4  | 3 | 1 |   |   |   |
|  |  |  |  | Campylobacter           | 2  | 1 | 1  | 2  | 1 | 1  |   |   |   | 2  | 1 | 1  |    |   |   |   |   |   |
|  |  |  |  | Enterobacter            | 2  | 1 | 1  | 2  | 1 | 1  |   |   |   | 2  | 1 | 1  | 2  | 1 | 1 |   |   |   |
|  |  |  |  | Escherichia             | 2  | 2 | 0  | 2  | 2 | 0  |   |   |   | 2  | 2 | 0  | 2  | 2 | 0 |   |   |   |
|  |  |  |  | Escherichia-Shigella    | 7  | 5 | 2  | 6  | 4 | 2  |   |   |   | 5  | 3 | 2  | 3  | 2 | 1 | 3 | 2 | 1 |
|  |  |  |  | Klebsiella              | 2  | 1 | 1  | 2  | 1 | 1  |   |   |   | 2  | 1 | 1  | 2  | 1 | 1 |   |   |   |

|                 |                  |                    |                  |             |   |   |   |   |   |   |  |  |  |   |   |   |   |   |   |   |   |   |
|-----------------|------------------|--------------------|------------------|-------------|---|---|---|---|---|---|--|--|--|---|---|---|---|---|---|---|---|---|
|                 |                  | Pasteurellales     | Pasteurellaceae  | Haemophilus | 4 | 1 | 3 | 4 | 1 | 3 |  |  |  | 4 | 1 | 3 | 3 | 0 | 3 |   |   |   |
|                 |                  | Pseudomonadales    | Pseudomonadaceae | Pseudomonas | 2 | 1 | 1 |   |   |   |  |  |  |   |   |   |   |   |   |   |   |   |
| Streptophyta    | Magnoliopsida    | Fabales            | Fabaceae         | Rothia      | 3 | 2 | 1 | 3 | 2 | 1 |  |  |  | 3 | 2 | 1 | 3 | 2 | 1 |   |   |   |
| Verrucomicrobia | Verrucomicrobiae | Verrucomicrobiales | Akkermansiaceae  | Akkermansia | 3 | 2 | 1 | 3 | 2 | 1 |  |  |  | 2 | 2 | 0 |   |   |   | 2 | 1 | 1 |



**Table S7.** Commensal microbiota alterations at Species level in patients with depression.

| Microorganisms |                   |                   |                    |                 |                              | Commensal microbiota      |                            |                  | Gut microbiota         |                  |                  |                        |                  |                  |                        |                  |                  |                        |                  |                  |                        |                  |                  |
|----------------|-------------------|-------------------|--------------------|-----------------|------------------------------|---------------------------|----------------------------|------------------|------------------------|------------------|------------------|------------------------|------------------|------------------|------------------------|------------------|------------------|------------------------|------------------|------------------|------------------------|------------------|------------------|
|                |                   |                   |                    |                 |                              |                           |                            |                  | Total                  |                  |                  | American               |                  |                  | Chines                 |                  |                  | MDD                    |                  |                  | Depression             |                  |                  |
|                |                   |                   |                    |                 |                              | Total no. of frequency    | No. of increased           | No. of decreased | Total no. of frequency | No. of increased | No. of decreased | Total no. of frequency | No. of increased | No. of decreased | Total no. of frequency | No. of increased | No. of decreased | Total no. of frequency | No. of increased | No. of decreased | Total no. of frequency | No. of increased | No. of decreased |
| Phylum         | Class             | Order             | Family             | Genus           | Species                      |                           |                            |                  |                        |                  |                  |                        |                  |                  |                        |                  |                  |                        |                  |                  |                        |                  |                  |
| Actinobacteria | Actinomycetia     | Bifidobacteriales | Bifidobacteriaceae | Bifidobacterium | Bifidobacterium_adolescentis | 3                         | 3                          | 0                | 3                      | 3                | 0                |                        |                  |                  | 2                      | 2                | 0                | 2                      | 2                | 0                |                        |                  |                  |
|                |                   |                   |                    |                 | Bifidobacterium_bifidum      | 2                         | 2                          | 0                | 2                      | 2                | 0                |                        |                  |                  | 2                      | 2                | 0                | 2                      | 2                | 0                |                        |                  |                  |
|                |                   |                   |                    |                 | Bifidobacterium_breve        | 2                         | 2                          | 0                | 2                      | 2                | 0                |                        |                  |                  | 2                      | 2                | 0                | 2                      | 2                | 0                |                        |                  |                  |
|                |                   |                   |                    |                 | Bifidobacterium_dentium      | 2                         | 2                          | 0                | 2                      | 2                | 0                |                        |                  |                  | 2                      | 2                | 0                | 2                      | 2                | 0                |                        |                  |                  |
|                |                   |                   |                    |                 | Bifidobacterium_longum       | 6                         | 4                          | 2                | 6                      | 4                | 2                |                        |                  |                  | 4                      | 3                | 1                | 4                      | 3                | 1                | 2                      | 1                | 1                |
|                | Coriobacteria     | Micrococcales     | Micrococcaceae     | Rothia          | Rothia_mucilaginosa          | 3                         | 2                          | 1                | 2                      | 2                | 0                |                        |                  |                  | 2                      | 2                | 0                | 2                      | 2                | 0                |                        |                  |                  |
|                |                   |                   |                    |                 | Lancefieldella               | 2                         | 2                          | 0                | 2                      | 2                | 0                |                        |                  |                  | 2                      | 2                | 0                | 2                      | 2                | 0                |                        |                  |                  |
|                |                   | Coriobacteriales  | Atopobiaceae       | Olsenella       | Olsenella_uli                | 2                         | 2                          | 0                | 2                      | 2                | 0                |                        |                  |                  | 2                      | 2                | 0                | 2                      | 2                | 0                |                        |                  |                  |
|                |                   |                   |                    |                 | Coriobacteriaceae            | Coriobacterium            | Coriobacterium_glomerans   | 2                | 2                      | 0                | 2                | 2                      | 0                |                  |                        |                  | 2                | 2                      | 0                | 2                | 2                      | 0                |                  |
|                |                   |                   | Eggerthellales     | Eggerthellaceae | Adlercreutzia                | Adlercreutzia_équoficiens | 3                          | 2                | 1                      | 3                | 2                | 1                      |                  |                  |                        | 2                | 1                | 1                      | 2                | 1                | 1                      |                  |                  |
| Eggerthella    | Eggerthella_lenta | 3                 |                    |                 | 3                            | 0                         | 3                          | 3                | 0                      |                  |                  |                        | 3                | 3                | 0                      | 3                | 3                | 0                      |                  |                  |                        |                  |                  |
| Bacteroidetes  | Bacteroidia       | Bacteroidales     | Bacteroidaceae     | Bacteroides     | Bacteroides_caccae           | 3                         | 2                          | 1                | 3                      | 2                | 1                | 2                      | 1                | 1                |                        |                  |                  | 2                      | 2                | 0                |                        |                  |                  |
|                |                   |                   |                    |                 | Bacteroides_dorei            | 2                         | 2                          | 0                | 2                      | 2                | 0                |                        |                  |                  |                        |                  |                  |                        |                  |                  |                        |                  |                  |
|                |                   |                   |                    |                 | Bacteroides_fragilis         | 3                         | 3                          | 0                | 3                      | 3                | 0                |                        |                  |                  | 2                      | 2                | 0                | 2                      | 2                | 0                |                        |                  |                  |
|                |                   |                   |                    |                 | Bacteroides_massiliensis     | 3                         | 2                          | 1                | 3                      | 2                | 1                |                        |                  |                  | 2                      | 1                | 1                | 2                      | 1                | 1                |                        |                  |                  |
|                |                   |                   |                    |                 | Bacteroides_nordii           | 2                         | 2                          | 0                | 2                      | 2                | 0                |                        |                  |                  |                        |                  |                  |                        |                  |                  |                        |                  |                  |
|                |                   |                   |                    |                 | Bacteroides_plebeius         | 2                         | 1                          | 1                | 2                      | 1                | 1                |                        |                  |                  | 2                      | 1                | 1                |                        |                  |                  |                        |                  |                  |
|                |                   |                   |                    |                 | Bacteroides_stercoris        | 3                         | 2                          | 1                | 3                      | 2                | 1                | 2                      | 1                | 1                |                        |                  |                  |                        |                  |                  | 2                      | 1                | 1                |
|                |                   |                   |                    |                 | Bacteroides_thetaiotaomicron | 4                         | 4                          | 0                | 4                      | 4                | 0                |                        |                  |                  | 3                      | 3                | 0                | 2                      | 2                | 0                | 2                      | 2                | 0                |
|                |                   |                   |                    |                 | Bacteroides_uniformis        | 2                         | 2                          | 0                | 2                      | 2                | 0                |                        |                  |                  |                        |                  |                  |                        |                  |                  |                        |                  |                  |
|                |                   |                   |                    |                 | Bacteroides_vulgatus         | 2                         | 1                          | 1                | 2                      | 1                | 1                |                        |                  |                  |                        |                  |                  |                        |                  |                  |                        |                  |                  |
|                |                   |                   |                    |                 | Prevotellaceae               | Paraprevotella            | Paraprevotella_xylaniphila | 2                | 2                      | 0                | 2                | 2                      | 0                |                  |                        |                  | 2                | 2                      | 0                | 2                | 2                      | 0                |                  |
|                |                   |                   |                    |                 |                              |                           | Prevotella                 | Prevotella_copri | 2                      | 2                | 0                | 2                      | 2                | 0                |                        |                  |                  |                        |                  |                  |                        |                  |                  |
|                |                   |                   |                    |                 |                              | Prevotella_melaninogenica | 2                          | 2                | 0                      | 2                | 2                | 0                      |                  |                  |                        | 2                | 2                | 0                      | 2                | 2                | 0                      |                  |                  |
|                |                   |                   |                    |                 | Rikenellaceae                | Alistipes                 | Alistipes_finegoldii       | 2                | 2                      | 0                | 2                | 2                      | 0                |                  |                        |                  |                  |                        |                  |                  |                        |                  |                  |
|                |                   |                   |                    |                 |                              |                           | Alistipes_onderdonkii      | 3                | 3                      | 0                | 3                | 3                      | 0                | 2                | 2                      | 0                |                  |                        |                  | 2                | 2                      | 0                |                  |



|                 |                     |                    |                     |                       |                            |                             |   |   |   |   |   |   |   |   |   |   |   |   |   |   |   |   |   |  |  |
|-----------------|---------------------|--------------------|---------------------|-----------------------|----------------------------|-----------------------------|---|---|---|---|---|---|---|---|---|---|---|---|---|---|---|---|---|--|--|
|                 | Negativicutes       | Acidaminococcales  | Acidaminococcaceae  | Acidaminococcus       | Acidaminococcus_fermentans | 2                           | 2 | 0 | 2 | 2 | 0 |   |   |   | 2 | 2 | 0 | 2 | 2 | 0 |   |   |   |  |  |
|                 |                     |                    |                     |                       | Acidaminococcus_intestini  | 2                           | 2 | 0 | 2 | 2 | 0 |   |   |   | 2 | 2 | 0 | 2 | 2 | 0 |   |   |   |  |  |
|                 |                     | Veillonellales     | Veillonellaceae     | Megasphaera           | Megasphaera_elsdenii       | 2                           | 2 | 0 | 2 | 2 | 0 |   |   |   | 2 | 2 | 0 | 2 | 2 | 0 |   |   |   |  |  |
| Proteobacteria  | Deltaproteobacteria | Desulfovibrionales | Desulfovibrionaceae | Bilophila             | Bilophila_wadsworthia      | 2                           | 2 | 0 | 2 | 2 | 0 |   |   |   |   |   |   |   |   |   |   |   |   |  |  |
|                 |                     |                    |                     |                       | Desulfovibrio              | Desulfovibrio_desulfuricans | 2 | 2 | 0 | 2 | 2 | 0 |   |   |   |   |   |   |   |   |   |   |   |  |  |
|                 |                     |                    |                     |                       |                            | Desulfovibrio_vulgaris      | 2 | 2 | 0 | 2 | 2 | 0 |   |   |   |   | 2 | 2 | 0 | 2 | 2 | 0 |   |  |  |
|                 | Gammaproteobacteria | Enterobacterales   | Enterobacteriaceae  | Enterobacter          | Enterobacter_cloacae       | 2                           | 2 | 0 | 2 | 2 | 0 |   |   |   | 2 | 2 | 0 | 2 | 2 | 0 |   |   |   |  |  |
|                 |                     |                    |                     |                       | Enterococcus_faecalis      | 2                           | 1 | 1 | 2 | 1 | 1 |   |   |   | 2 | 1 | 1 | 2 | 1 | 1 |   |   |   |  |  |
|                 |                     |                    |                     |                       | Escherichia                | Escherichia_coli            | 4 | 4 | 0 | 4 | 4 | 0 |   |   |   | 4 | 4 | 0 | 3 | 3 | 0 |   |   |  |  |
|                 |                     |                    | Klebsiella          | Klebsiella_pneumoniae | 2                          | 1                           | 1 | 2 | 1 | 1 |   |   |   |   |   |   | 2 | 1 | 1 |   |   |   |   |  |  |
|                 |                     |                    | Pasteurellales      | Pasteurellaceae       | Haemophilus                | Haemophilus_parainfluenzae  | 5 | 0 | 5 | 4 | 0 | 4 |   |   |   | 3 | 0 | 3 | 4 | 0 | 4 |   |   |  |  |
|                 |                     |                    |                     |                       |                            |                             |   |   |   |   |   |   |   |   |   |   |   |   |   |   |   |   |   |  |  |
| Verrucomicrobia | Verrucomicrobiae    | Verrucomicrobiales | Akkermanssiaceae    | Akkermansia           | Akkermansia_muciniphila    | 5                           | 3 | 2 | 5 | 3 | 2 | 2 | 1 | 1 | 3 | 2 | 1 | 3 | 2 | 1 | 2 | 1 | 1 |  |  |

**Table S8.** Commensal microbiota alterations at Phylum, Class, Order, and Family levels in animal models of depression.

| Microorganisms | Commensal microbiota  | Total                  |                  |                  |                        |                  |                  |                        |                  |                  |                        |                  |                  |                        |                  |                  |                        |                  |                  |                        |                  |                  |
|----------------|-----------------------|------------------------|------------------|------------------|------------------------|------------------|------------------|------------------------|------------------|------------------|------------------------|------------------|------------------|------------------------|------------------|------------------|------------------------|------------------|------------------|------------------------|------------------|------------------|
|                |                       | Total                  |                  |                  | Mice                   |                  |                  | Rats                   |                  |                  | Fecal samples          |                  |                  | Cecum contents         |                  |                  | Colon contents         |                  |                  |                        |                  |                  |
|                |                       | Total no. of frequency | No. of increased | No. of decreased | Total no. of frequency | No. of increased | No. of decreased | Total no. of frequency | No. of increased | No. of decreased | Total no. of frequency | No. of increased | No. of decreased | Total no. of frequency | No. of increased | No. of decreased | Total no. of frequency | No. of increased | No. of decreased | Total no. of frequency | No. of increased | No. of decreased |
|                | <b>Phylum</b>         |                        |                  |                  |                        |                  |                  |                        |                  |                  |                        |                  |                  |                        |                  |                  |                        |                  |                  |                        |                  |                  |
|                | Actinobacteria        | 35                     | 14               | 21               | 35                     | 14               | 21               | 27                     | 9                | 18               | 8                      | 5                | 3                | 30                     | 11               | 19               | 5                      | 3                | 2                |                        |                  |                  |
|                | Bacteroidetes         | 73                     | 40               | 33               | 73                     | 40               | 33               | 49                     | 25               | 24               | 22                     | 15               | 7                | 51                     | 29               | 22               | 17                     | 9                | 8                | 5                      | 2                | 3                |
|                | Cyanobacteria         | 11                     | 3                | 8                | 11                     | 3                | 8                | 8                      | 3                | 5                | 3                      | 0                | 3                | 9                      | 2                | 7                | 2                      | 1                | 1                |                        |                  |                  |
|                | Deferribacteres       | 12                     | 7                | 5                | 12                     | 7                | 5                | 11                     | 7                | 4                |                        |                  |                  | 11                     | 7                | 4                |                        |                  |                  |                        |                  |                  |
|                | Firmicutes            | 78                     | 28               | 50               | 78                     | 28               | 50               | 55                     | 18               | 37               | 23                     | 10               | 13               | 58                     | 20               | 38               | 15                     | 6                | 9                | 5                      | 2                | 3                |
|                | Proteobacteria        | 48                     | 37               | 11               | 48                     | 37               | 11               | 41                     | 31               | 10               | 7                      | 6                | 1                | 34                     | 26               | 8                | 10                     | 6                | 4                | 6                      | 5                | 1                |
|                | Tenericutes           | 15                     | 5                | 10               | 15                     | 5                | 10               | 13                     | 4                | 9                | 2                      | 1                | 1                | 14                     | 5                | 9                |                        |                  |                  |                        |                  |                  |
|                | TM7                   | 5                      | 2                | 3                | 5                      | 2                | 3                | 4                      | 2                | 2                |                        |                  |                  | 4                      | 1                | 3                |                        |                  |                  |                        |                  |                  |
|                | Verrucomicrobia       | 30                     | 14               | 16               | 30                     | 14               | 16               | 23                     | 11               | 12               | 7                      | 3                | 4                | 18                     | 7                | 11               | 8                      | 5                | 3                | 4                      | 2                | 2                |
|                | <b>Phylum</b>         |                        |                  |                  |                        |                  |                  |                        |                  |                  |                        |                  |                  |                        |                  |                  |                        |                  |                  |                        |                  |                  |
|                | <b>Class</b>          |                        |                  |                  |                        |                  |                  |                        |                  |                  |                        |                  |                  |                        |                  |                  |                        |                  |                  |                        |                  |                  |
|                | Actinobacteria        | 9                      | 7                | 2                | 9                      | 7                | 2                | 3                      | 2                | 1                | 5                      | 4                | 1                | 4                      | 2                | 2                | 3                      | 3                | 0                |                        |                  |                  |
|                | Coriobacteria         | 4                      | 1                | 3                | 4                      | 1                | 3                | 3                      | 1                | 2                |                        |                  |                  | 4                      | 1                | 3                |                        |                  |                  |                        |                  |                  |
|                | Bacteroidetes         | 15                     | 7                | 8                | 15                     | 7                | 8                | 12                     | 6                | 6                | 3                      | 1                | 2                | 11                     | 6                | 5                | 3                      | 1                | 2                |                        |                  |                  |
|                | Cyanobacteria         | 3                      | 2                | 1                | 3                      | 2                | 1                | 3                      | 2                | 1                |                        |                  |                  |                        |                  |                  | 2                      | 1                | 1                |                        |                  |                  |
|                | Deferribacteres       | 5                      | 4                | 1                | 5                      | 4                | 1                | 4                      | 3                | 1                |                        |                  |                  | 5                      | 4                | 1                |                        |                  |                  |                        |                  |                  |
|                | Bacilli               | 15                     | 7                | 8                | 15                     | 7                | 8                | 9                      | 4                | 5                | 6                      | 3                | 3                | 8                      | 3                | 5                | 5                      | 3                | 2                |                        |                  |                  |
|                | Clostridia            | 17                     | 11               | 6                | 17                     | 11               | 6                | 12                     | 7                | 5                | 5                      | 4                | 1                | 11                     | 7                | 4                | 3                      | 1                | 2                | 2                      | 2                | 0                |
|                | Erysipelotrichia      | 10                     | 3                | 7                | 10                     | 3                | 7                | 9                      | 3                | 6                |                        |                  |                  | 8                      | 2                | 6                |                        |                  |                  |                        |                  |                  |
|                | Negativicutes         | 2                      | 1                | 1                | 2                      | 1                | 1                |                        |                  |                  |                        |                  |                  | 2                      | 1                | 1                |                        |                  |                  |                        |                  |                  |
|                | Alphaproteobacteria   | 6                      | 0                | 6                | 6                      | 0                | 6                | 5                      | 0                | 5                |                        |                  |                  | 4                      | 0                | 4                | 2                      | 0                | 2                |                        |                  |                  |
|                | Betaproteobacteria    | 7                      | 5                | 2                | 7                      | 5                | 2                | 2                      | 1                | 1                | 5                      | 4                | 1                | 3                      | 2                | 1                | 3                      | 3                | 0                |                        |                  |                  |
|                | Deltaproteobacteria   | 9                      | 7                | 2                | 9                      | 7                | 2                | 4                      | 4                | 0                | 5                      | 3                | 2                | 6                      | 6                | 0                |                        |                  |                  |                        |                  |                  |
|                | Epsilonproteobacteria | 7                      | 7                | 0                | 7                      | 7                | 0                | 6                      | 6                | 0                |                        |                  |                  | 4                      | 4                | 0                | 2                      | 2                | 0                |                        |                  |                  |
|                | Gammaproteobacteria   | 8                      | 8                | 0                | 8                      | 8                | 0                | 7                      | 7                | 0                |                        |                  |                  | 6                      | 6                | 0                |                        |                  |                  |                        |                  |                  |
|                | Spirochaetes          | 3                      | 2                | 1                | 3                      | 2                | 1                | 3                      | 2                | 1                |                        |                  |                  | 3                      | 2                | 1                |                        |                  |                  |                        |                  |                  |
|                | Tenericutes           | 7                      | 4                | 3                | 7                      | 4                | 3                | 6                      | 4                | 2                |                        |                  |                  | 6                      | 4                | 2                |                        |                  |                  |                        |                  |                  |





|                 |                     |                     |                       |    |    |    |    |    |    |    |    |    |    |   |   |    |    |    |   |   |   |   |   |   |
|-----------------|---------------------|---------------------|-----------------------|----|----|----|----|----|----|----|----|----|----|---|---|----|----|----|---|---|---|---|---|---|
|                 |                     |                     | Peptostreptococcaceae | 12 | 7  | 5  | 12 | 7  | 5  | 7  | 6  | 1  | 5  | 1 | 4 | 7  | 3  | 4  | 2 | 2 | 0 | 2 | 1 | 1 |
|                 |                     |                     | Ruminococcaceae       | 45 | 27 | 18 | 45 | 27 | 18 | 31 | 19 | 12 | 13 | 7 | 6 | 34 | 19 | 15 | 7 | 5 | 2 | 3 | 3 | 0 |
|                 | Erysipelotrichia    | Erysipelotrichales  | Erysipelotrichaceae   | 19 | 7  | 12 | 19 | 7  | 12 | 16 | 5  | 11 | 2  | 1 | 1 | 13 | 4  | 9  | 3 | 2 | 1 |   |   |   |
|                 | Negativicutes       | Acidaminococcales   | Acidaminococcaceae    | 2  | 0  | 2  | 2  | 0  | 2  |    |    |    |    |   |   |    |    |    |   |   |   |   |   |   |
|                 | Negativicutes       | Veillonellales      | Veillonellaceae       | 3  | 2  | 1  | 3  | 2  | 1  |    |    |    | 2  | 1 | 1 | 3  | 2  | 1  |   |   |   |   |   |   |
|                 |                     |                     | Anaerovoracaceae      | 3  | 2  | 1  | 3  | 2  | 1  |    |    |    |    |   |   | 2  | 1  | 1  |   |   |   |   |   |   |
|                 |                     |                     | Monoglobaceae         | 2  | 2  | 0  | 2  | 2  | 0  |    |    |    |    |   |   |    |    |    |   |   |   |   |   |   |
| Patescibacteria | Saccharimonadia     | Saccharimonadales   | Saccharimonadaceae    | 3  | 3  | 0  | 3  | 3  | 0  | 3  | 3  | 0  |    |   |   | 2  | 2  | 0  |   |   |   |   |   |   |
|                 |                     | Hyphomicrobiales    | Devosiaceae           | 2  | 0  | 2  | 2  | 0  | 2  | 2  | 0  | 2  |    |   |   |    |    |    |   |   |   |   |   |   |
|                 |                     | Rhizobiales         | Brucellaceae          | 2  | 2  | 0  | 2  | 2  | 0  |    |    |    |    |   |   | 2  | 2  | 0  |   |   |   |   |   |   |
|                 |                     | Rhodospirillales    | Rhodospirillaceae     | 2  | 1  | 1  | 2  | 1  | 1  | 2  | 1  | 1  |    |   |   | 2  | 1  | 1  |   |   |   |   |   |   |
|                 |                     | Sphingomonadales    | Sphingomonadaceae     | 4  | 3  | 1  | 4  | 3  | 1  | 3  | 3  | 0  |    |   |   | 2  | 2  | 0  | 2 | 1 | 1 |   |   |   |
|                 |                     |                     | Alcaligenaceae        | 6  | 2  | 4  | 6  | 2  | 4  | 5  | 2  | 3  |    |   |   | 5  | 2  | 3  |   |   |   |   |   |   |
|                 |                     |                     | Burkholderiaceae      | 3  | 0  | 3  | 3  | 0  | 3  |    |    |    |    |   |   |    |    |    |   |   |   |   |   |   |
|                 |                     |                     | Comamonadaceae        | 3  | 3  | 0  | 3  | 3  | 0  |    |    |    |    |   |   | 2  | 2  | 0  |   |   |   |   |   |   |
|                 |                     |                     | Oxalobacteraceae      | 5  | 4  | 1  | 5  | 4  | 1  | 2  | 1  | 1  | 2  | 2 | 0 |    |    |    | 3 | 3 | 0 |   |   |   |
|                 |                     |                     | Sutterellaceae        | 6  | 1  | 5  | 6  | 1  | 5  | 5  | 1  | 4  |    |   |   | 4  | 0  | 4  | 2 | 1 | 1 |   |   |   |
| Proteobacteria  | Deltaproteobacteria | Desulfiovibrionales | Desulfiovibrionaceae  | 27 | 20 | 7  | 27 | 20 | 7  | 20 | 15 | 5  | 7  | 5 | 2 | 19 | 16 | 3  | 6 | 3 | 3 |   |   |   |
|                 |                     |                     | Campylobacteraceae    | 2  | 0  | 2  | 2  | 0  | 2  |    |    |    |    |   |   |    |    |    |   |   |   |   |   |   |
|                 |                     |                     | Helicobacteraceae     | 15 | 12 | 3  | 15 | 12 | 3  | 12 | 9  | 3  | 2  | 2 | 0 | 12 | 9  | 3  |   |   |   |   |   |   |
|                 |                     |                     | Enterobacteriales     | 14 | 12 | 2  | 14 | 12 | 2  | 13 | 11 | 2  |    |   |   | 11 | 10 | 1  | 2 | 1 | 1 |   |   |   |
|                 |                     |                     | Pasteurellales        | 3  | 2  | 1  | 3  | 2  | 1  |    |    |    |    |   |   | 2  | 2  | 0  |   |   |   |   |   |   |
|                 |                     |                     | Moraxellaceae         | 5  | 3  | 2  | 5  | 3  | 2  | 2  | 1  | 1  | 3  | 2 | 1 | 2  | 1  | 1  | 2 | 2 | 0 |   |   |   |
|                 |                     |                     | Pseudomonadaceae      | 2  | 0  | 2  | 2  | 0  | 2  |    |    |    |    |   |   |    |    |    |   |   |   |   |   |   |
| Spirochaetes    | Spirochaetia        | Spirochaetales      | Spirochaetaceae       | 3  | 2  | 1  | 3  | 2  | 1  | 2  | 1  | 1  |    |   |   | 2  | 1  | 1  |   |   |   |   |   |   |
|                 |                     | Brachyspirales      | Brachyspiraceae       | 2  | 2  | 0  | 2  | 2  | 0  |    |    |    |    |   |   |    |    |    |   |   |   |   |   |   |
|                 |                     |                     | Anaeroplasmatales     | 8  | 3  | 5  | 8  | 3  | 5  | 7  | 2  | 5  |    |   |   | 6  | 3  | 3  | 2 | 0 | 2 |   |   |   |
|                 |                     |                     | Mycoplasmatales       | 3  | 1  | 2  | 3  | 1  | 2  | 3  | 1  | 2  |    |   |   | 2  | 1  | 1  |   |   |   |   |   |   |
|                 |                     |                     | Akkermansiaceae       | 5  | 0  | 5  | 5  | 0  | 5  | 5  | 0  | 5  |    |   |   | 3  | 0  | 3  |   |   |   |   |   |   |
| Verrucomicrobia | Verrucomicrobiae    | Verrucomicrobiales  | Verrucomicrobiaceae   | 10 | 9  | 1  | 10 | 9  | 1  | 8  | 8  | 0  | 2  | 1 | 1 | 4  | 3  | 1  | 4 | 4 | 0 | 2 | 2 | 0 |
|                 |                     |                     | AC160630              | 3  | 1  | 2  | 3  | 1  | 2  | 3  | 1  | 2  |    |   |   | 3  | 1  | 2  |   |   |   |   |   |   |



















**Table S11.** Characteristics of studies investigating the efficiency of gut microbiota-based therapeutics in patients with depression.

| Study                                         | Depression model                                                     | Microbiota-based therapies                                    | Genus                                       | Species                                                                                                                          | Intervention method                                                                                                                                                                                                                          | Depression alleviation                                                                                                  | Gut-brain axis mechanism                          | OCEBM evidence level |
|-----------------------------------------------|----------------------------------------------------------------------|---------------------------------------------------------------|---------------------------------------------|----------------------------------------------------------------------------------------------------------------------------------|----------------------------------------------------------------------------------------------------------------------------------------------------------------------------------------------------------------------------------------------|-------------------------------------------------------------------------------------------------------------------------|---------------------------------------------------|----------------------|
| Kilin çarşlan S et al. 2020 <sup>[1]</sup>    | IBD patients with depression symptoms                                | Fecal microbiota transplantation                              | –                                           | –                                                                                                                                | The fresh stool from healthy donors was diluted with saline before transplantation, and the suspension was prepared by mixing with a spatula. The stool suspension was infused into the patient through colonoscopy                          | The severity of anxiety, depression and obsession in IBD patients decreased after FMT                                   | –                                                 | 3                    |
| Kurokawa S et al. 2018 <sup>[2]</sup>         | IBS patients with depression symptoms                                | Fecal microbiota transplantation                              | –                                           | –                                                                                                                                | Approximately 100 g of feces were collected from the pack, dissolved in 200 mL of saline                                                                                                                                                     | Depression and anxiety symptoms were improved by FMT regardless of gastrointestinal symptom change in patients with IBS | FMT altered disordered fecal microbiota           | 3                    |
| Lin H et al. 2021 <sup>[3]</sup>              | IBS patients with depression symptoms                                | Fecal microbiota transplantation                              | –                                           | –                                                                                                                                | The donor is a healthy 36-year-old male. Patients received FMT treatment (oral administration) from May 2019 to December 2019. The patients took the intestinal flora capsules 3 times in total, once every other day, 30 capsules each time | FMT treatment can effectively alleviate the anxiety and depression behaviors of IBS-D patients                          | FMT treatment regulated the gut microbiota        | 2                    |
| Guo Q et al. 2021 <sup>[4]</sup>              | IBS patients with depression symptoms                                | Fecal microbiota transplantation with enterobacteria capsules | –                                           | –                                                                                                                                | The FMT treatment was intervened by oral enteric capsules for 3 times (every 2 days one time and 30 capsules each time)                                                                                                                      | FMT therapy alleviated anxiety/depression symptom in IBS patients                                                       | FMT therapy restored the intestinal micro-ecology | 2                    |
| Chinna Meyyappan A et al. 2022 <sup>[5]</sup> | Patients with MDD and GAD                                            | Multispecies probiotics                                       | –                                           | Microbial Ecosystem Therapeutic-2 (MET-2), which contained 40 strains of bacteria                                                | During the 8 weeks of treatment, all participants consumed three MET-2 capsules per day orally; each 0.5-g MET-2 capsule contains $3.2 \times 10^3$ to $3.2 \times 10^{11}$ CFU                                                              | Over the course of 10 weeks, MET-2 significantly decreased mean MADRS and GAD-7 scores                                  | –                                                 | 3                    |
| Dao VH et al. 2021 <sup>[6]</sup>             | Chronic gastrointestinal disorders patients with depression symptoms | Multispecies probiotics                                       | Lactobacillus, Bifidobacterium, Lactococcus | B.bifidum W23, B. lactis W52, L. acidophilus W37, L. brevis W63, L. casei W56, L. salivarius W24, Lc. lactis W19, Lc. lactis W58 | The product consists of over $2.5 \times 10^9$ CFU per gram, patients would mix one sachet (2g of product) in 100mL of water for 8 weeks                                                                                                     | After 2 months using the probiotic product, the symptoms of anxiety and depression improved significantly               | –                                                 | 3                    |
| Venkataraman R et al. 2021 <sup>[7]</sup>     | Students facing examination stress                                   | Multi-strain probiotics                                       | Bacillus, Lactobacillus, Bifidobacterium    | Bacillus coagulans Unique IS2, L. rhamnosus UBLR58, B. lactis UBBLa70, L. plantarum UBLP40, B. breve UBBR01, B. infantis UBBi01  | Receiving the multi-strain probiotic (Bacillus coagulans Unique IS2, L. rhamnosus UBLR58, B. lactis UBBLa70, L. plantarum UBLP40 (each of 2 billion CFU); B. breve UBBR01, B. infantis UBBi01                                                | Supplementation of multistrain probiotic significantly reduced the depressive symptoms in students facing examination   | –                                                 | 2                    |



|                                        |                                                   |            |                                                         |                                                                                                                                                                                                                                                                                                                                                   |                                                                                                                                                                                                                                |                                                                                                                                                                                       |                                                                                                                                                                                                      |   |
|----------------------------------------|---------------------------------------------------|------------|---------------------------------------------------------|---------------------------------------------------------------------------------------------------------------------------------------------------------------------------------------------------------------------------------------------------------------------------------------------------------------------------------------------------|--------------------------------------------------------------------------------------------------------------------------------------------------------------------------------------------------------------------------------|---------------------------------------------------------------------------------------------------------------------------------------------------------------------------------------|------------------------------------------------------------------------------------------------------------------------------------------------------------------------------------------------------|---|
|                                        |                                                   |            |                                                         |                                                                                                                                                                                                                                                                                                                                                   | (each of 1 billion CFU)) capsule with glutamine (250 mg) 2 times a day for 28 days                                                                                                                                             |                                                                                                                                                                                       |                                                                                                                                                                                                      |   |
| Akkasheh G et al. 2016 <sup>[8]</sup>  | Patients with MDD                                 | Probiotics | Lactobacillus, Bifidobacterium                          | Lacidophilus, L. casei, B. bifidum                                                                                                                                                                                                                                                                                                                | Patients in the probiotic group received daily one probiotic capsule containing L. acidophilus ( $2 \times 10^9$ CFU/g), L. casei ( $2 \times 10^9$ CFU/g), and B. bifidum ( $2 \times 10^9$ CFU/g) for 8 weeks                | After 8 wk of intervention, patients who received probiotic supplements had significantly decreased Beck Depression Inventory total scores                                            | Probiotic administration in patients with MDD for 8 wk had beneficial effects insulin, homeostasis model assessment of insulin resistance, hs-CRP concentrations, and glutathione concentrations     | 2 |
| Bai & R et al. 2022 <sup>[9]</sup>     | Patients with moderate depression                 | Probiotics | Bacillus, Bifidobacterium, Lactobacillus, Streptococcus | 14 species: B. subtilis PXN@ 21, B. bifidum PXN@ 23, B. breve PXN@ 25, B. infantis PXN@ 27, B. longum PXN@ 30, L. acidophilus PXN@ 35, L. delbrueckii ssp. bulgaricus PXN@ 39, L. casei PXN@ 37, L. plantarum PXN@ 47, L. rhamnosus PXN@ 54, L. helveticus PXN@ 45, L. salivarius PXN@ 57, L. lactis ssp. lactis PXN@ 63, S. thermophilus PXN@ 66 | Participants were asked to take four capsules ( $2 \times 10^9$ CFU) in the morning each day with food within 4 week                                                                                                           | Probiotic intake significantly reduced depression scores on the Patient Health Questionnaire 9                                                                                        | -                                                                                                                                                                                                    | 2 |
| Bambling M et al. 2017 <sup>[10]</sup> | Patients with SSRI treatment resistant depression | Probiotics | Lactobacillus, Bifidobacterium, Streptococcus           | L. acidophilus, B. bifidum, S. thermophiles                                                                                                                                                                                                                                                                                                       | Capsules administered pre meals as a combination of lyophilized probiotics (L. acidophilus, B. bifidum, S. thermophiles total CFU of $2 \times 10^{10}$ ) and magnesium orotate 1600 mg divided in two daily doses for 8 weeks | At the end of an 8-week intervention mean changes for depression scores and quality of life in the group was clinically significantly improved                                        | -                                                                                                                                                                                                    | 3 |
| Chen HM et al. 2021 <sup>[11]</sup>    | Patients with MDD                                 | Probiotics | Lactobacillus                                           | L. plantarum PS128 (PS128)                                                                                                                                                                                                                                                                                                                        | One PS128 capsule twice a day was given to recruited patients, each PS128 capsule contains 300 mg of probiotics, equivalent to $3 \times 10^{10}$ CFU of Lactobacillus plantarum PS128                                         | After 8-week PS128 intervention, scores of Hamilton Depression Rating Scale-17 and Depression and Somatic symptoms Scale significantly decreased                                      | -                                                                                                                                                                                                    | 3 |
| Jamilian M et al. 2018 <sup>[12]</sup> | Women with polycystic ovary syndrome              | Probiotics | Lactobacillus, Bifidobacterium                          | L. acidophilus, L. reuteri, L. fermentum, B. bifidum                                                                                                                                                                                                                                                                                              | Intaking $8 \times 10^9$ CFU/day probiotic containing L. acidophilus, L. reuteri, L. fermentum, B. bifidum ( $2 \times 10^9$ CFU/g each) plus 200 µg/day selenium for 12 weeks                                                 | Probiotic and selenium co-supplementation resulted in a significant improvement in beck depression inventory and depression anxiety and stress scale scores compared with the placebo | Co-administration of probiotic and selenium for 12 weeks to women with PCOS had beneficial effects on mental health parameters, serum total testosterone, hirsutism, hs-CRP, TAC, GSH and MDA levels | 2 |
| Kazem YI et al. 2021 <sup>[13]</sup>   | Healthy female volunteers                         | Probiotics | Bifidobacterium                                         | Yogurt enriched with Bifidobacterium spp.                                                                                                                                                                                                                                                                                                         | All volunteers were given seven cups of yogurt every week (as one cup daily) fortified with the strain specific probiotic which was Bifidobacterium spp. for 8 weeks provided that each cup of yogurt was weighing 100 g       | Bifidobacterium spp. supplementation combined with improvement in dietary intake resulted in improvement of depressive mood and well-being                                            | Bifidobacterium spp. supplementation reduced kynurenine blood level                                                                                                                                  | 3 |

|                                          |                                                         |            |                                                  |                                                                                         |                                                                                                                                                                                                                                                                        |                                                                                                                                                                                                          |                                                                                                       |   |
|------------------------------------------|---------------------------------------------------------|------------|--------------------------------------------------|-----------------------------------------------------------------------------------------|------------------------------------------------------------------------------------------------------------------------------------------------------------------------------------------------------------------------------------------------------------------------|----------------------------------------------------------------------------------------------------------------------------------------------------------------------------------------------------------|-------------------------------------------------------------------------------------------------------|---|
|                                          |                                                         |            |                                                  |                                                                                         | and each gram contained not less than $10^8$ cells of <i>Bifidobacterium</i> spp.                                                                                                                                                                                      |                                                                                                                                                                                                          |                                                                                                       |   |
| Kim CS et al. 2019 <sup>[14]</sup>       | Nationwide individuals                                  | Probiotics | –                                                | –                                                                                       | The types of probiotic food included fermented vegetables (kimchi) and fermented milk products                                                                                                                                                                         | Compared with the lowest tertile of probiotic food consumption, the highest tertile had significantly lower odds in PHQ-9 depression severity and self-reported clinical depression, particularly in men | –                                                                                                     | 4 |
| Lee HJ et al. 2021 <sup>[15]</sup>       | Healthy adults                                          | Probiotics | <i>Lactobacillus</i> ,<br><i>Bifidobacterium</i> | Probiotic NVP-1704, a mixture of <i>L. reuteri</i> NK33 and <i>B. adolescentis</i> NK98 | Each 500 mg capsule of NVP-1704 contained $2.5 \times 10^9$ CFU of microorganisms ( $2.0 \times 10^9$ CFU for <i>L. reuteri</i> NK33 and $0.5 \times 10^9$ CFU for <i>B. adolescentis</i> NK98), two capsules with water were taken once a day, daily, for eight weeks | NVP-1704 group had a more significant reduction in depressive symptoms at four and eight weeks of treatment, and anxiety symptoms at four weeks compared to the placebo group                            | NVP-1704 treatment decreased serum interleukin-6 levels, and regulated the gut microbiota composition | 2 |
| Majeed M et al. 2018 <sup>[16]</sup>     | MDD patients with IBS                                   | Probiotics | <i>Bacillus</i>                                  | <i>Bacillus coagulans</i> MTCC 5856                                                     | Receiving <i>B. coagulans</i> MTCC 5856 at a daily dose of $2 \times 10^9$ CFU (2 billion spores) for 90 days                                                                                                                                                          | <i>B. coagulans</i> MTCC 5856 reduced the depression symptoms in MDD patients with IBS (HAM-D, MADRS)                                                                                                    | <i>B. coagulans</i> MTCC 5856 reduced the level of serum myeloperoxidase                              | 2 |
| Messaoudi M et al. 2011 <sup>[17]</sup>  | Healthy human volunteers                                | Probiotics | <i>Lactobacillus</i> ,<br><i>Bifidobacterium</i> | <i>L. helveticus</i> R0052, <i>B. longum</i> R0175                                      | During or just after breakfast, all volunteers took one stick of 1.5 g/day of probiotics containing <i>L. helveticus</i> R0052 and <i>B. longum</i> R0175 ( $3 \times 10^9$ CFU/stick) for 30 days                                                                     | Administration of probiotics significantly alleviated depression and anxiety in volunteers, as measured by the HSCL-90 scale                                                                             | –                                                                                                     | 2 |
| Mi GL et al. 2015 <sup>[18]</sup>        | Infantile colic and colicky induced maternal depression | Probiotics | <i>Lactobacillus</i>                             | <i>L. reuteri</i> (DSM 17938)                                                           | Participants received <i>L. reuteri</i> at a dose $10^8$ CFU for 28 days and they were followed for 4 weeks                                                                                                                                                            | <i>L. reuteri</i> (DSM 17938) reduces daily crying time and maternal depression during infantile colic                                                                                                   | –                                                                                                     | 2 |
| Miyaoka T et al. 2018 <sup>[19]</sup>    | Patients with treatment-resistant MDD                   | Probiotics | <i>Clostridium</i>                               | <i>C. butyricum</i> MIYAIRI 588 (CBM588)                                                | 20 mg orally twice daily for the first week and 20 mg orally three times daily from weeks 2 to 8                                                                                                                                                                       | CBM588 in combination with antidepressants is effective and well tolerated in the treatment of treatment-resistant MDD                                                                                   | –                                                                                                     | 2 |
| Mohammadi AA et al. 2016 <sup>[20]</sup> | Petrochemical workers                                   | Probiotics | <i>Lactobacillus</i> ,<br><i>Bifidobacterium</i> | <i>L. lactis</i> , <i>L. acidophilus</i> , <i>Bifidobacterium</i>                       | Probiotic and conventional yogurts or multispecies probiotic supplements were provided for participants every day for 6 weeks                                                                                                                                          | After 6 weeks of intervention, a significant improvement of DASS scores was observed in the probiotic yogurt and in the probiotic capsule group                                                          | –                                                                                                     | 2 |
| Moludi J et al. 2019 <sup>[21]</sup>     | Myocardial infarction patients with depression symptoms | Probiotics | <i>Lactobacillus</i>                             | <i>L. rhamnosus</i>                                                                     | Patients in the probiotic group received one probiotic capsule daily containing $1.6 \times 10^9$ CFU of <i>L. rhamnosus</i> with their lunch for 12 weeks                                                                                                             | The total BDI-II score decreased significantly in patients who received probiotic supplements compared with the placebo group                                                                            | Markers of inflammatory and oxidative stress were influenced favorably by probiotic supplements       | 2 |

|                                              |                                                   |            |                                               |                                                                                                                                                                                                                                                                                                                            |                                                                                                                                                                                                      |                                                                                                                           |                                                                                                                                            |   |
|----------------------------------------------|---------------------------------------------------|------------|-----------------------------------------------|----------------------------------------------------------------------------------------------------------------------------------------------------------------------------------------------------------------------------------------------------------------------------------------------------------------------------|------------------------------------------------------------------------------------------------------------------------------------------------------------------------------------------------------|---------------------------------------------------------------------------------------------------------------------------|--------------------------------------------------------------------------------------------------------------------------------------------|---|
| Okubo R et al. 2019 <sup>[22]</sup>          | Schizophrenia patients with depression symptoms   | Probiotics | Bifidobacterium                               | B. breve A-1                                                                                                                                                                                                                                                                                                               | All participants received B. breve strain A-1 ( $10^{11}$ CFU/day) for 4 weeks followed by 4 weeks of observation                                                                                    | B. breve A-1 in improved anxiety and depressive symptoms in patients with schizophrenia                                   | B. breve A-1 administration changed the function of the gut epithelial barrier function related to TRANCE and IL-22                        | 3 |
| Otaka M et al. 2021 <sup>[23]</sup>          | Patients with MDD or BD                           | Probiotics | Lactobacillus                                 | L. casei strain Shirota (LcS )                                                                                                                                                                                                                                                                                             | Daily intake of $8.0 \times 10^{10}$ CFU for 12 weeks                                                                                                                                                | Depression severity, evaluated by the Hamilton Depression Rating Scale, was significantly alleviated after LcS treatment  | LcS was beneficial to alleviate depressive symptoms, partly through its association with abundance of Actinobacteria in the gut microbiota | 3 |
| Pinto-Sanchez MI et al. 2017 <sup>[24]</sup> | IBS patients with depression symptoms             | Probiotics | Bifidobacterium                               | B. longum NCC3001                                                                                                                                                                                                                                                                                                          | Receiving 42 sachets of spray dried B. longum NCC3001 ( $1.0E+10$ CFU/1gram powder with maltodextrin)                                                                                                | Probiotic B. longum NCC3001 reduced depression scores and increased quality of life in patients with IBS                  | The probiotic reduced limbic reactivity                                                                                                    | 2 |
| Qin Q et al. 2021 <sup>[25]</sup>            | Patients with test anxiety                        | Probiotics | Lactobacillus, Bifidobacterium, Streptococcus | $1.2 \times 10^{10}$ CFU of B. longum subsp. Longum BAMA-B05/BauB1024, $1.9 \times 10^{10}$ CFU of B. lactis BAMA-B06/Bau-B0111, $1.5 \times 10^{10}$ CFU of B. adolescentis, $3.2 \times 10^9$ CFU of S. thermophilus, $4.6 \times 10^9$ CFU of L. acidophilus, $3.0 \times 10^9$ CFU of L. delbrueckii subsp. bulgaricus | Taking probiotic supplement preparation for 15 consecutive days (twice per day, and approximately 12-hour set time between two intakes)                                                              | Administration of the PSP markedly alleviated students' depression                                                        | -                                                                                                                                          | 3 |
| Raygan F et al. 2018 <sup>[26]</sup>         | Type 2 diabetic patients with depression symptoms | Probiotics | Lactobacillus, Bifidobacterium                | L. acidophilus, B. bifidum, L. reuteri, L. fermentum                                                                                                                                                                                                                                                                       | Intaking 50,000 IU vitamin D3 every 2 weeks plus $8 \times 10^9$ CFU/g probiotic, containing L. acidophilus, B. bifidum, L. reuteri, and L. fermentum (each $2 \times 10^9$ ) for 12 weeks           | Vitamin D and probiotic co-supplementation resulted in significant improvements in beck depression inventory total scores | Vitamin D and probiotic co-supplementation regulated serum hs-CRP, plasma NO, TAC, glycemic control and HDL-cholesterol levels             | 2 |
| Raygan F et al. 2019 <sup>[27]</sup>         | Type 2 diabetic patients with depression symptoms | Probiotics | Lactobacillus, Bifidobacterium                | L. acidophilus, B. bifidum, L. reuteri, L. fermentum                                                                                                                                                                                                                                                                       | Receiving 200 mg/day selenium as selenium yeast plus $8 \times 10^9$ CFU/day probiotic containing L. acidophilus, L. reuteri, L. fermentum and B. bifidum ( $2 \times 10^9$ CFU/g each) for 12 weeks | Probiotic and selenium co-supplementation significantly decreased Beck Depression Inventory index                         | Probiotic and selenium co-supplementation improved metabolic profiles                                                                      | 2 |
| Sanchez M et al. 2017 <sup>[28]</sup>        | Obese individuals                                 | Probiotics | Lactobacillus                                 | L. rhamnosus CGMCC1.3724                                                                                                                                                                                                                                                                                                   | Participants received two capsules per day , corresponding to an average of $3.24 \times 10^8$ CFU/day for 24 weeks                                                                                  | The LPR female group displayed a more pronounced decrease in the Beck Depression Inventory score                          | -                                                                                                                                          | 2 |
| Slykerman RF et al. 2017 <sup>[29]</sup>     | Postpartum depression                             | Probiotics | Lactobacillus                                 | L. rhamnosus HN001                                                                                                                                                                                                                                                                                                         | Women were randomised to receive either HN001 at a dose of $6 \times 10^9$ CFU, to be taken daily from enrolment until birth and, from birth up till six months post-birth whilst breastfeeding.     | Women who received HN001 had significantly lower depression and anxiety scores in the postpartum period                   | -                                                                                                                                          | 2 |

|                                               |                                                 |                        |                                |                                                                        |                                                                                                                                                                                                                                                                                  |                                                                                                                                           |                                                                                                                                                                |   |
|-----------------------------------------------|-------------------------------------------------|------------------------|--------------------------------|------------------------------------------------------------------------|----------------------------------------------------------------------------------------------------------------------------------------------------------------------------------------------------------------------------------------------------------------------------------|-------------------------------------------------------------------------------------------------------------------------------------------|----------------------------------------------------------------------------------------------------------------------------------------------------------------|---|
| Tian P et al. 2022 <sup>[36]</sup>            | Patients with MDD                               | Probiotics             | Bifidobacterium                | B. breve CCFM1025                                                      | The freeze-dried CCFM1025 in a dose of viable bacteria of $10^{10}$ CFU was given to MDD patients daily for four weeks                                                                                                                                                           | B. breve CCFM1025 showed a better antidepressant-like effect than placebo, based on the HDRS-24 and MADRS evaluation                      | B. breve CCFM1025 changed in the gut microbiome and tryptophan metabolism                                                                                      | 2 |
| Wallace CJK et al. 2021 <sup>[31]</sup>       | Patients with MDD                               | Probiotics             | Lactobacillus, Bifidobacterium | L. helveticus R0052 and B. longum R0175 (CEREBIOME®)                   | Participants consumed a probiotic supplement containing Lactobacillus helveticus R0052 and Bifidobacterium longum R0175 (CEREBIOME®) at a dose of $3 \times 10^9$ CFU once per day for 8 weeks                                                                                   | Significant improvements in depressive symptoms were observed at week 4 and were sustained at week 8                                      | –                                                                                                                                                              | 3 |
| Wu SI et al. 2021 <sup>[32]</sup>             | Information technology specialists              | Probiotics             | Lactobacillus                  | Lactobacillus plantarum PS128TM (PS128TM)                              | Participants were asked to take two capsules containing PS128TM powder, equivalent to 20 billion CFU, daily for 8 weeks                                                                                                                                                          | After 8-week-intervention, participants showed significant decreases in the levels of depression (PHQ-9)                                  | –                                                                                                                                                              | 3 |
| Yamamura R et al. 2021 <sup>[33]</sup>        | Schizophrenic patients with depression symptoms | Probiotics             | Bifidobacterium                | B. breve A-1 (synonym B. breve MCC1274)                                | For the first 4 weeks, the participants consumed two 2-g sachets of freeze-dried Bifidobacterium breve A-1 (synonym B. breve MCC1274) per day, each containing $5.0 \times 10^{10}$ CFU                                                                                          | Probiotic treatment with B. breve A-1 alleviated anxiety and depressive symptoms in patients with schizophrenia                           | It is suggested that an elevated lipid and energy metabolism at baseline might be associated with the effects of probiotics on anxiety and depressive symptoms | 3 |
| Zhang X et al. 2021 <sup>[34]</sup>           | Patients with depression and constipation       | Probiotics             | Lactobacillus                  | Fermented Milk Containing L. paracasei Strain Shirota (LcS)            | The subjects consumed 100 mL of a LcS beverage ( $10^8$ CFU/mL) every day for 9 weeks.                                                                                                                                                                                           | Daily consumption of LcS for 9 weeks appeared to relieve constipation and improve the potentially depressive symptoms in patients         | LcS supplementation significantly decreased the IL-6 levels, and appeared to regulate the intestinal microbiota related to mental illness                      | 2 |
| Kavyani M et al. 2021 <sup>[35]</sup>         | NAFLD patients with depression symptoms         | Prebiotics             | –                              | Resistant dextrin                                                      | The intervention group received 15% of the total daily intake of fat (~20 g) as Camelina sativa oil with 10 g/day of resistant dextrin, 5 g at breakfast and 5 g at dinner for 12 weeks                                                                                          | Supplementation of Camelina sativa oil + resistant dextrin for 12 weeks improved depression symptoms (DASS scores) in patients with NAFLD | Prebiotic and CSO co-supplementation improved glycemic status, metabolic endotoxemia, inflammation, oxidant/antioxidant biomarkers                             | 2 |
| Miki T et al. 2016 <sup>[36]</sup>            | Japanese employees                              | Prebiotics             | –                              | Dietary fiber                                                          | Dietary intake for 58 food and beverage items, energy, and selected nutrients were estimated using an ad hoc computer algorithm for the BDHQ                                                                                                                                     | Dietary fiber intake from vegetables and fruits was significantly inversely associated with depressive symptoms                           | –                                                                                                                                                              | 4 |
| Park M et al. 2020 <sup>[37]</sup>            | Patients with depression                        | Prebiotics             | –                              | Flavonoids                                                             | Participants consumed flavonoid-rich orange juice (serving a daily 380 mL, $600 \pm 5.4$ mg flavonoids) for 8 weeks                                                                                                                                                              | Flavonoid-rich orange juice treatment significantly decreased the depression symptoms (CES-D)                                             | Flavonoid-rich orange juice treatment regulated the gut microbiome                                                                                             | 2 |
| Heidarzadeh-Rad N et al. 2020 <sup>[38]</sup> | Patients with MDD                               | Probiotics, prebiotics | Lactobacillus, Bifidobacterium | L. helveticus R0052, B. longum R0175, and galactooligosaccharide (GOS) | The probiotic sachet containing 10 billion ( $\geq 10 \times 10^9$ ) CFU of freeze-dried L. helveticus R0052 and B. longum R0175, the prebiotic sachets contained 80% GOS powder per sachet. Participants were instructed to consume 1 sachet at the same time daily for 8 weeks | Eight-week supplementation with B. longum and L. helveticus in depressive patients improved depression symptoms                           | Probiotics supplementation resulted in significantly higher serum BDNF levels                                                                                  | 2 |

|                                             |                                                                 |                        |                                |                                                                                                                                                                                                                                                                            |                                                                                                                                                                                                                                                                                                   |                                                                                                                                                                                                           |                                                                                                               |   |
|---------------------------------------------|-----------------------------------------------------------------|------------------------|--------------------------------|----------------------------------------------------------------------------------------------------------------------------------------------------------------------------------------------------------------------------------------------------------------------------|---------------------------------------------------------------------------------------------------------------------------------------------------------------------------------------------------------------------------------------------------------------------------------------------------|-----------------------------------------------------------------------------------------------------------------------------------------------------------------------------------------------------------|---------------------------------------------------------------------------------------------------------------|---|
| Karbownik MS et al. 2022 <sup>[39]</sup>    | Psychiatrically healthy medical students                        | Probiotics, prebiotics | –                              | Fermented food and food-derived prebiotics                                                                                                                                                                                                                                 | An electronic open-ended form of the Food Record was constructed to gather information regarding consumption of 34 selected food items categorized in five classes                                                                                                                                | High intake of fermented food was associated with more severe depressive and anxiety symptoms under stress; however, no such link was observed for food-derived prebiotics                                | –                                                                                                             | 3 |
| Kazemi A et al. 2019 <sup>[40]</sup>        | Patients with MDD                                               | Probiotics, prebiotics | Lactobacillus, Bifidobacterium | L. helveticus R0052, B. longum R0175, and galactooligosaccharide                                                                                                                                                                                                           | The probiotic product contains freeze-dried L. helveticus R0052 and B. longum R0175 bacteria at a dosage 10 × 10 <sup>9</sup> CFU/per 5 g sachet for 8 weeks, and the prebiotic product was composed of galactooligosaccharide and 0.2% Plum flavor                                               | 8 weeks of probiotic supplements to subjects with MDD resulted in an improvement in BDI score compared with placebo whereas no significant effect of prebiotic supplementation was seen                   | The probiotic may exert at least part of its effects on depression through the kynurenine to tryptophan ratio | 2 |
| Moludi J et al. 2021 <sup>[41]</sup>        | Coronary artery disease (CAD) patients with depression symptoms | Probiotics, prebiotics | Lactobacillus                  | L. rhamnosus G                                                                                                                                                                                                                                                             | Receiving one capsule contained 1.9 × 10 <sup>9</sup> CFU of L. rhamnosus per day, or one sachet containing 15 g inulin per day, or both for 8 weeks                                                                                                                                              | Probiotic-Inulin Co-supplementation significantly decreased depression symptoms (BDI)                                                                                                                     | Probiotic plus prebiotic may exert their effects on depression through the inflammatory cytokines and LPS     | 2 |
| Perez-Cornago A et al. 2016 <sup>[42]</sup> | Spanish university graduates                                    | Probiotics, prebiotics | –                              | Yogurt (total, wholefat, and low-fat) and prebiotic ((fructans and galacto-oligosaccharide))                                                                                                                                                                               | Participants were allocated into 4 categories according to servings (1 serving = 125 g) of yogurt (total, whole-fat (3% fat), and low-fat (0.1% fat)) consumed per week: <0.5 servings (<63 g), ≥0.5 to <3 servings (≥63 to <250 g), ≥3 to <7 servings (≥250 to <875 g), and ≥7 servings (≥875 g) | High consumption of whole-fat yogurt was related to a lower risk of depression in women of the SUN cohort                                                                                                 | –                                                                                                             | 3 |
| Hadi A et al. 2019 <sup>[43]</sup>          | Obese or overweight adults                                      | Synbiotics             | Lactobacillus, Bifidobacterium | Synbiotics containing L. acidophilus, L. casei, B. bifidum plus inulin                                                                                                                                                                                                     | Synbiotic supplements in form of a 500 mg capsule contained L. acidophilus, L. casei and B. bifidum (2 × 10 <sup>9</sup> CFU/g each) plus 0.8 g inulin for 8 weeks                                                                                                                                | A significant between-group decrease in depression was found in the synbiotic group compared to the placebo.                                                                                              | Synbiotic supplementation decreased the TG, TC, LDL-C levels                                                  | 2 |
| Haghighat N et al. 2021a <sup>[44]</sup>    | Hemodialysis patients                                           | Synbiotics, probiotics | Lactobacillus, Bifidobacterium | Synbiotic (15 g of prebiotics, 5 g of probiotic containing L. acidophilus T16, B. bifidum BIA-6, B. lactis BIA-7, B. longum BIA-8 (2.7 × 10 <sup>7</sup> CFU/g each)) or probiotics (5 g fructo-oligosaccharides (FOS), 5 g galacto-oligosaccharides (GOS), 5 g of inulin) | Receiving the synbiotic (15 g of prebiotics, 5 g of probiotic containing L. acidophilus T16, B. bifidum BIA-6, B. lactis BIA-7, B. longum BIA-8 (2.7 × 10 <sup>7</sup> CFU/g each)) or probiotics (5 g probiotics as in synbiotic group) for 12 weeks                                             | Synbiotic supplementation resulted in greater improvement in depression symptoms compared to the probiotic supplementation in HD patients especially in the subgroup of patients with depression symptoms | Synbiotic supplementation increased the serum BDNF level                                                      | 2 |
| Haghighat N et al. 2021b <sup>[45]</sup>    | Hemodialysis patients                                           | Synbiotics, probiotics | Lactobacillus, Bifidobacterium | Synbiotic (15 g of prebiotics, 5 g of probiotic containing L. acidophilus T16, B. bifidum BIA-6, B. lactis BIA-7, B. longum BIA-8 (2.7 × 10 <sup>7</sup> CFU/g each)) or probiotics (5 g fructo-oligosaccharides (FOS), 5 g galacto-oligosaccharides (GOS), 5 g of inulin) | Receiving the synbiotic (15 g of prebiotics, 5 g of probiotic containing L. acidophilus T16, B. bifidum BIA-6, B. lactis BIA-7, B. longum BIA-8 (2.7 × 10 <sup>7</sup> CFU/g each)) or probiotics (5 g probiotics as in synbiotic group) for 12 weeks                                             | From baseline to 12 weeks, synbiotic and probiotic supplementation resulted in a significant decrease in BDI and BAI score in comparison to the placebo                                                   | Synbiotic and probiotic supplementation increased the serum Hb level                                          | 2 |

## References

1. S. Kiliñarslan and A. Evrensel, *Actas Esp Psiquiatr* **2020**, *48*, 1-7.
2. S. Kurokawa, T. Kishimoto, S. Mizuno, T. Masaoka, M. Naganuma, K. C. Liang, M. Kitazawa, M. Nakashima, C. Shindo, W. Suda, M. Hattori, T. Kanai and M. Mimura, *J Affect Disord* **2018**, *235*, 506-512.
3. H. Lin, Q. Guo, Z. Wen, S. Tan, J. Chen, L. Lin, P. Chen, J. He, J. Wen and Y. Chen, *Microb Cell Fact* **2021**, *20*, 233.
4. Q. Guo, H. Lin, P. Chen, S. Tan, Z. Wen, L. Lin, J. He, J. Wen and S. Lu, *Bioengineered* **2021**, *12*, 11885-11897.
5. A. Chinna Meyyappan, E. Forth and R. Milev, *Interact J Med Res* **2022**, *11*, e32234.
6. V. H. Dao, L. B. Hoang, T. O. Trinh, T. T. T. Tran and V. L. Dao, *J Multidiscip Healthc* **2021**, *14*, 1395-1402.
7. R. Venkataraman, R. S. Madempudi, J. Neelamraju, J. J. Ahire, H. R. Vinay, A. Lal, G. Thomas and S. Stephen, *Probiotics Antimicrob Proteins* **2021**, *13*, 12-18.
8. G. Akkashah, Z. Kashani-Poor, M. Tajabadi-Ebrahimi, P. Jafari, H. Akbari, M. Taghizadeh, M. R. Memarzadeh, Z. Asemi and A. Esmaillzadeh, *Nutrition* **2016**, *32*, 315-20.
9. R. Baião, L. P. Capitão, C. Higgins, M. Browning, C. J. Harmer and P. W. J. Burnet, *Psychol Med* **2022**, 1-11.
10. M. Bambling, S. C. Edwards, S. Hall and L. Vitetta, *Inflammopharmacology* **2017**, *25*, 271-274.
11. H. M. Chen, P. H. Kuo, C. Y. Hsu, Y. H. Chiu, Y. W. Liu, M. L. Lu and C. H. Chen, *Nutrients* **2021**, *13*,
12. M. Jamilian, S. Mansury, F. Bahmani, Z. Heidar, E. Amirani and Z. Asemi, *J Ovarian Res* **2018**, *11*, 80.
13. Y. I. Kazem, M. H. Mahmoud, H. A. Essa, O. Azmy, W. A. Kandeel, M. Al-Moghazy, I. El-Attar, A. Hasheesh and N. S. Mehanna, *J Complement Integr Med* **2021**,
14. C. S. Kim and D. M. Shin, *Nutrition* **2019**, *63-64*, 169-174.
15. H. J. Lee, J. K. Hong, J. K. Kim, D. H. Kim, S. W. Jang, S. W. Han and I. Y. Yoon, *Nutrients* **2021**, *13*,
16. M. Majeed, K. Nagabhusanam, S. Arumugam, S. Majeed and F. Ali, *Food Nutr Res* **2018**, *62*,
17. M. Messaoudi, R. Lalonde, N. Violle, H. Javelot, D. Desor, A. Nejdi, J. F. Bisson, C. Rougeot, M. Pichelin, M. Cazaubiel and J. M. Cazaubiel, *Br J Nutr* **2011**, *105*, 755-64.

18. G. L. Mi, L. Zhao, D. D. Qiao, W. Q. Kang, M. Q. Tang and J. K. Xu, *Antonie Van Leeuwenhoek* **2015**, *107*, 1547-53.
19. T. Miyaoka, M. Kanayama, R. Wake, S. Hashioka, M. Hayashida, M. Nagahama, S. Okazaki, S. Yamashita, S. Miura, H. Miki, H. Matsuda, M. Koike, M. Izuhara, T. Araki, K. Tsuchie, I. A. Azis, R. Arauchi, R. A. Abdullah, A. Oh-Nishi and J. Horiguchi, *Clin Neuropsychopharmacol* **2018**, *41*, 151-155.
20. A. A. Mohammadi, S. Jazayeri, K. Khosravi-Darani, Z. Solati, N. Mohammadpour, Z. Asemi, Z. Adab, M. Djalali, M. Tehrani-Doost, M. Hosseini and S. Eghtesadi, *Nutr Neurosci* **2016**, *19*, 387-395.
21. J. Moludi, M. Alizadeh, M. H. S. Mohammadzad and M. Davari, *Psychosom Med* **2019**, *81*, 770-777.
22. R. Okubo, M. Koga, N. Katsumata, T. Odamaki, S. Matsuyama, M. Oka, H. Narita, N. Hashimoto, I. Kusumi, J. Xiao and Y. J. Matsuoka, *J Affect Disord* **2019**, *245*, 377-385.
23. M. Otaka, H. Kikuchi-Hayakawa, J. Ogura, H. Ishikawa, Y. Yomogida, M. Ota, S. Hidese, I. Ishida, M. Aida, K. Matsuda, M. Kawai, S. Yoshida and H. Kunugi, *Microorganisms* **2021**, *9*.
24. M. I. Pinto-Sanchez, G. B. Hall, K. Ghajar, A. Nardelli, C. Bolino, J. T. Lau, F. P. Martin, O. Cominetti, C. Welsh, A. Rieder, J. Traynor, C. Gregory, G. De Palma, M. Pigrau, A. C. Ford, J. Macri, B. Berger, G. Bergonzelli, M. G. Surette, S. M. Collins, P. Moayyedi and P. Bercik, *Gastroenterology* **2017**, *153*, 448-459.e8.
25. Q. Qin, H. Liu, Y. Yang, Y. Wang, C. Xia, P. Tian, J. Wei, S. Li and T. Chen, *Dis Markers* **2021**, *2021*, 5597401.
26. F. Raygan, V. Ostadmohammadi, F. Bahmani and Z. Asemi, *Prog Neuropsychopharmacol Biol Psychiatry* **2018**, *84*, 50-55.
27. F. Raygan, V. Ostadmohammadi and Z. Asemi, *Clin Nutr* **2019**, *38*, 1594-1598.
28. M. Sanchez, C. Darimont, S. Panahi, V. Drapeau, A. Marette, V. H. Taylor, J. Doré and A. Tremblay, *Nutrients* **2017**, *9*,
29. R. F. Slykerman, F. Hood, K. Wickens, J. M. D. Thompson, C. Barthow, R. Murphy, J. Kang, J. Rowden, P. Stone, J. Crane, T. Stanley, P. Abels, G. Purdie, R. Maude and E. A. Mitchell, *EBioMedicine* **2017**, *24*, 159-165.
30. P. Tian, Y. Chen, H. Zhu, L. Wang, X. Qian, R. Zou, J. Zhao, H. Zhang, L. Qian, Q. Wang, G. Wang and W. Chen, *Brain Behav Immun* **2022**, *100*, 233-241.
31. C. J. K. Wallace and R. V. Milev, *Front Psychiatry* **2021**, *12*, 618279.
32. S. I. Wu, C. C. Wu, P. J. Tsai, L. H. Cheng, C. C. Hsu, I. K. Shan, P. Y. Chan, T. W. Lin, C. J. Ko, W. L. Chen and Y. C. Tsai, *Front Nutr* **2021**, *8*, 614105.

33. R. Yamamura, R. Okubo, N. Katsumata, T. Odamaki, N. Hashimoto, I. Kusumi, J. Xiao and Y. J. Matsuoka, *J Pers Med* **2021**, *11*,
34. X. Zhang, S. Chen, M. Zhang, F. Ren, Y. Ren, Y. Li, N. Liu, Y. Zhang, Q. Zhang and R. Wang, *Nutrients* **2021**, *13*,
35. M. Kavyani, S. Saleh-Ghadimi, P. Dehghan, M. Abbasalizad Farhangi and M. Khoshbaten, *Food Funct* **2021**, *12*, 8594-8604.
36. T. Miki, M. Eguchi, K. Kurotani, T. Kochi, K. Kuwahara, R. Ito, Y. Kimura, H. Tsuruoka, S. Akter, I. Kashino, I. Kabe, N. Kawakami and T. Mizoue, *Nutrition* **2016**, *32*, 584-9.
37. M. Park, J. Choi and H. J. Lee, *Nutrients* **2020**, *12*,
38. N. Heidarzadeh-Rad, H. Gökmen-Özel, A. Kazemi, N. Almasi and K. Djafarian, *J Neurogastroenterol Motil* **2020**, *26*, 486-495.
39. M. S. Karbownik, L. Mokros, M. Dobielska, M. Kowalczyk and E. Kowalczyk, *Front Nutr* **2022**, *9*, 850249.
40. A. Kazemi, A. A. Noorbala, K. Azam, M. H. Eskandari and K. Djafarian, *Clin Nutr* **2019**, *38*, 522-528.
41. J. Moludi, H. Khedmatgozar, S. M. Nachvak, H. Abdollahzad, M. Moradinazar and A. Sadeghpour Tabaci, *Nutr Neurosci* **2021**, 1-10.
42. A. Perez-Cornago, A. Sanchez-Villegas, M. Bes-Rastrollo, A. Gea, P. Molero, F. Lahortiga-Ramos and M. A. Martínez-González, *J Nutr* **2016**, *146*, 1731-9.
43. A. Hadi, M. Sepandi, W. Marx, S. Moradi and K. Parastouei, *Complement Ther Med* **2019**, *47*, 102216.
44. N. Haghighat, S. Rajabi and M. Mohammadshahi, *Nutr Neurosci* **2021a**, *24*, 490-499.
45. N. Haghighat, M. Mohammadshahi, S. Shayanpour, M. H. Haghighizadeh, S. Rahmdel and M. Rajaei, *Indian J Nephrol* **2021b**, *31*, 149-156.



**Table S12.** Characteristics of studies investigating the efficiency of gut microbiota-based therapeutics in animal models of depression.

| Study                                         | Object              | Depression model                   | Microbiota-based therapies                                | Genus                          | Species                                                                                                             | Intervention method                                                                                                                                                                                                                                        | Depression alleviation                                                                                                                                                 | Gut-brain axis mechanism                                                                                                                                                                                                                            |
|-----------------------------------------------|---------------------|------------------------------------|-----------------------------------------------------------|--------------------------------|---------------------------------------------------------------------------------------------------------------------|------------------------------------------------------------------------------------------------------------------------------------------------------------------------------------------------------------------------------------------------------------|------------------------------------------------------------------------------------------------------------------------------------------------------------------------|-----------------------------------------------------------------------------------------------------------------------------------------------------------------------------------------------------------------------------------------------------|
| Rao J et al. 2021a <sup>[1]</sup>             | Sprague-Dawley rats | CUMS-depression                    | Fecal microbiota transplantation                          | –                              | –                                                                                                                   | FMT group was administered a gavage of fecal supernatant with $2 \times 10^8$ fecal microbiota for 14 consecutive days                                                                                                                                     | Fecal microbiota transplantation improved the CUMS-induced depressive-like behavior                                                                                    | Fecal microbiota transplantation altered the gut microbiota imbalance, and alleviated the intestinal tract inflammation, intestinal mucosa disruption, and neuroinflammation                                                                        |
| Rao J et al. 2021b <sup>[2]</sup>             | Sprague-Dawley rats | CUMS-depression                    | Fecal microbiota transplantatio                           | –                              | –                                                                                                                   | For each rat, 1 ml of bacterial suspension ( $2 \times 10^8$ CFU/ml) was transplanted to each of the recipient rat by gavage each day for consecutive 14 days                                                                                              | Treatment with fecal microbiota transplantation ameliorated depression-like behaviors                                                                                  | Treatment with fecal microbiota transplantation suppressed activation of glial cells and NLRP3 inflammasome in the brain                                                                                                                            |
| Han SK et al. 2021 <sup>[3]</sup>             | C57BL/6 mice        | RS-depression<br>FMT-RS-depression | Fecal microbiota transplantation                          | –                              | –                                                                                                                   | 0.2 mL of the fecal microbiota suspension were orally gavaged in (the stomach of ) mice once a day for 5 days                                                                                                                                              | Fecal transplantation of vehicle-treated control or RS/CSS-treated mice into RS-exposed mice significantly mitigated RS-induced anxiety- and depressive-like behaviors | Fecal transplantation treatment suppressed the NF- $\kappa$ B activation in the hippocampus and colon, reduced the IL-6 and corticosterone levels in the blood, and regulated gut microbiota composition                                            |
| Marcondes Ávila PR et al. 2020 <sup>[4]</sup> | Wistar rats         | CMS-depression                     | Fecal microbiota transplantation                          | –                              | –                                                                                                                   | An equivalent of $3 \times 10^8$ cells in a 100- $\mu$ L solution was given to each rat for five consecutive days by gavage                                                                                                                                | FMT treatment improved depressive-related (open-field) behavior                                                                                                        | Manipulation of the microbiota reversed the behavioral and biochemical changes induced by the CMS protocol, and the vagus nerve influenced the gut-brain axis response                                                                              |
| Xu Z et al. 2018 <sup>[5]</sup>               | C57BL/6 mice        | Alcohol-induced depression         | Fecal microbiota transplantation                          | –                              | –                                                                                                                   | Mice in FMT group received 200 $\mu$ L suspensions with a minimum dose of approximately $10^{10}$ bacteria at each oral gavage (from 3 male healthy volunteers )                                                                                           | FMT significantly decreased anxiety- and depressive-like behaviors                                                                                                     | –                                                                                                                                                                                                                                                   |
| Zhang Y et al. 2019 <sup>[6]</sup>            | C57BL/6 mice        | CUS-depression                     | Fecal microbiota transplantation                          | –                              | –                                                                                                                   | Antibiotic-treated mice were orally challenged with 300 $\mu$ l fecal transplants (approximately $2 \times 10^8$ viable probiotic bacteria dissolved in sterile PBS) by gavaging on 3 consecutive days                                                     | Transplantation of the NLRP3 KO microbiota alleviated the CUS-induced depressive-like behaviors                                                                        | FMT significantly ameliorated astrocyte dysfunction in recipient mice treated with CUS via inhibition of circHIPK2 expression                                                                                                                       |
| Zhou H et al. 2022 <sup>[7]</sup>             | C57BL/6 mice        | Dcf1 KO-depression                 | Fecal microbiota transplantation and probiotics treatment | Lactobacillus, Bifidobacterium | L. reuteri, L. murinus, B. longum                                                                                   | Microbial transplantation was performed at 9:00 a.m. each day for 14 days. L. murinus, L. reuteri, and B. longum were diluted using 0.9% NaCl to a density of $10^9$ CFU/mL.                                                                               | Depression-like behavior of KO group was relieved following transplantation with L. reuteri, L. murinus, B. longum                                                     | Lactobacillus rescued depressive symptoms by restoring GABA levels                                                                                                                                                                                  |
| Wu Z et al. 2021 <sup>[8]</sup>               | C57/B6              | CSDS-depression                    | Fermentate of bacteria                                    | Lactobacillus, Streptococcus   | Adzuki bean sprout fermented milk generated by L. bulgaricus, S. thermophilus, L. plantarum 15953, and L. brevis J1 | Administration of full dose of adzuki bean sprout fermented milk (high, 0.4 mL per day), half dose of adzuki bean sprout fermented milk (medium, 0.2 mL of per day), and a low dose of adzuki bean sprout fermented milk (low, 0.1 mL per day) for 10 days | GABA-enriched adzuki bean sprout fermented milk alleviated the depression-like                                                                                         | GABA-enriched adzuki bean sprout fermented milk treatment regulated the GABA <sub>B</sub> -cAMP-PKA-CREB) signaling pathway and increased the monoamine transmitters (5-hydroxytryptamine, norepinephrine, and dopamine) in the hippocampus of mice |

|                                          |                                                              |                                |                                    |                                                      |                                                                                                                                                                                                                               |                                                                                                                                                                                                                                                |                                                                                                                    |                                                                                                                                                                                                                                                                                     |
|------------------------------------------|--------------------------------------------------------------|--------------------------------|------------------------------------|------------------------------------------------------|-------------------------------------------------------------------------------------------------------------------------------------------------------------------------------------------------------------------------------|------------------------------------------------------------------------------------------------------------------------------------------------------------------------------------------------------------------------------------------------|--------------------------------------------------------------------------------------------------------------------|-------------------------------------------------------------------------------------------------------------------------------------------------------------------------------------------------------------------------------------------------------------------------------------|
| Han SK et al. 2020a <sup>[9]</sup>       | C57BL/6 mice                                                 | IS-depression<br>EC-depression | Fermentate of Bifidobacteria       | Bifidobacteria                                       | Bifidobacteria-Fermented Red Ginseng and Its Constituents Ginsenoside Rd and Protopanaxatriol                                                                                                                                 | 10 mg/kg/day of RG; 25 mg/kg/day of RG; 50 mg/kg/day of RG; 10 mg/kg/day of fRG; 25 mg/kg/day of fRG; and 50 mg/kg/day of fRG dissolved in 1% maltose were orally gavaged once a day for 5 days                                                | Treatment with RG and fRG significantly mitigated the stress-induced anxiety/depression-like behaviors             | fRG and its constituents Rd and protopanaxatriol mitigated anxiety/depression and colitis by regulating NF- $\kappa$ B-mediated BDNF expression and gut dysbiosis                                                                                                                   |
| Ko CY et al. 2013 <sup>[50]</sup>        | Sprague-Dawley rats                                          | FST-depression                 | Fermentate of probiotics           | Lactobacillus                                        | Fermented black soybean milk by <i>L. brevis</i> FPA 3709                                                                                                                                                                     | Feeding with 48-h fermented black soybean milk at a dosage of 35 mg/kg b.w. including 2.5 mg GABA/kg b.w., and a double-dosage sample group (70 mg/kg b.w. including 5.0 mg GABA/kg b.w.) for 28 days                                          | Oral feeding of 48-h fermented product significantly reduced the duration of immobility in a dose dependent manner | The underlying mechanism for the antidepressant effect of this fermented product merits further research into the changes in the profile of monoamines, such as serotonin, dopamine, and norepinephrine, in rat brains                                                              |
| Warda AK et al. 2019 <sup>[11]</sup>     | C57BL/6 mice                                                 | ADR-159-depression             | Heat-killed fermentate of bacteria | Lactobacillus                                        | ADR-159, a heat-killed fermentate generated by <i>L. fermentum</i> and <i>L. delbrueckii</i>                                                                                                                                  | ADR-159 was incorporated into standard mice chow to a final concentration of 5%, equivalent to approximately $3 \times 10^9$ cell bodies per gram of chow                                                                                      | ADR-159 fed animals exhibited depressive- and anxiety like behaviors                                               | ADR-159 fed animals had significantly lower base line corticosterone levels and disturbed microbial community                                                                                                                                                                       |
| Xu N et al. 2018 <sup>[12]</sup>         | ICR mice                                                     | Constipation-depression        | Multispecies probiotics            | bifidobacteria, lactobacillus, lactococcus and yeast | No data                                                                                                                                                                                                                       | The probiotic group was given probiotic (10 mg/kg daily by gavage), for 14 consecutive days                                                                                                                                                    | Administration of a probiotic ameliorated depressive behaviors                                                     | Probiotics alleviated depression through protecting neuronal health via activation of the AKT signaling pathway                                                                                                                                                                     |
| Abildgaard A et al. 2021 <sup>[13]</sup> | Flinders sensitive line rats<br>Flinders resistant line rats | FSL-depression                 | Multi-species probiotics           | Bifidobacterium, Lactococcus and Lactobacillus       | 9 strains: <i>B. bifidum</i> W23, <i>B. lactis</i> W51, <i>B. lactis</i> W52, <i>L. acidophilus</i> W37, <i>L. brevis</i> W63, <i>L. casei</i> W56, <i>L. salivarius</i> W24, <i>Lc. lactis</i> W19 and <i>Lc. lactis</i> W58 | Receiving a bottle of 4.5 g ( $2.5 \times 10^9$ CFU/g) freeze-dried probiotics dissolved in 30 mL of tap water for 12 weeks. The treatments were administered daily between 4 and 6 pm and completely emptied by the animals during the night. | Probiotics has effects on the gut microbiota composition associated with depressive-like behaviour                 | -                                                                                                                                                                                                                                                                                   |
| Li N et al. 2018 <sup>[14]</sup>         | C57BL/6 mice                                                 | CMS-depression                 | Multistrain probiotics             | Bifidobacterium, Lactobacillus                       | <i>L. helveticus</i> R0052, <i>L. plantarum</i> R1012, <i>B. longum</i> R0175                                                                                                                                                 | The bacterial solution (200 $\mu$ l or $2 \times 10^9$ CFU) was administered by oral gavage daily for 4 weeks during the experimental procedure                                                                                                | Probiotics attenuated CMS-induced anxiety- and depressive-like behaviors                                           | Probiotics treatment modulated the gut microbiota-inflammation-brain axis, characterized by regulated gut microbiota, decreased hippocampal levels of proinflammatory cytokines (IFN- $\gamma$ and TNF- $\alpha$ ), and direct or inflammatory-mediated inhibition of IDO1 activity |
| Liu QF et al. 2020 <sup>[15]</sup>       | ICR mice                                                     | IS-depression                  | Multi-strains probiotics           | Bifidobacterium, Lactobacillus, Pediococcus          | <i>L. plantarum</i> LP3, <i>L. rhamnosus</i> LR5, <i>B. lactis</i> BL3, <i>B. breve</i> BR3, <i>P. pentosaceus</i> PP1                                                                                                        | Probiotic formulation (500 $\mu$ l; $2 \times 10^9$ CFU/mL) was subsequently administered to mice subjected to stress conditions over a 4-week period                                                                                          | Probiotic administration alleviated depressive-like behaviors                                                      | Ingested probiotics altered the composition of gut microbiota and decreased corticosterone level in serum                                                                                                                                                                           |

|                                                |                              |                                       |                            |                                             |                                                                                                                                                        |                                                                                                                                                                                                                                        |                                                                                                                                                    |                                                                                                                                                                                                             |
|------------------------------------------------|------------------------------|---------------------------------------|----------------------------|---------------------------------------------|--------------------------------------------------------------------------------------------------------------------------------------------------------|----------------------------------------------------------------------------------------------------------------------------------------------------------------------------------------------------------------------------------------|----------------------------------------------------------------------------------------------------------------------------------------------------|-------------------------------------------------------------------------------------------------------------------------------------------------------------------------------------------------------------|
| Ding Y et al. 2021 <sup>[16]</sup>             | C57BL/6 mice                 | CRS-depression                        | Next-generation probiotics | Akkermansia, Lactobacillus                  | A. muciniphila ATCC® BAA-835™, L. plantarum CICC® 23,133                                                                                               | 200 µl (5 × 10 <sup>8</sup> CFU/mL) of A. muciniphila was administered via gavage for 3 weeks<br>200 µl (5 × 10 <sup>8</sup> CFU/mL or 5 × 10 <sup>9</sup> CFU/mL) of L. plantarum was administered via gavage for 3 weeks             | A. muciniphila and high-dose Lactobacillus plantarum treatments ameliorated CRS-induced depressive-like behaviors in mice                          | A. muciniphila treatment regulated abnormal variations in hormone (corticosterone), neurotransmitter (dopamine and serotonin), and BDNF expression levels in CRS-induced mice, and regulated gut microbiota |
| Abildgaard A et al 2017a <sup>[17]</sup>       | Sprague-Dawley rats          | Fed with a control or high-fat diet   | Probiotics                 | Lactobacillus, Bifidobacterium              | 8 bacterial strains: B. bifidum W23, B. lactis W52, L. acidophilus W37, L. brevis W63, L. casei W56, L. salivarius W24, Lc. Lactis W19, Lc. Lactis W58 | Each cage received a bottle containing 4.5 g(2.5 × 10 <sup>9</sup> CFU/g) of freeze-dried powder dissolved in 30 mL of tap water, the bottles were administered daily between four and six pm for 5 weeks                              | Probiotic treatment markedly reduced depressive-like behaviour in the forced swim test                                                             | Probiotic treatment regulated the HPA axis, immune system and microbial tryptophan metabolism                                                                                                               |
| Abildgaard A et al. 2017b <sup>[18]</sup>      | Flinders Sensitive Line rats | HFD-depression                        | Probiotics                 | Lactobacillus, Bifidobacterium              | 8 bacterial strains: B. bifidum W23, B. lactis W52, L. acidophilus W37, L. brevis W63, L. casei W56, L. salivarius W24, Lc. Lactis W19, Lc. Lactis W58 | Each cage received a bottle containing 4.5 g(2.5 × 10 <sup>9</sup> CFU/g) of freeze-dried powder dissolved in 30 mL of tap water, the bottles were administered daily between four and six pm for 5 weeks                              | Probiotic treatment protects against the pro-depressant-like effect of high-fat diet in Flinders Sensitive Line rats                               | Probiotic treatment regulated cerebral T cell populations demonstrating that lymphocyte-brain interactions as a promising future research area in the field of psychoneuroimmunology                        |
| Abildgaard A et al. 2019 <sup>[19]</sup>       | Sprague-Dawley rats          | -                                     | Probiotics                 | Bifidobacterium, Lactococcus, Lactobacillus | B. bifidum W23, B. lactis W51, B. lactis W52, L. acidophilus W37, L. brevis W63, L. casei W56, L. salivarius W24, Lc. Lactis W19 and Lc. lactis W58    | Each probiotics cage of two rats was administered a bottle of 4.5 g (2.5 × 10 <sup>9</sup> CFU/g) freeze-dried PRO in a carrier matrix (maize starch, maltodextrins and vegetable protein) dissolved in 30 mL of tap water for 8 weeks | Probiotics had antidepressant-like effect                                                                                                          | The cohabiting microbiota and the faecal abundance of probiotics may modulate the antidepressant-like effect of probiotics in rats                                                                          |
| Agusti A et al. 2018 <sup>[20]</sup>           | C57BL/6 mice                 | HFD-depression                        | Probiotics                 | Bifidobacterium                             | B. pseudocatenulatum CECT 7765                                                                                                                         | Receiving a daily dose of 1 × 10 <sup>9</sup> CFU B. pseudocatenulatum CECT 7765 by gavage for 14 weeks                                                                                                                                | B. pseudocatenulatum CECT 7765 ameliorated depressive-like behaviors                                                                               | B. pseudocatenulatum CECT 7765 regulated the endocrine and immune mediators of the gut-brain axis.                                                                                                          |
| Arseneault-Bre & J et al. 2012 <sup>[21]</sup> | Sprague-Dawley rats          | Post-myocardial infarction depression | Probiotics                 | Lactobacillus, Bifidobacterium              | L. helveticus R0052, B. longum R0175                                                                                                                   | For 7 d before MI and between the 7th post-MI day and euthanasia, half the MI and sham rats were given one billion live bacterial cells of L. helveticus R0052 and B. longum R0175 per d dissolved in water                            | L. helveticus R0052 and B. longum R0175 combination interfered with the development of post-MI depressive behaviour                                | The beneficial impact of probiotics combination also includes the maintenance of intestinal barrier integrity, which may contribute to the inflammatory state observed after MI                             |
| Arslanov A et al. 2021 <sup>[22]</sup>         | mice                         | Antibiotic-depression                 | Probiotics                 | Lactobacillus                               | Two strains: L. rhamnosus B-8238, L. plantarum 8PA3                                                                                                    | Receiving 1 mL drinking water contained 2 × 10 <sup>5</sup> CFU/mL of a lactobacilli mixture (1:1) once a day for 14 days                                                                                                              | Lactobacillus treatments decrease the anxiety level, increase the muscle endurance and motor coordination, and improve cognitive functions of mice | Lactobacillus treatments decreased the inflammation and oxidative stress, and improved microbiota content                                                                                                   |

|                                             |                     |                                         |            |                                               |                                                                                                                                                                                                                                                                                                                         |                                                                                                                                                                                                                                          |                                                                                                                                 |                                                                                                                                                                                         |
|---------------------------------------------|---------------------|-----------------------------------------|------------|-----------------------------------------------|-------------------------------------------------------------------------------------------------------------------------------------------------------------------------------------------------------------------------------------------------------------------------------------------------------------------------|------------------------------------------------------------------------------------------------------------------------------------------------------------------------------------------------------------------------------------------|---------------------------------------------------------------------------------------------------------------------------------|-----------------------------------------------------------------------------------------------------------------------------------------------------------------------------------------|
| Aygun H et al. 2022 <sup>[23]</sup>         | WAG/Rij rats        | Depressive-like behavior in WAG/Rij rat | Probiotics | Lactobacillus, Bifidobacterium, Streptococcus | VSL#3 contains 4 strains of Lactobacillus ( <i>L. plantarum</i> , <i>L. acidophilus</i> , <i>L. delbrueckii</i> subsp. <i>bulgaricus</i> and <i>L. casei</i> ), 3 strains of Bifidobacterium ( <i>B. longum</i> , <i>B. breve</i> , <i>B. infantis</i> ) and Streptococcus <i>salivarius</i> subsp. <i>Thermophilus</i> | VSL#3 at the doses of 12.86 bn living bacteria/kg/day in 0.5 ml for 30 day by gavage                                                                                                                                                     | VSL#3 supplementation exhibited anxiolytic and anti-depressive effect                                                           | VSL#3 supplement also increased the NGF immunoreactivity while decreasing IL-6, TNF- $\alpha$ and NO levels in WAG/Rij rat brain                                                        |
| Barros-Santos T et al. 2020 <sup>[24]</sup> | Swiss mice          |                                         | Probiotics | Lactobacillus                                 | <i>L. plantarum</i> 286 (Lp 286), <i>L. plantarum</i> 81 (Lp 81)                                                                                                                                                                                                                                                        | Mice were treated daily for 30 days with single doses of 0.1 ml vehicle solution supplemented with Lp 286 ( $10^9/0.1$ ml CFU) or Lp 81 ( $10^9/0.1$ ml CFU)                                                                             | The <i>L. plantarum</i> 286 strain exerted antidepressant- effects under our experimental conditions                            | -                                                                                                                                                                                       |
| Bharwani A et al. 2017 <sup>[25]</sup>      | C57BL/6 mice        | CDSDS-depression                        | Probiotics | Lactobacillus                                 | <i>L. rhamnosus</i> JB-1                                                                                                                                                                                                                                                                                                | Gavaging with 200 $\mu$ l ( $1.67 \times 10^9$ CFU) of <i>L. rhamnosus</i> (JB-1) <sup>TM</sup> for 28 days                                                                                                                              | JB-1 treatment partially corrected the adverse effects of stress on social preference, exploration, and anxiety-like behaviours | JB-1 treatment promoted systemic changes in the immunoregulatory phenotype and influenced the effects of chronic stress on host immunity                                                |
| Birmann PT et al. 2021 <sup>[26]</sup>      | Swiss mice          | LPS-depression                          | Probiotics | Komagataella                                  | <i>K. pastoris</i> KM71H                                                                                                                                                                                                                                                                                                | Mice were treated with <i>K. pastoris</i> KM71H in the concentration of 8 log UFC/g/per animal by intragastric route (i.g.) for a period of 14 consecutive days for CRS stress and 7 days for LPS stress                                 | <i>K. pastoris</i> KM71H prevented depression-like behavior induced by stress                                                   | <i>K. pastoris</i> KM71H modulated the permeability of the blood-brain barrier, prevented an inflammatory response and oxidative stress, and decreased the plasma corticosterone levels |
| Bravo JA et al. 2011 <sup>[27]</sup>        | BALB/c mice         | Healthy status                          | Probiotics | Lactobacillus                                 | <i>L. rhamnosus</i> (JB-1)                                                                                                                                                                                                                                                                                              | Animals were orally gavaged with broth with <i>L. rhamnosus</i> (JB-1) $10^9$ CFU daily between 8:00 and 9:00 for a period of 28 continuous days                                                                                         | <i>L. rhamnosus</i> (JB-1) reduced stress-induced anxiety- and depression-related behavior                                      | <i>L. rhamnosus</i> (JB-1) modulated the GABAergic system in mice and therefore may have beneficial effects in the treatment of depression and anxiety                                  |
| Chen P et al. 2019 <sup>[28]</sup>          | BALB/c mice         | UCMS-depression                         | Probiotics | Lactobacillus                                 | Three strains: <i>L. reuteri</i> , <i>L. murinus</i> , <i>L. johnsonii</i>                                                                                                                                                                                                                                              | Gavaging with 200 $\mu$ l bacterial suspension of <i>L. reuteri</i> ( $3 \times 10^9$ CFU/mL in pre-reduced PBS) for another 30 days                                                                                                     | <i>Lactobacillus reuteri</i> has a significant therapeutic effect on depression                                                 | Oral administration of <i>Lactobacillus reuteri</i> increased brain serotonin levels and serotonin-positive cells in the dorsal raphe nucleus, and modulated microbiota                 |
| Chen T et al. 2021 <sup>[29]</sup>          | C57BL/6N mice       | CRS-depression<br>FMT CRS-depression    | Probiotics | Akkermansia                                   | <i>A. muciniphila</i>                                                                                                                                                                                                                                                                                                   | Orally administration of another 100 $\mu$ l of <i>A. muciniphila</i> containing $1 \times 10^9$ bacteria for 14 days                                                                                                                    | <i>A. muciniphila</i> supplementation alleviated depression-like behaviors                                                      | <i>A. muciniphila</i> supplementation prevented mucosal barrier defects and aggravation of colitis, and modified the gut microbiota                                                     |
| Chen X et al. 2022 <sup>[30]</sup>          | Sprague-Dawley rats | Lead exposure-depression                | Probiotics | Lactobacillus, Bifidobacterium                | -                                                                                                                                                                                                                                                                                                                       | Probiotics (6 billion live bacteria/2 g) were administered to the rats by gavage 5 times a week, at least $1.2 \times 10^9$ CFU combined strains were given to each rat, and doses as high as $4.8 \times 10^{10}$ CFU were administered | Probiotic intervention relieved the depression-like behavior of lead-exposed rats                                               | Probiotic intervention altered the gut microbiome, while the fecal SCFAs could be a possible adjuvant therapy of depression                                                             |

|                                                |                         |                               |            |                                                            |                                                                                                                  |                                                                                                                                                                                                                                                                                                                                                                                                                       |                                                                                                                                                                                              |                                                                                                                                                                                                                                                                                |
|------------------------------------------------|-------------------------|-------------------------------|------------|------------------------------------------------------------|------------------------------------------------------------------------------------------------------------------|-----------------------------------------------------------------------------------------------------------------------------------------------------------------------------------------------------------------------------------------------------------------------------------------------------------------------------------------------------------------------------------------------------------------------|----------------------------------------------------------------------------------------------------------------------------------------------------------------------------------------------|--------------------------------------------------------------------------------------------------------------------------------------------------------------------------------------------------------------------------------------------------------------------------------|
| Chen Y et al. 2021b <sup>[31]</sup>            | Sprague-Dawley rats     | CUMS-depression               | Probiotics | Rhizopus, Bacillus                                         | Semen Sojiae Praeparatum, a fermented food by <i>R. chinensis</i> 12 and <i>Bacillus</i> sp. DU-106              | The rats were given a daily dose of 0.97 g/kg Semen Sojiae Praeparatum (dissolved in 10 mL of normal saline) for 4 weeks                                                                                                                                                                                                                                                                                              | Semen Sojiae Praeparatum fermented by <i>R. chinensis</i> 12 and <i>Bacillus</i> sp. DU-106 could ameliorate depressive behaviors.                                                           | Semen Sojiae Praeparatum regulated the metabolite levels in the serum and hippocampus tissue, reversed the cell morphology and mitochondrial function of hippocampal neurons through improving the imbalance in gut microbiota and inhibiting the excessive SCFAs accumulation |
| Chevalier G et al. 2020 <sup>[32]</sup>        | C57BL/6J mice           | UCMS-depression               | Probiotics | Lactobacillus                                              | <i>L. plantarum</i> <sup>WLI</sup>                                                                               | Supplementing with oral feeding 5 days a week with $2 \times 10^8$ CFU of <i>L. plantarum</i> <sup>WLI</sup> diluted in 200 $\mu$ l of PBS                                                                                                                                                                                                                                                                            | Complementation with <i>L. plantarum</i> <sup>WLI</sup> normalized depression-like behaviors                                                                                                 | Complementation with <i>L. plantarum</i> <sup>WLI</sup> : improved lipid metabolism and the generation of eCBs, leading to increased signaling in the eCB system and adult neurogenesis in the hippocampus                                                                     |
| Choi J et al. 2019 <sup>[33]</sup>             | C57BL/6J mice           | CRS-depression                | Probiotics | Lactobacillus                                              | Extracellular vesicles (EV) from <i>L. plantarum</i>                                                             | L-EVs at a dose of 0.1 $\mu$ g/kg were intraperitoneally injected into a mouse at a volume of 100 $\mu$ l 30 min prior to restraint treatment for 14 days: for the post-stress period, L-EVs were intraperitoneally injected at a volume of 100 $\mu$ l containing increasingly higher doses; 0.1 $\mu$ g/kg for the first 5 days, 0.18 $\mu$ g/kg for the following 2 days, and 0.27 $\mu$ g/kg for the final 7 days | L-EV treatment in CRST-treated mice rescued stress-induced depressive-like behaviors                                                                                                         | L-EV treatment in CRST-treated mice rescued the reduced expression of Bdnf                                                                                                                                                                                                     |
| Choi J et al. 2022 <sup>[34]</sup>             | C57BL/6J mice           | CRS-depression                | Probiotics | Lactobacillus, Bacillus, Akkermansia                       | Extracellular vesicles (EV) from <i>L. plantarum</i> , <i>Bacillus subtilis</i> , and <i>A. muciniphila</i>      | Lac-EV, Bac-EV, or Akk-EV were administered, each with 6 $\mu$ g in 100 $\mu$ l of injection volume, for 14 days                                                                                                                                                                                                                                                                                                      | Injection of EV isolated from culture media of <i>L. plantarum</i> , <i>Bacillus subtilis</i> and <i>A. muciniphila</i> are sufficient to ameliorate stress-induced depressive-like behavior | Injection of EV from the three selected probiotics restored the expression of McCP2, Sirt1, and/or neurotrophic factors in the hippocampus                                                                                                                                     |
| Daug $\acute{e}$ V et al. 2020 <sup>[35]</sup> | Fischer/Long Evans Rats | MD-depression                 | Probiotics | Lactobacillus, Bifidobacterium, Lactococcus, Streptococcus | <i>L. helveticus</i> LA 102, <i>B. longum</i> LA 101, <i>L. lactis</i> LA 103, and <i>S. thermophilus</i> LA 104 | Rats received 0.5 mL of the probiotics ( $1 \times 10^9$ CFU) by gavage with probes 5 days a week for 5 weeks for Fischer rats and 9 weeks for Long Evans rats (until euthanasia)                                                                                                                                                                                                                                     | A probiotic mixture induces anxiolytic- and antidepressive-Like effects                                                                                                                      | Probiotic mixture treatment changed the levels of certain metabolites, such as 21-deoxycortisol, and changed brain monoamines                                                                                                                                                  |
| Desbonnet L et al. 2010 <sup>[36]</sup>        | Sprague-Dawley rats     | MS-depression                 | Probiotics | Bifidobacterium                                            | <i>B. infantis</i> 35624                                                                                         | <i>B. infantis</i> 35624 was administered by dissolving a powdered preparation, containing a dose of $1 \times 10^{10}$ live bacterial cells, in 100 ml of the rats drinking water every morning from P50 to the day of sacrifice                                                                                                                                                                                     | <i>B. infantis</i> 35624 treatment alleviated depressive-like behaviors                                                                                                                      | Probiotic treatment resulted in normalization of the immune response and restoration of basal NA concentrations in the brainstem.                                                                                                                                              |
| Dhaliwal J et al. 2018 <sup>[37]</sup>         | Swiss albino LACA mice  | CUMS-depression SD-depression | Probiotics | Lactobacillus                                              | <i>L. plantarum</i> MTCC 9510                                                                                    | <i>L. plantarum</i> MTCC 9510 ( $2 \times 10^{10}$ CFU per mice) was supplemented to male Swiss albino mice either subjected to chronic unpredictable mild stress (28 days) or sleep deprivation stress (21 days)                                                                                                                                                                                                     | <i>L. plantarum</i> MTCC 9510 supplementation prevented stress-induced behavioural despair (depression, anxiety, learning and memory, stereotypic behaviour)                                 | <i>L. plantarum</i> MTCC 9510 supplementation prevented the oxidative stress and inflammatory response in brain and serum, and prevented intestinal permeability and selected gut microbial aberrations                                                                        |

|                                     |                     |                       |            |                                                               |                                                                                                                                                                                                                                     |                                                                                                                                                                                                                                                  |                                                                                                                                                             |                                                                                                                                                                                                                                        |
|-------------------------------------|---------------------|-----------------------|------------|---------------------------------------------------------------|-------------------------------------------------------------------------------------------------------------------------------------------------------------------------------------------------------------------------------------|--------------------------------------------------------------------------------------------------------------------------------------------------------------------------------------------------------------------------------------------------|-------------------------------------------------------------------------------------------------------------------------------------------------------------|----------------------------------------------------------------------------------------------------------------------------------------------------------------------------------------------------------------------------------------|
| Gao K et al. 2022 <sup>[36]</sup>   | BALB/c mice         | CUMS-depression       | Probiotics | Lactococcus                                                   | Lc. lactis strain WHH2078                                                                                                                                                                                                           | Orally administered with 200 $\mu$ L pre-warmed WHH2078 preparation ( $1 \times 10^9$ CFU/mL) for 5 consecutive weeks                                                                                                                            | Lc. lactis strain WHH2078 alleviated depressive and anxiety-like behaviors                                                                                  | Lc. lactis strain WHH2078 improved the 5-HT metabolism along the GBA and modulation of the gut microbiome composition                                                                                                                  |
| Gu F et al. 2020 <sup>[39]</sup>    | Sprague-Dawley rats | CUMS-depression       | Probiotics | Lactobacillus                                                 | L. casei                                                                                                                                                                                                                            | Administration with L. casei ( $8 \times 10^8$ CFU/kg/day) for 4 weeks from 4th to 7th week of CUMS                                                                                                                                              | L. casei treatment relieved the depressive-like behaviors of rats induced by CUMS                                                                           | L. casei treatment up-regulated the expression levels of monoamines 5-HT, DA and NE, activated the BDNF-TrkB signaling, inhibited the phosphorylation of EK1/2 and P38 in frontal cortex, and regulated the gut microbiota composition |
| Guida F et al. 2018 <sup>[40]</sup> | C57/bl6 mice        | Antibiotic-depression | Probiotics | Lactobacillus                                                 | L. casei DG                                                                                                                                                                                                                         | Oral gavage with the probiotic (L. casei DG, $10^9$ cells in saline, 100 $\mu$ l) up to 7 days.                                                                                                                                                  | L. casei treatment relieved the depressive-like behaviors induced by antibiotics                                                                            | Administration of L. casei adjusted gut inflammation, normalized the hippocampal BDNF-TrkB signaling, improved hippocampal and cortical electrophysiological neuronal activity, and reduced microglia and astrocyte activation         |
| Guo Y et al. 2019 <sup>[41]</sup>   | ICR mice            | CRS-depression        | Probiotics | Bifidobacterium                                               | B. adolescentis                                                                                                                                                                                                                     | Receiving 0.25 $\times 10^9$ CFU/kg B. adolescentis by gavage for 21 days                                                                                                                                                                        | B. adolescentis treatment prevented the development of anxiety- and depressive-like behaviors caused by CRS                                                 | B. adolescentis treatment are related to reducing inflammatory cytokines and rebalancing the gut microbiota                                                                                                                            |
| Han SK et al. 2019 <sup>[42]</sup>  | C57BL/6 mice        | IS-depression         | Probiotics | Lactobacillus, Bifidobacterium                                | L. mucosae NK41, B. longum NK46                                                                                                                                                                                                     | $1 \times 10^9$ CFU of NK41/mouse/day; $1 \times 10^9$ CFU of NK46/mouse/day; $1 \times 10^9$ CFU of NK41 and NK46 mixture (1:1) mix/mouse/day                                                                                                   | Oral administration of NK41, NK46, or their mixture synergistically alleviated immobilization stress-induced anxiety- and depressive-like behaviors in mice | Oral administration of NK41, NK46, or their mixture inhibited gut inflammation through the inhibition of gut bacterial LPS production, and prevented gut dysbiosis                                                                     |
| Han SK et al. 2020b <sup>[43]</sup> | C57BL/6 mice        | EC-depression         | Probiotics | Lactobacillus, Bifidobacterium                                | L. reuteri NK33, B. adolescentis NK98                                                                                                                                                                                               | $1 \times 10^9$ CFU/mouse/day of NK33; $1 \times 10^9$ CFU/mouse/day of NK98; EN1:1, $1 \times 10^9$ CFU/mouse/day of the NK33 and NK98 (1:1)(4:1)(9:1) mixture were orally gavaged once a day for 5 days from 24 h after the final K1 treatment | Oral gavage of NK33 and/or NK98 alleviated Escherichia coli K1-induced depression-like behaviors in mice                                                    | Oral gavage of NK33 and/or NK98 shifted Escherichia coli K1-induced gut microbiota alteration in mice                                                                                                                                  |
| Hao W et al. 2021 <sup>[44]</sup>   | C57BL/6 mice        | Antibiotic-depression | Probiotics | Bifidobacterium, Lactococcus, Lactobacillus and Streptococcus | Sixteen strains: B. longum, L. acidophilus, B. bifidum, B. breve, B. lactis, L. brevis, L. bulgaricus, L. casei, L. helveticus, L. plantarum, L. reuteri, L. rhamnosus, L. salivarius, Lc. lactis, S. thermophilus, and B. infantis | Receiving probiotics solution (0.15 ml/d) for 14 consecutive days                                                                                                                                                                                | Probiotics treatment mitigated antibiotic-induced anxiety- and depressive-like behaviors                                                                    | Probiotics treatment modulated the gut microbiota, corrected excessive LPS release, and inhibited the immoderate activation of the NLRP3 inflammasome in the colon                                                                     |

|                                         |                     |                                |            |                                |                                                     |                                                                                                                                                                                        |                                                                                                                                                                                |                                                                                                                                                                                                                                                                             |
|-----------------------------------------|---------------------|--------------------------------|------------|--------------------------------|-----------------------------------------------------|----------------------------------------------------------------------------------------------------------------------------------------------------------------------------------------|--------------------------------------------------------------------------------------------------------------------------------------------------------------------------------|-----------------------------------------------------------------------------------------------------------------------------------------------------------------------------------------------------------------------------------------------------------------------------|
| Hao Z et al. 2019 <sup>[45]</sup>       | Sprague-Dawley rats | CUMS-depression                | Probiotics | Faecalibacterium               | <i>F. prausnitzii</i> (ATCC 27766)                  | Rats were fed at the same time each day by oral gavaged with 200 $\mu$ L of resuspended <i>F. prausnitzii</i> , $1 \times 10^9$ CFU (from the eighth week to the eleventh week) daily. | Administration of <i>F. prausnitzii</i> had preventive and therapeutic effects on CUMS-induced depression-like and anxiety-like behavior                                       | <i>F. prausnitzii</i> administration led to higher levels of SCFAs in the cecum and higher levels of cytokines interleukin-10 (IL-10) in the plasma, prevented the effects on corticosterone, C-reaction protein and cytokines interleukin-6 (IL-6) release induced by CUMS |
| Huang F et al. 2021 <sup>[46]</sup>     | C57BL/6 mice        | Ovariectomy-depression         | Probiotics | Prevotella                     | <i>P. histicola</i> DSM19854                        | Receiving <i>P. histicola</i> (10 ml/kg) per second day for 12 weeks                                                                                                                   | <i>P. histicola</i> alleviated depressive behaviors caused by estrogen deficiency                                                                                              | <i>P. histicola</i> regulated disorder microbiota to attenuate central inflammation, which might be involved in TLR4/Myd88/JNK MAPK pathway (Figure 9) and further upregulate BDNF expression for hippocampal neurogenesis                                                  |
| Huang YY et al. 2022 <sup>[47]</sup>    | C57BL/6N mice       | DSS-depression                 | Probiotics | Lactobacillus                  | <i>L. plantarum</i> DMDL 9010 (LP9010)              | Mice administered orally with 0.2 mL/10 g weight per day LP9010 at a dose of $10^7$ CFU/mL and $10^9$ CFU/mL for 7 days                                                                | LP9010 intake lightened depression-like behavior                                                                                                                               | LP9010 promoted anti-inflammatory cytokines, reduced proinflammatory cytokines, enhanced SCFAs production, and reorganized the gut microbiome                                                                                                                               |
| Jang HM et al. 2019 <sup>[48]</sup>     | C57BL/6 mice        | IS-depression                  | Probiotics | Lactobacillus, Bifidobacterium | <i>L. reuteri</i> NK33, <i>B. adolescentis</i> NK98 | Orally gavaged NK3 or NK49 at a dose of $1 \times 10^9$ CFU/mouse/day for 5 days in IS-treated mice                                                                                    | Treatment with NK33 and/or NK98, which were orally gavaged in mice before or after IS treatment, significantly suppressed the occurrence and development of anxiety/depression | NK33 and NK98 synergistically regulated of gut immune responses (inhibited NF- $\kappa$ B activation, attenuated colitis and hippocampal inflammation) and microbiota composition                                                                                           |
| Kambe J et al. 2020 <sup>[49]</sup>     | C57BL/6J mice       | Healthy status                 | Probiotics | Enterococcus                   | Heat-killed <i>E. faecalis</i> strain EC-12 (EC-12) | The EC-12 group was fed on AIN-93 M diet with heat-killed EC-12 at a concentration of 0.125 % for 4 weeks                                                                              | EC-12 supplementation reduced anxiety- and depressive-like behaviors                                                                                                           | EC-12 supplementation regulated the gut microbiota                                                                                                                                                                                                                          |
| Karen C et al. 2021 <sup>[50]</sup>     | Wistar rats         | MS-depression                  | Probiotics | Lactobacillus                  | <i>L. paracasei</i> HT6                             | Supplementing with <i>L. paracasei</i> HT6 (per orally, p.o. by oral gavage; from PND-2 to 16)                                                                                         | <i>L. paracasei</i> supplementation prevented early life stress-induced anxiety and depressive-Like behavior                                                                   | <i>L. paracasei</i> supplementation potentially mediated stress hormones, neurotransmitters, and expression of miRNAs, glutamate receptors, and the microbiota-gut-brain axis                                                                                               |
| Kim JK et al. 2020 <sup>[51]</sup>      | C57BL/6J mice       | Escherichia coli K1-depression | Probiotics | Lactobacillus                  | <i>L. mucosae</i> NK41                              | Mice were orally gavaged with the NK41 ( $1 \times 10^9$ CFU/mouse/day) once a day for 5 days from 24 h after treatment with K1 suspension                                             | NK41 treatment reduced K1-induced cognitive decline and anxiety/depression                                                                                                     | The superiority of anti-inflammatory bacteria such as <i>L. mucosae</i> can alleviate psychiatric disorders with the attenuation of altered microbiota                                                                                                                      |
| Kochalska K et al. 2020 <sup>[52]</sup> | Wistar rats         | CUMS-depression                | Probiotics | Lactobacillus                  | <i>L. rhamnosus</i> JB-1                            | The JB-1 group was fed a microbiotic diet with LR-JB1 <sup>TM</sup> daily for 4 weeks                                                                                                  | Dietary supplement of LR-JB1 <sup>TM</sup> resulted in a reduction of stress-induced behavior in a rat model of depressive-like disorder                                       | A microbiotic diet with LR-JB1 <sup>TM</sup> brought improvements in neurochemical balance in the course of depressive-like disorder                                                                                                                                        |
| Kosuge A et al. 2021 <sup>[53]</sup>    | C57BL/6J mice       | CSDS-depression                | Probiotics | Bifidobacterium                | <i>B. breve</i> M-16V                               | M-16V-treated groups were fed the AIN-93G diet which containing $5.0 \times 10^9$ nonviable cells/0.5 g                                                                                | Heat-sterilized <i>B. breve</i> M-16V supplementation significantly prevented depressive-like behavior (social interaction impairment)                                         | Heat-sterilized <i>B. breve</i> M-16V supplementation suppressed CSDS-induced neuroinflammation and modulated the gut microbiota composition                                                                                                                                |

|                                              |                     |                        |            |                                |                                                  |                                                                                                                                                                                                                      |                                                                                                                     |                                                                                                                                                                                                                                   |
|----------------------------------------------|---------------------|------------------------|------------|--------------------------------|--------------------------------------------------|----------------------------------------------------------------------------------------------------------------------------------------------------------------------------------------------------------------------|---------------------------------------------------------------------------------------------------------------------|-----------------------------------------------------------------------------------------------------------------------------------------------------------------------------------------------------------------------------------|
| Li Q et al. 2021 <sup>[54]</sup>             | Sprague-Dawley rats | CUMS-depression        | Probiotics | Bifidobacterium, Lactobacillus | L. helveticus, L. rhamnosus, L. casei, B. longum | Giving 2 ml of probiotics at a concentration of $4 \times 10^8$ CFU/kg once daily for 4 weeks                                                                                                                        | Probiotics alleviated CUMS-induced depressive-like behaviors                                                        | Probiotics treatment remodeled intestinal flora, increased the monoamine neurotransmitters (norepinephrine and 5-hydroxytryptamine), and inhibited hypothalamic-pituitary-adrenal neuroendocrine system (ACTH and corticosterone) |
| Liang S et al. 2015 <sup>[55]</sup>          | Sprague-Dawley rats | CRS-depression         | Probiotics | Lactobacillus                  | L. helveticus NS8                                | The strain was resuspended in drinking water at a concentration of $10^9$ CFU/ml, and was administered for 26 days until the termination of the experiment                                                           | Treatment with probiotic L. helveticus NS8 had anxiolytic and antidepressant effects, promoted cognition            | Treatment with probiotic L. helveticus NS8 decreased plasma CORT and ACTH levels, modulated pro-inflammatory and anti-inflammatory balance, and restored 5-HT, NE, and BDNF content in the hippocampus                            |
| Liao JF et al. 2019 <sup>[56]</sup>          | C57BL/6J mice       | MS-depression          | Probiotics | Lactobacillus                  | L. paracasei PS23 (PS23)                         | The live (live cells of PS23 at $1 \times 10^9$ CFU/mouse/day) and heat-killed cells (heat-killed cells of PS23 at $1 \times 10^9$ cells/mouse/day) were administered by oral gavage for 4 weeks starting from PD 29 | L. paracasei PS23 alleviated stress, anxiety, and depressive traits in maternal separated mice                      | PS23 modulated stress responses via immunomodulatory effects along the dopaminergic systems of the brain, illustrating the potential of PS23 as a psychobiotic                                                                    |
| Lim EY et al. 2021 <sup>[57]</sup>           | Sprague Dawley rats | Ovariectomy-depression | Probiotics | Lactobacillus                  | L. intestinalis YT2                              | Treatment ( $10^9$ CFU/ml) started one week after surgery and lasted for 18 weeks                                                                                                                                    | Treatment with L. intestinalis YT2 significantly alleviated menopausal symptoms including depression-like behaviour | Administration of L. intestinalis YT2 restored the intestinal microbial composition, promoted gut barrier integrity by increasing the mRNA levels of tight junction-related markers                                               |
| Liu Y et al. 2020 <sup>[58]</sup>            | BALB/c mice         | Healthy status         | Probiotics | Lactobacillus                  | L. rhamnosus JB-1                                | The bacteria were delivered in drinking water at $1 \times 10^8$ CFU per day for 28 days prior to behavioural testing and continued throughout the testing period for a total of 39 days treatment                   | L. rhamnosus JB-1 treatment reduced depressive- and anxiety-like behavior                                           | CD4+CD25+ cells, most likely regulatory T cells, are both necessary and sufficient for L. rhamnosus JB-1 induced antidepressant and anxiolytic-like effects                                                                       |
| Liu YW et al. 2015 <sup>[59]</sup>           | C57BL/6J mice       | MS-depression          | Probiotics | Lactobacillus                  | L. plantarum PS128                               | Giving saline re-suspended PS128 daily ( $10^9$ CFU/mouse/day) by gavage for 4 weeks from PND 29 to 8 weeks old                                                                                                      | Chronic ingestion of PS128 could ameliorate anxiety- and depression-like behaviors                                  | PS128 reduced inflammatory cytokines and increased anti-inflammatory cytokines in the serum, and increased the dopamine level in the prefrontal cortex                                                                            |
| Maehata H et al. 2019 <sup>[60]</sup>        | C57BL/6J mice       | sCSDS-depression       | Probiotics | Lactobacillus                  | Heat-killed L. helveticus MCC1848                | Heat-killed MCC1848 was added to AIN93G at $3.3 \times 10^8$ organisms/g, resulting in the consumption of approximately $1.0 \times 10^8$ organisms/day for 24 days                                                  | MCC1848 improved anxiety- or depressive-like behaviors in sCSDS mice                                                | MCC1848 ameliorated sCSDS-induced gene expression alterations in signal transduction or nervous system development                                                                                                                |
| McVey Neufeld KA et al. 2018 <sup>[61]</sup> | BALB/c mice         | Healthy status         | Probiotics | Lactobacillus                  | L. rhamnosus JB-1                                | JB-1 was delivered via the drinking water at a dose of $10^8$ CFU/day for 28 days                                                                                                                                    | Feeding L. rhamnosus JB-1 to BALB/c mice reduced depressive-like behavior                                           | Feeding L. rhamnosus JB-1 to BALB/c mice attenuated plasma corticosterone and hastens recovery                                                                                                                                    |
| Moya-Pérez A et al. 2017 <sup>[62]</sup>     | C57BL/6J mice       | MS-depression          | Probiotics | Bifidobacterium                | B. pseudocatenulatum CECT 7765                   | Receiving a daily oral dose of $1 \times 10^8$ CFU B. pseudocatenulatum CECT 7765 from P2 until P21                                                                                                                  | B. pseudocatenulatum CECT 7765 treatment reduced MS-induced anxiety- and depressive-like behaviors in adulthood     | B. pseudocatenulatum CECT 7765 treatment modulated the consequences of chronic stress on the HPA response via modulation of the intestinal neurotransmitter, cytokine network, and gut microbiota composition                     |



|                                         |                                        |                                         |            |                                |                                                                                              |                                                                                                                                                                                                                                                        |                                                                                                                                         |                                                                                                                                                                                                                                        |
|-----------------------------------------|----------------------------------------|-----------------------------------------|------------|--------------------------------|----------------------------------------------------------------------------------------------|--------------------------------------------------------------------------------------------------------------------------------------------------------------------------------------------------------------------------------------------------------|-----------------------------------------------------------------------------------------------------------------------------------------|----------------------------------------------------------------------------------------------------------------------------------------------------------------------------------------------------------------------------------------|
| Murray E et al. 2019 <sup>[63]</sup>    | CD-1 mice                              | LPS-depression                          | Probiotics | Lactobacillus                  | <i>L. lactis</i> , <i>L. cremoris</i> , <i>L. diacetylactis</i> , <i>L. acidophilus</i>      | 5 g of dry kefir probiotic culture ( $3.0 \times 10^8$ CFU/g) into 1L of skim milk, mice had <i>ad libitum</i> access to kefir                                                                                                                         | Probiotic consumption during puberty protected against LPS-induced depression- and anxiety-like behaviors in adulthood                  | Probiotic consumption during puberty mitigated inflammation, and prevented LPS-induced changes to the gut microbiome                                                                                                                   |
| Natale NR et al. 2021 <sup>[64]</sup>   | Long-Evans rats                        | CUS-depression                          | Probiotics | Lactobacillus                  | <i>L. helveticus</i> R0052, <i>L. rhamnosus</i> R0011                                        | The PB-infused water was prepared by rehydrating 2.87 g of powder (mixed with maltodextrin and milk powder) in 75 mL of distilled water for a final concentration of $10^8$ CFU/ml for 2 weeks                                                         | Probiotics prevented the anxiety and depressive behavior                                                                                | Probiotics reduced microglia immunoreactivity in the basolateral amygdala, possibly indicating a neuroprotective effect of PB supplements in this rodent model                                                                         |
| Partrick KA et al. 2021 <sup>[65]</sup> | Syrian hamsters (Mesocricetus auratus) | CSDS-depression                         | Probiotics | Lactobacillus, Bifidobacterium | <i>L. helveticus</i> R0052, <i>B. longum</i> R0175                                           | Probiotic at a low dose of $10^8$ CUF per day, or probiotic high dose of $10^{10}$ CUF per day for 14 days                                                                                                                                             | Surprisingly, probiotic administration at the low dose significantly increased social avoidance and decreased social interaction        | Probiotic administration altered gut microbial composition and promoted an anti-inflammatory profile                                                                                                                                   |
| Patterson E et al. 2019 <sup>[66]</sup> | C57BL/6J mice                          | HFD-depression                          | Probiotics | Lactobacillus                  | <i>L. brevis</i> DPC6108, <i>L. brevis</i> DSM32386                                          | Water containing either <i>L. brevis</i> DPC6108 ( $1 \times 10^{10}$ CFU/day) or <i>L. brevis</i> DSM32386 ( $1 \times 10^{10}$ CFU/day) was supplied to the mice in these groups for the 12 week intervention period and bottles were replaced daily | Probiotics treatment improved depression-like behaviour                                                                                 | Probiotics treatment improved metabolic syndrome in mice (reduced the accumulation of mesenteric adipose tissue, increased insulin secretion, improved plasma cholesterol clearance and reduced basal corticosterone)                  |
| Qiu X et al. 2021 <sup>[67]</sup>       | C57BL/6J mice                          | LPS-depression                          | Probiotics | Lactobacillus                  | <i>L. delbrueckii</i>                                                                        | Giving $10^8$ CFU Lac intragastrically daily for 7 days                                                                                                                                                                                                | <i>L. delbrueckii</i> treatment effectively inhibited the occurrence of depressive-like behavior                                        | <i>L. delbrueckii</i> treatment inhibited intestinal inflammation and subsequent neuroinflammation (through inhibiting toll-like receptor 4 (TLR4) signaling), and microbiota dysbiosis                                                |
| Ramalho JB et al. 2019 <sup>[68]</sup>  | C57BL/6 mice                           | Healthy status                          | Probiotics | Lactococcus                    | <i>Lc. lactis</i> subsp. <i>cremoris</i> LL95                                                | Female C57BL/6 mice received LL95 orally at a dose of $10^8$ UFC/day for 28 days                                                                                                                                                                       | Oral supplementation of <i>L. lactis</i> LL95 improved depressive- and anxiety-like behaviour                                           | Oral supplementation of <i>L. lactis</i> LL95 improved the antioxidant parameters in the hippocampus, and increased the faecal contents of lactic acid bacteria                                                                        |
| Ramalho JB et al. 2022 <sup>[69]</sup>  | C57BL/6 mice                           | LPS-depression                          | Probiotics | Lactococcus                    | <i>Lc. lactis</i> subsp. <i>cremoris</i> LL95                                                | Oral administration of LL95 for one week with a daily oral dose of $1 \times 10^8$ CFU/100 $\mu$ L.                                                                                                                                                    | LL95 intervention improved LPS-induced depression-like behaviors in mice                                                                | LL95 intervention modulated the oxidative status and pro-inflammatory cytokine expression in the hippocampus and alteration in the LAB content of the gut microbiota                                                                   |
| Sandes S et al. 2020 <sup>[70]</sup>    | C57BL/6J mice                          | CRS-depression                          | Probiotics | Weissella                      | <i>W. paramesenteroides</i> WpK4                                                             | Mice were pretreated, receiving $10^8$ CFU of <i>W. paramesenteroides</i> WpK4 during 10 days, followed by 21 days of challenge, being restrained daily                                                                                                | Bacterial consumption was associated with a reduced anxiety-like and depressive-like behaviors                                          | <i>W. paramesenteroides</i> WpK4 exerted their beneficial roles in gut-brain axis through their immunomodulatory effects with consequences in several metabolic pathways related to intestinal permeability and hippocampal physiology |
| Savignac HM et al. 2014 <sup>[71]</sup> | BALB/c mice                            | -                                       | Probiotics | Bifidobacterium                | <i>B. longum</i> 1714, <i>B. breve</i> 1205                                                  | Bacteria were daily reconstituted in sterile phosphate buffered saline (PBS) to a final concentration of $1 \times 10^8$ CFU/mL ingested by mice for 6 weeks                                                                                           | Both Bifidobacteria reduced anxiety and <i>B. longum</i> 1714 induced antidepressant-like behavior                                      | -                                                                                                                                                                                                                                      |
| Silva LC et al. 2021 <sup>[72]</sup>    | Swiss Webster mice                     | Light-dark box and tail suspension test | Probiotics | Saccharomyces, Lactobacillus   | <i>S. cerevisiae</i> var boulardii 17, <i>L. paracasei</i> DTA 81, <i>S. cerevisiae</i> S-04 | Daily treated with probiotic-containing functional wheat beer (PWB) or probiotic-containing functional sour beer (PSB) (100 $\mu$ L) for 7 days                                                                                                        | <i>S. boulardii</i> 17 and <i>L. paracasei</i> DTA 81 withstood at sufficient doses to promote antidepressant effects in the mice group | -                                                                                                                                                                                                                                      |

|                                            |               |                        |            |                                |                                                                                                                                                                                                                                                                                                             |                                                                                                                                                                                                     |                                                                                                                                                                                                    |                                                                                                                                                                                   |
|--------------------------------------------|---------------|------------------------|------------|--------------------------------|-------------------------------------------------------------------------------------------------------------------------------------------------------------------------------------------------------------------------------------------------------------------------------------------------------------|-----------------------------------------------------------------------------------------------------------------------------------------------------------------------------------------------------|----------------------------------------------------------------------------------------------------------------------------------------------------------------------------------------------------|-----------------------------------------------------------------------------------------------------------------------------------------------------------------------------------|
| Soltanmoradi H et al. 2021 <sup>[73]</sup> | BALB/c mice   |                        | Probiotics | Lactobacillus                  | L. rhamnosus GG, and kefir, a probiotic supplement                                                                                                                                                                                                                                                          | –                                                                                                                                                                                                   | Kefir, L. rhamnosus GG, and the investigated probiotic supplement have antidepressant-like properties                                                                                              | –                                                                                                                                                                                 |
| Sovijit WN et al. 2019 <sup>[74]</sup>     | C57BL/6J mice | Ovariectomy-depression | Probiotics | Lactobacillus                  | L. reuteri                                                                                                                                                                                                                                                                                                  | Feeding with food pellets that were pulverized in a blender and kneaded with L. reuteri (2 billion CFU/mouse/day) at 10 weeks of age, and lasting for 2 weeks                                       | L. reuteri supplementation improves depressive behaviors in OVX mice                                                                                                                               | Supplementation of L. reuteri upregulated hippocampal brain-derived neurotrophic factor (BDNF) gene expression                                                                    |
| Stenman LK et al. 2020 <sup>[75]</sup>     | Swiss mice    | CRS-depression         | Probiotics | Bifidobacterium, Lactobacillus | 12 candidate probiotics: B. longum BG0014, B. longum ssp. infantis B111471, B. animalis BL0005, B. animalis ssp. lactis 420, L. paracasei Lpc-37, L. salivarius Ls-33, L. plantarum LP12418, L. plantarum LP12151, L. plantarum LP12407, L. acidophilus LA11873, L. rhamnosus LX11881, L. helveticus LH0138 | Mice were administered a daily oral gavage containing $1 \times 10^8$ CFU of selected candidate probiotic solution for one week prior to and for three weeks during daily chronic restraint stress. | Of the twelve candidate probiotics, L. paracasei Lpc-37, L. plantarum LP12407, L. plantarum LP12418 and L. plantarum LP12151 prevented stress-associated anxiety and depression-related behaviours | Each of these strains had a unique profile in terms of mechanistic biomarkers related to the HPA axis and prefrontal cortex GABA receptor expression                              |
| Sun J et al. 2018 <sup>[76]</sup>          | C57BL/6 mice  | CUMS-depression        | Probiotics | Clostridium                    | C. butyricum WZMC1018                                                                                                                                                                                                                                                                                       | The bacterial solution was prepared every day in sterile milk and treated orally at a concentration of $5 \times 10^8$ CFU/0.5 mL/day/mice for 28 consecutive days.                                 | C. butyricum WZMC1018 treatment effectively improved depressive-like behavior                                                                                                                      | C. butyricum WZMC1018 treatment stimulated the GLP-1 secretion and increased the 5-HT and BDNF through the gut-brain axis                                                         |
| Sun X et al. 2021 <sup>[77]</sup>          | C57BL/6 mice  | CRS-depression         | Probiotics | Lactobacillus                  | L. plantarum WLPL04                                                                                                                                                                                                                                                                                         | The final concentration of the L. plantarum WLPL04 in drinking water was $10^8$ CFU/mL for 28 days                                                                                                  | L. plantarum WLPL04 treatment alleviated CRS-induced anxiety/depressive-like behaviors and cognitive deficits                                                                                      | L. plantarum WLPL04 treatment reversed the abnormal change in intestinal microbiota, and alleviated the reduced levels of 5-HT, BDNF, and TrkB induced by CRS in mice             |
| Sun Y et al. 2019 <sup>[78]</sup>          | Kunming mice  | CUMS-depression        | Probiotics | Lactobacillus                  | L. kefirifaciens ZW3                                                                                                                                                                                                                                                                                        | Treated with L. kefirifaciens ZW3 at different doses ( $10^7$ CFU, $10^8$ CFU, $10^9$ CFU)/mouse/day for 6 weeks                                                                                    | Supplementation with Lactobacillus kefirifaciens ZW3 improved depressive-like behavior                                                                                                             | L. kefirifaciens ZW3 regulated disorder of tryptophan metabolism, protected the HPA axis, inhibited inflammation, and reshaped the structure of the gut microbiota caused by CUMS |
| Takahashi K et al. 2019 <sup>[79]</sup>    | ddY mice      | DSS-depression         | Probiotics | Enterococcus                   | E. faecalis 2001 (EF-2001)                                                                                                                                                                                                                                                                                  | EF-2001 was administered orally (250mg/kg per os [p.o.]) from 14 days before the beginning of DSS                                                                                                   | EF-2001 attenuated IBD-like symptoms and depressive-like behavior in DSS-treated mice                                                                                                              | EF-2001 decreased rectal and hippocampal inflammatory cytokines and facilitated the NFκB p65/XIAP pathway in the hippocampus                                                      |

|                                         |               |                                    |            |                                             |                                                                                                                                                                                                                                                                                                                          |                                                                                                                                                                                                                                                |                                                                                                 |                                                                                                                                                                                                                                                                                     |
|-----------------------------------------|---------------|------------------------------------|------------|---------------------------------------------|--------------------------------------------------------------------------------------------------------------------------------------------------------------------------------------------------------------------------------------------------------------------------------------------------------------------------|------------------------------------------------------------------------------------------------------------------------------------------------------------------------------------------------------------------------------------------------|-------------------------------------------------------------------------------------------------|-------------------------------------------------------------------------------------------------------------------------------------------------------------------------------------------------------------------------------------------------------------------------------------|
|                                         |               |                                    |            |                                             |                                                                                                                                                                                                                                                                                                                          | administration until the day prior to the last DSS treatment for 20 days                                                                                                                                                                       |                                                                                                 |                                                                                                                                                                                                                                                                                     |
| Takahashi K et al. 2022 <sup>[60]</sup> | ddY mice      | Olfactory bulbectomized-depression | Probiotics | Enterococcus                                | E. faecalis 2001 (EF-2001)                                                                                                                                                                                                                                                                                               | EF-2001 (250 mg/kg) was dissolved in drinking water and administered orally (per os [p.o.]) once a day in a volume of 0.1 mL/10 g mouse body weight using a 1 mL syringe with an oral probe, from 6 days before the OBX operation for 28 days. | EF-2001 administration prevented depressive-like behaviors                                      | EF-2001 administration regulated prefrontal cortical myelination via the enhancement of CREB/BDNF and NFκB p65/LIF/STAT3 pathways                                                                                                                                                   |
| Tian P et al. 2019a <sup>[61]</sup>     | C57BL/6J mice | CUMS-depression                    | Probiotics | Bifidobacterium                             | B. longum subspecies infantis strain CCFM687                                                                                                                                                                                                                                                                             | Lyophilized bacteria powder was re-suspended in 10% skimmed milk solution, and administered at a dose of 10 <sup>9</sup> CFU/mL viable bacteria for 6 weeks                                                                                    | B. longum subsp. infantis strain CCFM687 showed a good anti-depressive effect                   | B. longum subsp. infantis strain CCFM687 increased the 5-hydroxytryptamine, serotonin and BDNF, alleviated the hyperactivity of the hypothalamic-pituitary-adrenal (HPA) axis response and accordingly reversed the peripheral inflammation status, and reshaped the gut microbiome |
| Tian P et al. 2019b <sup>[62]</sup>     | C57BL/6J mice | CUMS-depression                    | Probiotics | Bifidobacterium                             | B. longum subsp. infantis E41, B. breve M2CF22M7                                                                                                                                                                                                                                                                         | Lactic acid bacteria treatment group was gavaged at a dose of 10 <sup>9</sup> CFU/mL body weight daily for 5 weeks                                                                                                                             | Administration of several Lactic acid bacteria strains alleviated depressive behaviors of mice  | Lactic acid bacteria strains alleviated depression possibly via a 5-HTP-dependent mechanism, gut microbiota structure modulation                                                                                                                                                    |
| Tian P et al. 2020 <sup>[63]</sup>      | C57BL/6J mice | CUMS-depression                    | Probiotics | Bifidobacterium                             | B. breve CCFM1025                                                                                                                                                                                                                                                                                                        | The CCFM1025 treatment group was gavaged at a volume of 0.1 mL/10g (10 <sup>9</sup> CFU/mL) body weight daily for 6 weeks                                                                                                                      | CCFM1025 treatment significantly reduced depression- and anxiety-like behaviors                 | CCFM1025 treatment significantly alleviated hyperactive hypothalamic-pituitary-adrenal response, as well as inflammation, down-regulated the pCREB-c-Fos pathway, increased BDNF, SCFA and 5-HTP, and restored gut microbial abnormalities                                          |
| Tian P et al. 2021a <sup>[64]</sup>     | C57BL/6J mice | UCMS-depression                    | Probiotics | Lactobacillus, Bifidobacterium, Pediococcus | 30 strains: B. adolescentis, 3 strains of B. breve, 4 strains of B. bifidum, 2 strains of B. longum subsp. infantis, 5 strains of B. longum subsp. Longum, 4 strains of B. longum, 3 strains of L. fermentum, 2 strains of L. helveticus, 3 strains of L. plantarum, 2 strains of L. rhamnosus, Pediococcus acidilactici | Giving viable bacteria (10 <sup>9</sup> CFU/day) by oral gavage via 10% skim milk for 6 weeks                                                                                                                                                  | 16 strains show anti-depression and anti-anxiety like effect in at least three behavioral tests | Intestinal 5-HTP supplementary on the biosynthesis of brain serotonin is the possible mechanism of the candidate probiotics                                                                                                                                                         |

|                                        |                                                              |                                           |            |                                             |                                                                                                                                                                                                                                                                         |                                                                                                                                                                                                                   |                                                                                                          |                                                                                                                                                                                                                                                                       |
|----------------------------------------|--------------------------------------------------------------|-------------------------------------------|------------|---------------------------------------------|-------------------------------------------------------------------------------------------------------------------------------------------------------------------------------------------------------------------------------------------------------------------------|-------------------------------------------------------------------------------------------------------------------------------------------------------------------------------------------------------------------|----------------------------------------------------------------------------------------------------------|-----------------------------------------------------------------------------------------------------------------------------------------------------------------------------------------------------------------------------------------------------------------------|
| Tian P et al. 2021b <sup>[85]</sup>    | C57BL/6 mice                                                 | CUMS-depression                           | Probiotics | Bifidobacterium                             | B. breve CCFM1025 and FHLJDQ3M5                                                                                                                                                                                                                                         | Probiotic treatment persisted for 6 weeks by daily oral gavage. Lyophilized bacteria powder were re-suspended in 10% skim cow milk and administered at a dose of 10 <sup>9</sup> CFU/mL viable bacteria.          | CCFM1025 significantly decreases the chronically stressed mice's depressive-like behaviors               | CCFM1025 altered genomic and metabolic features involving glycoside hydrolases and neuromodulatory metabolites                                                                                                                                                        |
| Tian T et al. 2019 <sup>[86]</sup>     | C57BL/6 mice                                                 | CSDS-depression                           | Probiotics | Clostridium                                 | C. butyricum Miyairi 588 (CBM588)                                                                                                                                                                                                                                       | SPF mice were provided sterile water containing Miyairi 588 (>5 × 10 <sup>6</sup> CFU) for 4 weeks ad libitum                                                                                                     | CBM588 pre-feeding attenuates social avoidance and depressive-like behaviours in CSDS mice               | CBM588 may be involved in the regulation of microglia-mediated immune responses in the brain, and regulated gut microbiota composition                                                                                                                                |
| Tillmann S et al. 2019 <sup>[87]</sup> | Flinders Sensitive Line rats<br>Flinders resistant line rats | FSL-depression                            | Probiotics | Bifidobacterium, Lactobacillus, Lactococcus | Ecologic® Barrier + 4: B. breve W25, B. longum W108, L. helveticus W74, and L. rhamnosus W71<br>Ecologic® Barrier: B. bifidum W23, B. lactis W51, B. lactis W52, L. acidophilus W37, L. brevis W63, L. casei W56, L. salivarius W24, Lc. lactis W19, and Lc. lactis W58 | Rats received a daily dose of 5 × 10 <sup>9</sup> CFU/2 g for Ecologic® Barrier and a daily dose of 5 × 10 <sup>9</sup> CFU/1.25 g for Ecologic® Barrier + 4, administered in water bottles at a volume of 60 mL. | Probiotics exhibited risk-reducing properties (depressive-related behavior)                              | -                                                                                                                                                                                                                                                                     |
| Trudeau F et al. 2019 <sup>[88]</sup>  | Sprague-Dawley rats                                          | Post-myocardial infarction-depression     | Probiotics | Lactobacillus, Bifidobacterium              | L. helveticus R0052; B. longum R0175; L. salivarius HA-118                                                                                                                                                                                                              | Each rat in the probiotic groups received a daily dose of 10 <sup>9</sup> CFU for 14 days                                                                                                                         | B. longum mitigated the depressive-like symptoms                                                         | B. longum reduced the Caspase-3 activity and plasma C-reactive protein concentrations in the lateral and medial amygdala                                                                                                                                              |
| Wang P et al. 2021 <sup>[89]</sup>     | C57BL/6J mice                                                | Antibiotic-depression                     | Probiotics | Bifidobacterium, Lactobacillus              | Unspecific                                                                                                                                                                                                                                                              | Probiotics (Live Combined Bifidobacterium and Lactobacillus Tablets, Inner Mongolia Shuang Qi Pharmaceutical Co., Ltd. PRC, Inner Mongolia, China) for another 2 weeks                                            | Probiotics treatment alleviated anxiety behaviors, depressive-like behaviors and recognitive performance | Probiotics treatment improved neuronal activation in different brain regions, characterized by increased expression of Fos protein                                                                                                                                    |
| Wang S et al. 2020a <sup>[90]</sup>    | C57BL/6 mice                                                 | FMT CSDS-depression<br>Microbe-depression | Probiotics | Lactobacillus                               | L. intestinalis, L. reuteri                                                                                                                                                                                                                                             | Mice were orally administered water containing the microbes (approximately 1 × 10 <sup>8</sup> CFU/day) for 14 days (days 15–28) using gastric gavage                                                             | Ingestion of L. intestinalis and L. reuteri causes depression- and anhedonia-like phenotypes             | Ingestion of L. intestinalis and L. reuteri caused biochemical abnormalities in antibiotic-treated mice via the subdiaphragmatic vagus nerve                                                                                                                          |
| Wei CL et al. 2019 <sup>[91]</sup>     | C57BL/6J mice                                                | Corticosterone-depression                 | Probiotics | Lactobacillus                               | Live and heat-killed L. paracasei PS23                                                                                                                                                                                                                                  | The L-PS23 group received a daily oral gavage of L-PS23 (108 cells/0.2 ml/day) from days 1 to 41, and the H-PS23 group received a daily gavage of H-PS23 at the same dose and duration.                           | PS23 reverses corticosterone treatment-induced anxiety-like and depression-like behaviors                | The effects of chronic PS23 treatment are due to (1) increases in the hippocampal GR, MR, and BDNF proteins; (2) increases in serotonergic and dopaminergic activities in the hippocampus, prefrontal cortex, and striatum; and (3) improvement of the gut microbiota |

|                                        |                     |                                               |            |                                |                                                                                                                                                                                   |                                                                                                                                                                                                                              |                                                                                                                               |                                                                                                                                                                                                                                      |
|----------------------------------------|---------------------|-----------------------------------------------|------------|--------------------------------|-----------------------------------------------------------------------------------------------------------------------------------------------------------------------------------|------------------------------------------------------------------------------------------------------------------------------------------------------------------------------------------------------------------------------|-------------------------------------------------------------------------------------------------------------------------------|--------------------------------------------------------------------------------------------------------------------------------------------------------------------------------------------------------------------------------------|
| Xie R et al. 2020 <sup>[92]</sup>      | C57BL/6 mice        | CSDS-depression                               | Probiotics | Lactobacillus                  | <i>L. reuteri</i> 3                                                                                                                                                               | Treating for 4 weeks with <i>L. reuteri</i> 3 ( $10^{10}$ CFU/ml of per mouse in 0.1 ml phosphate-buffered saline [PBS]) after 10 days of CSDS                                                                               | Treatment with <i>L. reuteri</i> 3 ameliorated depressive-like behaviors                                                      | Treatment with <i>L. reuteri</i> 3 regulated the gut microbiota, SCFAs, and serotonin metabolism                                                                                                                                     |
| Xu J et al. 2022 <sup>[93]</sup>       | C57BL/6 mice        | CUMS-depression                               | Probiotics | Lactobacillus                  | <i>L. rhamnosus</i> zz-1                                                                                                                                                          | Mice received <i>L. rhamnosus</i> zz-1 at a dose of $2 \times 10^8$ CFU per kg bw, $2 \times 10^8$ CFU per kg bw or $2 \times 10^7$ CFU per kg bw for 6 weeks. The volume of the daily gavage liquid was adjusted to 0.1 mL. | <i>L. rhamnosus</i> zz-1 intervention ameliorated CUMS-induced depression-like behaviors                                      | <i>L. rhamnosus</i> zz-1 improved stress-induced physiological problems in model mice, including HPA axis hyperactivity, neurotransmitter deficiency, and impairments in the BDNF-TrkB signaling, and regulated gut microbiota       |
| Xu M et al. 2022 <sup>[94]</sup>       | C57BL/6J mice       | CUS-depression                                | Probiotics | Lactobacillus                  | <i>L. paracasei</i> 126L6, CCFM1229, 29L1, 4L3, <i>L. helveticus</i> 132M1, 8G3, Q7M66, 10M6, <i>L. rhamnosus</i> CCFM1131, CCFM1130, CCFM1228, <i>L. reuteri</i> CCFM1132, 11M59 | The freeze-dried bacterial powder was suspended in sterile skimmed milk. The concentration of surviving bacteria was $5 \times 10^8$ CFU/mL. The gavage volume of each mouse is 200 $\mu$ L for 6 weeks                      | <i>L. paracasei</i> CCFM1229 and <i>L. rhamnosus</i> CCFM1228 significantly reduced anxiety- and depression-related behaviour | The strains CCFM1229 and CCFM1228 regulated the gut microbiota and xanthine oxidase activity in the brain                                                                                                                            |
| Yang Y et al. 2022 <sup>[95]</sup>     | Sprague-Dawley rats | MS-postpartum depression                      | Probiotics | Lactobacillus                  | <i>L. casei</i>                                                                                                                                                                   | From postnatal day 2 to day 28, rats were gavage-fed with <i>Lactobacillus casei</i> ( $8 \times 10^8$ CFU/kg/day)                                                                                                           | Administration of <i>L. casei</i> improved depressive-like behaviors                                                          | Administration of <i>L. casei</i> altered gut microbiota composition, brain monoamines and oxidative stress, which may be associated with the regulation of the BDNF-ERK1/2 pathway                                                  |
| Yun SW et al. 2020 <sup>[96]</sup>     | C57BL/6J mice       | EC-depression                                 | Probiotics | Lactobacillus                  | <i>L. gasseri</i> NK109                                                                                                                                                           | NK109 at a dosage of $1 \times 10^8$ CFUs/mouse/day was orally gavage once a day for 5 days in the mice with <i>Escherichia coli</i> K1 ( $1 \times 10^8$ CFUs/mouse/day)-induced depression                                 | NK109 significantly alleviated <i>Escherichia coli</i> K1-induced cognitive impairment- and depression-like behaviors         | NK109 regulated the immune response through NF- $\kappa$ B-involved BDNF expression, IL-1 $\beta$ expression, and vagus nerve-mediated gut-brain signaling, and mitigated <i>Escherichia coli</i> -induced colitis and gut dysbiosis |
| Yun SW et al. 2021 <sup>[97]</sup>     | C57BL/6J mice       | EC-depression                                 | Probiotics | Lactobacillus                  | <i>L. paracasei</i> NK112                                                                                                                                                         | Receiving NK112 ( $1 \times 10^8$ CFU/mouse/day) daily for 5 days                                                                                                                                                            | Oral gavage of NK112 significantly alleviated K1-induced anxious, depressive, and memory-impaired behaviours                  | NK112 treatment suppressed IL-6, TNF- $\alpha$ , and BDNF expression through the regulation of gut microbiota and NF- $\kappa$ B activation                                                                                          |
| Yunes RA et al. 2020 <sup>[98]</sup>   | BALB/c mice         | Healthy status                                | Probiotics | Lactobacillus, Bifidobacterium | <i>L. plantarum</i> 90sk, <i>B. adolescentis</i> 150                                                                                                                              | One dose (0.5 ml) of the mixture of strains contained $10^8$ CFU <i>L. plantarum</i> 90sk and $10^7$ CFU <i>B. adolescentis</i> 150 for 14 days                                                                              | Administration of the probiotic composition decreased the duration of immobility of mice                                      | -                                                                                                                                                                                                                                    |
| Zhao Y et al. 2020 <sup>[99]</sup>     | Sprague-Dawley rats | Corticosterone-depression                     | Probiotics | Lactobacillus                  | <i>Lactobacillus plantarum</i> DP189                                                                                                                                              | Administration of DP189 ( $1.0 \times 10^9$ CFU/d) suspension by gavage for 21 days                                                                                                                                          | <i>L. plantarum</i> DP189 treatment prevented and/or alleviated depression-like behaviors                                     | <i>L. plantarum</i> DP189 treatment increased neurotransmitters in brain tissue, reduced serum levels of inflammatory factors, and regulated hippocampal neural apoptosis                                                            |
| Burokas A et al. 2017 <sup>[100]</sup> | C57BL/6J mice       | Prebiotics-anti-depression<br>CSDS-depression | Prebiotics | -                              | Fructo-oligosaccharides (FOS), Galacto-oligosaccharides (GOS)                                                                                                                     | Administering the prebiotics FOS, GOS, a combination of FOS and GOS (dissolved in drinking water for 0.3-0.4 g/mouse/day) for 3 weeks                                                                                        | FOS+GOS administration significantly improved the depressive- and anxiety-like behaviors                                      | Prebiotic administration significantly decreased the hypothalamic-pituitary-adrenal axis (corticosterone levels), influenced hippocampal and hypothalamic gene expression,                                                           |

|                                        |                     |                             |            |   |                                                                                                                          |                                                                                                                                                                                                          |                                                                                                                   |                                                                                                                                                                                                                                                                |
|----------------------------------------|---------------------|-----------------------------|------------|---|--------------------------------------------------------------------------------------------------------------------------|----------------------------------------------------------------------------------------------------------------------------------------------------------------------------------------------------------|-------------------------------------------------------------------------------------------------------------------|----------------------------------------------------------------------------------------------------------------------------------------------------------------------------------------------------------------------------------------------------------------|
|                                        |                     |                             |            |   |                                                                                                                          |                                                                                                                                                                                                          |                                                                                                                   | improved the tryptophan and monoamines metabolism, and normalized the effects of stress on the microbiota                                                                                                                                                      |
| Chen Y et al. 2021a <sup>[101]</sup>   | C57BL/6 mice        | CUMS-depression             | Prebiotics | – | Partially hydrolyzed guar gum (PHGG)                                                                                     | After 28 days of CUMS, mice received 600 mg/kg PHGG                                                                                                                                                      | PHGG significantly inhibited the loss of body weight, and prevented CUMS-induced depressive-like behavior in mice | PHGG modulated the gut microbiota structure and then increased the levels of short-chain fatty acids in mice feces and the levels of 5-hydroxytryptamine and dopamine in serum, striatum, and hippocampus                                                      |
| Cheng D et al. 2018 <sup>[102]</sup>   | Sprague-Dawley rats | Hydrocortisone-depression   | Prebiotics | – | Tiansi Liquid                                                                                                            | The dose of Tiansi Liquid was 0.45 g/kg once a day for 21 days                                                                                                                                           | Tiansi Liquid ameliorated depressive symptoms in rats                                                             | Tiansi Liquid modulated the gut microbiota composition and metabolites in the tryptophan-kynurenine pathway                                                                                                                                                    |
| Chi L et al. 2020 <sup>[103]</sup>     | Sprague-Dawley rats | CUMS-depression             | Prebiotics | – | Fructo-oligosaccharides (FOS)                                                                                            | Administration with FOS (50 mg/kg) via oral gavage for 3 weeks from the fifth week onward                                                                                                                | FOS administration alleviated depressive-like behaviors                                                           | FOS administration repaired intestinal epithelia damages, decreased the hypothalamic-pituitary-adrenal axis (corticosterone levels ), and modified the gut microbiota                                                                                          |
| Davis DJ et al. 2017 <sup>[104]</sup>  | C57BL/6J mice       | Social isolation-depression | Prebiotics | – | N-3 polyunsaturated fatty acid docosahexaenoic acid (DHA)                                                                | The mice were then treated with either 0.1% by weight or 1.0% by weight DHA                                                                                                                              | A DHA diet, regardless of dose, exhibited reduced anxiety and depressive-like behaviors only in male mice         | DHA altered the commensal community composition                                                                                                                                                                                                                |
| Donoso F et al. 2020 <sup>[105]</sup>  | Sprague-Dawley rats | MS-depression               | Prebiotics | – | Polyphenols: phlorotannins, xanthohumol, quercetin                                                                       | Dietary intervention of polyphenols (Phlorotannins 0.03%; Xanthohumol 0.015%; Quercetin 0.03%), delivered ad libitum in food, began once the animals were eight weeks old and continued for eight weeks. | Polyphenols reversed MS-induced depressive- and anxiety-like behaviours                                           | Polyphenols treatment prevented exacerbated production of corticosterone after acute stress in MS animals, reversed MS-induced plasma BDNF depletion and changes in diversity                                                                                  |
| Egerton S et al. 2020 <sup>[106]</sup> | Sprague-Dawley rats | MS-depression               | Prebiotics | – | Fish oil (containing polyunsaturated fatty acid)                                                                         | Fish oil (composition fatty acid profile and vitamins & minerals ) was added to the diets in the place of soybean oil in the standard chow, at 7% of total feed from 9 to 16 weeks of age                | Fish oil dietary supplementation partly prevented the depressive-like behaviours                                  | Fish oil dietary supplementation altered brain fatty acids, significantly decreased plasma corticosterone levels and reduced brain stem serotonin turnover, and regulated the gut microbial composition                                                        |
| Fan L et al. 2021 <sup>[107]</sup>     | Sprague-Dawley rats | CUMS-depression             | Prebiotics | – | Cistanche tubulosa extracts: total glycosides, Cistanche tubulosa aqueous extract, phenylethanoid and iridoid glycosides | Receiving different dose of extracts for 4 weeks                                                                                                                                                         | Cistanche tubulosa extracts prevented the depressive-like behaviours                                              | Cistanche tubulosa extracts regulated the hyperactivation of the HPA axis, severe peripheral and neural inflammation, and deficiencies in 5-HT and BDNF in the hippocampus                                                                                     |
| Gao X et al. 2020 <sup>[108]</sup>     | Sprague-Dawley rats | CUMS-depression             | Prebiotics | – | Triterpenoids extracts from Poria cocos (TPC)                                                                            | Receiving TPC at 15 g herb/kg 30 min before stressing exposure lasting 28 days                                                                                                                           | TPC significantly ameliorated depression-like behaviors in CUMS rats                                              | TPC treatment restored the level of the neurotrophic factor system and regulated the gut microbiota composition, and regulated metabolic system, including primary bile acid biosynthesis, taurine and hypotaurine metabolism, arginine and proline metabolism |
| Gong MJ et al. 2016 <sup>[109]</sup>   | Sprague-Dawley rats | Corticosterone-depression   | Prebiotics | – | Icariin                                                                                                                  | The treatment group was treated with icariin (60 mg/kg, suspended in saline) by gastric instillation 1 h prior to CORT injection once a day for 21 days                                                  | Icariin produced an antidepressant-like effect in CORT-induced depressive rats                                    | Icariin increased the BDNF expression in the hippocampus, regulated the energy metabolism, lipid metabolism, amino acid metabolism and gut microbe metabolism                                                                                                  |

|                                       |                     |                           |            |   |                                                             |                                                                                                                                                                                         |                                                                                                                                         |                                                                                                                                                                                                                                                       |
|---------------------------------------|---------------------|---------------------------|------------|---|-------------------------------------------------------------|-----------------------------------------------------------------------------------------------------------------------------------------------------------------------------------------|-----------------------------------------------------------------------------------------------------------------------------------------|-------------------------------------------------------------------------------------------------------------------------------------------------------------------------------------------------------------------------------------------------------|
| Guo Y et al. 2018 <sup>[100]</sup>    | ICR mice            | CRS-depression            | Prebiotics | – | Rosemary extracts                                           | Receiving rosemary extracts (100 mg/kg) for 21 days during CRS stress                                                                                                                   | Pretreatment with rosemary extracts prevented the depressive- and anxiety-like behaviors                                                | Rosemary extracts improved antiinflammatory effects in hippocampus, serum and BV-2 microglia as well as rebalanced the gut microbiota                                                                                                                 |
| Hao WZ et al. 2021 <sup>[111]</sup>   | C57BL/6 mice        | CUMS-depression           | Prebiotics | – | Coniferyl ferulate                                          | The mice received coniferyl ferulate at a dose of 50 mg/kg once daily via gavage for 4 weeks                                                                                            | Oral administration of coniferyl ferulate attenuated weight loss and depression-like and anxiety-like behaviors induced by CUMS in mice | Coniferyl ferulate administration significantly ameliorated colonic inflammation, lowered the levels of IL-6, IL-1 $\beta$ , and TNF- $\alpha$ , and restructured the gut microbiome, and microbial metabolism                                        |
| Huang YJ et al. 2021 <sup>[112]</sup> | C57BL/6J mice       | sCSDS-depression          | Prebiotics | – | Water extract of <i>Gastrodia elata</i> (WGE)               | WGE was administered at an optimal dose of 500 mg/kg bw via gavage once a day for 30 successive days                                                                                    | Oral treatment with WGE resulted in reversal of depression-like behavior                                                                | WGE exerts antidepressant-like effects mediated by the serotonergic and KYN pathways in the prefrontal cortex and colon, and altered the gut microbiota composition                                                                                   |
| Lai WD et al. 2022 <sup>[113]</sup>   | Wistar rats         | SD-depression             | Prebiotics | – | Fish oil                                                    | Feeding with a fish oil-rich diet for 10 weeks                                                                                                                                          | A fish oil-based diet reduced anxiety- and depressive-like behaviors, and improved cognitive function under chronic SD.                 | A fish oil-based diet increased the probiotics production, increased the SCFA content, improved the intestinal barrier, increased SCFA receptor expression, and decreased blood circulation proinflammatory status                                    |
| Lax NC et al. 2018 <sup>[114]</sup>   | C57BL/6J mice       | –                         | Prebiotics | – | Cyanobacterial extract DUQ0002I                             | For all injections, fraction DUQ0002I and subfractions DUQ0002I-1A-C, DUQ0002-2-4 were administered at a dose of 40 $\mu$ g per cannula                                                 | DUQ0002I induced robust antidepressant and anxiolytic-effects                                                                           | This extract blocked the 5-HT7R                                                                                                                                                                                                                       |
| Lee HC et al. 2020 <sup>[115]</sup>   | BALB/c mice         | Lard diet-depression      | Prebiotics | – | Fish oil (containing polyunsaturated fatty acid)-based diet | Treatment with fish oil concentrated with 50% EPA and 20% DHA triacylglycerol form for 12 weeks                                                                                         | Treatment with fish oil prevented depressive-like behavior                                                                              | Treatment with fish oil regulated gut microbiota composition, and the prefrontal cortex fatty acid profile                                                                                                                                            |
| Li Y et al. 2018 <sup>[116]</sup>     | Sprague-Dawley rats | CUS-depression            | Prebiotics | – | <i>Cistanche tubulosa</i> extract (CTE)                     | CTE at high dose (CTEH) (400 mg/kg) and low dose (CTEL) (200 mg/kg) were intragastrically administered 1 h before the CUS procedure (8:00 a.m. to 9:00 a.m.) over the course of 4 weeks | CTE significantly improved depression-like behaviors in rats under CUS                                                                  | CTE restored the level of neurotransmitters and neurotrophic factors in CUS rats, regulated the gut microbial composition, and modulated SCFAs concentrations                                                                                         |
| Lin S et al. 2021 <sup>[117]</sup>    | ICR mice            | CRS-depression            | Prebiotics | – | Crocetin                                                    | Receiving crocetin-L (20 mg/kg), crocetin-M (40 mg/kg), crocetin-H (80 mg/kg) for 28 days                                                                                               | Crocetin ameliorated CRS-induced depression-like behaviors in mice                                                                      | Crocetin regulated MKP-1/ERK1/2/CREB pathway and gut microbiota                                                                                                                                                                                       |
| Liu Z et al. 2020 <sup>[118]</sup>    | C57BL/6J mice       | HFD-postpartum depression | Prebiotics | – | Inulin                                                      | Taking standard diet with 37 g inulin/1000 kcal for 8–10 weeks                                                                                                                          | Inulin intake significantly attenuated cognitive deficits and depressive-like behaviors                                                 | Inulin intake upregulated the monoamine neurotransmitters (5-hydroxytryptamine and norepinephrine) and suppressed neuroinflammation                                                                                                                   |
| Mika A et al. 2017 <sup>[119]</sup>   | F344 rats           | LH-depression             | Prebiotics | – | Galactooligosaccharide (GOS), polydextrose (PDX)            | Rats began diets on postnatal day 24 (PND 24) with GOS and PDX (7.0 g/kg each) for 4 weeks                                                                                              | Prebiotics differentially attenuated stress-induced learned helplessness                                                                | Prebiotics diets reduced stress-evoked <i>cfos</i> mRNA in the dorsal raphe nucleus (DRN), attenuated stress-evoked decreases in mRNA for the 5-HT1A autoreceptor in the DRN. GOS and PDX diet increased basal BDNF mRNA within the prefrontal cortex |

|                                               |                     |                                |            |   |                                                                |                                                                                                                                                                                                                   |                                                                                                  |                                                                                                                                                                                                                                                           |
|-----------------------------------------------|---------------------|--------------------------------|------------|---|----------------------------------------------------------------|-------------------------------------------------------------------------------------------------------------------------------------------------------------------------------------------------------------------|--------------------------------------------------------------------------------------------------|-----------------------------------------------------------------------------------------------------------------------------------------------------------------------------------------------------------------------------------------------------------|
| O'Mahony SM et al. 2020 <sup>[120]</sup>      | Sprague-Dawley rats | MS-depression                  | Prebiotics | – | Polydextrose/galactooligosaccharide prebiotic blend            | Test diets differed from control diet by the inclusion of (a) GOS 20.86 g/kg and PDX 6.44 g/kg (Prebiotic)                                                                                                        | Dietary interventions altered stress-induced spatial learning and memory                         | Dietary interventions regulated the hypothalamic-pituitary-adrenal axis, reduced the long-term impact of MS on myelination, and influenced the gut microbiota composition                                                                                 |
| Pusceddu MM et al. 2015 <sup>[121]</sup>      | Sprague-Dawley rats | MS                             | Prebiotics | – | N-3 Polyunsaturated Fatty Acids (PUFAs)                        | Oral administration of an eicosapentaenoic acid (EPA)/docosahexaenoic acid (DHA) (80% EPA, 20% DHA) (0.4 g/kg/day or 1 g/kg/day) n-3 PUFAs mixture was administered by gavage when animals reached 5 weeks of age | No data                                                                                          | Long-term supplementation of EPA/DHA restored the microbiota composition                                                                                                                                                                                  |
| Qu Y et al. 2020 <sup>[122]</sup>             | C57BL/6 mice        | CSDS-depression                | Prebiotics | – | Betaine                                                        | Betaine (2.5% as monohydrate in drinking water) was given to mice for 24 days from day 1 to day 24                                                                                                                | Betaine supplementation contributed to resilience to anhedonia in mice subjected to CSDS         | Betaine had prophylactic effects for abnormal composition of gut microbiota in mice after CSDS and anti-inflammation action                                                                                                                               |
| Robertson RC et al. 2017 <sup>[123]</sup>     | C57BL/6J mice       | n-3 PUFA deficiency-depression | Prebiotics | – | N-3 Polyunsaturated Fatty Acids (PUFAs)                        | Fed with n-3 PUFAs supplemented diet (1 g Eicosapentaenoic acid (EPA) + Docosahexaenoic acid (DHA)/100 g diet) or n-3 PUFAs deficient diet from gestational day 0                                                 | N-3 PUFAs supplementation prevented depressive-like behaviors and memory defect                  | N-3 PUFAs supplementation comprehensively altered the gut microbiota composition, HPA-axis activity and inflammation                                                                                                                                      |
| Song J et al. 2019b <sup>[124]</sup>          | Wistar rats         | ACTH-depression                | Prebiotics | – | Polyphenols: chlorogenic acid (CGA)                            | CGA pretreatment (500 mg/kg) by intragastric administration 1 h prior to ACTH injection once a day for 14 days                                                                                                    | CGA pretreatment ameliorated depressive-like behavior                                            | CGA pretreatment increased the level of monoamine neurotransmitters and reduced the levels of inflammatory cytokines, and modified gut microbial community structure                                                                                      |
| Song X et al. 2021 <sup>[125]</sup>           | ICR mice            | CUMS-depression                | Prebiotics | – | Puerarin                                                       | Low and high doses of Puerarin were 30 and 100 mg/kg, respectively, and these were administered intragastrically in the model                                                                                     | Puerarin (100 mg/kg) treatment was found to alleviate the CUMS-induced depression-like behaviors | Puerarin treatment reversed the gut microbial changes induced by CUMS                                                                                                                                                                                     |
| Sun Y et al. 2020 <sup>[126]</sup>            | C57BL/6 mice        | LPS-depression                 | Prebiotics | – | Schisandrin                                                    | Mice were treated with schisandrin (30 mg/kg, i.p.) for 14 days                                                                                                                                                   | Schisandrin pre-treatment attenuated LPS-induced depressive-like behaviors in mice               | Schisandrin might recover the gut microbial disorder of depressive mice through suppressing the expression of TLR4/NF- $\kappa$ B signaling pathway                                                                                                       |
| Tian P et al. 2021 <sup>[127]</sup>           | mice                | CRS-depression                 | Prebiotics | – | SCFA-Acylated Starches                                         | Feeding with 15% acylated starch for 2 weeks during chronic restraint stress                                                                                                                                      | Consumption of SCFA-acylated starches alleviated the depressive symptoms of stressed mice        | SCFA-Acylated Starches significantly reduced the colonic permeability via increasing the tight junction proteins (including ZO-1, Claudin, and Occludin) gene expression and reduced the level of the inflammatory cytokines, and modified gut microbiome |
| Tung TH et al. 2019 <sup>[128]</sup>          | Sprague-Dawley rats | CMS-depression                 | Prebiotics | – | Fish oil (containing polyunsaturated fatty acid) and olive oil | Male rats were fed fish oil-rich (contained 20.5% (w/w) EPA and 11.2% DHA) or olive oil-rich diets for 14 weeks                                                                                                   | Fish oil intervention reversed the stress-induced abnormal depressive-like behavior              | Fish oil and olive oil exerted part of a prebiotic-like effect to ameliorate dysbiosis induced by CMS                                                                                                                                                     |
| Vald -Sustaita B et al. 2021 <sup>[129]</sup> | Wistar rats         | Ovariectomized-depression      | Prebiotics | – | Aqueous extract of pomegranate (AE-PG)                         | The pomegranate extract (AE-PG) was dissolved in saline solution 0.9% and given by intraperitoneal route.                                                                                                         | AE-PG administered by intraperitoneal route induced antidepressant-like effects                  | AE-PG given intraperitoneally activated the ER $\beta$ and the serotonergic system                                                                                                                                                                        |



|                                     |                     |                    |            |   |                                                              |                                                                                                                                                                                       |                                                                                                                                             |                                                                                                                                                                                                                                                                             |
|-------------------------------------|---------------------|--------------------|------------|---|--------------------------------------------------------------|---------------------------------------------------------------------------------------------------------------------------------------------------------------------------------------|---------------------------------------------------------------------------------------------------------------------------------------------|-----------------------------------------------------------------------------------------------------------------------------------------------------------------------------------------------------------------------------------------------------------------------------|
| Wang L et al. 2020 <sup>[130]</sup> | Kummig mice         | CUMS-depression    | Prebiotics | – | Total iridoids of Valeriana jatamansi (TIV)                  | Treated with lowdose, medium-dose, or high-dose TIV (5.7, 11.4, and 22.9 mg/kg/d, respectively) at a volume of 10 mL/kg by the intragastric route once per day for 2 successive weeks | Administration of TIV increased body weight, sucrose solution consumption, and ameliorated depression-like behaviors                        | It is concluded that the antidepressant effects of TIV may be related to gut flora structures and regulation of 5-HT, NE, SP, and CRF in the brain and intestine                                                                                                            |
| Wang L et al. 2021 <sup>[131]</sup> | Sprague-Dawley rats | CUMS-depression    | Prebiotics | – | Soy isoflavones                                              | The SI low dose, SI middle dose, and SI high dose groups were given SI at a dose of 40 mg/kg, 80 mg/kg, and 160 mg/kg per group per rat per day by oral gavage for 8 weeks            | Soy isoflavones supplements significantly improved the CUMS-induced depression-like behaviour                                               | Soy isoflavones supplements increased monoamine neurotransmitters of CUMS rats by reshaping the structure of the gut microbiota                                                                                                                                             |
| Wang P et al. 2022 <sup>[132]</sup> | C57BL/6J mice       | Alcohol-depression | Prebiotics | – | Propolis                                                     | Propolis group was given 120 mg/kg of propolis by gavage daily for 10 weeks                                                                                                           | Propolis exerted an improving effect on alcohol-induced depressive symptoms                                                                 | Propolis dietary supplementation repaired the intestinal mucosal barrier and hippocampal injury, and further improved brain gut dysfunction.                                                                                                                                |
| Wang Q et al. 2019 <sup>[133]</sup> | CD-1 mice           | CMS-depression     | Prebiotics | – | Sesamin                                                      | Orally administered with sesamin (50 mg/kg/day, dissolved in olive oil) for 10 weeks                                                                                                  | Oral sesamin administration (50 mg/kg bodyweight/day) significantly attenuated depressive, aversive, repetitive, and anxiety-like behaviors | Sesamin inhibited stress-induced gut barrier integrity damage, reduced circulating lipopolysaccharide levels, suppressed neuroinflammatory responses, and restructured the gut microbiome                                                                                   |
| Wang R et al. 2021 <sup>[134]</sup> | C57BL/6J mice       | CRS-depression     | Prebiotics | – | Total Flavone of Abelmoschus manihot (TFA)                   | TFA was suspended in 1% carboxymethyl cellulose solution at different concentrations for oral administration (62.5 and 125 mg/kg) for 37 days                                         | TFA treatment improved the depressive-like phenotype                                                                                        | TFA treatment improved the disturbed gut microbiota, and the intestinal barrier function                                                                                                                                                                                    |
| Xia J et al. 2021 <sup>[135]</sup>  | C57BL/6J mice       | LPS-depression     | Prebiotics | – | Capsaicin                                                    | The mice were fed standard laboratory chow plus 0.005% capsaicin for 4 months                                                                                                         | Dietary capsaicin improved depressive-like behavior                                                                                         | Dietary CAP regulated the structure of gut microbiota, increased the levels of the monoamine neurotransmitter 5-HT, and reduced the levels of inflammatory cytokine TNF- $\alpha$ in LPS-induced mice                                                                       |
| Xiao Q et al. 2020 <sup>[136]</sup> | C57BL/6 mice        | CRS-depression     | Prebiotics | – | Crocin-I                                                     | Mice were daily supplied with crocin-I at a dose of 40 mg/kg by gavage for six weeks                                                                                                  | Administration of crocin-I mitigated depression-like behaviors                                                                              | Oral administration of crocin-I improved the structure of gut microbiota to restore SCFAs levels and intestinal barrier function, thereby decreasing the neuroinflammation and increasing BDNF protein to effectively alleviated depression-like behavior in depressed mice |
| Xue M et al. 2021 <sup>[137]</sup>  | C57BL/6J mice       | Alcohol-depression | Prebiotics | – | Fucoidan extracted from Fucus vesiculosus                    | Receiving 300 mg/kg body weight of fucoidan at 12:00 a.m. during the 10 weeks' experiment.                                                                                            | Oral administration of fucoidan alleviated alcohol withdrawal-induced depressionlike behaviors of mice                                      | Oral administration of fucoidan regulated the gut flora of mice and reduced endotoxemia, down-regulated the TLR4/MyD88/NF- $\kappa$ B p65 pathway, inhibited alcohol-induced microglia cell activation and inflammation                                                     |
| Yan T et al. 2020 <sup>[138]</sup>  | C57BL/6 mice        | CUMS-depression    | Prebiotics | – | Polysaccharide from okra (Abelmoschus esculentus (L) Moench) | Mice were treated with polysaccharide (400 mg/kg, i.g.) for 14 days                                                                                                                   | Polysaccharide treatment alleviated depressive-like behaviors in CUMS-induced mice                                                          | Polysaccharide treatment inhibited the inactivation of inflammatory reactions in the colon, serum, hippocampus as well as BV2 cells, down-regulated the TLR4/ NF- $\kappa$ B                                                                                                |

|                                      |                     |                                        |            |   |                                                                                                                       |                                                                                                                                                                                            |                                                                                                                          |                                                                                                                                                                                                                                                                                                   |
|--------------------------------------|---------------------|----------------------------------------|------------|---|-----------------------------------------------------------------------------------------------------------------------|--------------------------------------------------------------------------------------------------------------------------------------------------------------------------------------------|--------------------------------------------------------------------------------------------------------------------------|---------------------------------------------------------------------------------------------------------------------------------------------------------------------------------------------------------------------------------------------------------------------------------------------------|
|                                      |                     |                                        |            |   |                                                                                                                       |                                                                                                                                                                                            |                                                                                                                          | pathway and MAPKs signaling, and rebalanced the intestinal flora                                                                                                                                                                                                                                  |
| Yan T et al. 2021 <sup>[139]</sup>   | C57BL/6 mice        | LPS-depression                         | Prebiotics | – | Schisandra chinensis fractions: total extracts (SCE), lignans (SCL), polysaccharides (SCPS), and essential oil (SCVO) | Mice were treated with fractions (SCE treatment [1.2 g/kg], SCL treatment [500 mg/kg], SCPS treatment [300 mg/kg] , SCVO treatment [150 mg/kg] ) (i.g.) for 14 days                        | Fractions treatment alleviated depressive-like behaviors in LPS-induced mice                                             | Fractions treatment regulated the neuroinflammation via the TLR4/NF- $\kappa$ B/IKK $\alpha$ signaling pathway, and recovered the gut microbiota                                                                                                                                                  |
| Yu JB et al. 2019 <sup>[140]</sup>   | Sprague-Dawley rats | CUS-depression                         | Prebiotics | – | Paeoniflorin                                                                                                          | Mice were treated with paeoniflorin at a dose of 10 mg/kg or 20 mg/kg for 8 weeks                                                                                                          | Paeoniflorin treatment alleviated depressive-like behaviors in CUS-induced mice                                          | Paeoniflorin regulated the composition of the gut microbiota by increasing the abundance of probiotics. And benzoic acid, the gut characteristic metabolite of paeoniflorin, was absorbed into blood and penetrated the BBB and entered the central nervous system relieving depressive behaviors |
| Zhang L et al. 2021 <sup>[141]</sup> | Kunming mice        | CUMS-depression                        | Prebiotics | – | Total iridoids of Valeriana jatamansi (TIV)                                                                           | Treated with lowdose, medium-dose, or high-dose TIV (5.7, 11.4, and 22.9 mg/kg/d, respectively) at a volume of 10 mL/kg by the intragastric route once per day for 2 successive weeks      | Administration of TIV increased body weight, sucrose solution consumption, and ameliorated depression-like behaviors     | TIV may modulate the intestinal flora, thereby inducing the expression of ZO-1 and occludin, protecting the blood-brain barrier                                                                                                                                                                   |
| Zhang M et al. 2021 <sup>[142]</sup> | ICR mice            | CUMS-depression                        | Prebiotics | – | Sophora alopecuroides L.-derived alkaloids                                                                            | Alkaloids were dissolved in 0.9% saline at a stock concentration of 3 mg/ml, and the mice received 30 mg/kg alkaloids for 4 weeks                                                          | Sophora alopecuroides L.-derived alkaloids improved depression-like behaviors and depression-related indicators in mice. | Alkaloids improved depression in mice through modulating gut microbiota                                                                                                                                                                                                                           |
| Zhang Z et al. 2022 <sup>[143]</sup> | C57BL/6 mice        | CRS-depression                         | Prebiotics | – | Hyperforin                                                                                                            | Hyperforin is dissolved in DMSO and the dosage of hyperforin is 0.38mg/kg.Mice in hyperforin treated group were intraperitoneally injected with hyperforin solution before daily restraint | Hyperforin prevented anhedonia induced by CRS in mice                                                                    | Hyperforin prevented altered the richness and evenness of bacteria populations                                                                                                                                                                                                                    |
| Zhao B et al. 2020 <sup>[144]</sup>  | C57BL/6 mice        | DSS-depression                         | Prebiotics | – | Lycopene                                                                                                              | Treating with distilled water and lycopene (50 mg/kg body weight/day) mixed in standard diet (AIN-93M) for 35 days                                                                         | Lycopene improved DSS-induced depression and anxiety-like behavioral disorders                                           | Lycopene suppressed neuroinflammation and prevented synaptic ultrastructure damages by upregulating the expressions of neurotrophic factor and postsynaptic-density protein, and reshaped the gut microbiome and improved the gut barrier integrity                                               |
| Zhao F et al. 2021 <sup>[145]</sup>  | Sprague-Dawley rats | Prenatal CUMS-depression in offsprings | Prebiotics | – | Lycium barbarum polysaccharide (LBP)                                                                                  | Gavaging with LBP at 14:00 daily, the concentration of gavage is 40 mg/kg, for 14 days                                                                                                     | LBP treatment improved the body weight, changed the emotional function                                                   | LBP treatment reduced offspring's plasma corticosterone level and increased the diversity of gut microbiota                                                                                                                                                                                       |

|                                          |                     |                                                            |                                        |                                               |                                                                                                          |                                                                                                                                                                                                                                                                                               |                                                                                                                                                                                                               |                                                                                                                                                                                                                                                                                   |
|------------------------------------------|---------------------|------------------------------------------------------------|----------------------------------------|-----------------------------------------------|----------------------------------------------------------------------------------------------------------|-----------------------------------------------------------------------------------------------------------------------------------------------------------------------------------------------------------------------------------------------------------------------------------------------|---------------------------------------------------------------------------------------------------------------------------------------------------------------------------------------------------------------|-----------------------------------------------------------------------------------------------------------------------------------------------------------------------------------------------------------------------------------------------------------------------------------|
| Zhao ZX et al. 2018 <sup>[146]</sup>     | Sprague-Dawley rats | CUS-depression                                             | Prebiotics                             | -                                             | Albiflorin                                                                                               | Treating with benzoic acid (14 mg/kg)(albiflorin metabolites),albiflorin (7 mg/kg),albiflorin (14 mg/kg)for 2 weeks                                                                                                                                                                           | Benzoic acid, a therapeutic mediator of albiflorin generated by the gut microbiota, after crossing the blood-brain barrier, entered the central nervous system to exert antidepressant effects                | Albiflorin treatment regulated the gut microbiota and inhibited D-amino acid oxidase in the brain                                                                                                                                                                                 |
| Li H et al. 2019 <sup>[147]</sup>        | Wistar rats         | CUMS-depression                                            | Probiotics, prebiotics                 | Bifidobacterium, Lactobacillus                | Fructo-oligosaccharides (FOS), Galacto-oligosaccharides (GOS), B. longum, L. rhamnosus                   | Orally gavaged with with FOS and GOS (8%, 1 mL per 100g weight; FOS/GOS) or with B. longum (1 × 10 <sup>9</sup> CFU per 100 g weight) or with L. rhamnosus (1 × 10 <sup>9</sup> CFU per 100 g weight) during the CUMS molding for 4 weeks                                                     | Prebiotics (FOS/GOS) and probiotics (B. longum and L. rhamnosus) alleviated CUMS-induced depressive-like behaviors                                                                                            | Prebiotics and probiotics treatment has a considerable impact on the modulation of tryptophan metabolism and the composition of gut microbiota                                                                                                                                    |
| Gilbert K et al. 2012 <sup>[148]</sup>   | Sprague-Dawley rats | Post-myocardial infarction depression                      | Probiotics, prebiotics                 | Lactobacillus, Bifidobacterium                | L. helveticus R0052, B. longum R0175, and PUFA n-3 diets                                                 | Each rat in the probiotics group received a daily dose of 10 <sup>9</sup> CFU for 2 weeks                                                                                                                                                                                                     | Depressive-like behaviour was attenuated with the high-PUFA n-3 diet or/and probiotics                                                                                                                        | A high-PUFA n-3 diet or the administration of probiotics were beneficial to attenuate apoptosis in the limbic system in the rat                                                                                                                                                   |
| Zhu X et al. 2017 <sup>[149]</sup>       | Sprague-Dawley rats | CUS-depression                                             | Probiotics, prebiotics                 | Bifidobacterium                               | Bifidobacterium, Berberine                                                                               | Prior to modeling with each chronic unpredictable stress method, the rats were treated with either 2 ml of a low concentration of berberine (40 mg/kg/day), a high concentration of berberine (200 mg/kg/day), bifidobacterium (140 mg/kg/day)                                                | Berberine and bifidobacterium treatment alleviated depressive behaviors caused by CUS                                                                                                                         | Berberine and bifidobacterium appeared to reverse the physical damage brought about by stress within the gastric mucosa and intestinal microvilli of the stomach, ileum, cecum and colon                                                                                          |
| Westfall S et al. 2021a <sup>[150]</sup> | C57BL/6J mice       | CUMS-depression<br>CUMS+US-depression                      | Probiotics, prebiotics, and synbiotics |                                               | L. plantarum ATCC 793, B. longum ATCC 15707, Bioactive Dietary Polyphenol Preparation (BDPP)             | The bacteria were incorporated into the animals' drinking water at a final dosage of 1.0x10 <sup>9</sup> CFU/day per bacterium; BDPP was comprised of 1% w/v grape seed polyphenol extract, 1% w/v resveratrol and a 5% w/v concord grape extract made in sterile water during the experiment | The probiotic and synbiotic attenuated depressive-like behavior following CUS, while the synbiotic rescued the phenotype following CUS and CUS+US; only BDPP and the synbiotic improved anxiety-like behavior | Microbiota-targeted treatment normalized gut microbiota populations and promoted regulatory T cell (Treg) expansion through modulation of ileal innate lymphoid cell (ILC)3 activity, an impact reflecting behavioral responses better than limbic brain region neuroinflammation |
| Westfall S et al. 2021b <sup>[151]</sup> | C57BL/6J mice       | CUS-depression                                             | Probiotics, prebiotics, and synbiotics | Lactobacillus, Bifidobacterium                | L. plantarum ATCC 793, B. longum ATCC 15707, Bioactive Dietary Polyphenol Preparation (BDPP)             | The bacteria were incorporated into the animals' drinking water at a final dosage of 1.0x10 <sup>9</sup> CFU/day per bacterium; BDPP was comprised of 1% w/v grape seed polyphenol extract, 1% w/v resveratrol and a 5% w/v concord grape extract made in sterile water during the experiment | The probiotic and synbiotic attenuated stress-induced depressive- and anxiety-like behaviors                                                                                                                  | A synbiotic rescued stress-induced reduction in serotonin through inflammatory and kynurenine pathway regulation, attenuated peripheral and neuroinflammatory responses, and ameliorated the stress-induced increase of the T helper 17 to regulatory T cell ratio                |
| Mesripour A et al. 2021 <sup>[152]</sup> | albino mice         | Dexamethasone or water avoidance stress induced depression | Synbiotics                             | Lactobacillus, Bifidobacterium, Streptococcus | Syn cocktail containing L. casei, L. acidophilus, L. rhamnosus, L. bulgaricus, B. breve, B. infantis, S. | The synbiotic regimen (12.5 × 10 <sup>9</sup> CFU) was supplemented in drinking water for 7 days                                                                                                                                                                                              | Synbiotic mixture prevented the effects of WAS, acute or sub-acute Dex-induced depression in mice                                                                                                             | -                                                                                                                                                                                                                                                                                 |

|                                                 |                      |                 |                                              |             |                                                                                                  |                                                                                                                                                                                                      |                                                                                                                                         |                                                                                                                                                                                                                                                |
|-------------------------------------------------|----------------------|-----------------|----------------------------------------------|-------------|--------------------------------------------------------------------------------------------------|------------------------------------------------------------------------------------------------------------------------------------------------------------------------------------------------------|-----------------------------------------------------------------------------------------------------------------------------------------|------------------------------------------------------------------------------------------------------------------------------------------------------------------------------------------------------------------------------------------------|
|                                                 |                      |                 |                                              |             | thermophiles, and Fructooligosaccharides                                                         |                                                                                                                                                                                                      |                                                                                                                                         |                                                                                                                                                                                                                                                |
| Leo A et al. 2021 <sup>[153]</sup>              | C57BL/6J mice        | CUMS-depression | Prebiotics, Postbiotics                      | –           | $\alpha$ -lactalbumin (ALAC) Sodium butyrate (NaB)                                               | ALAC (125, 250 and 500 mg/kg), NaB (30, 100, 300 mg/kg) and the co-administration of ALAC (125, 250 and 500 mg/kg) with a fixed NaB dose (100 mg/kg) were administered in drinking water for 15 days | ALAC, NaB and their combination reduced depressive- and anxiety-like behaviour in CUMS mice                                             | –                                                                                                                                                                                                                                              |
| Cheng R et al. 2021 <sup>[154]</sup>            | C57BL/6 mice         | CUMS-depression | Postbiotics                                  | Akkermansia | Outer membrane protein Amuc_1100 of <i>A. muciniphila</i>                                        | Mice were gavaged daily with 80 mg of Amuc_1100 in sterile PBS with a volume of 200 $\mu$ l                                                                                                          | Amuc_1100 intervention ameliorated CUMS-induced depression-like behavior                                                                | Amuc_1100 intervention improved the gut microbiota, up-regulated the BDNF level, and inhibited the neuroinflammatory response                                                                                                                  |
| Kochanowska AJ et al. 2008 <sup>[155]</sup>     | Swiss Webster mice   | Healthy status  | Postbiotics                                  | –           | Secondary metabolites from sponges (brominated compounds, sesquiterpene quinones, hydroquinones) | Each group was injected ip with the compound at a dose of 1–20 mg/kg                                                                                                                                 | 5,6-Dibromo-N,N-dimethyltryptamin possessed significant antidepressant-like activity                                                    | –                                                                                                                                                                                                                                              |
| Li J et al. 2018 <sup>[156]</sup>               | Sprague-Dawley rats  | CUMS-depression | Postbiotics                                  | –           | Sodium propionate (NaP, the salt form of propionic acid)                                         | 1 mL of NaP (200 mmol/L) was administered intrarectally every day for 1 week from the beginning of the 5th week                                                                                      | Administration of NaP induced antidepressant-like effects                                                                               | Administration of NaP rebalanced the plasma metabolome, and rescued the neurotransmitters in the prefrontal cortex, which may be achieved through the reduction of catabolism of noradrenaline, tryptophan and dopamine, rather than serotonin |
| Matsuda Y et al. 2020 <sup>[157]</sup>          | Sprague-Dawley rats  | CSDS-depression | Postbiotics                                  | –           | Ergothioneine, a metabolite of <i>Lactobacillus reuteri</i>                                      | Oral administration of L-ergothioneine (0.25 mg/ml) aqueous solution was conducted from 1 week prior to SDS initiation (day -7) to the end SDS application (day 14)                                  | Oral administration of ergothioneine prior to and during the SDS paradigm had a preventative effect on SDS-induced depressive behaviors | –                                                                                                                                                                                                                                              |
| Yu M et al. 2021 <sup>[158]</sup>               | Wistar rats          | CVS-depression  | A broad-spectrum $\beta$ -lactam antibiotics | –           | Tienam (imipenem/cilastatin sodium with equal quantities)                                        | Imipenem/cilastatin sodium was administered at a daily dose of 75 mg/kg of body weight from day 25 to day 28 during 28 days' CVS                                                                     | Antibiotic treatment reversed the depression-like behaviors                                                                             | Antibiotic treatment regulated the purine metabolism and fatty acid metabolism that are impacted by gut bacteria                                                                                                                               |
| Suzuki K et al. 2021 <sup>[159]</sup>           | C57BL/6 J (B6J) mice | CSDS-depression | Antibacterial active peptides                | –           | $\alpha$ -defensin (Cryptdin-4)                                                                  | Recombinant Cryptdin-4 (mouse $\alpha$ -defensin) were dissolved in ultrapure water and administered orally at 250 $\mu$ g/mouse once daily from day 1 to day 32                                     | No data                                                                                                                                 | Administration of $\alpha$ -defensin recovered dysbiosis and significant microbial composition changes in the intestinal metabolites                                                                                                           |
| Martin-Hernandez D et al. 2016 <sup>[160]</sup> | Wistar rats          | CMS-depression  | Antibiotics                                  | –           | Streptomycin, Penicillin G                                                                       | Giving drinking water ad libitum containing streptomycin sulfate (2 mg/mL) and penicillin G (1500 U/mL) for 21 days                                                                                  | Antibiotics treatment reversed the CMS-induced a depressive-like phenotype                                                              | Antibiotics treatment inhibited bacteria translocation that play a role in the pathophysiology of depression through the p38 MAPK pathway which could aggravate the neuroinflammation and the oxidative/nitrosative damage                     |

|                                           |                     |                 |             |   |                                             |                                                                                                                                                                                                  |                                                                                                               |                                                                                                                                                                                                                                 |
|-------------------------------------------|---------------------|-----------------|-------------|---|---------------------------------------------|--------------------------------------------------------------------------------------------------------------------------------------------------------------------------------------------------|---------------------------------------------------------------------------------------------------------------|---------------------------------------------------------------------------------------------------------------------------------------------------------------------------------------------------------------------------------|
| Meng C et al. 2022 <sup>[161]</sup>       | Sprague-Dawley rats | CUMS-depression | Antibiotics | – | Metronidazole, ciprofloxacin                | Treating with metronidazole (1 g/L) and ciprofloxacin (0.2 g) in drinking water for 5 weeks                                                                                                      | Antibiotics exposure reduced anxiety-like and depression-like behavior of rat                                 | Antibiotics regulated neurotransmitter and inflammatory response through gut microbiota                                                                                                                                         |
| Schmidner AK et al. 2019 <sup>[162]</sup> | NAB/HAB rats        | HAB-depression  | Antibiotics | – | Minocycline                                 | In the first set of experiments, 40 mg/kg/day minocycline, while in the second set, 80 mg/kg/day minocycline alone, all dissolved in tap water, was applied for 22 days                          | Three weeks of minocycline treatment alleviated the depressive-like phenotype                                 | Minocycline treatment promoted an anti-inflammatory state by control of microglial activation and/or modulation of the gut microbiome and metabolome                                                                            |
| Wang S et al. 2020b <sup>[163]</sup>      | C57BL/6 mice        | CSDS-depression | Antibiotics | – | Ampicillin, Neomycin sulfate, Metronidazole | Broad-spectrum antibiotics (ampicillin 1 g/L, neomycin sulfate 1 g/L, and metronidazole 1 g/L) dissolved in drinking water were provided ad libitum to male C57BL/6 mice for 14 consecutive days | CSDS did not produce an anhedonia-like phenotype in the antibiotic-treated mice                               | Antibiotic-treated reduced the diversity of gut microbiota, and changed their composition                                                                                                                                       |
| Wong ML et al. 2016 <sup>[164]</sup>      | C57BL/6J mice       | CRS-depression  | Antibiotics | – | Minocycline                                 | Treating with minocycline (LKT Laboratories, St Paul, MN, USA; 5 mg/kg per day in 10 ml/kg saline, intraperitoneally) for 21 days                                                                | Minocycline treatment decreased depressive- and anxiety-like behaviors                                        | Minocycline treatment regulated the gut microbiota–inflammation–brain axis, characterized by attenuated inflammation and rebalanced the gut microbiota                                                                          |
| Yang Q et al. 2020 <sup>[165]</sup>       | C57BL/6 mice        | CUMS-depression | Antibiotics | – | Minocycline                                 | Minocycline (40 mg/kg, Cayman Chemical) was administered intraperitoneally daily for 4 weeks starting 2 weeks after CUMS                                                                         | Minocycline treatment for 4 weeks, not acute treatment, exerted antidepressant effect in mice exposed to CUMS | Chronic minocycline treatment inhibited neuroinflammation of hippocampus and altered species abundance and metabolites of gut microbiota, and ameliorated intestinal barrier disruption and reduced the bacteriological indexes |

## References

1. J. Rao, R. Xie, L. Lin, J. Jiang, L. Du, X. Zeng, G. Li, C. Wang and Y. Qiao, *Eur J Neurosci* **2021**, *53*, 3598-3611.
2. J. Rao, Y. Qiao, R. Xie, L. Lin, J. Jiang, C. Wang and G. Li, *J Psychiatr Res* **2021b**, *137*, 147-157.
3. S.-K. Han, J.-K. Kim, H.-S. Park, Y.-J. Shin and D.-H. Kim, *Chin Med* **2021**, *16*, 77.
4. P. R. Marcondes Ávila, M. Fiorot, M. Michels, D. Domingui, M. Abatti, A. Vieira, A. B. de Moura, J. P. Behenck, L. A. Borba, M. E. M. Botelho, G. Z. Réus, F. Dal-Pizzol and C. Ritter, *J Affect Disord* **2020**, *277*, 410-416.
5. Z. Xu, Z. Liu, X. Dong, T. Hu, L. Wang, J. Li, X. Liu and J. Sun, *Chin J Physiol* **2018**, *61*, 360-371.
6. Y. Zhang, R. Huang, M. Cheng, L. Wang, J. Chao, J. Li, P. Zheng, P. Xie, Z. Zhang and H. Yao, *Microbiome* **2019**, *7*, 116.

7. H. Zhou, S. Zhang, X. Zhang, H. Zhou, T. Wen and J. Wang, *Biochem Biophys Res Commun* **2022**, *593*, 137-143.
8. Z. Wu, P. Wang, D. Pan, X. Zeng, Y. Guo and G. Zhao, *J Dairy Sci* **2021**, *104*, 78-91.
9. S.-K. Han, M.-K. Joo, J.-K. Kim, W. Jeung, H. Kang and D.-H. Kim, *Nutrients* **2020a**, *12*,
10. C. Y. Ko, H.-T. V. Lin and G. J. Tsai, *Process Biochemistry* **2013**, *48*, 559-568.
11. A. K. Warda, K. Rea, P. Fitzgerald, C. Hueston, E. Gonzalez-Tortuero, T. G. Dinan and C. Hill, *Behav Brain Res* **2019**, *362*, 213-223.
12. N. Xu, W. Fan, X. Zhou, Y. Liu, P. Ma, S. Qi and B. Gu, *Metab Brain Dis* **2018**, *33*, 1625-1633.
13. A. Abildgaard, T. Kern, O. Pedersen, T. Hansen, S. Lund and G. Wegener, *Eur Neuropsychopharmacol* **2021**, *43*, 10-21.
14. N. Li, Q. Wang, Y. Wang, A. Sun, Y. Lin, Y. Jin and X. Li, *Front Behav Neurosci* **2018**, *12*, 266.
15. Q. F. Liu, H.-M. Kim, S. Lim, M.-J. Chung, C.-Y. Lim, B.-S. Koo and S.-S. Kang, *Daru* **2020**, *28*, 181-189.
16. Y. Ding, F. Bu, T. Chen, G. Shi, X. Yuan, Z. Feng, Z. Duan, R. Wang, S. Zhang, Q. Wang, J. Zhou and Y. Chen, *Appl Microbiol Biotechnol* **2021**, *105*, 8411-8426.
17. A. Abildgaard, B. Elfving, M. Hokland, G. Wegener and S. Lund, *Psychoneuroendocrinology* **2017a**, *79*, 40-48.
18. A. Abildgaard, B. Elfving, M. Hokland, S. Lund and G. Wegener, *Brain Behav Immun* **2017b**, *65*, 33-42.
19. A. Abildgaard, T. Kern, O. Pedersen, T. Hansen, G. Wegener and S. Lund, *Eur Neuropsychopharmacol* **2019**, *29*,
20. A. Agusti, A. Moya-Pérez, I. Campillo, S. Montserrat-de la Paz, V. Cerrudo, A. Perez-Villalba and Y. Sanz, *Mol Neurobiol* **2018**, *55*, 5337-5352.
21. J. Arseneault-Bréard, I. Rondeau, K. Gilbert, S.-A. Girard, T. A. Tompkins, R. Godbout and G. Rousseau, *Br J Nutr* **2012**, *107*, 1793-1799.
22. A. Arslanova, A. Tarasova, A. Alexandrova, V. Novoselova, I. Shaidullov, D. Khusnutdinova, T. Grigoryeva, D. Yarullina, O. Yakovleva and G. Sitdikova, *Life (Basel)* **2021**, *11*,
23. H. Aygun, A. T. Akin, N. Kızılaslan, O. Sumbul and D. Karabulut, *Epilepsy Behav* **2022**, *128*, 108588.
24. T. Barros-Santos, K. S. O. Silva, M. Libarino-Santos, C.-P. Elisângela Gouveia, H. S. Reis, E. K. Tamura, A. J. de Oliveira-Lima, L. F. Berro, A. P. T. Uetanabaro and E. A. V. Marinho, *PLoS One* **2020**, *15*, e0234037.

25. A. Bharwani, M. F. Mian, M. G. Surette, J. Bienenstock and P. Forsythe, *BMC Med* **2017**, *15*, 7.
26. P. T. Birmann, A. M. Casaril, A. P. Pesarico, P. S. Caballero, T. Â. Smaniotto, R. R. Rodrigues, Â. N. Moreira, F. R. Conceição, F. S. S. Sousa, T. Collares, F. K. Seixas, R. T. França, C. D. Corcini and L. Savegnago, *Pharmacol Res* **2021**, *171*, 105740.
27. J. A. Bravo, P. Forsythe, M. V. Chew, E. Escaravage, H. M. Savignac, T. G. Dinan, J. Bienenstock and J. F. Cryan, *Proc Natl Acad Sci U S A* **2011**, *108*, 16050-16055.
28. P. Chen, M. Hei, L. Kong, Y. Liu, Y. Yang, H. Mu, X. Zhang, S. Zhao and J. Duan, *Food Funct* **2019**, *10*, 8161-8171.
29. T. Chen, R. Wang, Z. Duan, X. Yuan, Y. Ding, Z. Feng, F. Bu, L. Liu, Q. Wang, J. Zhou, L. Zhu, Q. Ni, G. Shi and Y. Chen, *Front Cell Infect Microbiol* **2021**, *11*, 723856.
30. X. Chen, S. Meng, Y. Yu, S. Li, L. Wu and Y. Zhang, *Int J Occup Med Environ Health* **2022**, *35*,
31. Y. Chen, N. Xiao, Y. Chen, X. Chen, C. Zhong, Y. Cheng, B. Du and P. Li, *Food Res Int* **2021b**, *150*, 110808.
32. G. Chevalier, E. Siopi, L. Guenin-Macé, M. Pascal, T. Laval, A. Rifflet, I. G. Boneca, C. Demangel, B. Colsch, A. Pruvost, E. Chu-Van, A. Messenger, F. Leulier, G. Lepousez, G. Eberl and P.-M. Lledo, *Nat Commun* **2020**, *11*, 6363.
33. J. Choi, Y.-K. Kim and P.-L. Han, *Exp Neurobiol* **2019**, *28*, 158-171.
34. J. Choi, H. Kwon, Y.-K. Kim and P.-L. Han, *Mol Neurobiol* **2022**, *59*, 2715-2728.
35. V. Daugé, C. Philippe, M. Mariadassou, O. Rué, J.-C. Martin, M.-N. Rossignol, N. Dourmap, L. Svilar, F. Tourniaire, M. Monnoye, D. JarDET, M. Bangratz, S. Holowacz, S. Rabot and L. Naudon, *Front Behav Neurosci* **2020**, *14*, 581296.
36. L. Desbonnet, L. Garrett, G. Clarke, B. Kiely, J. F. Cryan and T. G. Dinan, *Neuroscience* **2010**, *170*, 1179-1188.
37. J. Dhaliwal, D. P. Singh, S. Singh, A. K. Pinnaka, R. K. Boparai, M. Bishnoi, K. K. Kondepudi and K. Chopra, *J Appl Microbiol* **2018**, *125*, 257-269.
38. K. Gao, A. Farzi, X. Ke, Y. Yu, C. Chen, S. Chen, T. Yu, H. Wang and Y. Li, *Food Funct* **2022**, *13*, 957-969.
39. F. Gu, Y. Wu, Y. Liu, M. Dou, Y. Jiang and H. Liang, *Food Funct* **2020**, *11*, 6148-6157.

40. F. Guida, F. Turco, M. Iannotta, D. De Gregorio, I. Palumbo, G. Sarnelli, A. Furiano, F. Napolitano, S. Boccella, L. Luongo, M. Mazzitelli, A. Usiello, F. De Filippis, F. A. Iannotti, F. Piscitelli, D. Ercolini, V. de Novellis, V. Di Marzo, R. Cuomo and S. Maione, *Brain Behav Immun* **2018**, *67*, 230-245.
41. Y. Guo, J.-P. Xie, K. Deng, X. Li, Y. Yuan, Q. Xuan, J. Xie, X.-M. He, Q. Wang, J.-J. Li and H.-R. Luo, *Front Behav Neurosci* **2019**, *13*, 126.
42. S.-K. Han and D. H. Kim, *J Microbiol Biotechnol* **2019**, *29*, 1369-1374.
43. S.-K. Han, J.-K. Kim, M.-K. Joo, K.-E. Lee, S.-W. Han and D. H. Kim, *J Microbiol Biotechnol* **2020b**, *30*, 1222-1226.
44. W. Hao, J. Wu, N. Yuan, L. Gong, J. Huang, Q. Ma, H. Zhu, H. Gan, X. Da, L. Deng, X. Li and J. Chen, *Front Pharmacol* **2021**, *12*, 619103.
45. Z. Hao, W. Wang, R. Guo and H. Liu, *Psychoneuroendocrinology* **2019**, *104*, 132-142.
46. F. Huang, X. Liu, S. Xu, S. Hu, S. Wang, D. Shi, K. Wang, Z. Wang, Q. Lin, S. Li, S. Zhao, K. Jin, C. Wang, L. Chen and F. Wang, *Front Nutr* **2021**, *8*, 805465.
47. Y.-Y. Huang, Y.-P. Wu, X.-Z. Jia, J. Lin, L.-F. Xiao, D.-M. Liu and M.-H. Liang, *Food Funct* **2022**, *13*, 411-424.
48. H.-M. Jang, K.-E. Lee and D.-H. Kim, *Nutrients* **2019**, *11*,
49. J. Kambe, S. Watcharin, Y. Makioka-Itaya, R. Inoue, G. Watanabe, H. Yamaguchi and K. Nagaoka, *Neurosci Lett* **2020**, *720*, 134753.
50. C. Karen, D. J. H. Shyu and K. E. Rajan, *Front Neurosci* **2021**, *15*, 719933.
51. J.-K. Kim, K.-E. Lee, S.-A. Lee, H.-M. Jang and D.-H. Kim, *Front Immunol* **2020**, *11*, 273.
52. K. Kochalska, W. Oakden, T. Slowik, A. Chudzik, A. Pankowska, A. Łazarczyk, P. Koziol, M. Andres-Mach, R. Pietura, R. Rola, G. J. Stanisz and A. Orzyłowska, *Nutr Res* **2020**, *82*, 44-57.
53. A. Kosuge, K. Kunisawa, S. Arai, Y. Sugawara, K. Shinohara, T. Iida, B. Wulaer, T. Kawai, H. Fujigaki, Y. Yamamoto, K. Saito, T. Nabeshima and A. Mouri, *Brain Behav Immun* **2021**, *96*, 200-211.
54. Q. Li, L. Li, X. Niu, C. Tang, H. Wang, J. Gao and J. Hu, *Neuroreport* **2021**, *32*, 686-693.
55. S. Liang, T. Wang, X. Hu, J. Luo, W. Li, X. Wu, Y. Duan and F. Jin, *Neuroscience* **2015**, *310*, 561-577.
56. J. F. Liao, C. C. Hsu, G. T. Chou, J. S. Hsu, M. T. Liong and Y. C. Tsai, *Benef Microbes* **2019**, *10*, 425-436.



57. E. Y. Lim, E. J. Song, J. G. Kim, S. Y. Jung, S. Y. Lee, H. S. Shin, Y. D. Nam and Y. T. Kim, *Benef Microbes* **2021**, *12*, 503-516.
58. Y. Liu, M. F. Mian, K.-A. McVey Neufeld and P. Forsythe, *Brain Behav Immun* **2020**, *88*, 451-460.
59. Y.-W. Liu, W.-H. Liu, C.-C. Wu, Y.-C. Juan, Y.-C. Wu, H.-P. Tsai, S. Wang and Y.-C. Tsai, *Brain Res* **2016**, *1631*,
60. H. Maehata, Y. Kobayashi, E. Mitsuyama, T. Kawase, T. Kuhara, J.-Z. Xiao, T. Tsukahara and A. Toyoda, *Biosci Biotechnol Biochem* **2019**, *83*, 1239-1247.
61. K.-A. McVey Neufeld, S. Kay and J. Bienenstock, *Front Neurosci* **2018**, *12*, 294.
62. A. Moya-Pérez, A. Perez-Villalba, A. Benítez-Páez, I. Campillo and Y. Sanz, *Brain Behav Immun* **2017**, *65*, 43-56.
63. E. Murray, R. Sharma, K. B. Smith, K. D. Mar, R. Barve, M. Lukasik, A. F. Pirwani, E. Malette-Guyon, S. Lamba, B. J. Thomas, H. Sadeghi-Emamchaie, J. Liang, J.-F. Mallet, C. Matar and N. Ismail, *Brain Behav Immun* **2019**, *81*, 198-212.
64. N. R. Natale, M. Kent, N. Fox, D. Vavra and K. Lambert, *IBRO Neurosci Rep* **2021**, *11*, 207-215.
65. K. A. Partrick, A. M. Rosenhauer, J. Auger, A. R. Arnold, N. M. Ronczkowski, L. M. Jackson, M. N. Lord, S. M. Abdulla, B. Chassaing and K. L. Huhman, *Sci Rep* **2021**, *11*, 3763.
66. E. Patterson, P. M. Ryan, N. Wiley, I. Carafa, E. Sherwin, G. Moloney, E. Franciosi, R. Mandal, D. S. Wishart, K. Tuohy, R. P. Ross, J. F. Cryan, T. G. Dinan and C. Stanton, *Sci Rep* **2019**, *9*, 16323.
67. X. Qiu, G. Wu, L. Wang, Y. Tan and Z. Song, *Ann Transl Med* **2021**, *9*, 366.
68. J. B. Ramalho, M. B. Soares, C. C. Spiazzi, D. F. Bicca, V. M. Soares, J. G. Pereira, W. P. da Silva, C. P. Sehn and F. W. S. Cibir, *Nutrients* **2019**, *11*,
69. J. B. Ramalho, C. C. Spiazzi, D. F. Bicca, J. F. Rodrigues, C. P. Sehn, W. P. da Silva and F. W. S. Cibir, *Behav Brain Res* **2022**, *426*, 113847.
70. S. Sandes, N. Figueiredo, S. Pedroso, F. Sant'Anna, L. Acurcio, M. Abatemarco Junior, P. Barros, F. Oliveira, V. Cardoso, S. Generoso, M. Caliari, J. Nicoli, E. Neumann and Á. Nunes, *Food Res Int* **2020**, *137*, 109741.
71. H. M. Savignac, B. Kiely, T. G. Dinan and J. F. Cryan, *Neurogastroenterol Motil* **2014**, *26*, 1615-1627.
72. L. C. Silva, H. de Souza Lago, M. O. T. Rocha, V. S. de Oliveira, R. Laureano-Melo, E. T. G. Stutz, B. P. de Paula, J. F. P. Martins, R. H. Luchese, A. F. Guerra and P. Rodrigues, *Probiotics Antimicrob Proteins*

2021, 13, 698-708.

73. H. Soltanmoradi, M. Maniati, A. Davoodabadi, A. Mosapour, S. Samavarchi Tehrani, M. Pazhoohan, F. Daemi and H. Khaleghzadeh-Ahangar, *Acta Alimentaria* **2021**, 50, 393-403.
74. W. N. Sovijit, W. E. Sovijit, S. Pu, K. Usuda, R. Inoue, G. Watanabe, H. Yamaguchi and K. Nagaoka, *Neurosci Res* **2019**, 168, 76-82.
75. L. K. Stenman, E. Patterson, J. Meunier, F. J. Roman and M. J. Lehtinen, *Behav Brain Res* **2020**, 379, 112376.
76. J. Sun, F. Wang, X. Hu, C. Yang, H. Xu, Y. Yao and J. Liu, *J Agric Food Chem* **2018**, 66, 8415-8421.
77. X. Sun, H.-F. Zhang, C.-L. Ma, H. Wei, B.-M. Li and J. Luo, *Can J Infect Dis Med Microbiol* **2021**, 2021, 6613903.
78. Y. Sun, W. Geng, Y. Pan, J. Wang, P. Xiao and Y. Wang, *Food Funct* **2019**, 10, 925-937.
79. K. Takahashi, O. Nakagawasai, W. Nemoto, T. Odaira, W. Sakuma, H. Onogi, H. Nishijima, R. Furihata, Y. Nemoto, H. Iwasa, K. Tan-No and T. Tadano, *J Neuroinflammation* **2019**, 16, 201.
80. K. Takahashi, K. Kurokawa, L. Hong, K. Miyagawa, A. Mochida-Saito, M. Iwasa, H. Iwasa, O. Nakagawasai, T. Tadano, H. Takeda and M. Tsuji, *J Psychiatr Res* **2022**, 148, 137-148.
81. P. Tian, R. Zou, L. Song, X. Zhang, B. Jiang, G. Wang, Y.-K. Lee, J. Zhao, H. Zhang and W. Chen, *Food Funct* **2019a**, 10, 7588-7598.
82. P. Tian, G. Wang, J. Zhao, H. Zhang and W. Chen, *J Nutr Biochem* **2019b**, 66, 43-51.
83. P. Tian, K. J. O'Riordan, Y.-K. Lee, G. Wang, J. Zhao, H. Zhang, J. F. Cryan and W. Chen, *Neurobiol Stress* **2020**, 12, 100216.
84. P. Tian, H. Zhu, R. Zou, Q. Kong, M. Xu, J. Zhao, H. Zhang, W. Chen and G. Wang, *Food Funct* **2021a**, 12, 646-655.
85. P. Tian, T. F. S. Bastiaanssen, L. Song, B. Jiang, X. Zhang, J. Zhao, H. Zhang, W. Chen, J. F. Cryan and G. Wang, *Mol Nutr Food Res* **2021b**, 65, e2000704.
86. T. Tian, B. Xu, Y. Qin, L. Fan, J. Chen, P. Zheng, X. Gong, H. Wang, M. Bai, J. Pu, J. Lu, W. Zhou, L. Zhao, D. Yang and P. Xie, *Biochem Biophys Res Commun* **2019**, 516, 430-436.
87. S. Tillmann and G. Wegener, *Behav Brain Res* **2019**, 359, 755-762.
88. F. Trudeau, K. Gilbert, A. Tremblay, T. A. Tompkins, R. Godbout and G. Rousseau, *PLoS One* **2019**, 14, e0215101.
89. P. Wang, K. Tu, P. Cao, Y. Yang, H. Zhang, X.-T. Qiu, M.-M. Zhang, X.-J. Wu, H. Yang and T. Chen, *Mol Brain* **2021**, 14, 49.

90. S. Wang, T. Ishima, J. Zhang, Y. Qu, L. Chang, Y. Pu, Y. Fujita, Y. Tan, X. Wang and K. Hashimoto, *J Neuroinflammation* **2020a**, *17*, 241.
91. C.-L. Wei, S. Wang, J.-T. Yen, Y.-F. Cheng, C.-L. Liao, C.-C. Hsu, C.-C. Wu and Y.-C. Tsai, *Brain Res* **2019**, *1711*, 202-213.
92. R. Xie, P. Jiang, L. Lin, J. Jiang, B. Yu, J. Rao, H. Liu, W. Wei and Y. Qiao, *J Psychiatr Res* **2020b**, *122*, 70-78.
93. J. Xu, M. Tang, X. Wu, X. Kong, Y. Liu and X. Xu, *Food Funct* **2022**, *13*, 4331-4343.
94. M. Xu, P. Tian, H. Zhu, R. Zou, J. Zhao, H. Zhang, G. Wang and W. Chen, *Nutrients* **2022**, *14*,
95. Y. Yang, S. Zhao, X. Yang, W. Li, J. Si and X. Yang, *Neurosci Lett* **2022**, *774*, 136474.
96. S.-W. Yun, J.-K. Kim, K.-E. Lee, Y. J. Oh, H.-J. Choi, M. J. Han and D.-H. Kim, *Nutrients* **2020**, *12*,
97. S. W. Yun, J. K. Kim, M. J. Han and D. H. Kim, *Benef Microbes* **2021**, *12*, 541-551.
98. R. A. Yunes, E. U. Poluektova, E. V. Vasileva, M. V. Odorskaya, M. V. Marsova, G. I. Kovalev and V. N. Danilenko, *Probiotics Antimicrob Proteins* **2020**, *12*, 973-979.
99. Y. Zhao, G. Yang, Z. Zhao, C. Wang, C. Duan, L. Gao and S. Li, *Behav Brain Res* **2020**, *395*, 112853.
100. A. Burokas, S. Arboleya, R. D. Moloney, V. L. Peterson, K. Murphy, G. Clarke, C. Stanton, T. G. Dinan and J. F. Cryan, *Biol Psychiatry* **2017**, *82*, 472-487.
101. Y. Chen, M. Wan, Y. Zhong, T. Gao, Y. Zhang, F. Yan, D. Huang, Y. Wu and Z. Weng, *Mol Nutr Food Res* **2021a**, *65*, e2100146.
102. D. Cheng, H. Chang, S. Ma, J. Guo, G. She, F. Zhang, L. Li, X. Li and Y. Lu, *Molecules* **2018**, *23*,
103. L. Chi, I. Khan, Z. Lin, J. Zhang, M. Y. S. Lee, W. Leong, W. L. W. Hsiao and Y. Zheng, *Phytomedicine* **2020**, *67*, 153157.
104. D. J. Davis, P. M. Hecht, E. Jasarevic, D. Q. Beversdorf, M. J. Will, K. Fritsche and C. H. Gillespie, *Brain Behav Immun* **2017**, *59*, 38-48.
105. F. Donoso, S. Egerton, T. F. S. Bastiaanssen, P. Fitzgerald, S. Gite, F. Fouhy, R. P. Ross, C. Stanton, T. G. Dinan and J. F. Cryan, *Psychoneuroendocrinology* **2020**, *116*, 104673.
106. S. Egerton, F. Donoso, P. Fitzgerald, S. Gite, F. Fouhy, J. Whooley, T. G. Dinan, J. F. Cryan, S. C. Culloty, R. P. Ross and C. Stanton, *Nutr Neurosci* **2020**, *25*, 356-378.
107. L. Fan, Y. Peng, J. Wang, P. Ma, L. Zhao and X. Li, *Phytomedicine* **2021**, *83*, 153471.

108. X. Gao, Y. Feng, H. Xue, M. Meng and X. Qin, *Journal of Liquid Chromatography & Related Technologies* **2020**, *43*, 494-507.
109. M.-j. Gong, B. Han, S.-m. Wang, S.-w. Liang and Z.-j. Zou, *J Pharm Biomed Anal* **2016**, *123*, 63-73.
110. Y. Guo, J. Xie, X. Li, Y. Yuan, L. Zhang, W. Hu, H. Luo, H. Yu and R. Zhang, *Front Pharmacol* **2018**, *9*, 1126.
111. W. Z. Hao, Q. Y. Ma, G. Tao, J. Q. Huang and J. X. Chen, *Food Funct* **2021**, *12*, 12550-12564.
112. Y.-J. Huang, L.-X. C. Choong, S. Panyod, Y.-E. Lin, H.-S. Huang, K.-H. Lu, W.-K. Wu and L.-Y. Sheen, *Phytother Res* **2021**, *35*, 5133-5142.
113. W. D. Lai, T. H. Tung, C. Y. Teng, C. H. Chang, Y. C. Chen, H. Y. Huang, H. C. Lee and S. Y. Huang, *Food Funct* **2022**, *13*, 2662-2680.
114. N. C. Lax, S.-A. J. Parker, E. J. Hilton, Y. Seliman, K. J. Tidgewell and B. J. Kolber, *Synapse* **2018**, *72*, e22059.
115. H.-C. Lee, Y.-C. Lo, S.-C. Yu, T.-H. Tung, I. H. Lin and S.-Y. Huang, *Int J Food Sci Nutr* **2020**, *71*, 440-452.
116. Y. Li, Y. Peng, P. Ma, H. Yang, H. Xiong, M. Wang, C. Peng, P. Tu and X. Li, *Front Pharmacol* **2018**, *9*, 967.
117. S. Lin, Q. Li, S. Jiang, Z. Xu, Y. Jiang, L. Liu, J. Jiang, Y. Tong and P. Wang, *J Ethnopharmacol* **2021**, *268*, 113608.
118. Z. Liu, L. Li, S. Ma, J. Ye, H. Zhang, Y. Li, A. T. Sair, J. Pan, X. Liu, X. Li, S. Yan and X. Liu, *J Agric Food Chem* **2020**, *68*, 13697-13710.
119. A. Mika, H. E. W. Day, A. Martinez, N. L. Rumian, B. N. Greenwood, M. Chichlowski, B. M. Berg and M. Fleshner, *Eur J Neurosci* **2017**, *45*, 342-357.
120. S. M. O'Mahony, K.-A. McVey Neufeld, R. V. Waworuntu, M. M. Pusceddu, S. Manurung, K. Murphy, C. Strain, M. C. Laguna, V. L. Peterson, C. Stanton, B. M. Berg, T. G. Dinan and J. F. Cryan, *Eur J Neurosci* **2020**, *51*, 1042-1058.
121. M. M. Pusceddu, S. El Aidy, F. Crispie, O. O'Sullivan, P. Cotter, C. Stanton, P. Kelly, J. F. Cryan and T. G. Dinan, *PLoS One* **2015**, *10*, e0139721.
122. Y. Qu, K. Zhang, Y. Pu, L. Chang, S. Wang, Y. Tan, X. Wang, J. Zhang, T. Ohnishi, T. Yoshikawa and K. Hashimoto, *J Affect Disord* **2020**, *272*, 66-76.
123. R. C. Robertson, C. Seira Oriach, K. Murphy, G. M. Moloney, J. F. Cryan, T. G. Dinan, R. Paul Ross and C. Stanton, *Brain Behav Immun* **2017**, *59*, 21-37.
124. J. Song, N. Zhou, W. Ma, X. Gu, B. Chen, Y. Zeng, L. Yang and M. Zhou, *Food Funct* **2019b**, *10*, 2947-2957.

125. X. Song, W. Wang, S. Ding, X. Liu, Y. Wang and H. Ma, *J Affect Disord* **2021**, *290*, 353-363.
126. Y. Sun, T. Yan, G. Gong, Y. Li, J. Zhang, B. Wu, K. Bi and Y. Jia, *Int Immunopharmacol* **2020**, *89*, 107029.
127. P. Tian, H. Zhu, X. Qian, Y. Chen, Z. Wang, J. Zhao, H. Zhang, G. Wang and W. Chen, *Front Immunol* **2021**, *12*, 755481.
128. T.-H. Tung, Y.-T. Tung, I. H. Lin, C.-K. Shih, N. T. K. Nguyen, A. Shabrina and S.-Y. Huang, *Biomolecules* **2019**, *9*,
129. B. Valdes-Sustaita, E. Estrada-Camarena, M. E. Gonzalez-Trujano and C. Lopez-Rubalcava, *Neurochem Int* **2021**, *142*, 104904.
130. L. Wang, Y. Sun, T. Zhao, Y. Li, X. Zhao, L. Zhang, L. Wu, L. Zhang, T. Zhang, G. Wei, A. Altamirano, Y. Tong and Z. Yan, *Planta Med* **2020**, *86*, 172-179.
131. L. Wang, X. Wu, Y. Ma, X. Li, J. Zhang and L. Zhao, *Food Funct* **2021**, *12*, 4995-5006.
132. P. Wang, P. Guo, Y. Wang, X. Teng, H. Zhang, L. Sun, M. Xue and H. Liang, *Nutrients* **2022**, *14*,
133. Q. Wang, M. Jia, Y. Zhao, Y. Hui, J. Pan, H. Yu, S. Yan, X. Dai, X. Liu and Z. Liu, *J Agric Food Chem* **2019**, *67*, 12441-12451.
134. R. Wang, T. Chen, Q. Wang, X.-M. Yuan, Z.-L. Duan, Z.-Y. Feng, Y. Ding, F. Bu, G.-P. Shi and Y.-G. Chen, *Drug Des Devel Ther* **2021**, *15*, 2999-3016.
135. J. Xia, L. Gu, Y. Guo, H. Feng, S. Chen, J. Jurat, W. Fu and D. Zhang, *Front Cell Infect Microbiol* **2021**, *11*, 627608.
136. Q. Xiao, R. Shu, C. Wu, Y. Tong, Z. Xiong, J. Zhou, C. Yu, X. Xie and Z. Fu, *J Affect Disord* **2020**, *276*, 476-486.
137. M. Xue, X. Teng, H. Liang, J. Zhao, Y. Jiang, X. Qiu, Z. Zhang, Z. Pei, N. Zhang and Y. Qin, *Journal of Functional Foods* **2021**, *86*,
138. T. Yan, T. Nian, Z. Liao, F. Xiao, B. Wu, K. Bi, B. He and Y. Jia, *Int J Biol Macromol* **2020**, *144*, 427-440.
139. T. Yan, N. Wang, B. Liu, B. Wu, F. Xiao, B. He and Y. Jia, *Phytother Res* **2021**, *35*, 289-296.
140. J.-B. Yu, Z.-X. Zhao, R. Peng, L.-B. Pan, J. Fu, S.-R. Ma, P. Han, L. Cong, Z.-W. Zhang, L.-X. Sun, J.-D. Jiang and Y. Wang, *Front Pharmacol* **2019**, *10*, 268.
141. L. Zhang, L. Wang, L. Huang, Y. Zhao, H. Ding, B. Li, L. Wen, W. Xiong, Y. Liu, T. Zhang, L. Zhang, L. Wu, Q. Xu, Y. Fan, G. Wei, Q. Yin, Y. Chen, T. Zhang and Z. Yan, *Pharm Biol* **2021**, *59*, 912-921.
142. M. Zhang, A. Li, Q. Yang, J. Li, L. Wang, X. Liu, Y. Huang and L. Liu, *Front Cell Infect Microbiol* **2021**, *11*, 665159.

143. Z. Zhang, C. Yao, M. Li, L. C. Wang, W. Huang and Q. J. Chen, *Lett Appl Microbiol* **2022**,
144. B. Zhao, J. Wu, J. Li, Y. Bai, Y. Luo, B. Ji, B. Xia, Z. Liu, X. Tan, J. Lv and X. Liu, *J Agric Food Chem* **2020**, *68*, 3963-3975.
145. F. Zhao, S. Guan, Y. Fu, K. Wang, Z. Liu and T. B. Ng, *Biomed Pharmacother* **2021**, *143*, 112087.
146. Z. X. Zhao, J. Fu, S. R. Ma, R. Peng, J. B. Yu, L. Cong, L. B. Pan, Z. G. Zhang, H. Tian, C. T. Che, Y. Wang and J. D. Jiang, *Theranostics* **2018**, *8*, 5945-5959.
147. H. Li, P. Wang, L. Huang, P. Li and D. Zhang, *Neurogastroenterol Motil* **2019**, *31*, e13677.
148. K. Gilbert, J. Arseneault-Breard, F. Flores Monaco, A. Beaudoin, T. M. Bah, T. A. Tompkins, R. Godbout and G. Rousseau, *Br J Nutr* **2012**, *109*, 50-6.
149. X. Zhu, Y. Sun, C. Zhang and H. Liu, *Mol Med Rep* **2017**, *15*, 3161-3171.
150. S. Westfall, F. Caracci, M. Estill, T. Frolinger, L. Shen and G. M. Pasinetti, *Front Immunol* **2021**, *12*, 670500.
151. S. Westfall, F. Caracci, D. Zhao, Q.-L. Wu, T. Frolinger, J. Simon and G. M. Pasinetti, *Brain Behav Immun* **2021b**, *91*, 350-368.
152. A. Mesripour and P. Rakhshankhah, *Turk J Pharm Sci* **2021**, *18*, 21-27.
153. A. Leo, C. De Caro, P. Mainardi, M. Tallarico, V. Nesci, N. Marascio, P. Striano, E. Russo, A. Constanti, G. De Sarro and R. Citraro, *Neuropharmacology* **2021**, *198*, 108782.
154. R. Cheng, W. Xu, J. Wang, Z. Tang and M. Zhang, *Biochem Biophys Res Commun* **2021**, *566*, 170-176.
155. A. J. Kochanowska, K. V. Rao, S. Childress, A. El-Alfy, R. R. Matsumoto, M. Kelly, G. S. Stewart, K. J. Sufka and M. T. Hamann, *J Nat Prod* **2008**, *71*, 186-9.
156. J. Li, L. Hou, C. Wang, X. Jia, X. Qin and C. Wu, *Front Psychiatry* **2018**, *9*, 454.
157. Y. Matsuda, N. Ozawa, T. Shinozaki, K. I. Wakabayashi, K. Suzuki, Y. Kawano, I. Ohtsu and Y. Tatebayashi, *Transl Psychiatry* **2020**, *10*, 170.
158. M. Yu, H.-M. Jia, L.-L. Qin and Z.-M. Zou, *J Affect Disord* **2021**, *297*,
159. K. Suzuki, K. Nakamura, Y. Shimizu, Y. Yokoi, S. Ohira, M. Hagiwara, Y. Wang, Y. Song, T. Aizawa and T. Ayabe, *Sci Rep* **2021**, *11*, 9915.
160. D. Martin-Hernández, J. R. Caso, Á. G. Bris, S. R. Maus, J. L. M. Madrigal, B. García-Bueno, K. S. MacDowell, L. Alou, M. L. Gómez-Lus and J. C. Leza, *Neuropharmacology* **2016**, *103*, 122-133.

161. C. Meng, S. Feng, Z. Hao, C. Dong and H. Liu, *Psychoneuroendocrinology* **2022**, *136*, 105620.
162. A. K. Schmidtner, D. A. Slattery, J. Gläsner, A. Hiergeist, K. Gryksa, V. A. Malik, J. Hellmann-Regen, I. Heuser, T. C. Baghai, A. Gessner, R. Rupprecht, B. Di Benedetto and I. D. Neumann, *Transl Psychiatry* **2019**, *9*, 223.
163. S. Wang, Y. Qu, L. Chang, Y. Pu, K. Zhang and K. Hashimoto, *J Affect Disord* **2020b**, *260*, 448-457.
164. M. L. Wong, A. Inerra, M. D. Lewis, C. A. Mastronardi, L. Leong, J. Choo, S. Kentish, P. Xie, M. Morrison, S. L. Wesselingh, G. B. Rogers and J. Licinio, *Mol Psychiatry* **2016**, *21*, 797-805.
165. Q. Yang, L. Luo, T. Sun, L. Yang, L.-F. Cheng, Y. Wang, Q.-Q. Liu, A. Liu, H.-Y. Liu, M.-G. Zhao, S.-X. Wu and B. Feng, *Psychopharmacology (Berl)* **2020**, *237*, 3201-3213.

**Table S13.** A summary of probiotics that alleviate depression symptoms.

| <b>Probiotics</b>                                                 | <b>objects</b>             | <b>Probiotics</b>                                 | <b>objects</b>             |
|-------------------------------------------------------------------|----------------------------|---------------------------------------------------|----------------------------|
| Akkermansia_muciniphila                                           | Animal models              | Lactobacillus_diacetylactis                       | Animal models              |
| Akkermansia_muciniphila ATCC® BAA-835™                            | Animal models              | Lactobacillus_fermentum                           | Human beings,Animal models |
| Bacillus_coagulans MTCC 5856                                      | Human beings               | Lactobacillus_gasseri NK109                       | Animal models              |
| Bacillus_coagulans Unique IS2                                     | Human beings               | Lactobacillus_helveticus                          | Animal models              |
| Bacillus_sp.DU-106                                                | Animal models              | Lactobacillus_helveticus 132M1                    | Animal models              |
| Bacillus_subtilis                                                 | Animal models              | Lactobacillus_helveticus LA 102                   | Animal models              |
| Bifidobacteria                                                    | Animal models              | Lactobacillus_helveticus LH0138                   | Animal models              |
| Bifidobacterium                                                   | Human beings,Animal models | Lactobacillus_helveticus MCC1848                  | Animal models              |
| Bifidobacterium spp.                                              | Human beings               | Lactobacillus_helveticus NS8                      | Animal models              |
| Bifidobacterium_adolescentis                                      | Human beings,Animal models | Lactobacillus_helveticus PXN® 45                  | Human beings               |
| Bifidobacterium_adolescentis 150                                  | Animal models              | Lactobacillus_helveticus R0052                    | Human beings,Animal models |
| Bifidobacterium_adolescentis NK98                                 | Human beings,Animal models | Lactobacillus_helveticus W74                      | Animal models              |
| Bifidobacterium_animalis BL0005                                   | Animal models              | Lactobacillus_intestinalis                        | Animal models              |
| Bifidobacterium_animalis ssp.lactis 420                           | Animal models              | Lactobacillus_intestinalis YT2                    | Animal models              |
| Bifidobacterium_bifidum                                           | Human beings,Animal models | Lactobacillus_johnsonii                           | Animal models              |
| Bifidobacterium_bifidum BIA-6                                     | Human beings               | Lactobacillus_kefiranofaciens ZW3                 | Animal models              |
| Bifidobacterium_bifidum plus inulin                               | Human beings               | Lactobacillus_lactis                              | Human beings,Animal models |
| Bifidobacterium_bifidum PXN® 23                                   | Human beings               | Lactobacillus_lactis ssp. lactis PXN® 63          | Human beings               |
| Bifidobacterium_bifidum W23                                       | Human beings,Animal models | Lactobacillus_mucosae NK41                        | Animal models              |
| Bifidobacterium_breve                                             | Animal models              | Lactobacillus_murinus                             | Animal models              |
| Bifidobacterium_breve 1205                                        | Animal models              | Lactobacillus_paracasei 126L6                     | Animal models              |
| Bifidobacterium_breve A-1 (synonym Bifidobacterium_breve MCC1274) | Human beings               | Lactobacillus_paracasei DTA 81                    | Animal models              |
| Bifidobacterium_breve CCFM1025                                    | Human beings,Animal models | Lactobacillus_paracasei HT6                       | Animal models              |
| Bifidobacterium_breve FHLJDQ3M5                                   | Animal models              | Lactobacillus_paracasei Lpc-37                    | Animal models              |
| Bifidobacterium_breve M-16V                                       | Animal models              | Lactobacillus_paracasei NK112                     | Animal models              |
| Bifidobacterium_breve M2CF22M7                                    | Animal models              | Lactobacillus_paracasei PS23                      | Animal models              |
| Bifidobacterium_breve PXN® 25                                     | Human beings               | Lactobacillus_paracasei PS23 (PS23)               | Animal models              |
| Bifidobacterium_breve UBBr01                                      | Human beings               | Lactobacillus_plantarum                           | Animal models              |
| Bifidobacterium_breve W25                                         | Animal models              | Lactobacillus_plantarum 15953 (strain CGMCC15953) | Animal models              |
| Bifidobacterium_infantis                                          | Animal models              | Lactobacillus_plantarum 286 (Lp 286)              | Animal models              |
| Bifidobacterium_infantis 35624                                    | Animal models              | Lactobacillus_plantarum 81 (Lp 81)                | Animal models              |
| Bifidobacterium_infantis PXN® 27                                  | Human beings               | Lactobacillus_plantarum 8PA3                      | Animal models              |
| Bifidobacterium_infantis UBB101                                   | Human beings               | Lactobacillus_plantarum 90sk                      | Animal models              |
| Bifidobacterium_lactis                                            | Animal models              | Lactobacillus_plantarum ATCC 793                  | Animal models              |
| Bifidobacterium_lactis BAMA-B06/Bau-B0111                         | Human beings               | Lactobacillus_plantarum DMDL 9010 (LP9010)        | Animal models              |
| Bifidobacterium_lactis BIA-7                                      | Human beings               | Lactobacillus_plantarum LP12151                   | Animal models              |
| Bifidobacterium_lactis UBBLa70                                    | Human beings               | Lactobacillus_plantarum LP12407                   | Animal models              |
| Bifidobacterium_lactis W51                                        | Animal models              | Lactobacillus_plantarum LP12418                   | Animal models              |
| Bifidobacterium_lactis W52                                        | Human beings,Animal models | Lactobacillus_plantarum LP3                       | Animal models              |
| Bifidobacterium_longum                                            | Animal models              | Lactobacillus_plantarum MTCC 9510                 | Animal models              |
| Bifidobacterium_longum NK46                                       | Animal models              | Lactobacillus_plantarum PS128                     | Animal models              |
| Bifidobacterium_longum R0175                                      | Human beings               | Lactobacillus_plantarum PS128 (PS128)             | Human beings               |
| Bifidobacterium_longum 1714                                       | Animal models              | Lactobacillus_plantarum PXN® 47                   | Human beings               |
| Bifidobacterium_longum ATCC 15707                                 | Animal models              | Lactobacillus_plantarum R1012                     | Animal models              |
| Bifidobacterium_longum BG0014                                     | Animal models              | Lactobacillus_plantarum UBLP40                    | Human beings               |
| Bifidobacterium_longum BIA-8                                      | Human beings               | Lactobacillus_plantarum WLPL04                    | Animal models              |
| Bifidobacterium_longum LA 101                                     | Animal models              | Lactobacillus_plantarumWJL                        | Animal models              |
| Bifidobacterium_longum NCC3001                                    | Human beings               | Lactobacillus_reuteri                             | Human beings,Animal models |
| Bifidobacterium_longum PXN® 30                                    | Human beings               | Lactobacillus_reuteri (DSM 17938)                 | Human beings               |
| Bifidobacterium_longum R0175                                      | Human beings,Animal models | Lactobacillus_reuteri 3                           | Animal models              |
| Bifidobacterium_longum ssp. infantis B111471                      | Animal models              | Lactobacillus_reuteri CCFM1132                    | Animal models              |
| Bifidobacterium_longum subsp. Infantis                            | Animal models              | Lactobacillus_reuteri NK33                        | Human beings,Animal models |
| Bifidobacterium_longum subsp. infantis E41                        | Animal models              | Lactobacillus_rhamnosus                           | Human beings,Animal models |
| Bifidobacterium_longum subsp. Longum                              | Animal models              | Lactobacillus_rhamnosus (JB-1)                    | Animal models              |



|                                                                        |                            |  |                                           |                            |
|------------------------------------------------------------------------|----------------------------|--|-------------------------------------------|----------------------------|
| Bifidobacterium_longum subsp. Longum BAMA-B05/BauB1024                 | Human beings               |  | Lactobacillus_rhamnosus B-8238            | Animal models              |
| Bifidobacterium_longum subsp.infantis CCFM687                          | Animal models              |  | Lactobacillus_rhamnosus CCFM1131          | Animal models              |
| Bifidobacterium_longum W108                                            | Animal models              |  | Lactobacillus_rhamnosus CGMCC1.3724       | Human beings               |
| Bifidobacterium_pseudocatenulatum CECT 7765                            | Animal models              |  | Lactobacillus_rhamnosus G                 | Human beings               |
| Bifidobacterium_subtilis PXN® 21                                       | Human beings               |  | Lactobacillus_rhamnosus GG                | Animal models              |
| Clostridium_butyricum MIY AIRI 588 (CBM588)                            | Human beings,Animal models |  | Lactobacillus_rhamnosus HN001             | Human beings               |
| Clostridium_butyricum WZMC1018                                         | Animal models              |  | Lactobacillus_rhamnosus JB-1              | Animal models              |
| Enterococcus_faecalis 2001 (EF-2001)                                   | Animal models              |  | Lactobacillus_rhamnosus LR5               | Animal models              |
| Enterococcus_faecalis strain EC-12 (EC-12)                             | Animal models              |  | Lactobacillus_rhamnosus LX11881           | Animal models              |
| Faecalibacterium_prausnitzii (ATCC 27766)                              | Animal models              |  | Lactobacillus_rhamnosus PXN® 54           | Human beings               |
| Fermented Milk Containing Lactobacillus_paracasei Strain Shirota (LcS) | Human beings               |  | Lactobacillus_rhamnosus R0011             | Animal models              |
| Komagataella_pastoris KM71H                                            | Animal models              |  | Lactobacillus_rhamnosus UBLR58            | Human beings               |
| Lactobacillus_plantarum DP189                                          | Animal models              |  | Lactobacillus_rhamnosus W71               | Animal models              |
| Lactobacillus_plantarum PS128TM                                        | Human beings               |  | Lactobacillus_rhamnosus zz-1              | Animal models              |
| Lactobacillus_acidophilus                                              | Human beings,Animal models |  | Lactobacillus_salivarius                  | Animal models              |
| Lactobacillus_acidophilus LA11873                                      | Animal models              |  | Lactobacillus_salivarius HA-118           | Animal models              |
| Lactobacillus_acidophilus PXN® 35                                      | Human beings               |  | Lactobacillus_salivarius Ls-33            | Animal models              |
| Lactobacillus_acidophilus T16                                          | Human beings               |  | Lactobacillus_salivarius PXN® 57          | Human beings               |
| Lactobacillus_acidophilus W37                                          | Human beings,Animal models |  | Lactobacillus_salivarius W24              | Human beings,Animal models |
| Lactobacillus_brevis                                                   | Animal models              |  | Lactococcus_lactis                        | Animal models              |
| Lactobacillus_brevis DPC6108                                           | Animal models              |  | Lactococcus_lactis LA 103                 | Animal models              |
| Lactobacillus_brevis DSM32386                                          | Animal models              |  | Lactococcus_lactis strain WHH2078         | Animal models              |
| Lactobacillus_brevis FPA 3709                                          | Animal models              |  | Lactococcus_lactis subsp. cremoris LL95   | Animal models              |
| Lactobacillus_brevis J1                                                | Animal models              |  | Lactococcus_lactis W19                    | Human beings,Animal models |
| Lactobacillus_brevis W63                                               | Human beings,Animal models |  | Lactococcus_lactis W58                    | Human beings,Animal models |
| Lactobacillus_bulgaricus                                               | Animal models              |  | Pediococcus_acidilactici                  | Animal models              |
| Lactobacillus_casei                                                    | Human beings,Animal models |  | Prevotella_histicola DSM19854             | Animal models              |
| Lactobacillus_casei DG                                                 | Animal models              |  | Probiotic NVP-1704                        | Human beings               |
| Lactobacillus_casei PXN® 37                                            | Human beings               |  | Rhizopus_chinensis 12                     | Animal models              |
| Lactobacillus_casei strain Shirota (LcS )                              | Human beings               |  | Streptococcus_cerevisiae S-04             | Animal models              |
| Lactobacillus_casei W56                                                | Human beings,Animal models |  | Streptococcus_cerevisiae var boulardii 17 | Animal models              |
| Lactobacillus_cremoris                                                 | Animal models              |  | Streptococcus_thermophilus                | Human beings,Animal models |
| Lactobacillus_delbrueckii                                              | Animal models              |  | Streptococcus_thermophilus LA 104         | Animal models              |
| Lactobacillus_delbrueckii ssp. bulgaricus PXN® 39                      | Human beings               |  | Streptococcus_thermophilus PXN® 66        | Human beings               |
| Lactobacillus_delbrueckii subsp. Bulgaricus                            | Human beings,Animal models |  | Weissella_parmesenteroides WpK4           | Animal models              |

**Table S14.** Search strategy for electronic databases.

| Search strategy for PubMed                  |                                                                                                                                                                             | Hits      |
|---------------------------------------------|-----------------------------------------------------------------------------------------------------------------------------------------------------------------------------|-----------|
| #1                                          | (depress*[Title/Abstract] OR dysthymi*[Title/Abstract] OR mood disorder*[Title/Abstract] OR affective disorder*[Title/Abstract] OR antidepress*[Title/Abstract])            | 556,593   |
| #2                                          | (microb*[Title/Abstract] OR bacteria*[Title/Abstract] OR metaproteom*[Title/Abstract] OR metagenom*[Title/Abstract] OR "16S rRNA"[Title/Abstract] OR flora[Title/Abstract]) | 1,075,172 |
| #3                                          | #1 AND #2                                                                                                                                                                   | 5,634     |
| Search strategy for Web of Science          |                                                                                                                                                                             |           |
| #1                                          | TS=(depress* OR dysthymi* OR mood disorder* OR affective disorder* OR antidepress*)                                                                                         | 502,875   |
| #2                                          | Topic=(microb* OR bacteria* OR metaproteom* OR metagenom* OR "16S rRNA" OR flora)                                                                                           | 1,209,922 |
| #3                                          | #1 AND #2                                                                                                                                                                   | 6,594     |
| Search strategy for Cochrane Library        |                                                                                                                                                                             |           |
| #1                                          | (depress*):ti OR (dysthymi*):ti OR (mood disorder*):ti OR (affective disorder*):ti OR (antidepress*):ti                                                                     | 36,107    |
| #2                                          | (microb*):ti,ab,kw OR (bacteria*):ti,ab,kw OR (metaproteom*):ti,ab,kw OR (metagenom*):ti,ab,kw OR ("16S rRNA"):ti,ab,kw OR (flora):ti,ab,kw                                 | 56,167    |
| #3                                          | #1 AND #2                                                                                                                                                                   | 129       |
| Search strategy for EMBASE-MEDLINE-PsycINFO |                                                                                                                                                                             |           |
| #1                                          | depress*:ab,ti OR dysthymi*:ab,ti OR "mood disorder*":ab,ti OR "affective disorder*":ab,ti OR antidepress*:ab,ti                                                            | 1,063,823 |
| #2                                          | microb*:ab,ti OR bacteria*:ab,ti OR metaproteom*:ab,ti OR metagenom*:ab,ti OR "16S rRNA":ab,ti OR flora: ab,ti                                                              | 1,300,339 |
| #3                                          | #1 AND #2                                                                                                                                                                   | 7,992     |

**Table S15.** Search strategy for microbiota-based interventions of depression from PubMed.

| Search strategy for PubMed                                                                                                                                                                                                                                                                                       | Hits    |
|------------------------------------------------------------------------------------------------------------------------------------------------------------------------------------------------------------------------------------------------------------------------------------------------------------------|---------|
| #1 (depress*[Title/Abstract] OR dysthymi*[Title/Abstract] OR mood disorder*[Title/Abstract] OR affective disorder*[Title/Abstract] OR antidepress*[Title/Abstract])                                                                                                                                              | 474,410 |
| #2 (microb*[Title/Abstract] OR flora[Title/Abstract] OR probiotic*[Title/Abstract] OR prebiotic*[Title/Abstract] OR synbiotic*[Title/Abstract] OR psychobiotic*[Title/Abstract] OR postbiotic*[Title/Abstract] OR "fecal microbiota transplantation"[Title/Abstract] OR "fecal transplantation"[Title/Abstract]) | 639,026 |
| #3 #1 AND #2                                                                                                                                                                                                                                                                                                     | 3,633   |
